# Supplementary material
Source: Research Square preprint supplement (doi:10.21203/rs.3.rs-9648282/v1)
Supplement: Supplementary file 1 [file 051ffc80fac9cbcea97c86d3.xlsx]

## Sheet: Summary
miRNA cargo from pleural mesothelioma-derived extracellular vesicles reprograms fibroblasts to cancer associated phenotype
Vivek Dharwal1,3, Winston Lay1, Richard Zelei1,3, Ali Azimi 7,8, Lucy Wang1, Tim Huang6, Ling Zhuang1, Georges Grau3, Stephen Clarke3, Steven Kao1,5, Fatemeh Vafaee4,6, Zaklina Kovacevic2, Elham Hosseini-Beheshti1,3,9
Sheet S-1: List of top 5 up and downregulated miRNAs in 100k VMC23 EV fractions and and , along with their corresponding predicted mRNA targets that exhibited differential expression in fibroblasts (MRC5) after treatment with these EVs.
Sheet S-2: List of top 5 up and downregulated miRNAs in 100k MSTO EV fractions and and , along with their corresponding predicted mRNA targets that exhibited differential expression in fibroblasts (MRC5) after treatment with these EVs.

## Sheet: Sheet S-1
Sheet S-1: List of top 5 up and downregulated miRNAs in 100k VMC23 EV fractions and and , along with their corresponding predicted mRNA targets that exhibited differential expression in fibroblasts (MRC5) after treatment with these EVs.
Upregulated miRNA in VMC_100k, Downregulated mRNA targets in Fibroblast (MRC5) treated with these EVs
miRNA	mRNA
hsa-miR-342-3p	SOD2
hsa-miR-342-3p	RFTN2
hsa-miR-342-3p	RALGPS1
hsa-miR-342-3p	PSAT1
hsa-miR-342-3p	KCTD15
hsa-miR-342-3p	IGFBP5
hsa-miR-342-3p	EGR3
hsa-miR-376a-3p	PARD6B
hsa-miR-376a-3p	ITGB8
hsa-miR-376c-3p	VLDLR
hsa-miR-376c-3p	TGFBR1
hsa-miR-376c-3p	RPS6KA5
hsa-miR-483-3p	UNC5B
hsa-miR-483-3p	SOD2
hsa-miR-483-3p	PLEKHH2
hsa-miR-483-3p	DEPP1
hsa-miR-485-5p	VCAM1
hsa-miR-485-5p	PDPN
hsa-miR-485-5p	IPCEF1
hsa-miR-485-5p	ICAM1
hsa-miR-485-5p	GXYLT2
hsa-miR-485-5p	CRISPLD2
hsa-miR-485-5p	C3
hsa-miR-485-5p	ARHGEF3
Downregulated miRNA in VMC_100k, Upregulated mRNA targets in Fibroblast (MRC5) treated with these EVs
miRNA	mRNA
hsa-let-7e-5p	RRM2
hsa-let-7e-5p	NPTX1
hsa-let-7e-5p	NCEH1
hsa-let-7e-5p	KIFC1
hsa-let-7e-5p	ITGA6
hsa-let-7e-5p	EZH2
hsa-let-7e-5p	MT-CO2
hsa-let-7e-5p	NCAPG2
hsa-let-7e-5p	CD68
hsa-let-7e-5p	AURKB
hsa-let-7e-5p	XRCC2
hsa-let-7e-5p	UBE2C
hsa-let-7e-5p	TYMS
hsa-let-7e-5p	TTK
hsa-let-7e-5p	TROAP
hsa-let-7e-5p	TRIP13
hsa-let-7e-5p	TRAIP
hsa-let-7e-5p	TPPP
hsa-let-7e-5p	TOP2A
hsa-let-7e-5p	TMPO
hsa-let-7e-5p	TK1
hsa-let-7e-5p	TIMELESS
hsa-let-7e-5p	THBD
hsa-let-7e-5p	TFPI2
hsa-let-7e-5p	TACC3
hsa-let-7e-5p	SUV39H1
hsa-let-7e-5p	STIL
hsa-let-7e-5p	SPDL1
hsa-let-7e-5p	SMC4
hsa-let-7e-5p	SMC2
hsa-let-7e-5p	SLITRK1
hsa-let-7e-5p	SLC16A9
hsa-let-7e-5p	SHMT1
hsa-let-7e-5p	SERPINI1
hsa-let-7e-5p	RRM1
hsa-let-7e-5p	RFC3
hsa-let-7e-5p	RECQL4
hsa-let-7e-5p	RBL1
hsa-let-7e-5p	RAD54B
hsa-let-7e-5p	RACGAP1
hsa-let-7e-5p	PTPRR
hsa-let-7e-5p	PTPRB
hsa-let-7e-5p	PSMC3IP
hsa-let-7e-5p	PRR11
hsa-let-7e-5p	PRLR
hsa-let-7e-5p	PRIM1
hsa-let-7e-5p	PRC1
hsa-let-7e-5p	PPP2R2C
hsa-let-7e-5p	POLQ
hsa-let-7e-5p	POLE2
hsa-let-7e-5p	POLE
hsa-let-7e-5p	POLD1
hsa-let-7e-5p	POLA2
hsa-let-7e-5p	PODXL
hsa-let-7e-5p	PLP2
hsa-let-7e-5p	PLK4
hsa-let-7e-5p	PLK1
hsa-let-7e-5p	PLEK2
hsa-let-7e-5p	PKN3
hsa-let-7e-5p	PKMYT1
hsa-let-7e-5p	PBK
hsa-let-7e-5p	ORC6
hsa-let-7e-5p	ORC1
hsa-let-7e-5p	OIP5
hsa-let-7e-5p	NEK2
hsa-let-7e-5p	NEIL3
hsa-let-7e-5p	NEFH
hsa-let-7e-5p	NDC80
hsa-let-7e-5p	NCAPH
hsa-let-7e-5p	NCAPG
hsa-let-7e-5p	NCAPD2
hsa-let-7e-5p	MYBL2
hsa-let-7e-5p	MYBL1
hsa-let-7e-5p	MT-ND5
hsa-let-7e-5p	MT-ND4
hsa-let-7e-5p	MT-ND3
hsa-let-7e-5p	MT-ND2
hsa-let-7e-5p	MT-ND1
hsa-let-7e-5p	MT-ATP6
hsa-let-7e-5p	MMP16
hsa-let-7e-5p	MMP1
hsa-let-7e-5p	MKI67
hsa-let-7e-5p	MCM5
hsa-let-7e-5p	MCM4
hsa-let-7e-5p	MCM3
hsa-let-7e-5p	MCM2
hsa-let-7e-5p	MCM10
hsa-let-7e-5p	MAD2L1
hsa-let-7e-5p	LY6K
hsa-let-7e-5p	LMNB1
hsa-let-7e-5p	LIG1
hsa-let-7e-5p	LAMC2
hsa-let-7e-5p	L1CAM
hsa-let-7e-5p	KNTC1
hsa-let-7e-5p	KLHL3
hsa-let-7e-5p	KLF2
hsa-let-7e-5p	KIF4A
hsa-let-7e-5p	KIF23
hsa-let-7e-5p	KIF22
hsa-let-7e-5p	KIF20B
hsa-let-7e-5p	KIF20A
hsa-let-7e-5p	KIF15
hsa-let-7e-5p	KIF14
hsa-let-7e-5p	KIF11
hsa-let-7e-5p	ITGA3
hsa-let-7e-5p	INCENP
hsa-let-7e-5p	INA
hsa-let-7e-5p	ID1
hsa-let-7e-5p	HMMR
hsa-let-7e-5p	HMGB2
hsa-let-7e-5p	HERC4
hsa-let-7e-5p	HELLS
hsa-let-7e-5p	HECW2
hsa-let-7e-5p	HASPIN
hsa-let-7e-5p	HAS2
hsa-let-7e-5p	H2BC5
hsa-let-7e-5p	H2BC18
hsa-let-7e-5p	GPR39
hsa-let-7e-5p	GINS3
hsa-let-7e-5p	GINS2
hsa-let-7e-5p	GINS1
hsa-let-7e-5p	GATA3
hsa-let-7e-5p	FZD8
hsa-let-7e-5p	FOXM1
hsa-let-7e-5p	FOXE1
hsa-let-7e-5p	FLNC
hsa-let-7e-5p	FEN1
hsa-let-7e-5p	FBXO5
hsa-let-7e-5p	FANCI
hsa-let-7e-5p	FANCD2
hsa-let-7e-5p	FANCA
hsa-let-7e-5p	EZR
hsa-let-7e-5p	EXO1
hsa-let-7e-5p	ESPL1
hsa-let-7e-5p	ERCC6L
hsa-let-7e-5p	EPHA5
hsa-let-7e-5p	EDN1
hsa-let-7e-5p	EBP
hsa-let-7e-5p	E2F2
hsa-let-7e-5p	DTL
hsa-let-7e-5p	DRAP1
hsa-let-7e-5p	DNAJC6
hsa-let-7e-5p	DLGAP5
hsa-let-7e-5p	DKK1
hsa-let-7e-5p	DHFR
hsa-let-7e-5p	DEPDC1B
hsa-let-7e-5p	DEPDC1
hsa-let-7e-5p	CPA4
hsa-let-7e-5p	COL4A4
hsa-let-7e-5p	CLSPN
hsa-let-7e-5p	CLDN4
hsa-let-7e-5p	CKAP2
hsa-let-7e-5p	CIT
hsa-let-7e-5p	CHTF18
hsa-let-7e-5p	CHAF1A
hsa-let-7e-5p	CEP55
hsa-let-7e-5p	CENPN
hsa-let-7e-5p	CENPK
hsa-let-7e-5p	CENPI
hsa-let-7e-5p	CENPF
hsa-let-7e-5p	CENPE
hsa-let-7e-5p	CDKN3
hsa-let-7e-5p	CDKN2C
hsa-let-7e-5p	CDH18
hsa-let-7e-5p	CDCA8
hsa-let-7e-5p	CDCA5
hsa-let-7e-5p	CDCA3
hsa-let-7e-5p	CDC6
hsa-let-7e-5p	CDC25A
hsa-let-7e-5p	CDC20
hsa-let-7e-5p	CCNF
hsa-let-7e-5p	CCNE2
hsa-let-7e-5p	CCNB1
hsa-let-7e-5p	CCNA2
hsa-let-7e-5p	BUB1B
hsa-let-7e-5p	BUB1
hsa-let-7e-5p	BRCA2
hsa-let-7e-5p	BRCA1
hsa-let-7e-5p	BLM
hsa-let-7e-5p	AXL
hsa-let-7e-5p	ATP10A
hsa-let-7e-5p	ATAD2
hsa-let-7e-5p	ASF1B
hsa-let-7e-5p	ARHGAP11A
hsa-let-7e-5p	ANLN
hsa-let-7e-5p	ACTA1
hsa-let-7e-5p	ACAT2
hsa-let-7e-5p	ABCC9
hsa-miR-181b-5p	KIF2C
hsa-miR-181b-5p	SPP1
hsa-miR-181b-5p	NCAPG
hsa-miR-181b-5p	MT-ATP6
hsa-miR-181b-5p	INCENP
hsa-miR-181b-5p	HECW2
hsa-miR-181b-5p	H3C4
hsa-miR-181b-5p	H1-4
hsa-miR-181b-5p	FKBP1C
hsa-miR-181b-5p	E2F1
hsa-miR-181b-5p	CIP2A
hsa-miR-196a-5p	CKAP2L
hsa-miR-196a-5p	UBE2C
hsa-miR-196a-5p	TYMS
hsa-miR-196a-5p	MT-ND5
hsa-miR-196a-5p	MT-ND4L
hsa-miR-196a-5p	MT-ND4
hsa-miR-196a-5p	MT-ATP6
hsa-miR-196a-5p	KIF18B
hsa-miR-196a-5p	H2BC5
hsa-miR-196a-5p	H2BC3
hsa-miR-196a-5p	ESPL1
hsa-miR-196a-5p	E2F7
hsa-miR-196a-5p	CCNE2
hsa-miR-196a-5p	BUB1
hsa-miR-20a-5p	RRM2
hsa-miR-20a-5p	KIF2C
hsa-miR-20a-5p	UBE2C
hsa-miR-20a-5p	STIL
hsa-miR-20a-5p	RFC3
hsa-miR-20a-5p	RBL1
hsa-miR-20a-5p	RACGAP1
hsa-miR-20a-5p	PRIM1
hsa-miR-20a-5p	POLQ
hsa-miR-20a-5p	PKMYT1
hsa-miR-20a-5p	NCAPD2
hsa-miR-20a-5p	MELK
hsa-miR-20a-5p	KIF23
hsa-miR-20a-5p	HMGB2
hsa-miR-20a-5p	HAS2
hsa-miR-20a-5p	E2F1
hsa-miR-20a-5p	CKAP2
hsa-miR-20a-5p	CIT
hsa-miR-20a-5p	CHAF1A
hsa-miR-20a-5p	CCNB1
hsa-miR-20a-5p	ATAD2
hsa-miR-31-5p	MMP16

## Sheet: Sheet S-2
Sheet S-2: List of top 5 up and downregulated miRNAs in 100k MSTO EV fractions and and , along with their corresponding predicted mRNA targets that exhibited differential expression in fibroblasts (MRC5) after treatment with these EVs.
Upregulated miRNA in MSTO_100k, Downregulated mRNA targets in Fibroblast (MRC5) treated with these EVs
miRNA	mRNA
hsa-miR-122-5p	ATP1A2
hsa-miR-122-5p	RAB11FIP1
hsa-miR-122-5p	CD83
hsa-miR-122-5p	SOCS1
hsa-miR-122-5p	FHL2
hsa-miR-122-5p	OLR1
hsa-miR-122-5p	PLD1
hsa-miR-122-5p	PMP22
hsa-miR-122-5p	QSOX1
hsa-miR-122-5p	SCN4B
hsa-miR-122-5p	AKAP5
hsa-miR-122-5p	CDC42EP3
hsa-miR-122-5p	MOB3B
hsa-miR-122-5p	CCDC170
hsa-miR-122-5p	SERAC1
hsa-miR-122-5p	ST3GAL1
hsa-miR-122-5p	ZNF106
hsa-miR-122-5p	ADM2
hsa-miR-122-5p	SLC25A33
hsa-miR-122-5p	CDKL1
hsa-miR-122-5p	TLCD4
hsa-miR-122-5p	SMAD1
hsa-miR-122-5p	KCNJ2
hsa-miR-122-5p	LATS2
hsa-miR-122-5p	CYP1B1
hsa-miR-122-5p	MMD
hsa-miR-122-5p	TIMP3
hsa-miR-122-5p	NFIB
hsa-miR-122-5p	SOX4
hsa-miR-122-5p	CASP3
hsa-miR-122-5p	TP53
hsa-miR-122-5p	TGFBR1
hsa-miR-122-5p	GATA6
hsa-miR-122-5p	CCNJ
hsa-miR-122-5p	ACSL4
hsa-miR-122-5p	GABRE
hsa-miR-122-5p	GBP2
hsa-miR-122-5p	GFRA1
hsa-miR-122-5p	IL1R1
hsa-miR-122-5p	IL7R
hsa-miR-122-5p	IL12A
hsa-miR-122-5p	ITGB8
hsa-miR-122-5p	LAMA5
hsa-miR-122-5p	MAP2
hsa-miR-122-5p	OXTR
hsa-miR-122-5p	PLAT
hsa-miR-155-5p	TM6SF1
hsa-miR-155-5p	SOCS1
hsa-miR-155-5p	SMAD1
hsa-miR-155-5p	THBS1
hsa-miR-155-5p	VCAM1
hsa-miR-155-5p	CASP3
hsa-miR-155-5p	ICAM1
hsa-miR-155-5p	ASNS
hsa-miR-155-5p	EDN1
hsa-miR-155-5p	FGF7
hsa-miR-155-5p	NFE2L2
hsa-miR-155-5p	OLR1
hsa-miR-155-5p	PLS1
hsa-miR-155-5p	PRKCI
hsa-miR-155-5p	CCL2
hsa-miR-155-5p	AURKA
hsa-miR-155-5p	CLDN1
hsa-miR-155-5p	FGL2
hsa-miR-155-5p	PALLD
hsa-miR-155-5p	TRAM1
hsa-miR-155-5p	PSAT1
hsa-miR-155-5p	KLHL5
hsa-miR-155-5p	RAB23
hsa-miR-155-5p	ARL15
hsa-miR-155-5p	TWSG1
hsa-miR-155-5p	GLIPR2
hsa-miR-155-5p	MBLAC2
hsa-miR-155-5p	ARL5B
hsa-miR-155-5p	S1PR1
hsa-miR-155-5p	RASSF4
hsa-miR-155-5p	CCN1
hsa-miR-155-5p	MTARC1
hsa-miR-155-5p	MAP3K14
hsa-miR-155-5p	LATS2
hsa-miR-155-5p	CYP1B1
hsa-miR-155-5p	ZFP36L2
hsa-miR-155-5p	MMD
hsa-miR-155-5p	TIMP3
hsa-miR-155-5p	SDC4
hsa-miR-155-5p	STOM
hsa-miR-155-5p	NFIB
hsa-miR-155-5p	SOX4
hsa-miR-155-5p	TGFB2
hsa-miR-155-5p	LITAF
hsa-miR-155-5p	TNFRSF21
hsa-miR-155-5p	RECK
hsa-miR-155-5p	LIF
hsa-miR-155-5p	RUNX1T1
hsa-miR-155-5p	CD274
hsa-miR-155-5p	RASGRP1
hsa-miR-155-5p	TP53
hsa-miR-155-5p	CTSC
hsa-miR-155-5p	CDH11
hsa-miR-155-5p	TGFBR1
hsa-miR-155-5p	CFH
hsa-miR-155-5p	RAB11FIP1
hsa-miR-155-5p	CCNJ
hsa-miR-155-5p	SULF1
hsa-miR-155-5p	BIRC3
hsa-miR-155-5p	RND3
hsa-miR-155-5p	ATF3
hsa-miR-155-5p	KLF5
hsa-miR-155-5p	C1S
hsa-miR-155-5p	CDKN2B
hsa-miR-155-5p	EPAS1
hsa-miR-155-5p	F3
hsa-miR-155-5p	ACSL4
hsa-miR-155-5p	FGF9
hsa-miR-155-5p	FHL1
hsa-miR-155-5p	GAS1
hsa-miR-155-5p	GBP2
hsa-miR-155-5p	HHEX
hsa-miR-155-5p	IL7R
hsa-miR-155-5p	ITGB8
hsa-miR-155-5p	LAMA3
hsa-miR-155-5p	LIFR
hsa-miR-155-5p	MDM2
hsa-miR-155-5p	NEDD9
hsa-miR-155-5p	NNMT
hsa-miR-155-5p	ROR1
hsa-miR-155-5p	PDGFRA
hsa-miR-155-5p	PLD1
hsa-miR-155-5p	PMAIP1
hsa-miR-155-5p	PMP22
hsa-miR-155-5p	PTHLH
hsa-miR-155-5p	PTX3
hsa-miR-155-5p	PVR
hsa-miR-155-5p	RELB
hsa-miR-155-5p	SLC7A2
hsa-miR-155-5p	TEK
hsa-miR-155-5p	TFRC
hsa-miR-155-5p	TLR1
hsa-miR-155-5p	TPD52L1
hsa-miR-155-5p	TRPC4
hsa-miR-155-5p	UGCG
hsa-miR-155-5p	UCK2
hsa-miR-155-5p	ZFAND5
hsa-miR-155-5p	ENC1
hsa-miR-155-5p	GAS7
hsa-miR-155-5p	TRPA1
hsa-miR-155-5p	STK17B
hsa-miR-155-5p	BAG2
hsa-miR-155-5p	CREB5
hsa-miR-155-5p	URB2
hsa-miR-155-5p	FRY
hsa-miR-155-5p	CDC42EP3
hsa-miR-155-5p	PLK2
hsa-miR-155-5p	DNAJB4
hsa-miR-155-5p	RHOBTB3
hsa-miR-155-5p	PDZD2
hsa-miR-155-5p	SEL1L3
hsa-miR-155-5p	LRRC8B
hsa-miR-155-5p	IPCEF1
hsa-miR-155-5p	LACTB2
hsa-miR-155-5p	CHST15
hsa-miR-155-5p	BNC2
hsa-miR-155-5p	ELOVL2
hsa-miR-155-5p	SLFN12
hsa-miR-155-5p	DRAM1
hsa-miR-155-5p	SULF2
hsa-miR-155-5p	EIF5A2
hsa-miR-155-5p	ENTPD7
hsa-miR-155-5p	HEG1
hsa-miR-155-5p	NTN4
hsa-miR-155-5p	MOB3B
hsa-miR-155-5p	LBH
hsa-miR-155-5p	TMTC1
hsa-miR-155-5p	ARID5B
hsa-miR-155-5p	MAK16
hsa-miR-155-5p	C1orf198
hsa-miR-155-5p	PHLDB2
hsa-miR-155-5p	ARRDC4
hsa-miR-155-5p	MARS2
hsa-miR-155-5p	EPSTI1
hsa-miR-155-5p	SNX18
hsa-miR-155-5p	CPEB2
hsa-miR-155-5p	TMTC2
hsa-miR-155-5p	SGMS2
hsa-miR-155-5p	OLFML2A
hsa-miR-155-5p	MKX
hsa-miR-155-5p	LURAP1L
hsa-miR-155-5p	SAMD12
hsa-miR-155-5p	KLHL23
hsa-miR-155-5p	HGF
hsa-miR-155-5p	ALAS1
hsa-miR-155-5p	ALDH1B1
hsa-miR-155-5p	DIO2
hsa-miR-155-5p	ZNF121
hsa-miR-155-5p	NRCAM
hsa-miR-155-5p	CYFIP2
hsa-miR-155-5p	EFEMP1
hsa-miR-155-5p	TNFAIP8
hsa-miR-155-5p	BICC1
hsa-miR-155-5p	SLFN11
hsa-miR-155-5p	METTL21A
hsa-miR-155-5p	POSTN
hsa-miR-155-5p	IL16
hsa-miR-155-5p	BMP4
hsa-miR-155-5p	NCR3LG1
hsa-miR-155-5p	AKR1C1
hsa-miR-155-5p	PRSS12
hsa-miR-155-5p	S1PR2
hsa-miR-155-5p	FAP
hsa-miR-155-5p	S1PR3
hsa-miR-155-5p	TSPAN2
hsa-miR-155-5p	FBLN1
hsa-miR-155-5p	TNFAIP6
hsa-miR-155-5p	COL14A1
hsa-miR-155-5p	PIEZO2
hsa-miR-155-5p	CCDC80
hsa-miR-155-5p	ACTG2
hsa-miR-155-5p	PLPP3
hsa-miR-155-5p	TXNIP
hsa-miR-155-5p	GUCY1A1
hsa-miR-155-5p	GUCY1B1
hsa-miR-155-5p	DIPK1A
hsa-miR-155-5p	SQOR
hsa-miR-155-5p	CCN2
hsa-miR-155-5p	WARS1
hsa-miR-657	THBS1
hsa-miR-657	SCN4B
hsa-miR-657	TSPAN6
hsa-miR-657	PRELP
hsa-miR-765	KCNH2
hsa-miR-765	RECK
hsa-miR-765	GATA6
hsa-miR-765	ARRB1
hsa-miR-765	CPE
hsa-miR-765	GPRC5A
hsa-miR-765	HES6
hsa-miR-765	EIF5A2
hsa-miR-765	NXN
hsa-miR-765	NUAK2
hsa-miR-765	UNC5B
hsa-miR-765	GXYLT2
hsa-miR-99a-5p	HOXA1
hsa-miR-99a-5p	GRHL1
hsa-miR-99a-5p	LRIG3
hsa-miR-99a-5p	FAM171B
Downregulated miRNA in VMC_100k, Upregulated mRNA targets in Fibroblast (MRC5) treated with these EVs
miRNA	mRNA
hsa-let-7e-5p	SLC5A3
hsa-let-7e-5p	RRM2
hsa-let-7e-5p	PRIM1
hsa-let-7e-5p	PKMYT1
hsa-let-7e-5p	NPTX1
hsa-let-7e-5p	NEMP1
hsa-let-7e-5p	NCEH1
hsa-let-7e-5p	SLC16A3
hsa-let-7e-5p	KIFC1
hsa-let-7e-5p	ITGA6
hsa-let-7e-5p	EZH2
hsa-let-7e-5p	MT-CO2
hsa-let-7e-5p	NCAPG2
hsa-let-7e-5p	CD68
hsa-let-7e-5p	AURKB
hsa-let-7e-5p	PLK1
hsa-let-7e-5p	ACTA1
hsa-let-7e-5p	AK4
hsa-let-7e-5p	CLDN4
hsa-let-7e-5p	MKI67
hsa-let-7e-5p	PDGFB
hsa-let-7e-5p	POLD1
hsa-let-7e-5p	ESPL1
hsa-let-7e-5p	SEMA4B
hsa-let-7e-5p	RACGAP1
hsa-let-7e-5p	CDCA3
hsa-let-7e-5p	PGM2L1
hsa-let-7e-5p	DNA2
hsa-let-7e-5p	CDH18
hsa-let-7e-5p	RAI2
hsa-let-7e-5p	ICOSLG
hsa-let-7e-5p	TMEM107
hsa-let-7e-5p	MT-ND3
hsa-let-7e-5p	MT-ND4
hsa-let-7e-5p	MT-ND1
hsa-let-7e-5p	MT-ND2
hsa-let-7e-5p	MT-ND5
hsa-let-7e-5p	MT-ATP6
hsa-let-7e-5p	ERO1A
hsa-let-7e-5p	H2BC18
hsa-let-7e-5p	HASPIN
hsa-let-7e-5p	H2BC5
hsa-let-7e-5p	PLCXD1
hsa-let-7e-5p	CENPP
hsa-let-7e-5p	HES1
hsa-let-7e-5p	MAFB
hsa-let-7e-5p	TTK
hsa-let-7e-5p	PGF
hsa-let-7e-5p	LMNB1
hsa-let-7e-5p	VEGFA
hsa-let-7e-5p	GYS1
hsa-let-7e-5p	EFNA3
hsa-let-7e-5p	DHFR
hsa-let-7e-5p	PPP1R13L
hsa-let-7e-5p	PODXL
hsa-let-7e-5p	PLP2
hsa-let-7e-5p	DEPDC1
hsa-let-7e-5p	PRC1
hsa-let-7e-5p	INSIG2
hsa-let-7e-5p	CENPF
hsa-let-7e-5p	GPSM2
hsa-let-7e-5p	PBK
hsa-let-7e-5p	KIF23
hsa-let-7e-5p	CENPJ
hsa-let-7e-5p	HOMER2
hsa-let-7e-5p	ID1
hsa-let-7e-5p	RBL1
hsa-let-7e-5p	BRCA2
hsa-let-7e-5p	BRCA1
hsa-let-7e-5p	PRDM1
hsa-let-7e-5p	KIF1A
hsa-let-7e-5p	PTGS2
hsa-let-7e-5p	MMP16
hsa-let-7e-5p	TYMS
hsa-let-7e-5p	DTL
hsa-let-7e-5p	MAP2K1
hsa-let-7e-5p	FOS
hsa-let-7e-5p	DDIT4
hsa-let-7e-5p	CCNA2
hsa-let-7e-5p	CDCA5
hsa-let-7e-5p	NR4A2
hsa-let-7e-5p	FGFR3
hsa-let-7e-5p	FANCD2
hsa-let-7e-5p	CDKN3
hsa-let-7e-5p	MCM10
hsa-let-7e-5p	POLE2
hsa-let-7e-5p	KIF22
hsa-let-7e-5p	TIMELESS
hsa-let-7e-5p	BMF
hsa-let-7e-5p	ERRFI1
hsa-let-7e-5p	E2F2
hsa-let-7e-5p	FEN1
hsa-let-7e-5p	MMP1
hsa-let-7e-5p	CDK2
hsa-let-7e-5p	KRT7
hsa-let-7e-5p	DUSP2
hsa-let-7e-5p	NCAM1
hsa-let-7e-5p	ABCA3
hsa-let-7e-5p	ADAM8
hsa-let-7e-5p	AREG
hsa-let-7e-5p	BLM
hsa-let-7e-5p	BNIP3
hsa-let-7e-5p	BUB1
hsa-let-7e-5p	BUB1B
hsa-let-7e-5p	CACNA1B
hsa-let-7e-5p	CACNB4
hsa-let-7e-5p	CCNB1
hsa-let-7e-5p	CCNF
hsa-let-7e-5p	CDC6
hsa-let-7e-5p	CDC20
hsa-let-7e-5p	CDKN2C
hsa-let-7e-5p	CENPE
hsa-let-7e-5p	CKS2
hsa-let-7e-5p	CLDN7
hsa-let-7e-5p	CPT1B
hsa-let-7e-5p	SLC25A10
hsa-let-7e-5p	EPHA5
hsa-let-7e-5p	EPOR
hsa-let-7e-5p	FANCA
hsa-let-7e-5p	FANCG
hsa-let-7e-5p	FGF11
hsa-let-7e-5p	FKBP1B
hsa-let-7e-5p	FOXD1
hsa-let-7e-5p	FOXM1
hsa-let-7e-5p	CENPI
hsa-let-7e-5p	GRIN2D
hsa-let-7e-5p	HELLS
hsa-let-7e-5p	HK2
hsa-let-7e-5p	HMGB2
hsa-let-7e-5p	HMGN2
hsa-let-7e-5p	HMMR
hsa-let-7e-5p	HMOX1
hsa-let-7e-5p	NR4A1
hsa-let-7e-5p	HTR1A
hsa-let-7e-5p	ID4
hsa-let-7e-5p	INCENP
hsa-let-7e-5p	ITGA2
hsa-let-7e-5p	ITGA9
hsa-let-7e-5p	KCNF1
hsa-let-7e-5p	KCNN4
hsa-let-7e-5p	KIF5A
hsa-let-7e-5p	KIF11
hsa-let-7e-5p	LIG1
hsa-let-7e-5p	MAD2L1
hsa-let-7e-5p	SMAD6
hsa-let-7e-5p	SMAD7
hsa-let-7e-5p	SMAD9
hsa-let-7e-5p	MCM2
hsa-let-7e-5p	MCM3
hsa-let-7e-5p	MCM4
hsa-let-7e-5p	MCM5
hsa-let-7e-5p	MEF2C
hsa-let-7e-5p	MPP2
hsa-let-7e-5p	MXI1
hsa-let-7e-5p	MYBL2
hsa-let-7e-5p	NAIP
hsa-let-7e-5p	NEFH
hsa-let-7e-5p	NEK2
hsa-let-7e-5p	NFATC2
hsa-let-7e-5p	NPC1
hsa-let-7e-5p	NTSR1
hsa-let-7e-5p	ODC1
hsa-let-7e-5p	ORC1
hsa-let-7e-5p	PCNT
hsa-let-7e-5p	PDE2A
hsa-let-7e-5p	PDK1
hsa-let-7e-5p	PFKFB3
hsa-let-7e-5p	PFKFB4
hsa-let-7e-5p	SERPINI1
hsa-let-7e-5p	PIGA
hsa-let-7e-5p	PLXNA2
hsa-let-7e-5p	POLE
hsa-let-7e-5p	PPP2R2C
hsa-let-7e-5p	PKIA
hsa-let-7e-5p	PTPRB
hsa-let-7e-5p	PTPRR
hsa-let-7e-5p	RFC3
hsa-let-7e-5p	RORA
hsa-let-7e-5p	SHMT1
hsa-let-7e-5p	STIL
hsa-let-7e-5p	SLC6A6
hsa-let-7e-5p	SNAI1
hsa-let-7e-5p	ABCC8
hsa-let-7e-5p	SUV39H1
hsa-let-7e-5p	SYN1
hsa-let-7e-5p	TBX5
hsa-let-7e-5p	TBX3
hsa-let-7e-5p	TCF7
hsa-let-7e-5p	TG
hsa-let-7e-5p	THBD
hsa-let-7e-5p	TK1
hsa-let-7e-5p	TMPO
hsa-let-7e-5p	TOP2A
hsa-let-7e-5p	TPBG
hsa-let-7e-5p	UPP1
hsa-let-7e-5p	VEGFC
hsa-let-7e-5p	WNT7B
hsa-let-7e-5p	XRCC2
hsa-let-7e-5p	ZNF85
hsa-let-7e-5p	TFPI2
hsa-let-7e-5p	FZD8
hsa-let-7e-5p	PPFIA4
hsa-let-7e-5p	BHLHE40
hsa-let-7e-5p	SAP30
hsa-let-7e-5p	SOCS2
hsa-let-7e-5p	BSN
hsa-let-7e-5p	INA
hsa-let-7e-5p	EXO1
hsa-let-7e-5p	TRIP13
hsa-let-7e-5p	RECQL4
hsa-let-7e-5p	SLC4A8
hsa-let-7e-5p	RPH3AL
hsa-let-7e-5p	GAL3ST1
hsa-let-7e-5p	NR1D1
hsa-let-7e-5p	KIF20B
hsa-let-7e-5p	KNTC1
hsa-let-7e-5p	DLGAP5
hsa-let-7e-5p	ARHGAP11A
hsa-let-7e-5p	GINS1
hsa-let-7e-5p	NCAPD2
hsa-let-7e-5p	KIF14
hsa-let-7e-5p	CLEC2B
hsa-let-7e-5p	HDAC5
hsa-let-7e-5p	TROAP
hsa-let-7e-5p	CHAF1A
hsa-let-7e-5p	SMC4
hsa-let-7e-5p	KIF20A
hsa-let-7e-5p	DDX39A
hsa-let-7e-5p	TRAIP
hsa-let-7e-5p	KLF2
hsa-let-7e-5p	NDRG1
hsa-let-7e-5p	NDC80
hsa-let-7e-5p	TACC3
hsa-let-7e-5p	DRAP1
hsa-let-7e-5p	SMC2
hsa-let-7e-5p	TNFSF13B
hsa-let-7e-5p	POLQ
hsa-let-7e-5p	PLK4
hsa-let-7e-5p	CHL1
hsa-let-7e-5p	CNTRL
hsa-let-7e-5p	UBE2C
hsa-let-7e-5p	RAPGEF4
hsa-let-7e-5p	CIT
hsa-let-7e-5p	TBC1D8
hsa-let-7e-5p	DUSP10
hsa-let-7e-5p	OIP5
hsa-let-7e-5p	UNC13A
hsa-let-7e-5p	NMNAT2
hsa-let-7e-5p	KDM4C
hsa-let-7e-5p	DDN
hsa-let-7e-5p	SYNE2
hsa-let-7e-5p	DNAJC9
hsa-let-7e-5p	TBC1D30
hsa-let-7e-5p	NCAPH
hsa-let-7e-5p	ORC6
hsa-let-7e-5p	POLA2
hsa-let-7e-5p	KIF4A
hsa-let-7e-5p	RAD54B
hsa-let-7e-5p	MPC2
hsa-let-7e-5p	PITPNC1
hsa-let-7e-5p	KLHL3
hsa-let-7e-5p	FBXO5
hsa-let-7e-5p	EHF
hsa-let-7e-5p	PPP1R14B
hsa-let-7e-5p	PLEK2
hsa-let-7e-5p	CKAP2
hsa-let-7e-5p	HSPB7
hsa-let-7e-5p	ATAD2
hsa-let-7e-5p	PSMC3IP
hsa-let-7e-5p	IL21R
hsa-let-7e-5p	CDON
hsa-let-7e-5p	GMNN
hsa-let-7e-5p	DDX41
hsa-let-7e-5p	MTFP1
hsa-let-7e-5p	RASD1
hsa-let-7e-5p	GINS2
hsa-let-7e-5p	ANLN
hsa-let-7e-5p	EGLN1
hsa-let-7e-5p	ERCC6L
hsa-let-7e-5p	SPDL1
hsa-let-7e-5p	ANKZF1
hsa-let-7e-5p	CDCA8
hsa-let-7e-5p	CEP55
hsa-let-7e-5p	FANCI
hsa-let-7e-5p	NEIL3
hsa-let-7e-5p	MIS18BP1
hsa-let-7e-5p	AGPAT5
hsa-let-7e-5p	ASF1B
hsa-let-7e-5p	PRR11
hsa-let-7e-5p	DEPDC1B
hsa-let-7e-5p	PAG1
hsa-let-7e-5p	CENPN
hsa-let-7e-5p	ZNF395
hsa-let-7e-5p	PCDHGC4
hsa-let-7e-5p	CYP26B1
hsa-let-7e-5p	PRDM8
hsa-let-7e-5p	KIF15
hsa-let-7e-5p	ZMIZ1
hsa-let-7e-5p	ATP10A
hsa-let-7e-5p	HECW2
hsa-let-7e-5p	ALPK3
hsa-let-7e-5p	CARNS1
hsa-let-7e-5p	RRAGD
hsa-let-7e-5p	CHTF18
hsa-let-7e-5p	ZNF667
hsa-let-7e-5p	CLSPN
hsa-let-7e-5p	CENPK
hsa-let-7e-5p	NCAPG
hsa-let-7e-5p	GINS3
hsa-let-7e-5p	BCL11B
hsa-miR-107	VEGFA
hsa-miR-107	KIF23
hsa-miR-107	CDK1
hsa-miR-107	ITGA2
hsa-miR-107	SMAD7
hsa-miR-107	MCM7
hsa-miR-107	RAD51
hsa-miR-107	TK1
hsa-miR-107	RACGAP1
hsa-miR-107	MIS18BP1
hsa-miR-107	DEPDC1B
hsa-miR-107	PAG1
hsa-miR-107	GABRB1
hsa-miR-125a-5p	VEGFA
hsa-miR-125a-5p	PRC1
hsa-miR-125a-5p	PRDM1
hsa-miR-125a-5p	HK2
hsa-miR-125a-5p	HDAC5
hsa-miR-125a-5p	SEMA4B
hsa-miR-125a-5p	SMC2
hsa-miR-125a-5p	E2F7
hsa-miR-125a-5p	XIRP1
hsa-miR-125a-5p	DLL4
hsa-miR-125a-5p	CENPP
hsa-miR-125b-5p	AURKB
hsa-miR-125b-5p	HOMER2
hsa-miR-125b-5p	ID2
hsa-miR-125b-5p	ID3
hsa-miR-125b-5p	ID1
hsa-miR-125b-5p	BMF
hsa-miR-125b-5p	CDC25C
hsa-miR-125b-5p	PODXL
hsa-miR-125b-5p	PRDM1
hsa-miR-125b-5p	KRT7
hsa-miR-125b-5p	CCNB1
hsa-miR-125b-5p	CDK1
hsa-miR-125b-5p	CDKN2D
hsa-miR-125b-5p	EPOR
hsa-miR-125b-5p	HK2
hsa-miR-125b-5p	KCNS3
hsa-miR-125b-5p	SUV39H1
hsa-miR-125b-5p	SEMA4B
hsa-miR-125b-5p	SMC2
hsa-miR-125b-5p	ZNF395
hsa-miR-125b-5p	E2F7
hsa-miR-125b-5p	KIF24
hsa-miR-125b-5p	SCNN1A
hsa-miR-125b-5p	RNASEH2A
hsa-miR-125b-5p	APLN
hsa-miR-125b-5p	E2F2
hsa-miR-125b-5p	H2BC18
hsa-miR-125b-5p	SHMT1
hsa-miR-125b-5p	H4C1
hsa-miR-125b-5p	CENPP
hsa-miR-196a-5p	NEMP1
hsa-miR-196a-5p	CKAP2L
hsa-miR-196a-5p	TYMS
hsa-miR-196a-5p	BUB1
hsa-miR-196a-5p	HMOX1
hsa-miR-196a-5p	NR4A1
hsa-miR-196a-5p	MPP2
hsa-miR-196a-5p	ESPL1
hsa-miR-196a-5p	UBE2C
hsa-miR-196a-5p	E2F7
hsa-miR-196a-5p	MMS22L
hsa-miR-196a-5p	KIF18B
hsa-miR-196a-5p	MT-ND4
hsa-miR-196a-5p	MT-ND5
hsa-miR-196a-5p	MT-ATP6
hsa-miR-196a-5p	H2BC5
hsa-miR-196a-5p	H2BC3
