# Supplementary material
Source: Research Square preprint supplement (doi:10.21203/rs.3.rs-9648282/v1)
Supplement: Supplementary file 2 [file 1bf8795fe8241d2a8e4f6a45.pdf]

# Figure S1

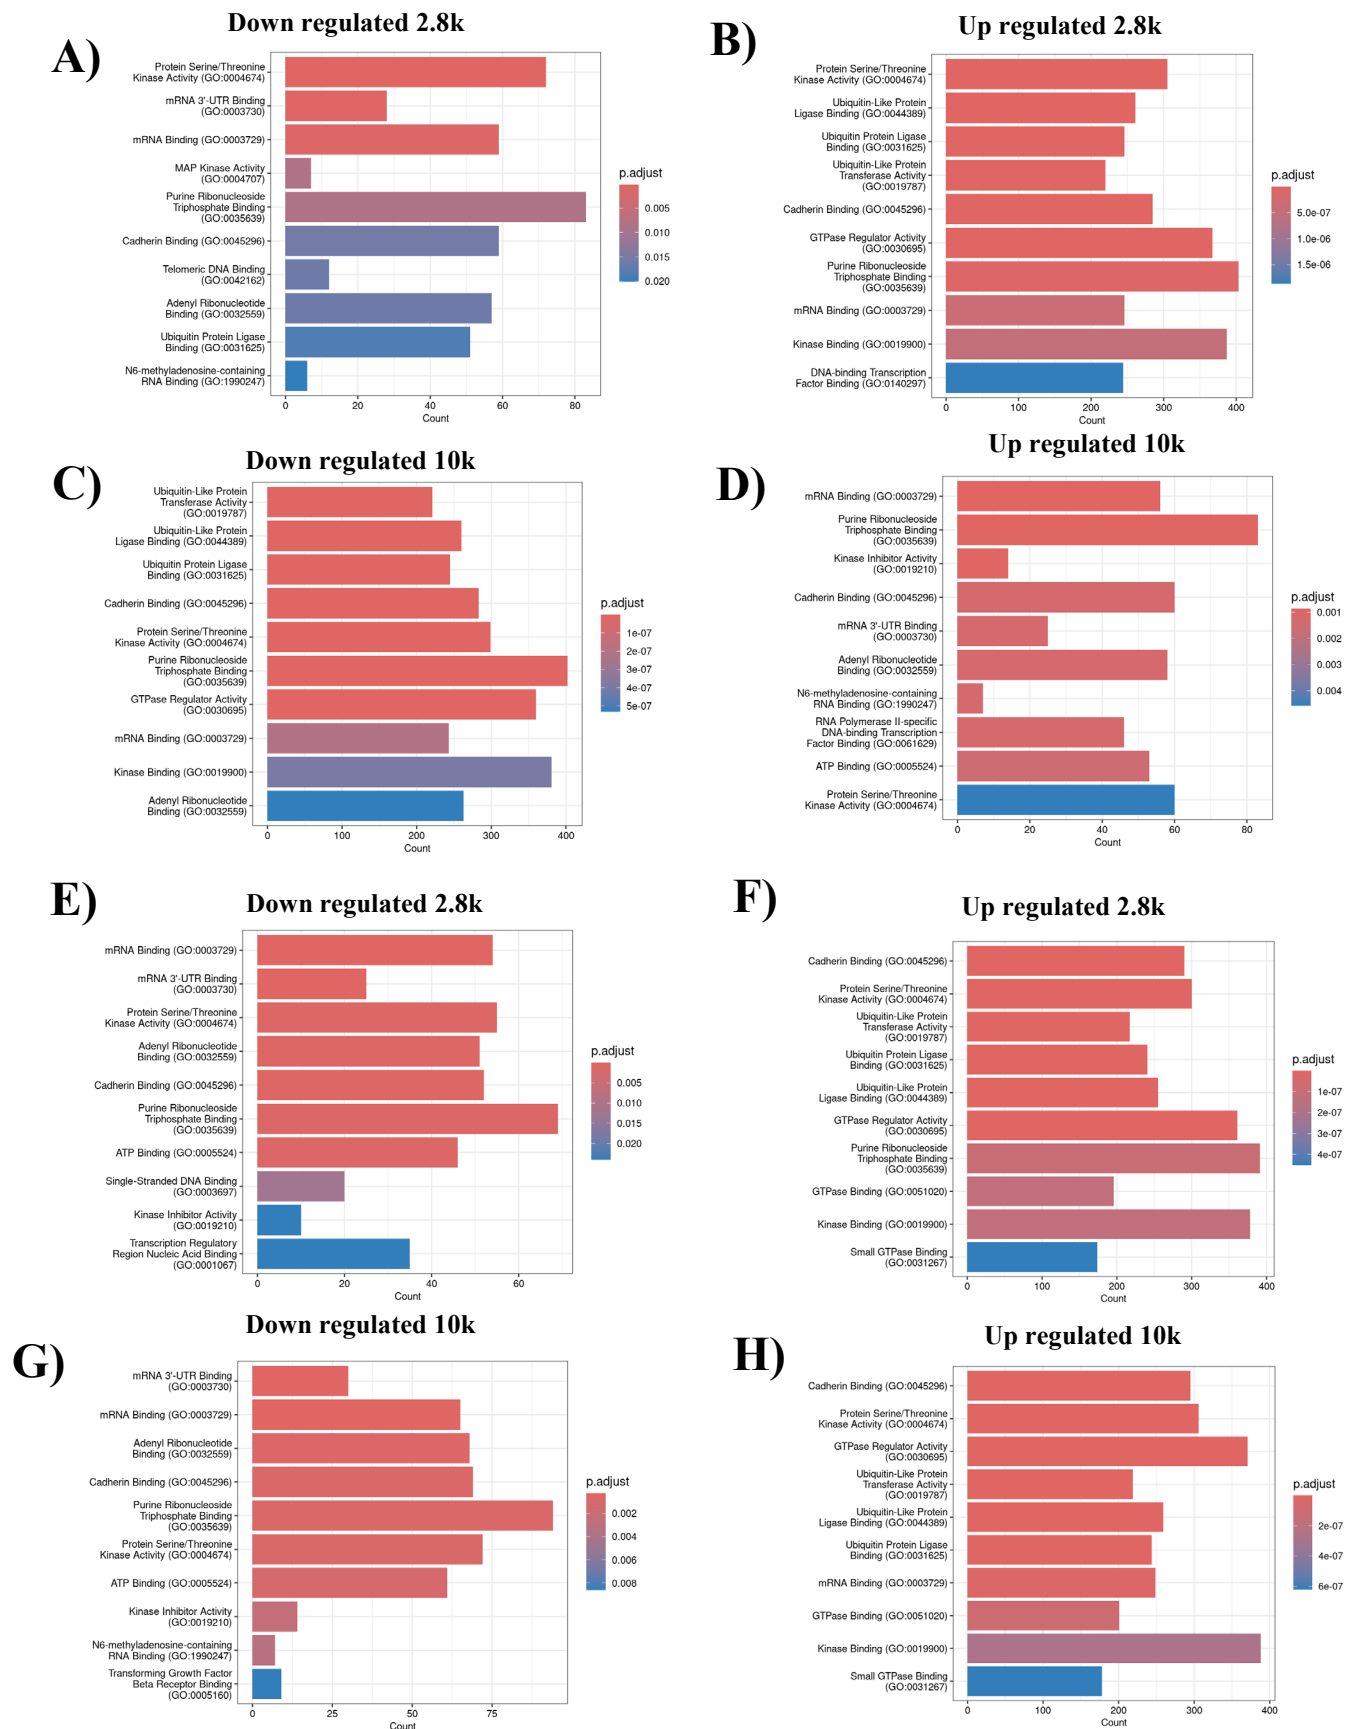

**Fig S1: (A-D)** Gene set enrichment analysis (GSEA) analysis for the gene targets for the top 10 up-/downregulated miRNAs identified through differential expression analysis between Met5A EV subpopulations and VMC23 EV subpopulations.

**(E-H)** Gene set enrichment analysis (GSEA) analysis for the gene targets for the top 10 up-/downregulated miRNAs identified through differential expression analysis between Met5A EV subpopulations and MSTO EV subpopulations.
