# Supplementary material
Source: Research Square preprint supplement (doi:10.21203/rs.3.rs-9648282/v1)
Supplement: Supplementary file 2 [file 7fab03954510dd40ef34969e.xlsx]

## Sheet: Summary
miRNA cargo from pleural mesothelioma-derived extracellular vesicles reprograms fibroblasts to cancer associated phenotype
Vivek Dharwal1,3, Winston Lay1, Richard Zelei1,3, Ali Azimi 7,8, Lucy Wang1, Tim Huang6, Ling Zhuang1, Georges Grau3, Stephen Clarke3, Steven Kao1,5, Fatemeh Vafaee4,6, Zaklina Kovacevic2, Elham Hosseini-Beheshti1,3,9
Table
Table S1. List of miRNA found in EV fractions from Met5A, VMC23, and MSTO cells
Table S2. Differential miRNA Expression: Met5a_2.8k vs MSTO_2.8k
Table S3. Differential miRNA Expression: Met5a_10k vs MSTO_10k
Table S4. Differential miRNA Expression: Met5a_100k vs MSTO_100k
Table S5. Differential miRNA Expression: Met5a_2.8k vs VMC23_2.8k
Table S6. Differential miRNA Expression: Met5a_10k vs VMC23_10k
Table S7 Differential miRNA Expression: Met5a_100k vs VMC23_100k
Table S8 – GO Molecular Function for mRNA Targets of Top 10 Up‑regulated miRNAs (Met5a_2.8k vs MSTO_2.8k)
Table S9 – GO Molecular Function for mRNA Targets of Top 10 Down‑regulated miRNAs (Met5a_2.8k vs MSTO_2.8k)
Table S10 – GO Molecular Function for mRNA Targets of Top 10 Up‑regulated miRNAs (Met5a_10k vs MSTO_10k)
Table S11 – GO Molecular Function for mRNA Targets of Top 10 Down‑regulated miRNAs (Met5a_10k vs MSTO_10k)
Table S12 – GO Molecular Function for mRNA Targets of Top 10 Up‑regulated miRNAs (Met5a_100k vs MSTO_100k)
Table S13 – GO Molecular Function for mRNA Targets of Top 10 Down‑regulated miRNAs (Met5a_100k vs MSTO_100k)
Table S14 – GO Molecular Function for mRNA Targets of Top 10 Up‑regulated miRNAs (Met5a_2.8k vs VMC23_2.8k)
Table S15 – GO Molecular Function for mRNA Targets of Top 10 Down‑regulated miRNAs (Met5a_2.8k vs VMC23_2.8k)
Table S16 – GO Molecular Function for mRNA Targets of Top 10 Up‑regulated miRNAs (Met5a_10k vs VMC23_10k)
Table S17 – GO Molecular Function for mRNA Targets of Top 10 Down‑regulated miRNAs (Met5a_10k vs VMC23_10k)
Table S18 – GO Molecular Function for mRNA Targets of Top 10 Up‑regulated miRNAs (Met5a_100k vs VMC23_100k)
Table S19 – GO Molecular Function for mRNA Targets of Top 10 Down‑regulated miRNAs (Met5a_100k vs VMC23_100k)
Table S20 miRNA_Seq_summary

## Sheet: Table S1
Table S1. List of miRNA found in EV fractions from Met5A, VMC23, and MSTO cells
	Met5a 2.8k	Met5a 10k	Met5a 100k	VMC23 2.8k	VMC23 10k	VMC23 100k	MSTO 2.8k	MSTO 10k	MSTO 100k
	hsa.let.7a.5p	hsa.let.7a.5p	hsa.let.7a.5p	hsa.let.7a.5p	hsa.let.7a.5p	hsa.let.7a.5p	hsa.let.7a.5p	hsa.let.7a.5p	hsa.let.7a.5p
	hsa.let.7b.5p	hsa.let.7b.5p	hsa.let.7b.5p	hsa.let.7b.5p	hsa.let.7b.5p	hsa.let.7b.5p	hsa.let.7b.5p	hsa.let.7b.5p	hsa.let.7b.5p
	hsa.let.7c.5p	hsa.let.7c.5p	hsa.let.7c.5p	hsa.let.7c.5p	hsa.let.7c.5p	hsa.let.7c.5p	hsa.let.7c.5p	hsa.let.7c.5p	hsa.let.7c.5p
	hsa.let.7d.5p	hsa.let.7d.5p	hsa.let.7d.5p	hsa.let.7d.5p	hsa.let.7d.5p	hsa.let.7d.5p	hsa.let.7d.5p	hsa.let.7d.5p	hsa.let.7d.5p
	hsa.let.7e.5p	hsa.let.7e.5p	hsa.let.7e.5p	hsa.let.7e.5p	hsa.let.7e.5p	hsa.let.7e.5p	hsa.let.7e.5p	hsa.let.7e.5p	hsa.let.7e.5p
	hsa.let.7f.5p	hsa.let.7f.5p	hsa.let.7f.5p	hsa.let.7f.5p	hsa.let.7f.5p	hsa.let.7f.5p	hsa.let.7f.5p	hsa.let.7f.5p	hsa.let.7f.5p
	hsa.miR.16.5p	hsa.miR.16.5p	hsa.miR.16.5p	hsa.miR.16.5p	hsa.miR.16.5p	hsa.let.7f.2.3p	hsa.let.7f.2.3p	hsa.let.7f.2.3p	hsa.let.7f.2.3p
	hsa.miR.17.5p	hsa.miR.17.5p	hsa.miR.17.5p	hsa.miR.17.5p	hsa.miR.21.5p	hsa.miR.16.5p	hsa.miR.16.5p	hsa.miR.16.5p	hsa.miR.16.5p
	hsa.miR.20a.5p	hsa.miR.20a.5p	hsa.miR.20a.5p	hsa.miR.20a.5p	hsa.miR.22.5p	hsa.miR.21.5p	hsa.miR.17.5p	hsa.miR.17.5p	hsa.miR.17.5p
	hsa.miR.21.5p	hsa.miR.21.5p	hsa.miR.21.5p	hsa.miR.21.5p	hsa.miR.23a.5p	hsa.miR.22.5p	hsa.miR.20a.5p	hsa.miR.20a.5p	hsa.miR.20a.5p
	hsa.miR.22.5p	hsa.miR.22.5p	hsa.miR.22.5p	hsa.miR.22.5p	hsa.miR.23a.3p	hsa.miR.23a.3p	hsa.miR.21.5p	hsa.miR.21.5p	hsa.miR.21.5p
	hsa.miR.22.3p	hsa.miR.22.3p	hsa.miR.22.3p	hsa.miR.23a.5p	hsa.miR.24.3p	hsa.miR.26a.5p	hsa.miR.22.5p	hsa.miR.22.5p	hsa.miR.22.5p
	hsa.miR.23a.3p	hsa.miR.23a.3p	hsa.miR.23a.3p	hsa.miR.23a.3p	hsa.miR.25.5p	hsa.miR.27a.3p	hsa.miR.22.3p	hsa.miR.22.3p	hsa.miR.23a.5p
	hsa.miR.24.3p	hsa.miR.24.3p	hsa.miR.24.3p	hsa.miR.24.3p	hsa.miR.26a.5p	hsa.miR.28.3p	hsa.miR.23a.5p	hsa.miR.23a.5p	hsa.miR.23a.3p
	hsa.miR.25.5p	hsa.miR.25.5p	hsa.miR.25.5p	hsa.miR.26a.5p	hsa.miR.29a.3p	hsa.miR.29a.3p	hsa.miR.23a.3p	hsa.miR.23a.3p	hsa.miR.24.3p
	hsa.miR.26a.5p	hsa.miR.26a.5p	hsa.miR.26a.5p	hsa.miR.28.3p	hsa.miR.30a.5p	hsa.miR.30a.5p	hsa.miR.24.3p	hsa.miR.24.3p	hsa.miR.26a.5p
	hsa.miR.27a.3p	hsa.miR.27a.3p	hsa.miR.27a.3p	hsa.miR.29a.3p	hsa.miR.30a.3p	hsa.miR.30a.3p	hsa.miR.26a.5p	hsa.miR.25.5p	hsa.miR.27a.3p
	hsa.miR.28.3p	hsa.miR.28.3p	hsa.miR.28.3p	hsa.miR.30a.3p	hsa.miR.31.5p	hsa.miR.92a.3p	hsa.miR.27a.3p	hsa.miR.26a.5p	hsa.miR.28.3p
	hsa.miR.29a.3p	hsa.miR.29a.3p	hsa.miR.29a.3p	hsa.miR.31.5p	hsa.miR.92a.3p	hsa.miR.93.5p	hsa.miR.28.3p	hsa.miR.27a.3p	hsa.miR.29a.3p
	hsa.miR.30a.5p	hsa.miR.30a.5p	hsa.miR.30a.5p	hsa.miR.92a.3p	hsa.miR.93.5p	hsa.miR.98.5p	hsa.miR.29a.3p	hsa.miR.28.3p	hsa.miR.30a.5p
	hsa.miR.30a.3p	hsa.miR.30a.3p	hsa.miR.30a.3p	hsa.miR.93.5p	hsa.miR.98.5p	hsa.miR.99a.5p	hsa.miR.30a.3p	hsa.miR.29a.3p	hsa.miR.30a.3p
	hsa.miR.31.5p	hsa.miR.31.5p	hsa.miR.31.5p	hsa.miR.98.5p	hsa.miR.100.5p	hsa.miR.100.5p	hsa.miR.31.5p	hsa.miR.30a.5p	hsa.miR.31.5p
	hsa.miR.92a.3p	hsa.miR.92a.3p	hsa.miR.92a.3p	hsa.miR.99a.5p	hsa.miR.29b.3p	hsa.miR.29b.3p	hsa.miR.92a.3p	hsa.miR.30a.3p	hsa.miR.92a.3p
	hsa.miR.93.5p	hsa.miR.93.5p	hsa.miR.93.5p	hsa.miR.100.5p	hsa.miR.103a.3p	hsa.miR.103a.3p	hsa.miR.93.5p	hsa.miR.31.5p	hsa.miR.93.5p
	hsa.miR.98.5p	hsa.miR.98.5p	hsa.miR.98.5p	hsa.miR.29b.3p	hsa.miR.107	hsa.miR.107	hsa.miR.98.5p	hsa.miR.92a.3p	hsa.miR.98.5p
	hsa.miR.99a.5p	hsa.miR.99a.5p	hsa.miR.99a.5p	hsa.miR.103a.3p	hsa.miR.7.5p	hsa.miR.197.3p	hsa.miR.99a.5p	hsa.miR.93.5p	hsa.miR.99a.5p
	hsa.miR.100.5p	hsa.miR.100.5p	hsa.miR.100.5p	hsa.miR.107	hsa.miR.10a.5p	hsa.miR.30c.5p	hsa.miR.100.5p	hsa.miR.98.5p	hsa.miR.100.5p
	hsa.miR.29b.3p	hsa.miR.29b.3p	hsa.miR.29b.3p	hsa.miR.197.3p	hsa.miR.34a.5p	hsa.miR.10a.5p	hsa.miR.29b.3p	hsa.miR.99a.5p	hsa.miR.29b.3p
	hsa.miR.103a.3p	hsa.miR.103a.3p	hsa.miR.103a.3p	hsa.miR.7.5p	hsa.miR.181a.5p	hsa.miR.34a.5p	hsa.miR.103a.3p	hsa.miR.100.5p	hsa.miR.103a.3p
	hsa.miR.107	hsa.miR.107	hsa.miR.107	hsa.miR.10a.5p	hsa.miR.181b.5p	hsa.miR.182.5p	hsa.miR.107	hsa.miR.29b.3p	hsa.miR.196a.5p
	hsa.miR.196a.5p	hsa.miR.196a.5p	hsa.miR.196a.5p	hsa.miR.34a.5p	hsa.miR.182.5p	hsa.miR.221.3p	hsa.miR.196a.5p	hsa.miR.103a.3p	hsa.miR.197.3p
	hsa.miR.197.3p	hsa.miR.197.3p	hsa.miR.197.3p	hsa.miR.181a.5p	hsa.miR.221.3p	hsa.let.7g.5p	hsa.miR.30c.5p	hsa.miR.107	hsa.miR.7.5p
	hsa.miR.30c.5p	hsa.miR.30c.5p	hsa.miR.30c.5p	hsa.miR.181b.5p	hsa.let.7g.5p	hsa.let.7i.5p	hsa.miR.7.5p	hsa.miR.196a.5p	hsa.miR.10a.5p
	hsa.miR.7.5p	hsa.miR.7.5p	hsa.miR.7.5p	hsa.miR.182.5p	hsa.let.7i.5p	hsa.miR.23b.3p	hsa.miR.10a.5p	hsa.miR.197.3p	hsa.miR.34a.5p
	hsa.miR.10a.5p	hsa.miR.10a.5p	hsa.miR.10a.5p	hsa.miR.221.3p	hsa.miR.15b.5p	hsa.miR.122.5p	hsa.miR.34a.5p	hsa.miR.30c.5p	hsa.miR.181a.5p
	hsa.miR.34a.5p	hsa.miR.34a.5p	hsa.miR.34a.5p	hsa.let.7g.5p	hsa.miR.23b.3p	hsa.miR.125b.5p	hsa.miR.181a.5p	hsa.miR.7.5p	hsa.miR.181b.5p
	hsa.miR.181a.5p	hsa.miR.181a.5p	hsa.miR.181a.5p	hsa.let.7i.5p	hsa.miR.122.5p	hsa.miR.130a.3p	hsa.miR.181b.5p	hsa.miR.10a.5p	hsa.miR.182.5p
	hsa.miR.181b.5p	hsa.miR.181b.5p	hsa.miR.181b.5p	hsa.miR.15b.5p	hsa.miR.125b.5p	hsa.miR.138.5p	hsa.miR.182.5p	hsa.miR.34a.5p	hsa.miR.221.3p
	hsa.miR.182.5p	hsa.miR.182.5p	hsa.miR.182.5p	hsa.miR.23b.3p	hsa.miR.130a.3p	hsa.miR.153.5p	hsa.miR.221.3p	hsa.miR.181a.5p	hsa.miR.224.5p
	hsa.miR.221.3p	hsa.miR.221.3p	hsa.miR.221.3p	hsa.miR.122.5p	hsa.miR.138.5p	hsa.miR.191.5p	hsa.miR.224.5p	hsa.miR.181b.5p	hsa.let.7g.5p
	hsa.miR.224.5p	hsa.miR.224.5p	hsa.miR.224.5p	hsa.miR.125b.5p	hsa.miR.153.5p	hsa.miR.126.3p	hsa.let.7g.5p	hsa.miR.182.5p	hsa.let.7i.5p
	hsa.let.7g.5p	hsa.let.7g.5p	hsa.let.7g.5p	hsa.miR.130a.3p	hsa.miR.191.5p	hsa.miR.127.3p	hsa.let.7i.5p	hsa.miR.221.3p	hsa.miR.15b.5p
	hsa.let.7i.5p	hsa.let.7i.5p	hsa.let.7i.5p	hsa.miR.138.5p	hsa.miR.125a.5p	hsa.miR.149.5p	hsa.miR.15b.5p	hsa.miR.224.5p	hsa.miR.23b.3p
	hsa.miR.15b.5p	hsa.miR.15b.5p	hsa.miR.15b.5p	hsa.miR.153.5p	hsa.miR.126.3p	hsa.miR.154.5p	hsa.miR.23b.3p	hsa.let.7g.5p	hsa.miR.122.5p
	hsa.miR.23b.3p	hsa.miR.23b.3p	hsa.miR.23b.3p	hsa.miR.191.5p	hsa.miR.127.3p	hsa.miR.185.5p	hsa.miR.122.5p	hsa.let.7i.5p	hsa.miR.130a.3p
	hsa.miR.122.5p	hsa.miR.122.5p	hsa.miR.122.5p	hsa.miR.125a.5p	hsa.miR.185.5p	hsa.miR.193a.5p	hsa.miR.125b.5p	hsa.miR.15b.5p	hsa.miR.142.3p
	hsa.miR.125b.5p	hsa.miR.125b.5p	hsa.miR.125b.5p	hsa.miR.126.3p	hsa.miR.193a.5p	hsa.miR.320a.3p	hsa.miR.130a.3p	hsa.miR.23b.3p	hsa.miR.143.3p
	hsa.miR.130a.3p	hsa.miR.130a.3p	hsa.miR.130a.3p	hsa.miR.127.3p	hsa.miR.320a.3p	hsa.miR.155.5p	hsa.miR.138.5p	hsa.miR.122.5p	hsa.miR.153.5p
	hsa.miR.138.5p	hsa.miR.138.5p	hsa.miR.138.5p	hsa.miR.149.5p	hsa.miR.155.5p	hsa.miR.99b.5p	hsa.miR.143.3p	hsa.miR.125b.5p	hsa.miR.191.5p
	hsa.miR.143.3p	hsa.miR.143.3p	hsa.miR.143.3p	hsa.miR.154.5p	hsa.miR.365a.5p	hsa.miR.30e.3p	hsa.miR.153.5p	hsa.miR.130a.3p	hsa.miR.126.3p
	hsa.miR.191.5p	hsa.miR.191.5p	hsa.miR.191.5p	hsa.miR.184	hsa.miR.365b.5p	hsa.miR.376c.3p	hsa.miR.191.5p	hsa.miR.138.5p	hsa.miR.127.3p
	hsa.miR.125a.5p	hsa.miR.125a.5p	hsa.miR.125a.5p	hsa.miR.185.5p	hsa.miR.369.5p	hsa.miR.369.5p	hsa.miR.125a.5p	hsa.miR.142.3p	hsa.miR.149.5p
	hsa.miR.126.3p	hsa.miR.126.3p	hsa.miR.126.3p	hsa.miR.193a.5p	hsa.miR.376a.3p	hsa.miR.376a.3p	hsa.miR.126.3p	hsa.miR.143.3p	hsa.miR.154.5p
	hsa.miR.127.3p	hsa.miR.127.3p	hsa.miR.127.3p	hsa.miR.320a.3p	hsa.miR.378a.3p	hsa.miR.378a.3p	hsa.miR.127.3p	hsa.miR.153.5p	hsa.miR.185.5p
	hsa.miR.149.5p	hsa.miR.149.5p	hsa.miR.149.5p	hsa.miR.155.5p	hsa.miR.382.5p	hsa.miR.382.5p	hsa.miR.149.5p	hsa.miR.191.5p	hsa.miR.193a.5p
	hsa.miR.184	hsa.miR.154.5p	hsa.miR.184	hsa.miR.99b.5p	hsa.miR.342.3p	hsa.miR.342.3p	hsa.miR.154.5p	hsa.miR.125a.5p	hsa.miR.320a.3p
	hsa.miR.185.5p	hsa.miR.184	hsa.miR.185.5p	hsa.miR.30e.3p	hsa.miR.151a.5p	hsa.miR.151a.5p	hsa.miR.184	hsa.miR.126.3p	hsa.miR.155.5p
	hsa.miR.193a.5p	hsa.miR.185.5p	hsa.miR.193a.5p	hsa.miR.376c.3p	hsa.miR.335.5p	hsa.miR.335.5p	hsa.miR.185.5p	hsa.miR.127.3p	hsa.miR.369.5p
	hsa.miR.320a.3p	hsa.miR.193a.5p	hsa.miR.320a.3p	hsa.miR.369.5p	hsa.miR.423.5p	hsa.miR.423.5p	hsa.miR.193a.5p	hsa.miR.149.5p	hsa.miR.376a.3p
	hsa.miR.155.5p	hsa.miR.320a.3p	hsa.miR.155.5p	hsa.miR.376a.3p	hsa.miR.483.5p	hsa.miR.483.5p	hsa.miR.320a.3p	hsa.miR.154.5p	hsa.miR.378a.3p
	hsa.miR.99b.5p	hsa.miR.155.5p	hsa.miR.99b.5p	hsa.miR.382.5p	hsa.miR.483.3p	hsa.miR.483.3p	hsa.miR.155.5p	hsa.miR.184	hsa.miR.382.5p
	hsa.miR.130b.3p	hsa.miR.99b.5p	hsa.miR.130b.3p	hsa.miR.342.3p	hsa.miR.432.5p	hsa.miR.485.5p	hsa.miR.99b.5p	hsa.miR.185.5p	hsa.miR.342.3p
	hsa.miR.30e.3p	hsa.miR.130b.3p	hsa.miR.30e.3p	hsa.miR.151a.5p	hsa.miR.532.3p	hsa.miR.493.3p	hsa.miR.130b.3p	hsa.miR.193a.5p	hsa.miR.151a.5p
	hsa.miR.365a.5p	hsa.miR.30e.3p	hsa.miR.369.5p	hsa.miR.335.5p	hsa.miR.92b.5p	hsa.miR.432.5p	hsa.miR.30e.3p	hsa.miR.320a.3p	hsa.miR.335.5p
	hsa.miR.376a.3p	hsa.miR.378a.3p	hsa.miR.378a.3p	hsa.miR.423.5p	hsa.miR.92b.3p	hsa.miR.525.3p	hsa.miR.365a.5p	hsa.miR.155.5p	hsa.miR.423.5p
	hsa.miR.378a.3p	hsa.miR.382.5p	hsa.miR.382.5p	hsa.miR.483.5p	hsa.miR.574.5p	hsa.miR.524.3p	hsa.miR.365b.5p	hsa.miR.99b.5p	hsa.miR.483.5p
	hsa.miR.382.5p	hsa.miR.342.3p	hsa.miR.328.5p	hsa.miR.483.3p	hsa.miR.638	hsa.miR.92b.5p	hsa.miR.376c.3p	hsa.miR.130b.3p	hsa.miR.483.3p
	hsa.miR.342.3p	hsa.miR.151a.5p	hsa.miR.342.3p	hsa.miR.493.3p	hsa.miR.411.5p	hsa.miR.574.5p	hsa.miR.376a.3p	hsa.miR.30e.3p	hsa.miR.493.3p
	hsa.miR.151a.5p	hsa.miR.335.5p	hsa.miR.151a.5p	hsa.miR.432.5p	hsa.miR.411.3p	hsa.miR.638	hsa.miR.378a.3p	hsa.miR.365a.5p	hsa.miR.432.5p
	hsa.miR.335.5p	hsa.miR.423.5p	hsa.miR.335.5p	hsa.miR.193b.5p	hsa.miR.657	hsa.miR.657	hsa.miR.382.5p	hsa.miR.365b.5p	hsa.miR.193b.5p
	hsa.miR.423.5p	hsa.miR.483.5p	hsa.miR.423.5p	hsa.miR.518b	hsa.miR.1224.3p	hsa.miR.421	hsa.miR.328.5p	hsa.miR.376c.3p	hsa.miR.525.3p
	hsa.miR.432.5p	hsa.miR.432.5p	hsa.miR.432.5p	hsa.miR.519d.5p	hsa.miR.320b	hsa.miR.1224.3p	hsa.miR.342.3p	hsa.miR.369.5p	hsa.miR.518b
	hsa.miR.193b.5p	hsa.miR.193b.5p	hsa.miR.193b.5p	hsa.miR.532.3p	hsa.miR.320c	hsa.miR.320b	hsa.miR.151a.5p	hsa.miR.376a.3p	hsa.miR.524.3p
	hsa.miR.532.3p	hsa.miR.532.3p	hsa.miR.92b.5p	hsa.miR.92b.5p	hsa.miR.769.5p	hsa.miR.320c	hsa.miR.335.5p	hsa.miR.378a.3p	hsa.miR.519d.5p
	hsa.miR.92b.5p	hsa.miR.92b.5p	hsa.miR.92b.3p	hsa.miR.574.5p	hsa.miR.765	hsa.miR.765	hsa.miR.423.5p	hsa.miR.382.5p	hsa.miR.92b.5p
	hsa.miR.92b.3p	hsa.miR.92b.3p	hsa.miR.574.5p	hsa.miR.638	hsa.miR.744.5p	hsa.miR.744.5p	hsa.miR.483.5p	hsa.miR.328.5p	hsa.miR.92b.3p
	hsa.miR.574.5p	hsa.miR.574.5p	hsa.miR.421	hsa.miR.411.3p	hsa.miR.1180.3p	hsa.miR.1180.3p	hsa.miR.483.3p	hsa.miR.342.3p	hsa.miR.574.5p
	hsa.miR.589.5p	hsa.miR.589.5p	hsa.miR.671.5p	hsa.miR.671.5p	hsa.miR.1207.5p	hsa.miR.548e.3p	hsa.miR.432.5p	hsa.miR.151a.5p	hsa.miR.589.5p
	hsa.miR.411.5p	hsa.miR.411.5p	hsa.miR.320b	hsa.miR.1224.3p	hsa.miR.548e.3p	hsa.miR.1290	hsa.miR.525.3p	hsa.miR.335.5p	hsa.miR.638
	hsa.miR.421	hsa.miR.421	hsa.miR.320c	hsa.miR.320b	hsa.miR.1290	hsa.miR.1246	hsa.miR.518b	hsa.miR.423.5p	hsa.miR.411.5p
	hsa.miR.671.5p	hsa.miR.671.5p	hsa.miR.769.5p	hsa.miR.320c	hsa.miR.1246	hsa.miR.1249.3p	hsa.miR.524.3p	hsa.miR.483.5p	hsa.miR.411.3p
	hsa.miR.320b	hsa.miR.320b	hsa.miR.744.5p	hsa.miR.765	hsa.miR.1249.5p	hsa.miR.1268a	hsa.miR.519d.5p	hsa.miR.483.3p	hsa.miR.657
	hsa.miR.320c	hsa.miR.320c	hsa.miR.877.5p	hsa.miR.744.5p	hsa.miR.1249.3p	hsa.miR.103b	hsa.miR.532.3p	hsa.miR.493.3p	hsa.miR.421
	hsa.miR.769.5p	hsa.miR.769.5p	hsa.miR.1180.3p	hsa.miR.877.5p	hsa.miR.1268a	hsa.miR.320d	hsa.miR.92b.5p	hsa.miR.432.5p	hsa.miR.671.5p
	hsa.miR.744.5p	hsa.miR.744.5p	hsa.miR.1290	hsa.miR.1180.3p	hsa.miR.1307.3p	hsa.miR.1908.3p	hsa.miR.92b.3p	hsa.miR.193b.5p	hsa.miR.1224.3p
	hsa.miR.877.5p	hsa.miR.877.5p	hsa.miR.1246	hsa.miR.1183	hsa.miR.103b	hsa.miR.3141	hsa.miR.574.5p	hsa.miR.525.3p	hsa.miR.320b
	hsa.miR.1180.3p	hsa.miR.1180.3p	hsa.miR.1249.3p	hsa.miR.1207.5p	hsa.miR.320d	hsa.miR.3147	hsa.miR.638	hsa.miR.524.3p	hsa.miR.320c
	hsa.miR.1290	hsa.miR.1290	hsa.miR.1268a	hsa.miR.548e.3p	hsa.miR.1908.5p	hsa.miR.3162.5p	hsa.miR.411.5p	hsa.miR.519d.5p	hsa.miR.769.5p
	hsa.miR.1246	hsa.miR.1246	hsa.miR.1275	hsa.miR.1290	hsa.miR.2861	hsa.miR.1260b	hsa.miR.411.3p	hsa.miR.532.3p	hsa.miR.765
	hsa.miR.1249.3p	hsa.miR.1249.5p	hsa.miR.1307.3p	hsa.miR.1246	hsa.miR.3126.3p	hsa.miR.3184.3p	hsa.miR.671.5p	hsa.miR.92b.3p	hsa.miR.744.5p
	hsa.miR.1268a	hsa.miR.1249.3p	hsa.miR.103b	hsa.miR.1268a	hsa.miR.3147	hsa.miR.3613.3p	hsa.miR.1224.3p	hsa.miR.574.5p	hsa.miR.877.5p
	hsa.miR.548h.5p	hsa.miR.1268a	hsa.miR.320d	hsa.miR.1275	hsa.miR.3162.5p	hsa.miR.3945	hsa.miR.320b	hsa.miR.589.5p	hsa.miR.1180.3p
	hsa.miR.1275	hsa.miR.1275	hsa.miR.1908.5p	hsa.miR.1307.3p	hsa.miR.3184.3p	hsa.miR.1268b	hsa.miR.320c	hsa.miR.638	hsa.miR.1183
	hsa.miR.1307.3p	hsa.miR.1307.3p	hsa.miR.1908.3p	hsa.miR.103b	hsa.miR.3195	hsa.miR.4429	hsa.miR.769.5p	hsa.miR.411.5p	hsa.miR.1207.5p
	hsa.miR.103b	hsa.miR.103b	hsa.miR.1260b	hsa.miR.320d	hsa.miR.3613.3p	hsa.miR.4448	hsa.miR.765	hsa.miR.411.3p	hsa.miR.548e.3p
	hsa.miR.320d	hsa.miR.320d	hsa.miR.3184.3p	hsa.miR.1908.5p	hsa.miR.3675.3p	hsa.miR.4458	hsa.miR.744.5p	hsa.miR.657	hsa.miR.1290
	hsa.miR.1908.5p	hsa.miR.1908.5p	hsa.miR.1268b	hsa.miR.1908.3p	hsa.miR.3916	hsa.miR.3135b	hsa.miR.877.5p	hsa.miR.421	hsa.miR.1246
	hsa.miR.1908.3p	hsa.miR.1908.3p	hsa.miR.4429	hsa.miR.2861	hsa.miR.3945	hsa.miR.4516	hsa.miR.1180.3p	hsa.miR.671.5p	hsa.miR.1249.5p
	hsa.miR.1260b	hsa.miR.1260b	hsa.miR.4458	hsa.miR.3126.3p	hsa.miR.1268b	hsa.miR.3960	hsa.miR.1183	hsa.miR.1224.3p	hsa.miR.1249.3p
	hsa.miR.3184.3p	hsa.miR.3184.3p	hsa.miR.3135b	hsa.miR.3147	hsa.miR.4429	hsa.miR.4651	hsa.miR.1207.5p	hsa.miR.320b	hsa.miR.1268a
	hsa.miR.1268b	hsa.miR.3202	hsa.miR.4488	hsa.miR.1260b	hsa.miR.4448	hsa.miR.4695.3p	hsa.miR.548e.3p	hsa.miR.320c	hsa.miR.548h.5p
	hsa.miR.4429	hsa.miR.4271	hsa.miR.4516	hsa.miR.3184.3p	hsa.miR.4458	hsa.miR.4713.5p	hsa.miR.1290	hsa.miR.769.5p	hsa.miR.1307.3p
	hsa.miR.3135b	hsa.miR.3916	hsa.miR.3960	hsa.miR.3202	hsa.miR.3135b	hsa.miR.4723.3p	hsa.miR.1246	hsa.miR.765	hsa.miR.103b
	hsa.miR.4488	hsa.miR.1268b	hsa.miR.4651	hsa.miR.3613.3p	hsa.miR.4488	hsa.miR.122b.3p	hsa.miR.1249.5p	hsa.miR.744.5p	hsa.miR.320d
	hsa.miR.2392	hsa.miR.4429	hsa.miR.4695.3p	hsa.miR.3675.3p	hsa.miR.4492	hsa.miR.4747.3p	hsa.miR.1249.3p	hsa.miR.877.5p	hsa.miR.1908.3p
	hsa.miR.4516	hsa.miR.3135b	hsa.miR.3529.3p	hsa.miR.3916	hsa.miR.2392	hsa.miR.4771	hsa.miR.1268a	hsa.miR.1180.3p	hsa.miR.2861
	hsa.miR.3960	hsa.miR.4488	hsa.miR.4723.3p	hsa.miR.3945	hsa.miR.3960	hsa.miR.4787.5p	hsa.miR.1275	hsa.miR.1183	hsa.miR.3126.3p
	hsa.miR.4634	hsa.miR.2392	hsa.miR.122b.3p	hsa.miR.1268b	hsa.miR.4695.3p	hsa.miR.5089.3p	hsa.miR.1307.3p	hsa.miR.1207.5p	hsa.miR.3141
	hsa.miR.4695.3p	hsa.miR.4516	hsa.miR.4747.3p	hsa.miR.4429	hsa.miR.4700.5p	hsa.miR.5193	hsa.miR.103b	hsa.miR.548e.3p	hsa.miR.3147
	hsa.miR.3529.3p	hsa.miR.3960	hsa.miR.4771	hsa.miR.4448	hsa.miR.4706	hsa.miR.5196.5p	hsa.miR.320d	hsa.miR.1290	hsa.miR.1260b
	hsa.miR.4723.3p	hsa.miR.4634	hsa.miR.4787.5p	hsa.miR.4458	hsa.miR.4713.5p	hsa.miR.5584.5p	hsa.miR.1908.5p	hsa.miR.1246	hsa.miR.3184.3p
	hsa.miR.122b.3p	hsa.miR.4651	hsa.miR.5196.5p	hsa.miR.3135b	hsa.miR.3529.3p	hsa.miR.6089	hsa.miR.1908.3p	hsa.miR.1249.5p	hsa.miR.3195
	hsa.miR.4787.5p	hsa.miR.4706	hsa.miR.5584.5p	hsa.miR.2392	hsa.miR.122b.3p	hsa.miR.6124	hsa.miR.2861	hsa.miR.1249.3p	hsa.miR.3202
	hsa.miR.6089	hsa.miR.3529.3p	hsa.miR.6089	hsa.miR.4516	hsa.miR.4747.3p	hsa.miR.6126	hsa.miR.3126.3p	hsa.miR.1268a	hsa.miR.4271
	hsa.miR.6126	hsa.miR.4723.3p	hsa.miR.6124	hsa.miR.3960	hsa.miR.4757.3p	hsa.miR.6503.5p	hsa.miR.3141	hsa.miR.548h.5p	hsa.miR.3613.3p
	hsa.miR.6724.5p	hsa.miR.122b.3p	hsa.miR.6126	hsa.miR.4695.3p	hsa.miR.4763.3p	hsa.miR.6717.5p	hsa.miR.3147	hsa.miR.1275	hsa.miR.3675.3p
	hsa.miR.6777.5p	hsa.miR.4771	hsa.miR.6717.5p	hsa.miR.4700.5p	hsa.miR.4787.5p	hsa.miR.6724.5p	hsa.miR.1260b	hsa.miR.1307.3p	hsa.miR.3916
	hsa.miR.6873.3p	hsa.miR.4787.5p	hsa.miR.6724.5p	hsa.miR.4706	hsa.miR.5089.3p	hsa.miR.6731.5p	hsa.miR.3184.3p	hsa.miR.103b	hsa.miR.3945
	hsa.miR.6880.5p	hsa.miR.5584.5p	hsa.miR.6730.5p	hsa.miR.4713.5p	hsa.miR.5193	hsa.miR.6746.3p	hsa.miR.3195	hsa.miR.320d	hsa.miR.1268b
	hsa.miR.7704	hsa.miR.6126	hsa.miR.6758.5p	hsa.miR.3529.3p	hsa.miR.5196.5p	hsa.miR.6774.3p	hsa.miR.3202	hsa.miR.1908.5p	hsa.miR.4429
	hsa.miR.7847.3p	hsa.miR.6724.5p	hsa.miR.6782.5p	hsa.miR.122b.3p	hsa.miR.5584.5p	hsa.miR.6777.5p	hsa.miR.4271	hsa.miR.1908.3p	hsa.miR.4448
	hsa.miR.7977	hsa.miR.6730.5p	hsa.miR.6788.3p	hsa.miR.4747.3p	hsa.miR.6089	hsa.miR.6788.3p	hsa.miR.3613.3p	hsa.miR.2861	hsa.miR.4458
	hsa.miR.8485	hsa.miR.6746.3p	hsa.miR.6795.5p	hsa.miR.4757.3p	hsa.miR.6124	hsa.miR.6794.5p	hsa.miR.3675.3p	hsa.miR.3126.3p	hsa.miR.3135b
	hsa.miR.10400.5p	hsa.miR.6758.5p	hsa.miR.6869.5p	hsa.miR.4771	hsa.miR.6126	hsa.miR.6795.5p	hsa.miR.3916	hsa.miR.3147	hsa.miR.4488
	hsa.miR.12136	hsa.miR.6777.5p	hsa.miR.6873.3p	hsa.miR.4787.5p	hsa.miR.6503.5p	hsa.miR.6796.3p	hsa.miR.3945	hsa.miR.3162.5p	hsa.miR.4492
		hsa.miR.6873.3p	hsa.miR.6879.5p	hsa.miR.5089.3p	hsa.miR.6717.5p	hsa.miR.6803.5p	hsa.miR.1268b	hsa.miR.1260b	hsa.miR.4516
		hsa.miR.7704	hsa.miR.6880.5p	hsa.miR.5193	hsa.miR.6724.5p	hsa.miR.6837.3p	hsa.miR.4429	hsa.miR.3184.3p	hsa.miR.3960
		hsa.miR.7847.3p	hsa.miR.6891.3p	hsa.miR.5584.5p	hsa.miR.6730.5p	hsa.miR.6867.5p	hsa.miR.4448	hsa.miR.3195	hsa.miR.4634
		hsa.miR.7977	hsa.miR.6892.3p	hsa.miR.6089	hsa.miR.6731.5p	hsa.miR.6869.5p	hsa.miR.4458	hsa.miR.3202	hsa.miR.4651
		hsa.miR.8485	hsa.miR.7107.5p	hsa.miR.6124	hsa.miR.6734.3p	hsa.miR.6880.5p	hsa.miR.3135b	hsa.miR.4271	hsa.miR.4695.3p
		hsa.miR.10400.5p	hsa.miR.7977	hsa.miR.6126	hsa.miR.6743.5p	hsa.miR.6891.3p	hsa.miR.4488	hsa.miR.3613.3p	hsa.miR.4700.5p
		hsa.miR.12136	hsa.miR.8485	hsa.miR.6503.5p	hsa.miR.6746.3p	hsa.miR.7107.5p	hsa.miR.4492	hsa.miR.3675.3p	hsa.miR.4713.5p
			hsa.miR.10400.5p	hsa.miR.6717.5p	hsa.miR.6772.3p	hsa.miR.7110.5p	hsa.miR.2392	hsa.miR.3916	hsa.miR.3529.3p
			hsa.miR.12136	hsa.miR.6724.5p	hsa.miR.6774.3p	hsa.miR.7704	hsa.miR.4516	hsa.miR.3945	hsa.miR.4723.3p
				hsa.miR.6727.5p	hsa.miR.6782.5p	hsa.miR.7847.3p	hsa.miR.3960	hsa.miR.1268b	hsa.miR.122b.3p
				hsa.miR.6730.5p	hsa.miR.6794.5p	hsa.miR.7977	hsa.miR.4634	hsa.miR.4429	hsa.miR.4747.3p
				hsa.miR.6731.5p	hsa.miR.6795.5p	hsa.miR.10400.5p	hsa.miR.4695.3p	hsa.miR.4448	hsa.miR.4757.3p
				hsa.miR.6734.3p	hsa.miR.6796.3p		hsa.miR.4700.5p	hsa.miR.4458	hsa.miR.4763.3p
				hsa.miR.6746.3p	hsa.miR.6801.3p		hsa.miR.4706	hsa.miR.3135b	hsa.miR.4771
				hsa.miR.6760.5p	hsa.miR.6803.5p		hsa.miR.4713.5p	hsa.miR.4488	hsa.miR.4787.5p
				hsa.miR.6772.3p	hsa.miR.6826.3p		hsa.miR.3529.3p	hsa.miR.4492	hsa.miR.5089.3p
				hsa.miR.6774.3p	hsa.miR.6837.3p		hsa.miR.122b.3p	hsa.miR.2392	hsa.miR.5193
				hsa.miR.6777.5p	hsa.miR.6865.5p		hsa.miR.4747.3p	hsa.miR.4516	hsa.miR.5196.5p
				hsa.miR.6782.5p	hsa.miR.6867.5p		hsa.miR.4757.3p	hsa.miR.3960	hsa.miR.5584.5p
				hsa.miR.6786.5p	hsa.miR.6869.5p		hsa.miR.4763.3p	hsa.miR.4634	hsa.miR.6089
				hsa.miR.6794.5p	hsa.miR.6873.3p		hsa.miR.4771	hsa.miR.4651	hsa.miR.6126
				hsa.miR.6795.5p	hsa.miR.6891.3p		hsa.miR.4787.5p	hsa.miR.4695.3p	hsa.miR.6503.5p
				hsa.miR.6796.3p	hsa.miR.6892.3p		hsa.miR.5089.3p	hsa.miR.4700.5p	hsa.miR.6717.5p
				hsa.miR.6801.3p	hsa.miR.7107.5p		hsa.miR.5193	hsa.miR.4706	hsa.miR.6724.5p
				hsa.miR.6803.5p	hsa.miR.7110.5p		hsa.miR.5196.5p	hsa.miR.4713.5p	hsa.miR.6727.5p
				hsa.miR.6865.5p	hsa.miR.7113.5p		hsa.miR.5584.5p	hsa.miR.3529.3p	hsa.miR.6730.5p
				hsa.miR.6867.5p	hsa.miR.7847.3p		hsa.miR.6089	hsa.miR.122b.3p	hsa.miR.6731.5p
				hsa.miR.6869.5p	hsa.miR.7977		hsa.miR.6124	hsa.miR.4747.3p	hsa.miR.6743.5p
				hsa.miR.6879.5p	hsa.miR.8060		hsa.miR.6126	hsa.miR.4757.3p	hsa.miR.6746.3p
				hsa.miR.6880.5p	hsa.miR.8485		hsa.miR.6503.5p	hsa.miR.4763.3p	hsa.miR.6760.5p
				hsa.miR.6891.3p	hsa.miR.10400.5p		hsa.miR.6717.5p	hsa.miR.4771	hsa.miR.6794.5p
				hsa.miR.6892.3p	hsa.miR.12116		hsa.miR.6724.5p	hsa.miR.4787.5p	hsa.miR.6795.5p
				hsa.miR.7113.5p			hsa.miR.6727.5p	hsa.miR.5089.3p	hsa.miR.6796.3p
				hsa.miR.7704			hsa.miR.6730.5p	hsa.miR.5193	hsa.miR.6801.3p
				hsa.miR.7847.3p			hsa.miR.6731.5p	hsa.miR.5196.5p	hsa.miR.6803.5p
				hsa.miR.7977			hsa.miR.6734.3p	hsa.miR.5584.5p	hsa.miR.6837.3p
				hsa.miR.8060			hsa.miR.6746.3p	hsa.miR.6089	hsa.miR.6865.5p
				hsa.miR.10400.5p			hsa.miR.6758.5p	hsa.miR.6124	hsa.miR.6867.5p
				hsa.miR.12116			hsa.miR.6760.5p	hsa.miR.6126	hsa.miR.6869.5p
				hsa.miR.12136			hsa.miR.6772.3p	hsa.miR.6503.5p	hsa.miR.6873.3p
							hsa.miR.6774.3p	hsa.miR.6717.5p	hsa.miR.6879.5p
							hsa.miR.6777.5p	hsa.miR.6724.5p	hsa.miR.6880.5p
							hsa.miR.6782.5p	hsa.miR.6727.5p	hsa.miR.6891.3p
							hsa.miR.6786.5p	hsa.miR.6730.5p	hsa.miR.6892.3p
							hsa.miR.6794.5p	hsa.miR.6731.5p	hsa.miR.7107.5p
							hsa.miR.6795.5p	hsa.miR.6746.3p	hsa.miR.7113.5p
							hsa.miR.6796.3p	hsa.miR.6758.5p	hsa.miR.7704
							hsa.miR.6801.3p	hsa.miR.6760.5p	hsa.miR.7847.3p
							hsa.miR.6803.5p	hsa.miR.6772.3p	hsa.miR.7977
							hsa.miR.6826.3p	hsa.miR.6774.3p	hsa.miR.8052
							hsa.miR.6837.3p	hsa.miR.6777.5p	hsa.miR.8060
							hsa.miR.6865.5p	hsa.miR.6782.5p	hsa.miR.8485
							hsa.miR.6867.5p	hsa.miR.6786.5p	hsa.miR.10400.5p
							hsa.miR.6869.5p	hsa.miR.6788.3p
							hsa.miR.6870.3p	hsa.miR.6794.5p
							hsa.miR.6873.3p	hsa.miR.6795.5p
							hsa.miR.6880.5p	hsa.miR.6796.3p
							hsa.miR.6891.3p	hsa.miR.6801.3p
							hsa.miR.6892.3p	hsa.miR.6803.5p
							hsa.miR.7107.5p	hsa.miR.6826.3p
							hsa.miR.7110.5p	hsa.miR.6837.3p
							hsa.miR.7113.5p	hsa.miR.6865.5p
							hsa.miR.7704	hsa.miR.6867.5p
							hsa.miR.7847.3p	hsa.miR.6869.5p
							hsa.miR.7977	hsa.miR.6870.3p
							hsa.miR.8060	hsa.miR.6873.3p
							hsa.miR.8485	hsa.miR.6879.5p
							hsa.miR.10400.5p	hsa.miR.6880.5p
							hsa.miR.12116	hsa.miR.6891.3p
							hsa.miR.12136	hsa.miR.6892.3p
								hsa.miR.7107.5p
								hsa.miR.7110.5p
								hsa.miR.7704
								hsa.miR.7847.3p
								hsa.miR.7977
								hsa.miR.8052
								hsa.miR.8060
								hsa.miR.8485
								hsa.miR.10400.5p
								hsa.miR.12116
								hsa.miR.12136

## Sheet: Table S2
Table S2. Differential miRNA Expression: Met5a_2.8k vs MSTO_2.8k
		logFC	logCPM	LR	PValue	FDR	adj-P	diffexp
	hsa.miR.548e.3p	16.3711	11.3002	78.3429	8.66204e-19	1.86234e-16	15.7299	UP
	hsa.miR.6746.3p	16.9076	12.0305	55.1979	1.08986e-13	1.1716e-11	10.9312	UP
	hsa.miR.6867.5p	14.5287	9.8887	52.4591	4.39305e-13	2.89517e-11	10.5383	UP
	hsa.miR.3613.3p	15.7651	10.1178	52.0588	5.38636e-13	2.89517e-11	10.5383	UP
	hsa.miR.8060	16.5257	11.3391	50.3069	1.31488e-12	5.654e-11	10.2476	UP
	hsa.miR.4713.5p	15.8319	11.1523	48.3224	3.61601e-12	1.29574e-10	9.88748	UP
	hsa.miR.6717.5p	15.5726	11.0193	46.3174	1.00568e-11	2.81821e-10	9.55003	UP
	hsa.miR.6503.5p	15.8966	11.124	46.1543	1.09295e-11	2.81821e-10	9.55003	UP
	hsa.miR.153.5p	14.8221	10.2157	46.0047	1.17972e-11	2.81821e-10	9.55003	UP
	hsa.miR.6865.5p	15.0257	10.8031	43	5.47406e-11	1.17692e-09	8.92925	UP
	hsa.miR.638	13.0354	8.8975	40.3987	2.07075e-10	4.04737e-09	8.39283	UP
	hsa.miR.5089.3p	15.1165	10.3764	38.5728	5.27486e-10	9.4508e-09	8.02453	UP
	hsa.miR.4757.3p	17.5386	10.7963	37.6281	8.56045e-10	1.37995e-08	7.86014	UP
	hsa.miR.765	13.2744	9.48362	37.5086	9.10105e-10	1.37995e-08	7.86014	UP
	hsa.miR.4747.3p	15.8409	10.4897	37.3989	9.62754e-10	1.37995e-08	7.86014	UP
	hsa.miR.6731.5p	14.1678	9.52556	36.8424	1.28073e-09	1.72098e-08	7.76422	UP
	hsa.miR.6892.3p	13.7392	8.71485	29.1723	6.62207e-08	8.37497e-07	6.07702	UP
	hsa.miR.6801.3p	12.9533	8.20142	28.6988	8.45556e-08	1.00997e-06	5.99569	UP
	hsa.miR.6794.5p	12.7815	8.81328	27.5307	1.54618e-07	1.70499e-06	5.76828	UP
	hsa.miR.4458	11.2492	10.5378	27.4815	1.58604e-07	1.70499e-06	5.76828	UP
	hsa.miR.3916	14.7678	9.82343	26.8246	2.22788e-07	2.28092e-06	5.64189	UP
	hsa.miR.3945	12.587	8.24887	23.5934	1.18996e-06	1.16291e-05	4.93445	UP
	hsa.miR.3675.3p	12.9761	7.78637	22.5783	2.01748e-06	1.8859e-05	4.72448	UP
	hsa.miR.411.3p	12.4063	7.33112	22.3849	2.23125e-06	1.99883e-05	4.69922	UP
	hsa.miR.5584.5p	13.5059	8.47221	22.1955	2.46245e-06	2.1177e-05	4.67413	UP
	hsa.miR.6774.3p	13.1263	8.21895	22.077	2.61932e-06	2.16598e-05	4.66435	UP
	hsa.miR.1224.3p	11.9076	7.83689	21.6864	3.21054e-06	2.55654e-05	4.59235	UP
	hsa.miR.6772.3p	12.3526	7.61358	21.5558	3.43681e-06	2.63898e-05	4.57856	UP
	hsa.miR.6796.3p	12.1226	8.19825	21.4869	3.56253e-06	2.64119e-05	4.5782	UP
	hsa.miR.122.5p	6.48649	11.456	21.3042	3.91864e-06	2.80836e-05	4.55155	UP
	hsa.miR.6837.3p	13.4064	8.6271	21.2223	4.08984e-06	2.8365e-05	4.54722	UP
	hsa.miR.122b.3p	7.75991	11.3817	20.1324	7.2261e-06	4.85504e-05	4.31381	UP
	hsa.miR.3147	12.1964	6.80947	19.1678	1.19718e-05	7.76592e-05	4.10981	UP
	hsa.miR.6869.5p	13.0338	7.9484	19.1191	1.2281e-05	7.76592e-05	4.10981	UP
	hsa.miR.4700.5p	12.2525	7.60117	19.0029	1.30518e-05	8.01755e-05	4.09596	UP
	hsa.miR.7110.5p	11.4931	7.07541	18.8804	1.39176e-05	8.31191e-05	4.0803	UP
	hsa.miR.6124	11.3765	8.02172	18.3655	1.82333e-05	0.00010595	3.9749	UP
	hsa.miR.4695.3p	10.1297	8.49021	18.1955	1.99347e-05	0.000112788	3.94774	UP
	hsa.miR.6795.5p	10.3464	7.72822	17.7795	2.48042e-05	0.000136741	3.8641	UP
	hsa.miR.5193	7.93817	10.9435	17.0866	3.57126e-05	0.000188839	3.72391	UP
	hsa.let.7f.2.3p	13.2136	7.58935	17.0708	3.60112e-05	0.000188839	3.72391	UP
	hsa.miR.342.3p	8.3356	12.2554	17.0101	3.71808e-05	0.00019033	3.72049	UP
	hsa.miR.16.5p	-4.08984	14.8836	15.7444	7.25038e-05	0.000362519	3.44067	DOWN	hsa.miR.16.5p
	hsa.miR.6891.3p	12.4019	8.24927	15.5032	8.23636e-05	0.000402458	3.39528	UP
	hsa.miR.6730.5p	12.7359	8.53644	14.9278	0.000111706	0.000533708	3.2727	UP
	hsa.miR.1249.5p	11.0482	6.97991	14.2399	0.000160923	0.000752139	3.1237	UP
	hsa.miR.30e.3p	-6.68113	9.73244	13.8826	0.000194593	0.000884398	3.05335	DOWN	hsa.miR.30e.3p
	hsa.miR.3960	3.13778	12.9659	13.8552	0.000197447	0.000884398	3.05335	UP
	hsa.miR.6734.3p	11.3938	6.88795	13.417	0.000249357	0.00109412	2.96094	UP
	hsa.miR.196a.5p	-6.24239	11.2975	13.2466	0.000273077	0.00117423	2.93025	DOWN	hsa.miR.196a.5p
	hsa.miR.3195	13.0509	7.65057	13.1873	0.000281849	0.00118819	2.92511	UP
	hsa.miR.483.3p	11.5297	6.97856	13.1296	0.000290671	0.00120181	2.92016	UP
	hsa.miR.4763.3p	12.2429	7.11423	12.9826	0.000314394	0.00126363	2.89838	UP
	hsa.miR.1207.5p	10.5727	7.65449	12.965	0.000317376	0.00126363	2.89838	UP
	hsa.miR.2861	11.9148	7.41498	12.8392	0.000339433	0.00132687	2.87717	UP
	hsa.miR.4771	12.379	8.06879	12.5908	0.000387651	0.00147287	2.83184	UP
	hsa.miR.376c.3p	10.3494	7.94904	12.5772	0.000390482	0.00147287	2.83184	UP
	hsa.miR.4492	11.9704	7.18125	12.3799	0.000433973	0.00160869	2.79353	UP
	hsa.miR.6782.5p	12.6674	7.9843	12.2744	0.000459225	0.00167345	2.77639	UP
	hsa.miR.328.5p	12.45	6.80978	12.2106	0.000475189	0.00170276	2.76885	UP
	hsa.miR.7847.3p	7.00831	10.6619	12.1048	0.000502921	0.00177259	2.75139	UP
	hsa.miR.3202	11.2193	7.38827	11.9994	0.000532176	0.00184545	2.7339	UP
	hsa.miR.154.5p	10.4089	6.76127	11.744	0.000610396	0.0020831	2.68129	UP
	hsa.miR.6826.3p	12.9078	6.7089	11.5827	0.0006657	0.00223634	2.65046	UP
	hsa.miR.3141	10.5431	6.95905	11.4989	0.000696383	0.00230342	2.63763	UP
	hsa.miR.519d.5p	10.0086	6.42369	11.3859	0.000740032	0.00241071	2.61785	UP
	hsa.miR.6727.5p	10.8838	6.46283	11.2732	0.000786354	0.00252337	2.59802	UP
	hsa.miR.574.5p	-3.90034	12.4373	10.8853	0.000969281	0.00306464	2.51362	DOWN	hsa.miR.574.5p
	hsa.let.7e.5p	-2.99433	15.0721	10.6529	0.00109901	0.00339013	2.46978	DOWN	hsa.let.7e.5p
	hsa.miR.365b.5p	12.0628	7.01389	10.6449	0.00110376	0.00339013	2.46978	UP
	hsa.miR.3126.3p	7.95975	9.10469	10.4999	0.00119379	0.00361499	2.44189	UP
	hsa.miR.5196.5p	10.5805	7.59281	10.0703	0.00150675	0.00449933	2.34685	UP
	hsa.miR.524.3p	9.55433	7.52146	10.012	0.00155522	0.00458044	2.33909	UP
	hsa.miR.525.3p	9.5554	7.59182	9.81801	0.00172811	0.00502087	2.29922	UP
	hsa.miR.1183	10.5818	6.65206	9.58643	0.0019602	0.00561925	2.25032	UP
	hsa.miR.6760.5p	10.4024	7.15907	9.39031	0.00218135	0.00610918	2.21402	UP
	hsa.let.7f.5p	-2.85855	16.8099	9.38478	0.00218794	0.00610918	2.21402	DOWN
	hsa.miR.191.5p	-2.80072	13.3221	9.23909	0.00236902	0.00653	2.18509	DOWN
	hsa.miR.6786.5p	10.7577	7.11826	9.12303	0.00252411	0.00686941	2.16308	UP
	hsa.miR.130a.3p	-4.2817	10.0659	9.04448	0.00263489	0.00708127	2.14989	DOWN
	hsa.miR.1249.3p	8.78661	7.92471	9.00967	0.00268555	0.0071283	2.14701	UP
	hsa.miR.4271	10.5154	6.44379	8.97405	0.00273841	0.00717998	2.14388	UP
	hsa.miR.6126	5.12162	10.0277	8.81219	0.00299225	0.00775102	2.11064	UP
	hsa.miR.26a.5p	-2.86356	14.1909	8.56891	0.00341952	0.00875236	2.05788	DOWN
	hsa.miR.518b	9.5655	6.43934	7.98346	0.00472065	0.0119405	1.92298	UP
	hsa.miR.1275	-4.93565	9.30415	7.72835	0.00543605	0.0135901	1.86678	DOWN
	hsa.miR.6870.3p	10.1654	6.69844	7.67984	0.00558413	0.0137999	1.86013	UP
	hsa.miR.12116	10.11	7.04595	7.47731	0.00624815	0.0152654	1.81629	UP
	hsa.miR.197.3p	-13.2046	8.55499	7.39299	0.00654785	0.0158178	1.80085	DOWN
	hsa.let.7g.5p	-2.56217	15.5611	7.15881	0.00745966	0.0176726	1.7527	DOWN
	hsa.miR.28.3p	-4.14839	10.1752	7.15392	0.00748003	0.0176726	1.7527	DOWN
	hsa.let.7a.5p	-2.32673	18.1606	7.03694	0.00798454	0.0186595	1.7291	DOWN
	hsa.let.7i.5p	-2.13628	17.2613	6.81665	0.00903119	0.0208786	1.6803	DOWN
	hsa.let.7b.5p	-2.17379	17.0807	6.45906	0.0110388	0.0252483	1.59777	DOWN
	hsa.miR.7107.5p	8.38236	6.59523	6.21411	0.0126736	0.0286823	1.54239	UP
	hsa.miR.99b.5p	-3.31469	10.0357	6.00954	0.0142287	0.0318664	1.49667	DOWN
	hsa.miR.185.5p	-2.63837	11.3242	5.76211	0.0163754	0.0362959	1.44014	DOWN
	hsa.miR.6803.5p	5.5037	8.18496	5.73906	0.0165917	0.0364002	1.4389	UP
	hsa.let.7d.5p	-2.05888	13.7905	5.70199	0.0169457	0.0365454	1.43717	DOWN
	hsa.miR.93.5p	-2.77632	12.7926	5.69319	0.0170308	0.0365454	1.43717	DOWN
	hsa.miR.10a.5p	-2.59575	11.9986	5.67914	0.0171678	0.0365454	1.43717	DOWN
	hsa.miR.6089	5.8236	9.07895	5.65747	0.0173812	0.0366368	1.43608	UP
	hsa.miR.10400.5p	3.97599	9.32399	5.63799	0.0175753	0.0366864	1.43549	UP
	hsa.miR.138.5p	4.57775	9.20527	5.32497	0.0210219	0.0434588	1.36192	UP
	hsa.miR.335.5p	-2.06608	12.9645	5.25762	0.0218509	0.0447422	1.34928	DOWN
	hsa.miR.99a.5p	4.30447	6.79221	5.20503	0.0225216	0.0456807	1.34027	UP
	hsa.miR.30a.5p	-12.6116	8.17854	5.1364	0.0234292	0.0470774	1.32719	DOWN
	hsa.miR.193b.5p	-12.3398	8.11311	5.08089	0.0241909	0.0481578	1.31733	DOWN
	hsa.miR.22.5p	4.9522	8.71443	5.0304	0.0249061	0.0491267	1.30868	UP
	hsa.miR.1260b	-4.18424	8.57084	4.99586	0.025408	0.049661	1.30398	DOWN
	hsa.miR.127.3p	3.17777	9.66717	4.90015	0.0268544	0.0520153	1.28387	NO
	hsa.let.7c.5p	2.15604	12.2717	4.76474	0.0290485	0.0557627	1.25366	NO
	hsa.miR.23a.5p	5.72855	8.19828	4.49639	0.0339664	0.0646264	1.18959	NO
	hsa.miR.4634	5.85027	7.58082	4.31368	0.0378072	0.071303	1.14689	NO
	hsa.miR.155.5p	1.8184	12.8185	4.2806	0.0385496	0.072071	1.14224	NO
	hsa.miR.151a.5p	-2.12323	12.7249	4.16313	0.041313	0.0765715	1.11593	NO
	hsa.miR.7704	4.99034	8.67874	4.00015	0.0454962	0.0836042	1.07777	NO
	hsa.miR.98.5p	-1.71437	13.1742	3.9284	0.047477	0.0865048	1.06296	NO
	hsa.miR.421	-12.0124	7.96022	3.90108	0.0482551	0.0871835	1.05957	NO
	hsa.miR.532.3p	4.97025	7.70965	3.82236	0.050573	0.0906099	1.04282	NO
	hsa.miR.6777.5p	4.47847	7.65646	3.63453	0.0565925	0.10041	0.998223	NO
	hsa.miR.4448	5.43515	7.79678	3.62327	0.0569769	0.10041	0.998223	NO
	hsa.miR.126.3p	-2.33638	10.8279	3.5963	0.0579083	0.101222	0.994726	NO
	hsa.miR.1908.5p	-3.19147	9.88081	3.46026	0.0628605	0.108992	0.962606	NO
	hsa.miR.1290	1.64734	12.603	3.4184	0.0644737	0.110895	0.955089	NO
	hsa.miR.29b.3p	-2.19186	10.743	3.26812	0.0706384	0.120534	0.918891	NO
	hsa.miR.4429	3.77984	7.27843	3.19008	0.0740863	0.125422	0.901628	NO
	hsa.miR.149.5p	-2.21766	10.53	3.04967	0.0807537	0.135641	0.867609	NO
	hsa.miR.483.5p	4.07931	7.49938	3.00838	0.0828353	0.138059	0.859936	NO
	hsa.miR.7113.5p	4.4497	7.34947	2.9267	0.0871253	0.144092	0.841361	NO
	hsa.miR.4516	3.60108	8.74077	2.83281	0.0923564	0.151577	0.819366	NO
	hsa.miR.4706	5.58218	7.51795	2.82028	0.0930804	0.151608	0.819277	NO
	hsa.miR.6758.5p	5.95856	6.79111	2.76329	0.0964499	0.155915	0.807111	NO
	hsa.miR.130b.3p	-2.85269	9.25935	2.56183	0.109472	0.174866	0.757295	NO
	hsa.miR.1908.3p	2.62341	8.71574	2.55291	0.110091	0.174866	0.757295	NO
	hsa.miR.1246	1.66893	12.3409	2.54544	0.110613	0.174866	0.757295	NO
	hsa.miR.30c.5p	-3.70421	7.65537	2.38729	0.122325	0.19197	0.716766	NO
	hsa.miR.25.5p	-10.3441	6.96817	2.36839	0.123814	0.192899	0.714669	NO
	hsa.miR.432.5p	1.83394	10.1497	2.27661	0.131339	0.20315	0.692184	NO
	hsa.miR.365a.5p	3.86592	7.61547	2.25652	0.133053	0.204331	0.689665	NO
	hsa.miR.103a.3p	-1.57787	11.01	2.22539	0.135758	0.204942	0.68837	NO
	hsa.miR.103b	-1.57787	11.01	2.22539	0.135758	0.204942	0.68837	NO
	hsa.miR.3135b	1.52037	10.2713	2.21913	0.13631	0.204942	0.68837	NO
	hsa.miR.125a.5p	-2.65498	9.206	2.1233	0.145074	0.216603	0.664335	NO
	hsa.miR.182.5p	-2.04699	9.79802	1.85103	0.173664	0.257502	0.589219	NO
	hsa.miR.6873.3p	3.08609	7.06063	1.77516	0.182745	0.269111	0.570069	NO
	hsa.miR.12136	2.33789	8.18591	1.73744	0.187463	0.274181	0.561962	NO
	hsa.miR.589.5p	-9.80017	6.96833	1.60438	0.205284	0.297922	0.525897	NO
	hsa.miR.100.5p	1.13883	12.56	1.59206	0.207033	0.297922	0.525897	NO
	hsa.miR.320a.3p	-0.9856	14.3054	1.58632	0.207853	0.297922	0.525897	NO
	hsa.miR.31.5p	-2.04468	11.605	1.55511	0.212382	0.302399	0.51942	NO
	hsa.miR.30a.3p	-1.32316	12.0604	1.51329	0.218638	0.309257	0.50968	NO
	hsa.miR.376a.3p	2.79401	7.81106	1.34407	0.246317	0.346132	0.460758	NO
	hsa.miR.1307.3p	-1.95889	8.70753	1.15543	0.282415	0.394065	0.404432	NO
	hsa.miR.2392	2.66397	7.00079	1.14126	0.285387	0.394065	0.404432	NO
	hsa.miR.671.5p	-1.91708	9.28959	1.1387	0.285926	0.394065	0.404432	NO
	hsa.miR.548h.5p	-8.68285	6.60989	1.10932	0.292231	0.400188	0.397736	NO
	hsa.miR.7.5p	-1.38751	11.8286	1.03348	0.309343	0.418294	0.378518	NO
	hsa.miR.3529.3p	-1.38751	11.8286	1.03348	0.309343	0.418294	0.378518	NO
	hsa.miR.1180.3p	-1.11955	10.5165	1.00545	0.315996	0.424619	0.372	NO
	hsa.miR.34a.5p	-1.38146	9.89657	0.967203	0.325379	0.434512	0.361998	NO
	hsa.miR.378a.3p	1.39975	9.00799	0.845656	0.357784	0.474837	0.323455	NO
	hsa.miR.21.5p	-1.18342	10.7291	0.755806	0.384644	0.507353	0.29469	NO
	hsa.miR.6724.5p	1.14896	8.97559	0.741308	0.389242	0.510287	0.292186	NO
	hsa.miR.382.5p	0.886498	10.9569	0.703024	0.401769	0.523518	0.281069	NO
	hsa.miR.184	1.90202	7.86582	0.619332	0.431295	0.558606	0.252895	NO
	hsa.miR.320d	-0.614188	11.9045	0.510006	0.475136	0.611702	0.21346	NO
	hsa.miR.221.3p	0.734274	10.5531	0.485241	0.486058	0.622038	0.206183	NO
	hsa.miR.423.5p	-0.525553	14.7289	0.433407	0.510322	0.640375	0.193566	NO
	hsa.miR.3184.3p	-0.525553	14.7289	0.433407	0.510322	0.640375	0.193566	NO
	hsa.miR.3162.5p	-6.78173	7.06928	0.432506	0.510762	0.640375	0.193566	NO
	hsa.miR.369.5p	-6.53109	8.17615	0.429367	0.5123	0.640375	0.193566	NO
	hsa.miR.17.5p	-1.36426	7.77103	0.421264	0.516307	0.641653	0.1927	NO
	hsa.miR.92a.3p	0.847552	9.22789	0.401244	0.526448	0.650496	0.186756	NO
	hsa.miR.6825.5p	-6.65649	3.93153	0.385637	0.534602	0.656797	0.182569	NO
	hsa.miR.193a.5p	-0.862515	10.0186	0.369592	0.543227	0.663538	0.178134	NO
	hsa.miR.142.3p	-6.4632	6.35534	0.364058	0.546261	0.663538	0.178134	NO
	hsa.miR.320c	-0.510864	12.6858	0.335498	0.562439	0.679351	0.167906	NO
	hsa.miR.181a.5p	-0.810886	9.58398	0.325801	0.568142	0.682405	0.165958	NO
	hsa.miR.8485	-1.19789	7.95892	0.275946	0.59937	0.715915	0.145139	NO
	hsa.miR.4787.5p	0.5479	9.60119	0.213045	0.644391	0.765437	0.11609	NO
	hsa.miR.15b.5p	-0.631366	9.50735	0.181639	0.669968	0.789814	0.102475	NO
	hsa.miR.485.5p	-5.08315	6.51607	0.17897	0.67226	0.789814	0.102475	NO
	hsa.miR.20a.5p	0.786586	8.15762	0.166764	0.683004	0.798075	0.0979563	NO
	hsa.miR.7977	-1.10482	8.08073	0.1566	0.692306	0.804572	0.0944351	NO
	hsa.miR.320b	-0.315732	13.2045	0.14701	0.701409	0.810769	0.0911029	NO
	hsa.miR.143.3p	0.820092	7.75182	0.13037	0.718049	0.823111	0.0845417	NO
	hsa.miR.6880.5p	-0.96325	6.82393	0.128739	0.719743	0.823111	0.0845417	NO
	hsa.miR.769.5p	-0.738918	7.64317	0.121547	0.727362	0.827423	0.0822724	NO
	hsa.miR.29a.3p	-0.412825	10.3568	0.109692	0.740495	0.837928	0.076793	NO
	hsa.miR.27a.3p	-0.544325	8.62995	0.102177	0.749232	0.843377	0.0739784	NO
	hsa.miR.92b.3p	-0.578556	8.68632	0.0912576	0.762584	0.853936	0.0685749	NO
	hsa.miR.4488	0.812714	7.28672	0.0791163	0.778499	0.867239	0.061861	NO
	hsa.miR.23b.3p	0.283001	9.8598	0.0482003	0.826225	0.915662	0.038265	NO
	hsa.miR.22.3p	-0.450896	8.01912	0.0446165	0.832711	0.918117	0.0371019	NO
	hsa.miR.224.5p	0.299833	8.94159	0.0325409	0.856846	0.939907	0.026915	NO
	hsa.miR.107	-0.24268	8.39224	0.0291592	0.864412	0.943249	0.0253737	NO
	hsa.miR.877.5p	-0.282841	8.56739	0.0264342	0.870844	0.943249	0.0253737	NO
	hsa.miR.1268a	-0.18796	9.68966	0.0254501	0.873251	0.943249	0.0253737	NO
	hsa.miR.181b.5p	-0.20389	9.45231	0.0234745	0.87823	0.943249	0.0253737	NO
	hsa.miR.23a.3p	0.167281	9.80188	0.0212848	0.884006	0.943249	0.0253737	NO
	hsa.miR.411.5p	0.375363	7.4893	0.0193229	0.889445	0.943249	0.0253737	NO
	hsa.miR.744.5p	-0.135468	11.2648	0.0181386	0.892865	0.943249	0.0253737	NO
	hsa.miR.1268b	0.145706	9.89548	0.0174222	0.89499	0.943249	0.0253737	NO
	hsa.miR.6879.5p	-1.65309	6.60605	0.0134668	0.907616	0.95189	0.0214134	NO
	hsa.miR.4723.3p	-1.41917	7.82577	0.0104403	0.918616	0.958749	0.0182949	NO
	hsa.miR.125b.5p	-0.106505	9.25475	0.00669913	0.934767	0.970894	0.0128283	NO
	hsa.miR.92b.5p	0.131239	7.75832	0.00471917	0.945231	0.977042	0.0100867	NO
	hsa.miR.24.3p	0.0601497	9.11528	0.00143349	0.969798	0.997639	0.0010265	NO
	hsa.miR.6788.3p	0	6.63255	3.67245e-07	0.999516	0.999727	0.000118698	NO
	hsa.miR.6743.5p	0	5.85753	2.84424e-07	0.999574	0.999727	0.000118698	NO
	hsa.miR.4651	0	6.62554	2.29924e-07	0.999617	0.999727	0.000118698	NO
	hsa.miR.657	0	7.1598	2.14804e-07	0.99963	0.999727	0.000118698	NO
	hsa.miR.493.3p	0	6.53843	1.96439e-07	0.999646	0.999727	0.000118698	NO
	hsa.miR.8052	0	6.42249	1.17306e-07	0.999727	0.999727	0.000118698	NO

## Sheet: Table S3
Table S3. Differential miRNA Expression: Met5a_10k vs MSTO_10k
		logFC	logCPM	LR	PValue	FDR	adj-P	diffexp
	hsa.miR.548e.3p	15.409	11.3002	68.6197	1.19404e-16	2.56718e-14	13.5905	UP
	hsa.miR.6867.5p	14.13	9.8887	47.5907	5.25171e-12	5.64558e-10	9.24829	UP
	hsa.miR.4713.5p	16.0909	11.1523	46.6128	8.64937e-12	6.19872e-10	9.2077	UP
	hsa.miR.153.5p	14.9919	10.2157	43.9465	3.37478e-11	1.81394e-09	8.74138	UP
	hsa.miR.3613.3p	14.2493	10.1178	43.4905	4.26026e-11	1.83191e-09	8.73709	UP
	hsa.miR.6717.5p	15.3286	11.0193	42.9646	5.57395e-11	1.99733e-09	8.69955	UP
	hsa.miR.6503.5p	15.392	11.124	42.0497	8.89823e-11	2.60228e-09	8.58465	UP
	hsa.miR.6865.5p	15.0682	10.8031	41.8845	9.68292e-11	2.60228e-09	8.58465	UP
	hsa.miR.8060	14.1205	11.3391	39.4812	3.31236e-10	7.91286e-09	8.10167	UP
	hsa.miR.638	13.1307	8.8975	39.1243	3.97673e-10	8.54997e-09	8.06804	UP
	hsa.miR.5193	15.0068	10.9435	37.8109	7.79432e-10	1.52344e-08	7.81718	UP
	hsa.miR.4458	14.4722	10.5378	36.8338	1.2864e-09	2.30481e-08	7.63737	UP
	hsa.miR.4747.3p	15.1948	10.4897	33.7718	6.19696e-09	1.02488e-07	6.98933	UP
	hsa.miR.765	11.6006	9.48362	30.6041	3.1642e-08	4.85931e-07	6.31342	UP
	hsa.miR.6746.3p	9.98993	12.0305	28.442	9.65471e-08	1.38384e-06	5.85891	UP
	hsa.miR.6794.5p	13.5994	8.81328	27.7639	1.37056e-07	1.8417e-06	5.73478	UP
	hsa.miR.6801.3p	12.4947	8.20142	25.7023	3.98346e-07	5.03791e-06	5.29775	UP
	hsa.miR.3960	4.23295	12.9659	23.4446	1.28565e-06	1.53564e-05	4.81371	UP
	hsa.miR.1224.3p	12.5624	7.83689	23.167	1.48521e-06	1.68063e-05	4.77453	UP
	hsa.miR.3945	13.0259	8.24887	22.9971	1.62245e-06	1.74414e-05	4.75842	UP
	hsa.miR.4757.3p	11.6049	10.7963	22.0371	2.67431e-06	2.73798e-05	4.56257	UP
	hsa.miR.3126.3p	13.4916	9.10469	21.6551	3.26347e-06	3.1893e-05	4.4963	UP
	hsa.miR.6796.3p	12.6693	8.19825	21.154	4.23818e-06	3.96177e-05	4.40211	UP
	hsa.miR.6795.5p	12.1807	7.72822	20.3409	6.47994e-06	5.80495e-05	4.2362	UP
	hsa.miR.4695.3p	11.1225	8.49021	20.1532	7.1482e-06	6.14745e-05	4.2113	UP
	hsa.miR.6837.3p	13.1633	8.6271	19.5494	9.80299e-06	8.10632e-05	4.09118	UP
	hsa.miR.7110.5p	12.3822	7.07541	19.2315	1.15787e-05	9.21129e-05	4.03568	UP
	hsa.miR.3675.3p	11.9306	7.78637	19.1639	1.19961e-05	9.21129e-05	4.03568	UP
	hsa.miR.6892.3p	10.4665	8.71485	18.8712	1.3985e-05	0.000100785	3.99661	UP
	hsa.miR.6772.3p	11.6877	7.61358	18.8606	1.4063e-05	0.000100785	3.99661	UP
	hsa.miR.411.3p	11.1464	7.33112	18.3523	1.83601e-05	0.000126342	3.89845	UP
	hsa.miR.6803.5p	12.0981	8.18496	18.3067	1.88043e-05	0.000126342	3.89845	UP
	hsa.miR.6124	11.8139	8.02172	17.8888	2.34192e-05	0.00015258	3.8165	UP
	hsa.miR.5089.3p	8.47115	10.3764	17.6702	2.6271e-05	0.000166125	3.77956	UP
	hsa.miR.4700.5p	11.4584	7.60117	16.4102	5.10092e-05	0.000313342	3.50398	UP
	hsa.miR.1246	4.53799	12.3409	16.1312	5.91035e-05	0.000352979	3.45225	UP
	hsa.miR.122.5p	5.18241	11.456	15.1528	9.91494e-05	0.000576138	3.23947	UP
	hsa.miR.1290	3.57786	12.603	14.822	0.000118149	0.000668473	3.17492	UP
	hsa.miR.376a.3p	11.9676	7.81106	14.5582	0.000135893	0.000749156	3.12543	UP
	hsa.miR.3916	9.64974	9.82343	14.4101	0.000147012	0.000773615	3.11148	UP
	hsa.miR.23a.5p	12.5094	8.19828	14.4035	0.000147527	0.000773615	3.11148	UP
	hsa.let.7f.2.3p	11.8538	7.58935	14.2272	0.000162016	0.000829365	3.08125	UP
	hsa.miR.6880.5p	11.095	6.82393	14.002	0.00018262	0.000913098	3.03948	UP
	hsa.miR.196a.5p	-6.39173	11.2975	13.7288	0.000211192	0.00103196	2.98634	DOWN	hsa.miR.196a.5p
	hsa.miR.122b.3p	5.70162	11.3817	12.8778	0.000332508	0.00158865	2.79897	UP
	hsa.miR.3147	9.36994	6.80947	12.7103	0.000363656	0.0016997	2.76963	UP
	hsa.miR.657	10.097	7.1598	12.0687	0.000512764	0.00230912	2.63655	UP
	hsa.miR.342.3p	6.52121	12.2554	12.0587	0.000515525	0.00230912	2.63655	UP
	hsa.miR.519d.5p	11.1089	6.42369	11.9929	0.00053403	0.00234319	2.63019	UP
	hsa.miR.483.3p	11.2501	6.97856	11.9149	0.000556855	0.00239448	2.62079	UP
	hsa.miR.1207.5p	10.3869	7.65449	11.8319	0.00058224	0.00245454	2.61003	UP
	hsa.miR.6731.5p	6.20541	9.52556	11.7175	0.000619145	0.00253227	2.59649	UP
	hsa.miR.4763.3p	11.8014	7.11423	11.7023	0.000624234	0.00253227	2.59649	UP
	hsa.miR.6788.3p	11.7355	6.63255	11.3171	0.000767967	0.00305764	2.51461	UP
	hsa.miR.7847.3p	6.61214	10.6619	11.1226	0.000852813	0.00333372	2.47707	UP
	hsa.miR.4787.5p	4.01604	9.60119	11.0381	0.000892605	0.00342696	2.46509	UP
	hsa.miR.365a.5p	10.2308	7.61547	10.9545	0.000933758	0.00352207	2.4532	UP
	hsa.miR.10400.5p	5.92451	9.32399	10.8974	0.000963012	0.00356979	2.44736	UP
	hsa.miR.28.3p	-5.31491	10.1752	10.4491	0.00122708	0.00447156	2.34954	DOWN	hsa.miR.28.3p
	hsa.miR.1183	11.3513	6.65206	9.67074	0.00187226	0.00670892	2.17335	UP
	hsa.miR.328.5p	10.603	6.80978	9.62147	0.00192315	0.00677833	2.16888	UP
	hsa.miR.2861	10.4826	7.41498	9.29293	0.0023004	0.0079772	2.09815	UP
	hsa.miR.7107.5p	10.1295	6.59523	9.05275	0.002623	0.00895151	2.0481	UP
	hsa.miR.6727.5p	9.41815	6.46283	8.82618	0.00296939	0.0099753	2.00107	UP
	hsa.miR.5196.5p	9.94145	7.59281	8.73771	0.00311695	0.0103099	1.98674	UP
	hsa.miR.6760.5p	10.355	7.15907	8.68469	0.00320895	0.0104534	1.98074	UP
	hsa.miR.548h.5p	9.52388	6.60989	8.51591	0.00352054	0.0112973	1.94703	UP
	hsa.miR.524.3p	8.78575	7.52146	8.34701	0.00386322	0.0122146	1.91312	UP
	hsa.miR.191.5p	-2.61775	13.3221	8.30007	0.00396436	0.0123527	1.90824	DOWN	hsa.miR.191.5p
	hsa.miR.525.3p	8.78537	7.59182	8.19138	0.00420898	0.0129276	1.88848	UP
	hsa.miR.3195	8.93451	7.65057	7.98451	0.00471793	0.0142867	1.84507	UP
	hsa.let.7e.5p	-2.51156	15.0721	7.89216	0.00496495	0.0148259	1.82898	DOWN	hsa.let.7e.5p
	hsa.miR.6869.5p	7.309	7.9484	7.85778	0.00506024	0.0149034	1.82671	UP
	hsa.let.7c.5p	2.75664	12.2717	7.59226	0.00586193	0.0168804	1.77262	UP
	hsa.miR.16.5p	-2.61799	14.8836	7.58411	0.00588851	0.0168804	1.77262	DOWN	hsa.miR.16.5p
	hsa.miR.127.3p	3.88606	9.66717	7.26243	0.00704119	0.0199192	1.70073	UP
	hsa.miR.3202	8.42802	7.38827	6.85131	0.00885764	0.0247324	1.60673	UP
	hsa.miR.1249.5p	7.23427	6.97991	6.80607	0.00908486	0.0250416	1.60134	UP
	hsa.miR.6774.3p	5.69396	8.21895	6.3326	0.0118539	0.0322605	1.49133	UP
	hsa.miR.6873.3p	6.42578	7.06063	6.17558	0.0129526	0.03481	1.4583	UP
	hsa.miR.574.5p	-2.74178	12.4373	6.14367	0.0131883	0.035006	1.45586	DOWN
	hsa.miR.1908.3p	4.12361	8.71574	6.02459	0.0141079	0.0369903	1.43191	UP
	hsa.miR.8052	7.797	6.42249	5.85047	0.0155729	0.0399083	1.39894	UP
	hsa.miR.99a.5p	4.57989	6.79221	5.8483	0.0155921	0.0399083	1.39894	UP
	hsa.miR.365b.5p	7.79687	7.01389	5.82409	0.0158082	0.0399853	1.3981	UP
	hsa.let.7f.5p	-2.09683	16.8099	5.46853	0.0193619	0.0484046	1.31511	DOWN
	hsa.miR.30e.3p	-3.09149	9.73244	5.1622	0.0230836	0.0570458	1.24378	NO
	hsa.miR.382.5p	2.33946	10.9569	5.06333	0.0244372	0.0597045	1.22399	NO
	hsa.miR.432.5p	2.68907	10.1497	4.91795	0.026579	0.0642078	1.19241	NO
	hsa.miR.185.5p	-2.36182	11.3242	4.87173	0.0273001	0.0652168	1.18564	NO
	hsa.miR.93.5p	-2.50854	12.7926	4.80165	0.0284325	0.0671756	1.17279	NO
	hsa.miR.6089	5.21504	9.07895	4.73533	0.0295492	0.0690553	1.1608	NO
	hsa.miR.6126	3.47841	10.0277	4.65612	0.0309431	0.071535	1.14548	NO
	hsa.miR.7704	5.4508	8.67874	4.61095	0.0317684	0.0722051	1.14143	NO
	hsa.miR.92b.5p	-11.3919	7.75832	4.60362	0.0319046	0.0722051	1.14143	NO
	hsa.let.7g.5p	-1.98376	15.5611	4.55473	0.0328279	0.0735208	1.13359	NO
	hsa.let.7i.5p	-1.69277	17.2613	4.47071	0.0344806	0.0764261	1.11676	NO
	hsa.miR.155.5p	1.83601	12.8185	4.36468	0.0366914	0.080226	1.09568	NO
	hsa.miR.22.5p	4.53427	8.71443	4.35312	0.0369413	0.080226	1.09568	NO
	hsa.miR.6891.3p	5.29253	8.24927	4.05745	0.0439768	0.0945501	1.02434	NO
	hsa.miR.26a.5p	-1.863	14.1909	4.03385	0.0445962	0.0949325	1.02259	NO
	hsa.miR.1249.3p	5.06115	7.92471	3.87425	0.0490323	0.103352	0.98568	NO
	hsa.let.7b.5p	-1.62632	17.0807	3.81416	0.0508209	0.106083	0.974356	NO
	hsa.miR.5584.5p	4.23767	8.47221	3.74737	0.0528906	0.109341	0.961216	NO
	hsa.miR.10a.5p	-2.03057	11.9986	3.70872	0.054129	0.110836	0.955321	NO
	hsa.miR.6777.5p	4.45193	7.65646	3.59785	0.0578542	0.117346	0.930532	NO
	hsa.miR.4771	5.59529	8.06879	3.51624	0.0607701	0.122108	0.913255	NO
	hsa.let.7a.5p	-1.57509	18.1606	3.47178	0.0624243	0.124271	0.905632	NO
	hsa.miR.3135b	1.83539	10.2713	3.35853	0.0668579	0.130814	0.883346	NO
	hsa.miR.4448	5.13759	7.79678	3.3568	0.066928	0.130814	0.883346	NO
	hsa.miR.6724.5p	2.41791	8.97559	3.28201	0.0700431	0.135669	0.867519	NO
	hsa.miR.23b.3p	-2.51327	9.8598	3.0531	0.0805833	0.154691	0.810534	NO
	hsa.let.7d.5p	-1.43959	13.7905	2.96342	0.0851676	0.162045	0.790366	NO
	hsa.miR.4492	4.92291	7.18125	2.93803	0.0865161	0.163166	0.787369	NO
	hsa.miR.151a.5p	-1.71063	12.7249	2.82376	0.0928787	0.173643	0.760343	NO
	hsa.miR.6782.5p	4.66911	7.9843	2.80061	0.0942285	0.174648	0.757837	NO
	hsa.miR.149.5p	-2.0601	10.53	2.72337	0.0988889	0.181719	0.7406	NO
	hsa.miR.320a.3p	-1.27464	14.3054	2.59594	0.107138	0.195209	0.709501	NO
	hsa.miR.3162.5p	5.63612	7.06928	2.54937	0.110338	0.19935	0.700383	NO
	hsa.miR.532.3p	3.78701	7.70965	2.4087	0.120663	0.216187	0.66517	NO
	hsa.miR.4516	3.20702	8.74077	2.32447	0.127354	0.22629	0.645334	NO
	hsa.miR.142.3p	5.29664	6.35534	2.20552	0.137518	0.239434	0.620814	NO
	hsa.miR.4488	3.91176	7.28672	2.20126	0.137898	0.239434	0.620814	NO
	hsa.miR.4634	3.86006	7.58082	2.19909	0.138092	0.239434	0.620814	NO
	hsa.miR.6870.3p	5.11369	6.69844	2.18646	0.139229	0.239474	0.620741	NO
	hsa.miR.99b.5p	-1.76019	10.0357	2.11561	0.145804	0.248793	0.604162	NO
	hsa.miR.335.5p	-1.24787	12.9645	2.0819	0.149055	0.252337	0.598019	NO
	hsa.miR.7977	3.44928	8.08073	1.99058	0.158281	0.265862	0.575343	NO
	hsa.miR.1275	-2.06479	9.30415	1.92087	0.16576	0.276267	0.558671	NO
	hsa.miR.4706	4.25786	7.51795	1.82267	0.176996	0.292723	0.533543	NO
	hsa.miR.12136	2.36085	8.18591	1.76658	0.183806	0.301666	0.520474	NO
	hsa.miR.1908.5p	-2.10102	9.88081	1.72865	0.188583	0.307162	0.512633	NO
	hsa.miR.12116	3.86606	7.04595	1.68274	0.194561	0.311834	0.506077	NO
	hsa.miR.103a.3p	-1.34942	11.01	1.66886	0.196411	0.311834	0.506077	NO
	hsa.miR.103b	-1.34942	11.01	1.66886	0.196411	0.311834	0.506077	NO
	hsa.miR.130a.3p	-1.51828	10.0659	1.65694	0.198016	0.311834	0.506077	NO
	hsa.miR.21.5p	-1.79373	10.7291	1.65188	0.198703	0.311834	0.506077	NO
	hsa.miR.6730.5p	3.02103	8.53644	1.62839	0.201926	0.314595	0.502249	NO
	hsa.miR.92b.3p	-2.65301	8.68632	1.5319	0.215827	0.333834	0.47647	NO
	hsa.miR.493.3p	3.56093	6.53843	1.42409	0.232731	0.357409	0.446835	NO
	hsa.miR.6826.3p	3.45835	6.7089	1.34098	0.246861	0.37642	0.424328	NO
	hsa.miR.182.5p	-1.68081	9.79802	1.30368	0.253541	0.383883	0.415801	NO
	hsa.miR.125a.5p	-1.89783	9.206	1.21862	0.269632	0.405391	0.392125	NO
	hsa.miR.483.5p	2.41198	7.49938	1.17536	0.278303	0.415521	0.381407	NO
	hsa.miR.411.5p	2.77553	7.4893	1.16523	0.280384	0.415741	0.381177	NO
	hsa.miR.138.5p	1.96856	9.20527	1.15057	0.28343	0.41738	0.379469	NO
	hsa.miR.2392	2.67501	7.00079	1.14117	0.285406	0.417431	0.379416	NO
	hsa.miR.15b.5p	-1.61076	9.50735	1.08472	0.297643	0.432387	0.364127	NO
	hsa.miR.29a.3p	-1.28252	10.3568	0.991958	0.319264	0.460683	0.336597	NO
	hsa.miR.1180.3p	-1.03927	10.5165	0.890497	0.345343	0.494991	0.305403	NO
	hsa.miR.23a.3p	-1.07416	9.80188	0.837335	0.36016	0.512811	0.290043	NO
	hsa.miR.30c.5p	-1.81678	7.65537	0.81268	0.367329	0.519577	0.28435	NO
	hsa.miR.25.5p	-2.46824	6.96817	0.788334	0.374604	0.526405	0.27868	NO
	hsa.miR.98.5p	-0.727371	13.1742	0.770158	0.380168	0.530747	0.275112	NO
	hsa.miR.130b.3p	-1.43475	9.25935	0.76223	0.382632	0.530747	0.275112	NO
	hsa.miR.20a.5p	1.64106	8.15762	0.741589	0.389152	0.535278	0.27142	NO
	hsa.miR.1268b	0.929395	9.89548	0.729817	0.392942	0.535278	0.27142	NO
	hsa.miR.1307.3p	-1.49612	8.70753	0.728508	0.393367	0.535278	0.27142	NO
	hsa.miR.193b.5p	-1.69056	8.11311	0.667049	0.414082	0.557714	0.253588	NO
	hsa.miR.376c.3p	2.0287	7.94904	0.657876	0.417311	0.557714	0.253588	NO
	hsa.miR.4651	2.58782	6.62554	0.653249	0.418953	0.557714	0.253588	NO
	hsa.miR.34a.5p	1.02472	9.89657	0.64604	0.421532	0.557714	0.253588	NO
	hsa.miR.8485	1.60195	7.95892	0.639601	0.423855	0.557714	0.253588	NO
	hsa.miR.369.5p	2.13043	8.17615	0.635296	0.425419	0.557714	0.253588	NO
	hsa.miR.421	-1.75354	7.96022	0.532292	0.465645	0.606749	0.216991	NO
	hsa.miR.518b	-6.64208	6.43934	0.524097	0.469099	0.606896	0.216886	NO
	hsa.miR.4271	2.18254	6.44379	0.518686	0.471403	0.606896	0.216886	NO
	hsa.miR.423.5p	-0.558113	14.7289	0.488493	0.484601	0.613727	0.212025	NO
	hsa.miR.3184.3p	-0.558113	14.7289	0.488493	0.484601	0.613727	0.212025	NO
	hsa.miR.22.3p	-1.54428	8.01912	0.483222	0.486966	0.613727	0.212025	NO
	hsa.miR.6734.3p	-6.2655	6.88795	0.478656	0.489032	0.613727	0.212025	NO
	hsa.miR.7.5p	-0.914361	11.8286	0.468158	0.493836	0.613727	0.212025	NO
	hsa.miR.3529.3p	-0.914361	11.8286	0.468158	0.493836	0.613727	0.212025	NO
	hsa.miR.6879.5p	2.05811	6.60605	0.460925	0.497192	0.614346	0.211587	NO
	hsa.miR.30a.3p	-0.667473	12.0604	0.408458	0.522753	0.639092	0.194437	NO
	hsa.miR.125b.5p	-0.852605	9.25475	0.406024	0.523994	0.639092	0.194437	NO
	hsa.miR.6743.5p	-6.16668	5.85753	0.401849	0.526136	0.639092	0.194437	NO
	hsa.miR.100.5p	0.56083	12.56	0.384781	0.535056	0.644406	0.190841	NO
	hsa.miR.4429	1.32681	7.27843	0.382055	0.536505	0.644406	0.190841	NO
	hsa.miR.1260b	-0.925005	8.57084	0.371853	0.541996	0.644961	0.190466	NO
	hsa.miR.877.5p	-1.10178	8.56739	0.370067	0.542968	0.644961	0.190466	NO
	hsa.miR.744.5p	0.573809	11.2648	0.337304	0.56139	0.660127	0.180373	NO
	hsa.miR.29b.3p	-0.642955	10.743	0.336467	0.561875	0.660127	0.180373	NO
	hsa.miR.197.3p	-0.964134	8.55499	0.306215	0.580012	0.677732	0.168942	NO
	hsa.miR.143.3p	1.16042	7.75182	0.263023	0.608051	0.702958	0.15307	NO
	hsa.miR.181b.5p	0.6605	9.45231	0.26071	0.609633	0.702958	0.15307	NO
	hsa.miR.126.3p	-0.570738	10.8279	0.255608	0.613154	0.702958	0.15307	NO
	hsa.miR.6758.5p	1.5896	6.79111	0.253416	0.61468	0.702958	0.15307	NO
	hsa.miR.320d	0.405128	11.9045	0.235855	0.627216	0.708049	0.149937	NO
	hsa.miR.769.5p	-0.990166	7.64317	0.234111	0.628492	0.708049	0.149937	NO
	hsa.miR.31.5p	-0.743744	11.605	0.231792	0.630198	0.708049	0.149937	NO
	hsa.miR.17.5p	0.894327	7.77103	0.228949	0.632304	0.708049	0.149937	NO
	hsa.miR.320b	-0.389815	13.2045	0.223452	0.636422	0.708968	0.149374	NO
	hsa.miR.193a.5p	-0.590177	10.0186	0.180852	0.670642	0.741166	0.130084	NO
	hsa.miR.6786.5p	1.37527	7.11826	0.179016	0.672221	0.741166	0.130084	NO
	hsa.miR.320c	-0.362093	12.6858	0.170466	0.679698	0.745587	0.127502	NO
	hsa.miR.378a.3p	0.569432	9.00799	0.139508	0.708771	0.772558	0.112069	NO
	hsa.miR.221.3p	0.384978	10.5531	0.135255	0.713045	0.772558	0.112069	NO
	hsa.miR.184	-0.938492	7.86582	0.13327	0.715066	0.772558	0.112069	NO
	hsa.miR.671.5p	-0.565839	9.28959	0.11642	0.73295	0.785139	0.105054	NO
	hsa.miR.1268a	0.394486	9.68966	0.115458	0.734013	0.785139	0.105054	NO
	hsa.miR.24.3p	-0.485229	9.11528	0.0909395	0.762986	0.812089	0.0903963	NO
	hsa.miR.154.5p	0.552508	6.76127	0.0371978	0.847063	0.897136	0.0471419	NO
	hsa.miR.589.5p	0.420732	6.96833	0.0223298	0.881213	0.926391	0.0332059	NO
	hsa.miR.4723.3p	-1.82011	7.82577	0.0215455	0.883303	0.926391	0.0332059	NO
	hsa.miR.224.5p	0.187767	8.94159	0.0129377	0.909441	0.947938	0.0232201	NO
	hsa.miR.107	-0.153337	8.39224	0.012029	0.912666	0.947938	0.0232201	NO
	hsa.miR.92a.3p	0.116624	9.22789	0.00752394	0.930878	0.962205	0.0167323	NO
	hsa.miR.27a.3p	-0.0977056	8.62995	0.00355224	0.952474	0.979817	0.00885484	NO
	hsa.miR.181a.5p	0.0402191	9.58398	0.000855493	0.976666	0.99992	3.46974e-05	NO
	hsa.miR.30a.5p	0.0105601	8.17854	2.78137e-05	0.995792	1	0	NO
	hsa.miR.485.5p	0	6.51607	0	1	1	0	NO
	hsa.miR.3141	0	6.95905	0	1	1	0	NO
	hsa.miR.6825.5p	0	3.93153	0	1	1	0	NO
	hsa.miR.7113.5p	0	7.34947	0	1	1	0	NO

## Sheet: Table S4
Table S4. Differential miRNA Expression: Met5a_100k vs MSTO_100k
		logFC	logCPM	LR	PValue	FDR	adj-P	diffexp
	hsa.miR.548e.3p	12.9549	11.3002	52.722	3.84271e-13	8.26182e-11	10.0829	UP
	hsa.miR.6746.3p	16.2155	12.0305	48.7548	2.90043e-12	3.11796e-10	9.50613	UP
	hsa.miR.6867.5p	13.9663	9.8887	45.6275	1.43017e-11	1.02496e-09	8.9893	UP
	hsa.miR.3613.3p	14.4051	10.1178	42.9462	5.6265e-11	3.02424e-09	8.51938	UP
	hsa.miR.638	13.7708	8.8975	40.4465	2.02076e-10	8.68928e-09	8.06102	UP
	hsa.miR.6865.5p	14.7832	10.8031	39.9172	2.64953e-10	9.49416e-09	8.02254	UP
	hsa.miR.6503.5p	14.6767	11.124	38.7193	4.89342e-10	1.50298e-08	7.82305	UP
	hsa.miR.5193	15.2929	10.9435	37.7582	8.00777e-10	2.15209e-08	7.66714	UP
	hsa.miR.4713.5p	13.7134	11.1523	37.3314	9.96657e-10	2.3809e-08	7.62326	UP
	hsa.miR.153.5p	13.0502	10.2157	35.8807	2.09773e-09	4.51013e-08	7.34581	UP
	hsa.miR.765	13.349	9.48362	35.664	2.3446e-09	4.58263e-08	7.33889	UP
	hsa.miR.6731.5p	14.6103	9.52556	35.0782	3.16732e-09	5.67478e-08	7.24605	UP
	hsa.miR.5089.3p	13.9218	10.3764	32.1618	1.41854e-08	2.34605e-07	6.62966	UP
	hsa.miR.4458	12.4535	10.5378	29.4784	5.6544e-08	8.68354e-07	6.0613	UP
	hsa.miR.8060	11.1083	11.3391	27.7723	1.36464e-07	1.95598e-06	5.70863	UP
	hsa.miR.4757.3p	13.771	10.7963	26.4881	2.65171e-07	3.56323e-06	5.44816	UP
	hsa.miR.6801.3p	12.8151	8.20142	25.7873	3.81186e-07	4.82088e-06	5.31687	UP
	hsa.miR.1224.3p	12.296	7.83689	21.9216	2.84026e-06	3.39253e-05	4.46948	UP
	hsa.miR.6794.5p	11.4574	8.81328	21.7257	3.14555e-06	3.55943e-05	4.44862	UP
	hsa.miR.3945	12.1945	8.24887	20.6265	5.58185e-06	6.00048e-05	4.22181	UP
	hsa.miR.3960	3.901	12.9659	20.4297	6.18627e-06	6.05498e-05	4.21789	UP
	hsa.miR.3916	12.5586	9.82343	20.4267	6.19579e-06	6.05498e-05	4.21789	UP
	hsa.miR.3675.3p	12.7476	7.78637	20.1714	7.08025e-06	6.61849e-05	4.17924	UP
	hsa.miR.3126.3p	12.3268	9.10469	18.9355	1.35212e-05	0.000121127	3.91676	UP
	hsa.miR.99b.5p	-14.0375	10.0357	17.7781	2.48227e-05	0.000213475	3.67065	DOWN
	hsa.miR.483.5p	13.2481	7.49938	17.6064	2.71674e-05	0.000224654	3.64849	UP
	hsa.miR.30e.3p	-14.0642	9.73244	17.1721	3.41407e-05	0.000262476	3.58091	DOWN
	hsa.miR.6717.5p	7.3526	11.0193	17.1698	3.4183e-05	0.000262476	3.58091	UP
	hsa.miR.3147	11.9575	6.80947	17.0065	3.72529e-05	0.000276186	3.5588	UP
	hsa.miR.6837.3p	11.8896	8.6271	16.8576	4.02916e-05	0.000288757	3.53947	UP
	hsa.miR.1246	4.60333	12.3409	16.521	4.81138e-05	0.000333692	3.47665	UP
	hsa.miR.6796.3p	10.5211	8.19825	16.2431	5.57107e-05	0.000374306	3.42677	UP
	hsa.miR.10400.5p	7.82313	9.32399	16.1212	5.9416e-05	0.000387104	3.41217	UP
	hsa.miR.6795.5p	10.4668	7.72822	15.6807	7.49849e-05	0.000473377	3.32479	UP
	hsa.miR.1290	3.68695	12.603	15.6291	7.70614e-05	0.000473377	3.32479	UP
	hsa.miR.657	12.7033	7.1598	15.4108	8.64935e-05	0.000506225	3.29566	UP
	hsa.miR.6803.5p	10.7859	8.18496	15.3972	8.71178e-05	0.000506225	3.29566	UP
	hsa.miR.4700.5p	10.7962	7.60117	14.7528	0.000122563	0.000693448	3.15899	UP
	hsa.miR.4634	13.2328	7.58082	14.0095	0.00018189	0.00100273	2.99882	UP
	hsa.miR.122.5p	4.91574	11.456	13.9254	0.000190213	0.0010224	2.99038	UP
	hsa.miR.376a.3p	11.7096	7.81106	13.7857	0.000204886	0.0010744	2.96883	UP
	hsa.let.7f.2.3p	11.7666	7.58935	13.7062	0.000213744	0.00109417	2.96092	UP
	hsa.miR.411.3p	9.20813	7.33112	13.4016	0.000251409	0.00125704	2.90065	UP
	hsa.miR.1249.5p	11.3864	6.97991	13.3227	0.000262205	0.00128123	2.89237	UP
	hsa.miR.519d.5p	12.3645	6.42369	13.1721	0.000284145	0.00135758	2.86723	UP
	hsa.miR.4448	12.9344	7.79678	13.0478	0.000303648	0.00141922	2.84795	UP
	hsa.miR.23a.5p	11.71	8.19828	12.9874	0.000313601	0.00143456	2.84328	UP
	hsa.miR.7847.3p	7.3093	10.6619	12.837	0.000339833	0.00149154	2.82637	UP
	hsa.miR.1908.5p	-14.3369	9.88081	12.8364	0.000339932	0.00149154	2.82637	DOWN	hsa.miR.1908.5p
	hsa.miR.5584.5p	9.57514	8.47221	12.411	0.00042681	0.00183528	2.7363	UP
	hsa.miR.524.3p	12.2936	7.52146	12.186	0.000481488	0.0020298	2.69255	UP
	hsa.miR.3141	10.7987	6.95905	12.1099	0.000501553	0.00207373	2.68325	UP
	hsa.miR.525.3p	12.2935	7.59182	11.9285	0.000552815	0.00224255	2.64926	UP
	hsa.miR.548h.5p	13.0386	6.60989	11.8443	0.000578377	0.0023028	2.63774	UP
	hsa.miR.4723.3p	10.8237	7.82577	11.5566	0.000675077	0.00263894	2.57857	UP
	hsa.miR.4763.3p	11.8918	7.11423	11.474	0.000705759	0.00270961	2.56709	UP
	hsa.miR.1275	-13.0703	9.30415	11.3518	0.000753764	0.00284315	2.5462	DOWN	hsa.miR.1275
	hsa.miR.6727.5p	11.8996	6.46283	11.2771	0.0007847	0.0029088	2.53629	UP
	hsa.miR.342.3p	6.0875	12.2554	10.8801	0.000972012	0.00354208	2.45074	UP
	hsa.miR.3202	11.1237	7.38827	10.7592	0.00103764	0.00371821	2.42967	UP
	hsa.miR.8052	12.8971	6.42249	10.5199	0.00118096	0.00413798	2.38321	UP
	hsa.miR.4492	11.9799	7.18125	10.5007	0.00119328	0.00413798	2.38321	UP
	hsa.miR.483.3p	10.3237	6.97856	10.4535	0.00122415	0.00417765	2.37907	UP
	hsa.miR.130b.3p	-13.6244	9.25935	10.2703	0.00135187	0.00451682	2.34517	DOWN	hsa.miR.130b.3p
	hsa.miR.122b.3p	4.92443	11.3817	10.2364	0.00137693	0.00451682	2.34517	UP
	hsa.miR.2861	10.6066	7.41498	10.2236	0.00138656	0.00451682	2.34517	UP
	hsa.miR.154.5p	10.1172	6.76127	10.1706	0.00142694	0.00457899	2.33923	UP
	hsa.miR.125b.5p	-12.303	9.25475	9.93752	0.00161944	0.00512028	2.29071	DOWN
	hsa.miR.4695.3p	6.47694	8.49021	9.8374	0.00170999	0.0052168	2.2826	UP
	hsa.miR.3195	10.8334	7.65057	9.83665	0.00171068	0.0052168	2.2826	UP
	hsa.miR.155.5p	2.80672	12.8185	9.82372	0.00172276	0.0052168	2.2826	UP
	hsa.miR.7113.5p	9.37134	7.34947	9.76036	0.00178315	0.0052871	2.27678	UP
	hsa.miR.22.5p	7.97038	8.71443	9.74802	0.00179516	0.0052871	2.27678	UP
	hsa.miR.4271	12.1276	6.44379	9.48979	0.00206618	0.00600309	2.22163	UP
	hsa.miR.518b	12.091	6.43934	9.37662	0.0021977	0.00630007	2.20065	UP
	hsa.miR.574.5p	-3.51209	12.4373	9.20676	0.00241123	0.00682125	2.16614	DOWN
	hsa.miR.1183	11.0944	6.65206	9.16433	0.00246777	0.00689054	2.16175	UP
	hsa.miR.125a.5p	-12.9332	9.206	8.663	0.00324736	0.00890913	2.05016	DOWN
	hsa.miR.6760.5p	10.6083	7.15907	8.64834	0.00327359	0.00890913	2.05016	UP
	hsa.miR.107	-11.8992	8.39224	8.20178	0.00418494	0.011247	1.94896	DOWN
	hsa.miR.185.5p	-3.18525	11.3242	8.06795	0.0045055	0.011959	1.9223	DOWN
	hsa.miR.191.5p	-2.5657	13.3221	7.99553	0.0046893	0.0122737	1.91102	DOWN
	hsa.miR.99a.5p	5.59482	6.79221	7.97673	0.00473823	0.0122737	1.91102	UP
	hsa.miR.142.3p	11.8932	6.35534	7.90212	0.0049377	0.0126382	1.89832	UP
	hsa.miR.6743.5p	10.9734	5.85753	7.71549	0.0054749	0.0138102	1.8598	UP
	hsa.miR.6873.3p	7.4447	7.06063	7.69934	0.0055241	0.0138102	1.8598	UP
	hsa.miR.4787.5p	3.26862	9.60119	7.66805	0.0056207	0.0138902	1.85729	UP
	hsa.miR.196a.5p	-4.1361	11.2975	7.56393	0.00595482	0.0145487	1.83718	DOWN
	hsa.let.7e.5p	-2.42464	15.0721	7.42073	0.00644765	0.0155758	1.80755	DOWN
	hsa.let.7c.5p	2.67848	12.2717	7.19439	0.0073132	0.0174704	1.7577	UP
	hsa.miR.1207.5p	7.75783	7.65449	7.01304	0.00809183	0.0191181	1.71856	UP
	hsa.let.7d.5p	-2.29577	13.7905	6.91516	0.00854682	0.0199735	1.69954	DOWN
	hsa.miR.30c.5p	-11.9011	7.65537	5.73675	0.0166135	0.0384077	1.41558	DOWN
	hsa.miR.8485	5.21781	7.95892	5.63819	0.0175733	0.0401943	1.39584	UP
	hsa.miR.432.5p	2.86685	10.1497	5.54775	0.0185044	0.0418785	1.37801	UP
	hsa.miR.7704	5.89273	8.67874	5.20248	0.0225547	0.0505131	1.2966	NO
	hsa.let.7f.5p	-2.02941	16.8099	5.1563	0.0231622	0.0513389	1.28955	NO
	hsa.miR.6892.3p	5.8947	8.71485	4.87717	0.0272141	0.0597045	1.22399	NO
	hsa.miR.25.5p	-12.4613	6.96817	4.71701	0.0298656	0.0648596	1.18803	NO
	hsa.miR.4747.3p	3.74819	10.4897	4.58825	0.0321919	0.0692126	1.15981	NO
	hsa.miR.22.3p	-11.6115	8.01912	4.52876	0.0333298	0.0703394	1.1528	NO
	hsa.miR.149.5p	-2.76589	10.53	4.52668	0.0333703	0.0703394	1.1528	NO
	hsa.let.7g.5p	-1.95322	15.5611	4.42785	0.0353569	0.0738033	1.13192	NO
	hsa.miR.93.5p	-2.3849	12.7926	4.39213	0.0361052	0.0746406	1.12702	NO
	hsa.miR.16.5p	-1.88204	14.8836	4.22682	0.03979	0.0814747	1.08898	NO
	hsa.miR.182.5p	-3.35447	9.79802	4.17827	0.0409454	0.0830496	1.08066	NO
	hsa.miR.184	-11.845	7.86582	3.82523	0.0504863	0.101444	0.993772	NO
	hsa.miR.411.5p	5.47259	7.4893	3.79376	0.0514439	0.102411	0.989652	NO
	hsa.miR.1908.3p	3.13522	8.71574	3.74946	0.0528245	0.104195	0.982153	NO
	hsa.miR.98.5p	-1.66592	13.1742	3.71436	0.0539463	0.10544	0.976993	NO
	hsa.let.7b.5p	-1.58518	17.0807	3.63722	0.0565012	0.109383	0.96105	NO
	hsa.let.7i.5p	-1.51123	17.2613	3.62315	0.056981	0.109383	0.96105	NO
	hsa.miR.320a.3p	-1.49983	14.3054	3.52249	0.0605415	0.11519	0.938587	NO
	hsa.miR.6089	4.32274	9.07895	3.50669	0.0611213	0.115273	0.938274	NO
	hsa.miR.6724.5p	2.42617	8.97559	3.30836	0.0689283	0.128866	0.889862	NO
	hsa.let.7a.5p	-1.47109	18.1606	3.05708	0.080386	0.147601	0.830911	NO
	hsa.miR.127.3p	2.41894	9.66717	3.04581	0.0809457	0.147601	0.830911	NO
	hsa.miR.12136	-9.66213	8.18591	3.04454	0.0810089	0.147601	0.830911	NO
	hsa.miR.493.3p	4.91062	6.53843	2.50822	0.113254	0.204618	0.689055	NO
	hsa.miR.4516	3.30013	8.74077	2.45648	0.11704	0.209698	0.678407	NO
	hsa.miR.6869.5p	3.46122	7.9484	2.3444	0.125734	0.223085	0.651529	NO
	hsa.miR.138.5p	-9.04035	9.20527	2.33386	0.126588	0.223085	0.651529	NO
	hsa.miR.7977	3.73874	8.08073	2.30479	0.128975	0.225445	0.64696	NO
	hsa.miR.28.3p	-2.00106	10.1752	2.25512	0.133173	0.230282	0.637741	NO
	hsa.miR.29b.3p	-1.75321	10.743	2.24687	0.133885	0.230282	0.637741	NO
	hsa.miR.6782.5p	-9.93758	7.9843	2.23226	0.135156	0.230623	0.637098	NO
	hsa.miR.100.5p	1.31289	12.56	2.12529	0.144885	0.244285	0.612103	NO
	hsa.miR.6880.5p	3.39831	6.82393	2.11949	0.145435	0.244285	0.612103	NO
	hsa.miR.26a.5p	-1.30572	14.1909	2.08505	0.148747	0.247912	0.605703	NO
	hsa.miR.1249.3p	3.42546	7.92471	1.99192	0.15814	0.261539	0.582464	NO
	hsa.miR.6879.5p	4.72298	6.60605	1.9766	0.159749	0.262183	0.581395	NO
	hsa.miR.130a.3p	-1.68808	10.0659	1.96317	0.161175	0.262278	0.581238	NO
	hsa.miR.27a.3p	-2.69734	8.62995	1.94918	0.162675	0.262278	0.581238	NO
	hsa.miR.103a.3p	-1.45868	11.01	1.93066	0.164686	0.262278	0.581238	NO
	hsa.miR.103b	-1.45868	11.01	1.93066	0.164686	0.262278	0.581238	NO
	hsa.miR.20a.5p	2.60319	8.15762	1.8084	0.1787	0.279344	0.553861	NO
	hsa.miR.181a.5p	-2.05354	9.58398	1.80532	0.17907	0.279344	0.553861	NO
	hsa.miR.151a.5p	-1.34374	12.7249	1.80342	0.1793	0.279344	0.553861	NO
	hsa.miR.31.5p	-2.13343	11.605	1.67676	0.195356	0.297612	0.52635	NO
	hsa.miR.320c	-1.17036	12.6858	1.67594	0.195465	0.297612	0.52635	NO
	hsa.miR.7.5p	-1.79551	11.8286	1.66774	0.196562	0.297612	0.52635	NO
	hsa.miR.3529.3p	-1.79551	11.8286	1.66774	0.196562	0.297612	0.52635	NO
	hsa.miR.6126	1.98166	10.0277	1.62867	0.201887	0.303537	0.517789	NO
	hsa.miR.1268b	1.36362	9.89548	1.60398	0.20534	0.306584	0.513451	NO
	hsa.miR.4771	3.23471	8.06879	1.4075	0.235472	0.349148	0.45699	NO
	hsa.miR.10a.5p	-1.19335	11.9986	1.38346	0.239513	0.352708	0.452585	NO
	hsa.miR.6758.5p	-9.0351	6.79111	1.34521	0.246118	0.358611	0.445376	NO
	hsa.miR.92b.3p	-2.42617	8.68632	1.341	0.246858	0.358611	0.445376	NO
	hsa.miR.193a.5p	-1.66618	10.0186	1.27652	0.258547	0.373071	0.428209	NO
	hsa.miR.1268a	1.21818	9.68966	1.14917	0.283724	0.406671	0.390757	NO
	hsa.miR.423.5p	-0.82496	14.7289	1.04744	0.306097	0.432966	0.363546	NO
	hsa.miR.3184.3p	-0.82496	14.7289	1.04744	0.306097	0.432966	0.363546	NO
	hsa.miR.15b.5p	-1.54392	9.50735	0.992079	0.319235	0.448598	0.348143	NO
	hsa.miR.6777.5p	-7.33253	7.65646	0.970098	0.324656	0.453253	0.343659	NO
	hsa.miR.335.5p	-0.801675	12.9645	0.890586	0.345319	0.476121	0.322283	NO
	hsa.miR.589.5p	2.63251	6.96833	0.890048	0.345464	0.476121	0.322283	NO
	hsa.miR.4488	2.29435	7.28672	0.819309	0.365382	0.500364	0.300714	NO
	hsa.miR.369.5p	2.08203	8.17615	0.695298	0.404368	0.550248	0.259442	NO
	hsa.miR.30a.5p	1.61731	8.17854	0.679297	0.409829	0.554171	0.256356	NO
	hsa.miR.3135b	0.822869	10.2713	0.661715	0.415955	0.55894	0.252635	NO
	hsa.miR.671.5p	-1.37741	9.28959	0.651431	0.419602	0.560337	0.25155	NO
	hsa.miR.197.3p	-1.37504	8.55499	0.593161	0.441199	0.585542	0.232442	NO
	hsa.miR.92a.3p	1.01402	9.22789	0.581696	0.445648	0.587818	0.230757	NO
	hsa.miR.6730.5p	1.7458	8.53644	0.564058	0.45263	0.593387	0.226662	NO
	hsa.miR.17.5p	1.30321	7.77103	0.491294	0.483351	0.62982	0.200783	NO
	hsa.miR.320d	-0.594634	11.9045	0.480652	0.488127	0.632213	0.199137	NO
	hsa.miR.21.5p	-0.917933	10.7291	0.467266	0.494248	0.636307	0.196333	NO
	hsa.miR.320b	-0.50737	13.2045	0.375892	0.53981	0.685942	0.163713	NO
	hsa.miR.23b.3p	-0.809608	9.8598	0.37377	0.540956	0.685942	0.163713	NO
	hsa.miR.3162.5p	-5.80558	7.06928	0.368143	0.544018	0.685942	0.163713	NO
	hsa.miR.6891.3p	-1.70966	8.24927	0.365326	0.545563	0.685942	0.163713	NO
	hsa.miR.29a.3p	-0.740427	10.3568	0.345107	0.556896	0.693657	0.158855	NO
	hsa.miR.382.5p	-0.681628	10.9569	0.342914	0.558152	0.693657	0.158855	NO
	hsa.miR.877.5p	-0.987826	8.56739	0.304779	0.580902	0.717781	0.144008	NO
	hsa.miR.532.3p	-5.07034	7.70965	0.274437	0.600371	0.737598	0.13218	NO
	hsa.miR.24.3p	0.717069	9.11528	0.210348	0.646494	0.789752	0.102509	NO
	hsa.miR.92b.5p	-0.885613	7.75832	0.196568	0.657506	0.796833	0.0986326	NO
	hsa.miR.23a.3p	-0.506688	9.80188	0.193884	0.659704	0.796833	0.0986326	NO
	hsa.miR.1307.3p	-0.667781	8.70753	0.15628	0.692605	0.8319	0.0799288	NO
	hsa.miR.5196.5p	1.01397	7.59281	0.132141	0.716222	0.855487	0.0677864	NO
	hsa.miR.744.5p	0.348208	11.2648	0.123293	0.72549	0.85958	0.0657139	NO
	hsa.miR.34a.5p	0.447457	9.89657	0.121286	0.727644	0.85958	0.0657139	NO
	hsa.miR.1180.3p	-0.305451	10.5165	0.0806462	0.776424	0.912192	0.0399139	NO
	hsa.miR.126.3p	-0.274402	10.8279	0.0607099	0.805377	0.936201	0.0286309	NO
	hsa.miR.193b.5p	-0.478331	8.11311	0.0598078	0.8068	0.936201	0.0286309	NO
	hsa.miR.4651	0.803907	6.62554	0.0566247	0.811913	0.936201	0.0286309	NO
	hsa.miR.328.5p	-2.79451	6.80978	0.0551836	0.814277	0.936201	0.0286309	NO
	hsa.miR.181b.5p	-0.229966	9.45231	0.0301952	0.862048	0.985853	0.00618788	NO
	hsa.miR.6788.3p	-1.84563	6.63255	0.0239354	0.87705	0.996921	0.00133917	NO
	hsa.miR.6124	-1.8089	8.02172	0.0224105	0.881	0.996921	0.00133917	NO
	hsa.miR.143.3p	0.326672	7.75182	0.0204291	0.886345	0.997718	0.000992071	NO
	hsa.miR.1260b	0.135827	8.57084	0.00894863	0.924635	1	0	NO
	hsa.miR.6734.3p	-0.790845	6.88795	0.0083098	0.927367	1	0	NO
	hsa.miR.4706	-0.74735	7.51795	0.00779594	0.929643	1	0	NO
	hsa.miR.224.5p	0.129843	8.94159	0.00616941	0.937394	1	0	NO
	hsa.miR.7107.5p	-0.194907	6.59523	0.00445489	0.946785	1	0	NO
	hsa.miR.769.5p	-0.122433	7.64317	0.00394006	0.94995	1	0	NO
	hsa.miR.421	0.139161	7.96022	0.00392402	0.950052	1	0	NO
	hsa.miR.30a.3p	0.0568275	12.0604	0.00308814	0.955684	1	0	NO
	hsa.miR.221.3p	0.0545054	10.5531	0.00266605	0.958821	1	0	NO
	hsa.miR.378a.3p	-0.0344247	9.00799	0.0004959	0.982234	1	0	NO
	hsa.miR.4429	0.0111503	7.27843	2.9747e-05	0.995648	1	0	NO
	hsa.miR.365a.5p	0	7.61547	0	1	1	0	NO
	hsa.miR.365b.5p	0	7.01389	0	1	1	0	NO
	hsa.miR.376c.3p	0	7.94904	0	1	1	0	NO
	hsa.miR.485.5p	0	6.51607	0	1	1	0	NO
	hsa.miR.2392	0	7.00079	0	1	1	0	NO
	hsa.miR.6772.3p	0	7.61358	0	1	1	0	NO
	hsa.miR.6774.3p	0	8.21895	0	1	1	0	NO
	hsa.miR.6786.5p	0	7.11826	0	1	1	0	NO
	hsa.miR.6825.5p	0	3.93153	0	1	1	0	NO
	hsa.miR.6826.3p	0	6.7089	0	1	1	0	NO
	hsa.miR.6870.3p	0	6.69844	0	1	1	0	NO
	hsa.miR.7110.5p	0	7.07541	0	1	1	0	NO
	hsa.miR.12116	0	7.04595	0	1	1	0	NO

## Sheet: Table S5
Table S5. Differential miRNA Expression: Met5a_2.8k vs VMC23_2.8k
		logFC	logCPM	LR	PValue	FDR	adj-P	diffexp
	hsa.miR.548e.3p	14.8277	11.3002	70.7061	4.14617e-17	8.91426e-15	14.0499	UP
	hsa.miR.6746.3p	15.9528	12.0305	52.4449	4.42493e-13	3.20329e-11	10.4944	UP
	hsa.miR.6867.5p	14.3089	9.8887	52.4251	4.4697e-13	3.20329e-11	10.4944	UP
	hsa.miR.8060	16.3408	11.3391	50.3691	1.27385e-12	6.84696e-11	10.1645	UP
	hsa.miR.3613.3p	14.0304	10.1178	46.2379	1.04731e-11	4.09052e-10	9.38822	UP
	hsa.miR.6717.5p	15.2956	11.0193	46.0691	1.14154e-11	4.09052e-10	9.38822	UP
	hsa.miR.6503.5p	15.5064	11.124	45.545	1.49171e-11	4.58168e-10	9.33898	UP
	hsa.miR.153.5p	14.1011	10.2157	44.1711	3.00893e-11	8.0865e-10	9.09224	UP
	hsa.miR.4713.5p	13.7169	11.1523	41.7144	1.05628e-10	2.52333e-09	8.59803	UP
	hsa.miR.6865.5p	13.7456	10.8031	39.3937	3.46416e-10	7.44794e-09	8.12796	UP
	hsa.miR.5089.3p	14.3346	10.3764	36.9311	1.22378e-09	2.39193e-08	7.62125	UP
	hsa.miR.6731.5p	13.4099	9.52556	35.2451	2.90719e-09	5.20872e-08	7.28327	UP
	hsa.miR.765	11.6053	9.48362	32.4646	1.21381e-08	1.917e-07	6.71738	UP
	hsa.miR.638	10.7973	8.8975	32.4102	1.24828e-08	1.917e-07	6.71738	UP
	hsa.miR.4747.3p	13.5377	10.4897	31.9435	1.58724e-08	2.27504e-07	6.64301	UP
	hsa.miR.6801.3p	13.3057	8.20142	30.1331	4.03389e-08	5.42055e-07	6.26596	UP
	hsa.miR.6794.5p	13.3509	8.81328	29.4421	5.7611e-08	7.15658e-07	6.14529	UP
	hsa.miR.6892.3p	13.6139	8.71485	29.3661	5.99156e-08	7.15658e-07	6.14529	UP
	hsa.miR.4757.3p	13.6178	10.7963	29.067	6.99187e-08	7.91185e-07	6.10172	UP
	hsa.miR.4458	10.4352	10.5378	25.6114	4.17572e-07	4.4889e-06	5.34786	UP
	hsa.miR.335.5p	-4.34551	12.9645	25.5077	4.40612e-07	4.51103e-06	5.34572	DOWN
	hsa.miR.3916	13.7517	9.82343	25.2311	5.08552e-07	4.96994e-06	5.30365	UP
	hsa.miR.3945	12.6564	8.24887	24.2105	8.63597e-07	8.07275e-06	5.09298	UP
	hsa.miR.196a.5p	-7.00479	11.2975	22.8871	1.718e-06	1.48395e-05	4.82858	DOWN
	hsa.miR.6772.3p	12.8096	7.61358	22.8787	1.72552e-06	1.48395e-05	4.82858	UP
	hsa.miR.6795.5p	12.348	7.72822	22.5645	2.03208e-06	1.68037e-05	4.7746	UP
	hsa.miR.3675.3p	12.3914	7.78637	21.8459	2.95454e-06	2.34245e-05	4.63033	UP
	hsa.miR.411.3p	11.8939	7.33112	21.7844	3.05063e-06	2.34245e-05	4.63033	UP
	hsa.miR.6796.3p	11.9537	8.19825	21.5786	3.39627e-06	2.51793e-05	4.59896	UP
	hsa.miR.6774.3p	12.3985	8.21895	21.1059	4.34581e-06	3.1145e-05	4.50661	UP
	hsa.miR.5584.5p	12.345	8.47221	20.4816	6.02079e-06	4.17571e-05	4.37927	UP
	hsa.miR.4700.5p	12.6523	7.60117	20.0554	7.52294e-06	5.05448e-05	4.29632	UP
	hsa.miR.6124	11.9277	8.02172	19.8302	8.46371e-06	5.51423e-05	4.25851	UP
	hsa.miR.1224.3p	10.4572	7.83689	18.9421	1.34748e-05	8.52081e-05	4.06952	UP
	hsa.miR.3147	11.8264	6.80947	18.8861	1.38762e-05	8.52397e-05	4.06936	UP
	hsa.miR.6837.3p	11.7593	8.6271	18.7972	1.45378e-05	8.6823e-05	4.06137	UP
	hsa.miR.6869.5p	12.503	7.9484	18.6334	1.5842e-05	9.20548e-05	4.03595	UP
	hsa.miR.382.5p	4.51747	10.9569	18.3806	1.80892e-05	0.000102347	3.98993	UP
	hsa.miR.1207.5p	13.2875	7.65449	16.9343	3.86963e-05	0.000213326	3.67096	UP
	hsa.miR.130b.3p	-14.269	9.25935	16.338	5.29908e-05	0.000284825	3.54542	DOWN	hsa.miR.130b.3p
	hsa.miR.6734.3p	12.7092	6.88795	15.3436	8.9626e-05	0.000468772	3.32904	UP
	hsa.miR.376c.3p	12.1067	7.94904	15.2945	9.19822e-05	0.000468772	3.32904	UP
	hsa.miR.127.3p	5.9015	9.66717	15.2585	9.37544e-05	0.000468772	3.32904	UP
	hsa.miR.10a.5p	-3.79457	11.9986	15.0792	0.000103092	0.000503743	3.29779	DOWN	hsa.miR.10a.5p
	hsa.miR.16.5p	-3.18055	14.8836	14.7225	0.000124548	0.000595064	3.22544	DOWN	hsa.miR.16.5p
	hsa.miR.3202	13.3662	7.38827	14.6103	0.000132193	0.0006127	3.21275	UP
	hsa.let.7f.5p	-3.04798	16.8099	14.5479	0.000136644	0.0006127	3.21275	DOWN
	hsa.miR.4695.3p	8.40471	8.49021	14.5459	0.000136789	0.0006127	3.21275	UP
	hsa.miR.154.5p	11.9597	6.76127	13.9134	0.000191425	0.000839926	3.07576	UP
	hsa.miR.519d.5p	11.4642	6.42369	13.5669	0.00023021	0.000974672	3.01114	UP
	hsa.miR.432.5p	4.51109	10.1497	13.5588	0.000231201	0.000974672	3.01114	UP
	hsa.miR.5193	6.51973	10.9435	13.5172	0.000236389	0.000977379	3.00994	UP
	hsa.miR.2861	12.2051	7.41498	13.3998	0.000251648	0.00100468	2.99797	UP
	hsa.let.7f.2.3p	10.2986	7.58935	13.3947	0.000252338	0.00100468	2.99797	UP
	hsa.miR.342.3p	6.78988	12.2554	13.3251	0.000261876	0.00100543	2.99765	UP
	hsa.miR.3960	2.89592	12.9659	13.3197	0.000262627	0.00100543	2.99765	UP
	hsa.miR.6891.3p	10.4913	8.24927	13.2919	0.000266556	0.00100543	2.99765	UP
	hsa.miR.4771	12.5613	8.06879	12.9999	0.000311506	0.00115472	2.93752	UP
	hsa.miR.191.5p	-2.80696	13.3221	12.9235	0.000324485	0.00118245	2.92722	DOWN
	hsa.miR.6727.5p	11.961	6.46283	12.6624	0.000373078	0.00133686	2.87391	UP
	hsa.miR.6126	6.22169	10.0277	12.5932	0.000387162	0.00136459	2.865	UP
	hsa.miR.3195	12.1998	7.65057	12.5408	0.000398157	0.0013807	2.8599	UP
	hsa.miR.483.3p	10.5734	6.97856	12.2722	0.00045976	0.00156902	2.80437	UP
	hsa.miR.3126.3p	8.60266	9.10469	12.04	0.000520714	0.00174927	2.75714	UP
	hsa.miR.525.3p	10.8495	7.59182	11.6582	0.000639204	0.00209669	2.67846	UP
	hsa.miR.4763.3p	10.8496	7.11423	11.6453	0.000643636	0.00209669	2.67846	UP
	hsa.miR.6788.3p	11.0857	6.63255	11.5946	0.000661435	0.00212252	2.67315	UP
	hsa.miR.1249.3p	10.1629	7.92471	11.3016	0.000774413	0.00244851	2.6111	UP
	hsa.miR.93.5p	-3.3989	12.7926	11.2283	0.000805598	0.0025102	2.60029	DOWN
	hsa.let.7d.5p	-2.5114	13.7905	11.1487	0.000840899	0.00256496	2.59092	DOWN
	hsa.miR.6782.5p	11.4321	7.9843	11.1352	0.000847034	0.00256496	2.59092	UP
	hsa.miR.26a.5p	-2.7135	14.1909	10.8277	0.000999928	0.0029859	2.52493	DOWN
	hsa.miR.6760.5p	11.5857	7.15907	10.6777	0.00108432	0.00317754	2.49791	UP
	hsa.miR.6730.5p	9.41734	8.53644	10.6376	0.00110812	0.00317754	2.49791	UP
	hsa.miR.518b	12.3489	6.43934	10.637	0.00110844	0.00317754	2.49791	UP
	hsa.miR.524.3p	9.7672	7.52146	10.5878	0.00113838	0.00318482	2.49692	UP
	hsa.miR.493.3p	11.4555	6.53843	10.5842	0.00114061	0.00318482	2.49692	UP
	hsa.miR.328.5p	10.5355	6.80978	10.5366	0.00117033	0.00322592	2.49135	UP
	hsa.let.7g.5p	-2.65133	15.5611	10.4756	0.00120963	0.00326917	2.48556	DOWN
	hsa.miR.7847.3p	6.12258	10.6619	10.4257	0.00124274	0.00326917	2.48556	UP
	hsa.miR.7.5p	-4.32109	11.8286	10.3998	0.0012603	0.00326917	2.48556	DOWN
	hsa.miR.3529.3p	-4.32109	11.8286	10.3998	0.0012603	0.00326917	2.48556	DOWN
	hsa.miR.1183	11.1981	6.65206	10.3972	0.00126205	0.00326917	2.48556	UP
	hsa.miR.5196.5p	10.3484	7.59281	10.1319	0.00145726	0.00372988	2.4283	UP
	hsa.miR.122b.3p	4.67926	11.3817	10.0403	0.00153152	0.00387383	2.41186	UP
	hsa.miR.138.5p	6.5302	9.20527	9.8625	0.00168681	0.00421704	2.37499	UP
	hsa.miR.365b.5p	10.4189	7.01389	9.3835	0.00218947	0.00541077	2.26674	UP
	hsa.miR.6786.5p	10.6425	7.11826	9.22811	0.00238328	0.00582279	2.23487	UP
	hsa.miR.3141	8.49014	6.95905	9.06957	0.00259899	0.00627845	2.20215	UP
	hsa.miR.6870.3p	11.3043	6.69844	8.72132	0.0031451	0.0075133	2.12417	UP
	hsa.miR.4651	10.8736	6.62554	8.63596	0.00329591	0.00778705	2.10863	UP
	hsa.miR.6826.3p	9.17857	6.7089	8.40866	0.00373438	0.00862759	2.06411	UP
	hsa.miR.185.5p	-2.69468	11.3242	8.40056	0.00375106	0.00862759	2.06411	DOWN
	hsa.miR.30e.3p	-3.31739	9.73244	8.39041	0.00377206	0.00862759	2.06411	DOWN
	hsa.miR.6879.5p	11.0792	6.60605	8.2229	0.00413649	0.0092962	2.03169	UP
	hsa.miR.4271	9.38437	6.44379	8.21661	0.00415086	0.0092962	2.03169	UP
	hsa.miR.122.5p	3.40976	11.456	8.1695	0.00426005	0.00944239	2.02492	UP
	hsa.miR.30c.5p	-11.9036	7.65537	8.00311	0.00466971	0.0102448	1.9895	DOWN
	hsa.miR.1908.3p	4.63903	8.71574	7.92164	0.0048847	0.0106082	1.97436	UP
	hsa.miR.4723.3p	7.60165	7.82577	7.83247	0.0051316	0.011033	1.95731	UP
	hsa.miR.6803.5p	6.08226	8.18496	7.14233	0.00752853	0.0160261	1.79517	UP
	hsa.miR.151a.5p	-2.36924	12.7249	6.94357	0.00841212	0.0177314	1.75126	DOWN
	hsa.let.7e.5p	-1.91689	15.0721	6.60952	0.0101435	0.0211734	1.67421	DOWN
	hsa.miR.10400.5p	4.11747	9.32399	6.54899	0.0104944	0.0216865	1.66381	UP
	hsa.miR.6743.5p	8.22982	5.85753	6.53267	0.0105911	0.0216865	1.66381	UP
	hsa.miR.12116	8.72825	7.04595	6.42427	0.0112571	0.0228329	1.64144	UP
	hsa.miR.7107.5p	8.03291	6.59523	6.14138	0.0132054	0.0265342	1.57619	UP
	hsa.miR.7113.5p	6.72022	7.34947	5.94045	0.0147973	0.0294575	1.5308	UP
	hsa.miR.574.5p	-2.19628	12.4373	5.72883	0.0166886	0.0329179	1.48257	DOWN
	hsa.miR.130a.3p	-2.47529	10.0659	5.49165	0.0191075	0.0373465	1.42775	DOWN
	hsa.miR.6089	5.43151	9.07895	5.37126	0.0204712	0.0396515	1.40174	UP
	hsa.miR.143.3p	-11.4414	7.75182	5.29704	0.0213617	0.0406947	1.39046	DOWN
	hsa.miR.28.3p	-2.70724	10.1752	5.29487	0.0213884	0.0406947	1.39046	DOWN
	hsa.miR.149.5p	-2.48585	10.53	5.20967	0.0224616	0.0423619	1.37303	DOWN
	hsa.let.7a.5p	-1.63399	18.1606	4.97038	0.025785	0.0482066	1.31689	DOWN
	hsa.miR.23a.5p	5.90015	8.19828	4.95025	0.0260869	0.0483507	1.3156	UP
	hsa.miR.369.5p	5.94995	8.17615	4.65294	0.0310004	0.0569666	1.24438	NO
	hsa.miR.485.5p	6.42718	6.51607	4.46891	0.034517	0.0628911	1.20141	NO
	hsa.miR.27a.3p	-3.70321	8.62995	4.43852	0.0351367	0.0634823	1.19735	NO
	hsa.miR.100.5p	1.72646	12.56	4.24903	0.0392729	0.070214	1.15358	NO
	hsa.miR.181b.5p	-2.62702	9.45231	4.23856	0.0395158	0.070214	1.15358	NO
	hsa.miR.181a.5p	-2.6816	9.58398	4.0969	0.042962	0.0757118	1.12084	NO
	hsa.miR.1180.3p	-2.01906	10.5165	4.03607	0.0445375	0.0778501	1.10874	NO
	hsa.miR.25.5p	-10.3441	6.96817	4.00167	0.0454552	0.0788134	1.1034	NO
	hsa.miR.3135b	1.85058	10.2713	3.92065	0.0476964	0.0814364	1.08918	NO
	hsa.miR.22.5p	4.06815	8.71443	3.91962	0.0477255	0.0814364	1.08918	NO
	hsa.miR.98.5p	-1.43223	13.1742	3.75476	0.0526573	0.0891442	1.04991	NO
	hsa.miR.532.3p	4.58018	7.70965	3.59236	0.0580457	0.0974986	1.011	NO
	hsa.miR.376a.3p	4.47995	7.81106	3.5055	0.0611653	0.101942	0.991646	NO
	hsa.miR.99b.5p	-1.92906	10.0357	3.38598	0.0657529	0.108745	0.96359	NO
	hsa.miR.126.3p	-1.8204	10.8279	3.17514	0.0747668	0.122709	0.911124	NO
	hsa.miR.483.5p	3.92415	7.49938	3.14901	0.0759732	0.123744	0.907475	NO
	hsa.miR.197.3p	-2.99465	8.55499	3.06054	0.0802149	0.129671	0.887158	NO
	hsa.let.7i.5p	-1.17075	17.2613	2.94631	0.0860741	0.138104	0.859794	NO
	hsa.miR.4787.5p	1.78914	9.60119	2.81788	0.0932192	0.148268	0.828952	NO
	hsa.miR.182.5p	-2.15247	9.79802	2.80812	0.0937883	0.148268	0.828952	NO
	hsa.miR.224.5p	-2.6578	8.94159	2.66789	0.102391	0.160687	0.794018	NO
	hsa.miR.4448	4.10154	7.79678	2.47575	0.115614	0.180124	0.744429	NO
	hsa.miR.1290	1.27645	12.603	2.43667	0.118528	0.182843	0.737922	NO
	hsa.miR.31.5p	-2.20247	11.605	2.42964	0.119061	0.182843	0.737922	NO
	hsa.miR.877.5p	-2.56686	8.56739	2.41659	0.120056	0.183064	0.737396	NO
	hsa.miR.4706	4.80941	7.51795	2.38189	0.122749	0.185852	0.730833	NO
	hsa.miR.4429	3.03027	7.27843	2.36643	0.12397	0.186388	0.729581	NO
	hsa.miR.3162.5p	4.99337	7.06928	2.23344	0.135053	0.201641	0.695421	NO
	hsa.miR.15b.5p	-1.96189	9.50735	2.07658	0.149575	0.220553	0.656486	NO
	hsa.let.7b.5p	-1.02182	17.0807	2.07458	0.149771	0.220553	0.656486	NO
	hsa.let.7c.5p	-1.29225	12.2717	2.02688	0.154537	0.226024	0.645846	NO
	hsa.miR.548h.5p	-8.68285	6.60989	1.95316	0.162247	0.235697	0.627647	NO
	hsa.miR.103a.3p	-1.24747	11.01	1.91885	0.165984	0.23791	0.623587	NO
	hsa.miR.103b	-1.24747	11.01	1.91885	0.165984	0.23791	0.623587	NO
	hsa.miR.6777.5p	2.88049	7.65646	1.83846	0.175132	0.24936	0.603173	NO
	hsa.miR.6758.5p	4.40422	6.79111	1.81725	0.17764	0.250466	0.601252	NO
	hsa.miR.7977	3.08529	8.08073	1.80513	0.179093	0.250466	0.601252	NO
	hsa.miR.1275	-1.65295	9.30415	1.80256	0.179403	0.250466	0.601252	NO
	hsa.miR.6873.3p	-7.92899	7.06063	1.75385	0.185393	0.257159	0.589799	NO
	hsa.miR.4516	2.51512	8.74077	1.65879	0.197766	0.271668	0.565961	NO
	hsa.miR.1268a	-1.38219	9.68966	1.65425	0.198381	0.271668	0.565961	NO
	hsa.miR.6825.5p	4.45697	3.93153	1.56567	0.210837	0.286898	0.542273	NO
	hsa.miR.744.5p	-1.11055	11.2648	1.50243	0.220298	0.297888	0.525948	NO
	hsa.miR.107	-1.55344	8.39224	1.44464	0.22939	0.308243	0.511107	NO
	hsa.miR.4634	2.86144	7.58082	1.39465	0.237622	0.317321	0.498501	NO
	hsa.miR.320c	-0.914131	12.6858	1.3633	0.242967	0.322456	0.491529	NO
	hsa.miR.221.3p	1.10845	10.5531	1.34861	0.245521	0.323847	0.48966	NO
	hsa.miR.125b.5p	-1.31298	9.25475	1.24177	0.265131	0.34758	0.458945	NO
	hsa.miR.6880.5p	2.30401	6.82393	1.15804	0.281872	0.367288	0.434993	NO
	hsa.miR.125a.5p	-1.52258	9.206	1.09516	0.295331	0.381948	0.417996	NO
	hsa.miR.671.5p	-1.56495	9.28959	1.08908	0.296676	0.381948	0.417996	NO
	hsa.miR.1268b	-1.04845	9.89548	1.07969	0.298767	0.382351	0.417538	NO
	hsa.miR.193a.5p	1.26271	10.0186	1.06809	0.301376	0.382905	0.416909	NO
	hsa.miR.1908.5p	-1.36685	9.88081	1.06199	0.302762	0.382905	0.416909	NO
	hsa.miR.29b.3p	-0.995706	10.743	1.02955	0.310265	0.390099	0.408825	NO
	hsa.miR.29a.3p	-1.096	10.3568	0.974227	0.323628	0.404535	0.393044	NO
	hsa.miR.320a.3p	-0.660291	14.3054	0.941901	0.331789	0.412339	0.384745	NO
	hsa.miR.92b.3p	-1.62043	8.68632	0.885087	0.346812	0.428532	0.368016	NO
	hsa.miR.142.3p	-6.4632	6.35534	0.697362	0.403672	0.495939	0.304571	NO
	hsa.miR.23a.3p	0.787066	9.80188	0.601789	0.437896	0.53493	0.271703	NO
	hsa.miR.1260b	-0.970355	8.57084	0.565177	0.452182	0.54926	0.260222	NO
	hsa.miR.365a.5p	1.69402	7.61547	0.547518	0.459333	0.554813	0.255853	NO
	hsa.miR.2392	1.64992	7.00079	0.52855	0.467217	0.561183	0.250896	NO
	hsa.miR.20a.5p	-1.2796	8.15762	0.50361	0.477918	0.570847	0.24348	NO
	hsa.miR.7704	1.50418	8.67874	0.492095	0.482994	0.573722	0.241298	NO
	hsa.miR.30a.5p	-1.21634	8.17854	0.451964	0.501404	0.591524	0.228027	NO
	hsa.miR.1246	0.635931	12.3409	0.447586	0.503484	0.591524	0.228027	NO
	hsa.miR.155.5p	0.522959	12.8185	0.431754	0.51113	0.597244	0.223848	NO
	hsa.miR.411.5p	1.50963	7.4893	0.418679	0.517597	0.601532	0.220741	NO
	hsa.miR.34a.5p	0.739265	9.89657	0.407235	0.523376	0.604978	0.218261	NO
	hsa.miR.4488	1.49823	7.28672	0.399814	0.527185	0.606122	0.21744	NO
	hsa.miR.17.5p	-1.06864	7.77103	0.377765	0.538802	0.616183	0.21029	NO
	hsa.miR.184	1.34347	7.86582	0.363468	0.546586	0.621778	0.206365	NO
	hsa.miR.6724.5p	0.706641	8.97559	0.345579	0.556627	0.629867	0.200751	NO
	hsa.miR.30a.3p	-0.525289	12.0604	0.328729	0.566408	0.63758	0.195465	NO
	hsa.miR.193b.5p	-0.985685	8.11311	0.321613	0.57064	0.638998	0.194501	NO
	hsa.miR.320d	-0.397233	11.9045	0.278155	0.597913	0.666069	0.176481	NO
	hsa.miR.320b	-0.37393	13.2045	0.262226	0.608595	0.674474	0.171035	NO
	hsa.miR.92b.5p	0.736157	7.75832	0.18672	0.66566	0.733933	0.134343	NO
	hsa.miR.23b.3p	0.474135	9.8598	0.169465	0.680588	0.746563	0.126934	NO
	hsa.miR.769.5p	-0.701726	7.64317	0.153376	0.69533	0.758599	0.119987	NO
	hsa.miR.589.5p	0.974115	6.96833	0.149914	0.698617	0.758599	0.119987	NO
	hsa.miR.99a.5p	0.653115	6.79221	0.13182	0.716553	0.774165	0.111167	NO
	hsa.miR.1307.3p	-0.504948	8.70753	0.117412	0.731858	0.786748	0.104165	NO
	hsa.miR.22.3p	-0.545229	8.01912	0.0857364	0.769669	0.823278	0.0844535	NO
	hsa.miR.378a.3p	-0.23894	9.00799	0.0294869	0.86366	0.919242	0.0365703	NO
	hsa.miR.21.5p	-0.11222	10.7291	0.00942422	0.922664	0.977206	0.0100139	NO
	hsa.miR.423.5p	-0.0520502	14.7289	0.00548491	0.940962	0.981308	0.00819487	NO
	hsa.miR.3184.3p	-0.0520502	14.7289	0.00548491	0.940962	0.981308	0.00819487	NO
	hsa.miR.421	0.140701	7.96022	0.00512335	0.942938	0.981308	0.00819487	NO
	hsa.miR.12136	0.110935	8.18591	0.00479502	0.944794	0.981308	0.00819487	NO
	hsa.miR.92a.3p	-0.0507781	9.22789	0.00175322	0.966601	0.997646	0.0010234	NO
	hsa.miR.24.3p	0.0532782	9.11528	0.00143284	0.969805	0.997646	0.0010234	NO
	hsa.miR.8485	-0.0469753	7.95892	0.000661318	0.979484	1	0	NO
	hsa.miR.657	0	7.1598	0	1	1	0	NO
	hsa.miR.1249.5p	0	6.97991	0	1	1	0	NO
	hsa.miR.4492	0	7.18125	0	1	1	0	NO
	hsa.miR.7110.5p	0	7.07541	0	1	1	0	NO
	hsa.miR.8052	0	6.42249	0	1	1	0	NO

## Sheet: Table S6
Table S6. Differential miRNA Expression: Met5a_10k vs VMC23_10k
		logFC	logCPM	LR	PValue	FDR	adj-P	diffexp
	hsa.miR.548e.3p	16.5814	11.3002	76.3659	2.3568e-18	5.06712e-16	15.2952	UP
	hsa.miR.8060	16.5995	11.3391	48.6518	3.05682e-12	2.47015e-10	9.60728	UP
	hsa.miR.6867.5p	14.1198	9.8887	48.1919	3.86473e-12	2.47015e-10	9.60728	UP
	hsa.miR.4713.5p	16.2527	11.1523	47.8523	4.59563e-12	2.47015e-10	9.60728	UP
	hsa.miR.153.5p	15.6122	10.2157	46.8338	7.72697e-12	3.3226e-10	9.47852	UP
	hsa.miR.6717.5p	16.0372	11.0193	46.0043	1.17994e-11	4.22811e-10	9.37385	UP
	hsa.miR.6503.5p	16.1922	11.124	45.2933	1.69626e-11	4.6771e-10	9.33002	UP
	hsa.miR.6865.5p	15.8813	10.8031	45.2431	1.74031e-11	4.6771e-10	9.33002	UP
	hsa.miR.3613.3p	14.2266	10.1178	43.9296	3.40398e-11	8.13172e-10	9.08982	UP
	hsa.miR.638	14.1143	8.8975	43.5134	4.21068e-11	9.05297e-10	9.04321	UP
	hsa.miR.4458	15.3688	10.5378	40.1366	2.36805e-10	4.62846e-09	8.33456	UP
	hsa.miR.5193	15.2436	10.9435	39.097	4.03265e-10	7.22516e-09	8.14115	UP
	hsa.miR.765	13.1282	9.48362	36.5387	1.49663e-09	2.4752e-08	7.60639	UP
	hsa.miR.4747.3p	14.8439	10.4897	33.3361	7.75302e-09	1.19064e-07	6.92422	UP
	hsa.miR.6794.5p	13.9948	8.81328	29.1913	6.55724e-08	9.39871e-07	6.02693	UP
	hsa.miR.6746.3p	9.94256	12.0305	28.9737	7.3366e-08	9.85855e-07	6.00619	UP
	hsa.miR.4757.3p	13.3933	10.7963	26.5686	2.54341e-07	3.21667e-06	5.49259	UP
	hsa.miR.6801.3p	12.5798	8.20142	26.1605	3.1418e-07	3.7527e-06	5.42566	UP
	hsa.miR.6892.3p	12.6215	8.71485	24.4363	7.68071e-07	8.69133e-06	5.06091	UP
	hsa.miR.3960	4.03968	12.9659	23.247	1.42473e-06	1.53159e-05	4.81486	UP
	hsa.miR.411.3p	13.3314	7.33112	23.0613	1.56921e-06	1.60657e-05	4.7941	UP
	hsa.miR.1224.3p	12.2459	7.83689	22.8436	1.75731e-06	1.62223e-05	4.78989	UP
	hsa.miR.3945	12.771	8.24887	22.8148	1.7839e-06	1.62223e-05	4.78989	UP
	hsa.miR.6796.3p	13.328	8.19825	22.7859	1.81086e-06	1.62223e-05	4.78989	UP
	hsa.miR.3126.3p	13.7915	9.10469	22.536	2.06242e-06	1.77368e-05	4.75112	UP
	hsa.miR.6772.3p	13.0723	7.61358	21.8585	2.93513e-06	2.42713e-05	4.61491	UP
	hsa.miR.6837.3p	13.9247	8.6271	21.1699	4.20311e-06	3.34692e-05	4.47535	UP
	hsa.miR.5089.3p	9.38434	10.3764	20.8143	5.0604e-06	3.88566e-05	4.41053	UP
	hsa.miR.6124	13.0773	8.02172	20.4827	6.01741e-06	4.46118e-05	4.35055	UP
	hsa.miR.28.3p	-15.1139	10.1752	19.7615	8.77307e-06	6.28737e-05	4.20153	DOWN
	hsa.miR.3675.3p	11.9804	7.78637	19.4982	1.00696e-05	6.98377e-05	4.15591	UP
	hsa.miR.4695.3p	10.7278	8.49021	19.3195	1.10571e-05	7.09611e-05	4.14898	UP
	hsa.miR.335.5p	-3.71903	12.9645	19.2746	1.13205e-05	7.09611e-05	4.14898	DOWN	hsa.miR.335.5p
	hsa.miR.382.5p	4.68641	10.9569	19.2477	1.14811e-05	7.09611e-05	4.14898	UP
	hsa.miR.6803.5p	12.4372	8.18496	19.2359	1.15518e-05	7.09611e-05	4.14898	UP
	hsa.miR.4700.5p	12.6954	7.60117	18.8093	1.44462e-05	8.62757e-05	4.06411	UP
	hsa.miR.7110.5p	11.8565	7.07541	18.5478	1.65695e-05	9.6282e-05	4.01646	UP
	hsa.miR.196a.5p	-6.11662	11.2975	17.0259	3.68734e-05	0.000208626	3.68063	DOWN	hsa.miR.196a.5p
	hsa.miR.23a.5p	13.7629	8.19828	16.2338	5.59868e-05	0.000308645	3.51054	UP
	hsa.miR.6795.5p	10.3322	7.72822	16.0855	6.05454e-05	0.000325431	3.48754	UP
	hsa.miR.3147	10.9492	6.80947	15.9956	6.34914e-05	0.000332942	3.47763	UP
	hsa.miR.376a.3p	12.7519	7.81106	15.9007	6.6753e-05	0.000341712	3.46634	UP
	hsa.miR.3916	9.62996	9.82343	14.7485	0.000122845	0.000614225	3.21167	UP
	hsa.miR.1207.5p	12.3584	7.65449	14.6857	0.000127005	0.000620594	3.20719	UP
	hsa.miR.657	11.6158	7.1598	14.495	0.00014053	0.000670237	3.17377	UP
	hsa.miR.365a.5p	12.8716	7.61547	14.457	0.0001434	0.000670237	3.17377	UP
	hsa.miR.7847.3p	7.66406	10.6619	14.2088	0.000163606	0.000748411	3.12586	UP
	hsa.miR.7113.5p	12.2028	7.34947	14.1663	0.000167342	0.000749554	3.1252	UP
	hsa.miR.6731.5p	6.77845	9.52556	13.8413	0.000198921	0.000872816	3.05908	UP
	hsa.miR.342.3p	6.93725	12.2554	13.7285	0.00021123	0.000908289	3.04178	UP
	hsa.miR.483.3p	12.5244	6.97856	13.6122	0.000224716	0.000947333	3.0235	UP
	hsa.miR.93.5p	-3.83025	12.7926	13.3148	0.000263325	0.00108875	2.96307	DOWN	hsa.miR.93.5p
	hsa.miR.5196.5p	13.5758	7.59281	12.4897	0.000409203	0.00165997	2.7799	UP
	hsa.miR.524.3p	11.8214	7.52146	12.1651	0.000486909	0.00193862	2.71251	UP
	hsa.miR.3195	12.5532	7.65057	12.0987	0.000504577	0.00197244	2.705	UP
	hsa.miR.3141	10.4351	6.95905	12.0502	0.000517874	0.00198827	2.70153	UP
	hsa.miR.525.3p	11.8207	7.59182	11.909	0.00055862	0.00210708	2.67632	UP
	hsa.miR.328.5p	12.6122	6.80978	11.8188	0.000586362	0.00217358	2.66282	UP
	hsa.miR.6880.5p	9.51374	6.82393	11.6511	0.000641638	0.00233817	2.63112	UP
	hsa.let.7d.5p	-2.60971	13.7905	11.6047	0.000657859	0.00235733	2.62758	DOWN	hsa.let.7d.5p
	hsa.miR.4763.3p	11.276	7.11423	11.2776	0.000784477	0.00274247	2.56186	UP
	hsa.let.7f.5p	-2.63913	16.8099	11.2626	0.000790851	0.00274247	2.56186	DOWN
	hsa.miR.10a.5p	-3.22907	11.9986	10.9944	0.000913884	0.00307221	2.51255	DOWN
	hsa.miR.7107.5p	11.8687	6.59523	10.9746	0.000923699	0.00307221	2.51255	UP
	hsa.miR.191.5p	-2.58096	13.3221	10.9644	0.000928807	0.00307221	2.51255	DOWN
	hsa.miR.2861	11.574	7.41498	10.6856	0.00107971	0.00351725	2.4538	UP
	hsa.miR.127.3p	4.67987	9.66717	10.5943	0.00113435	0.00364008	2.43889	UP
	hsa.miR.6788.3p	10.8396	6.63255	10.4759	0.00120939	0.00382381	2.4175	UP
	hsa.miR.8052	11.9822	6.42249	10.1284	0.00146002	0.00454934	2.34205	UP
	hsa.let.7f.2.3p	8.99287	7.58935	10.0796	0.00149921	0.00460471	2.3368	UP
	hsa.miR.365b.5p	11.2578	7.01389	9.35988	0.00221787	0.00671609	2.17288	UP
	hsa.miR.7.5p	-4.14776	11.8286	9.30835	0.00228112	0.00671837	2.17274	DOWN
	hsa.miR.3529.3p	-4.14776	11.8286	9.30835	0.00228112	0.00671837	2.17274	DOWN
	hsa.miR.1249.5p	8.86364	6.97991	9.23868	0.00236956	0.00688452	2.16213	UP
	hsa.miR.6873.3p	8.30405	7.06063	9.15738	0.00247717	0.00710121	2.14867	UP
	hsa.let.7g.5p	-2.41179	15.5611	8.80527	0.00300361	0.00849706	2.07073	DOWN
	hsa.miR.26a.5p	-2.42192	14.1909	8.76845	0.00306486	0.00855772	2.06764	DOWN
	hsa.miR.149.5p	-3.45995	10.53	8.54297	0.00346859	0.00956086	2.0195	DOWN
	hsa.let.7e.5p	-2.18659	15.0721	8.34994	0.00385699	0.0104969	1.97894	DOWN
	hsa.miR.30e.3p	-3.63468	9.73244	8.1706	0.00425749	0.011442	1.9415	DOWN
	hsa.miR.432.5p	3.40186	10.1497	8.07788	0.00448089	0.0118937	1.92468	UP
	hsa.miR.151a.5p	-2.59434	12.7249	8.03666	0.00458401	0.012019	1.92013	DOWN
	hsa.miR.10400.5p	4.71422	9.32399	7.8748	0.00501284	0.0128339	1.89164	UP
	hsa.miR.185.5p	-2.67839	11.3242	7.87177	0.00502124	0.0128339	1.89164	DOWN
	hsa.miR.16.5p	-2.24154	14.8836	7.85292	0.00507386	0.0128339	1.89164	DOWN
	hsa.miR.6089	6.91805	9.07895	7.58477	0.00588636	0.0147159	1.83221	UP
	hsa.miR.5584.5p	6.31853	8.47221	7.52769	0.00607577	0.0150148	1.82348	UP
	hsa.miR.1183	8.91841	6.65206	7.40472	0.00650531	0.0158937	1.79878	UP
	hsa.miR.1260b	-12.0409	8.57084	7.05863	0.00788844	0.0190563	1.71996	DOWN
	hsa.miR.6760.5p	8.84323	7.15907	6.98798	0.00820591	0.019603	1.70768	UP
	hsa.miR.6869.5p	6.50713	7.9484	6.89603	0.00863872	0.0204102	1.69015	UP
	hsa.miR.877.5p	-12.6283	8.56739	6.86495	0.00879026	0.0205424	1.68735	DOWN
	hsa.miR.6825.5p	11.1272	3.93153	6.81648	0.00903202	0.0208805	1.68026	UP
	hsa.miR.1246	2.60485	12.3409	6.62302	0.0100669	0.0230253	1.63779	UP
	hsa.miR.1180.3p	-2.57359	10.5165	6.09966	0.0135208	0.0305997	1.51428	DOWN
	hsa.miR.22.5p	5.29987	8.71443	5.91843	0.0149833	0.0335564	1.47422	UP
	hsa.miR.6774.3p	5.15971	8.21895	5.68831	0.0170783	0.037854	1.42189	UP
	hsa.miR.1290	2.00419	12.603	5.664	0.0173166	0.037897	1.42139	UP
	hsa.let.7a.5p	-1.74906	18.1606	5.65051	0.0174503	0.037897	1.42139	DOWN
	hsa.miR.30c.5p	-12.0732	7.65537	5.47233	0.0193199	0.0415377	1.38156	DOWN
	hsa.miR.1275	-4.20203	9.30415	5.4544	0.0195191	0.0415505	1.38142	DOWN
	hsa.miR.6891.3p	6.11462	8.24927	5.29205	0.021423	0.0451563	1.34528	UP
	hsa.miR.3202	7.59914	7.38827	5.25086	0.0219359	0.0457886	1.33924	UP
	hsa.miR.369.5p	6.46278	8.17615	5.23037	0.0221959	0.0458857	1.33832	UP
	hsa.miR.6734.3p	6.24371	6.88795	5.1224	0.0236189	0.0483626	1.31549	UP
	hsa.miR.138.5p	4.15508	9.20527	4.94745	0.0261292	0.052998	1.27574	NO
	hsa.miR.6782.5p	6.41138	7.9843	4.83088	0.0279544	0.05617	1.2505	NO
	hsa.miR.4723.3p	6.30606	7.82577	4.61471	0.0316988	0.0631042	1.19994	NO
	hsa.miR.6730.5p	5.36168	8.53644	4.58291	0.0322924	0.063696	1.19589	NO
	hsa.miR.574.5p	-1.94534	12.4373	4.48157	0.0342622	0.066967	1.17414	NO
	hsa.let.7i.5p	-1.41729	17.2613	4.2615	0.0389855	0.0749685	1.12512	NO
	hsa.miR.1249.3p	5.20021	7.92471	4.25855	0.0390533	0.0749685	1.12512	NO
	hsa.miR.12116	6.63202	7.04595	4.21052	0.040174	0.0764373	1.11669	NO
	hsa.miR.421	-11.8852	7.96022	4.14795	0.041685	0.0786164	1.10449	NO
	hsa.miR.4429	4.23338	7.27843	4.03724	0.0445065	0.0832078	1.07984	NO
	hsa.miR.181b.5p	-2.612	9.45231	3.57239	0.0587478	0.108886	0.963028	NO
	hsa.miR.3135b	1.78605	10.2713	3.51154	0.0609429	0.111897	0.951183	NO
	hsa.miR.130b.3p	-2.92914	9.25935	3.48752	0.0618333	0.111897	0.951183	NO
	hsa.miR.532.3p	4.52514	7.70965	3.48484	0.0619335	0.111897	0.951183	NO
	hsa.miR.376c.3p	4.64916	7.94904	3.44852	0.0633085	0.113428	0.945281	NO
	hsa.miR.411.5p	4.92553	7.4893	3.3999	0.0652005	0.115852	0.936096	NO
	hsa.miR.7977	4.52321	8.08073	3.3777	0.0660841	0.11646	0.933824	NO
	hsa.miR.197.3p	-3.82196	8.55499	3.33545	0.0678018	0.118275	0.927107	NO
	hsa.miR.320a.3p	-1.26102	14.3054	3.3217	0.0683711	0.118275	0.927107	NO
	hsa.miR.8485	3.61601	7.95892	3.31227	0.0687645	0.118275	0.927107	NO
	hsa.miR.4706	5.95488	7.51795	3.25498	0.0712068	0.121504	0.915411	NO
	hsa.miR.3162.5p	6.22446	7.06928	3.09883	0.0783484	0.132637	0.877335	NO
	hsa.miR.483.5p	3.85039	7.49938	2.98803	0.0838824	0.140896	0.851101	NO
	hsa.miR.744.5p	-1.61694	11.2648	2.8525	0.091232	0.152053	0.818004	NO
	hsa.miR.100.5p	1.38341	12.56	2.76131	0.096569	0.159579	0.797024	NO
	hsa.miR.99b.5p	-1.76234	10.0357	2.75037	0.097232	0.159579	0.797024	NO
	hsa.miR.6743.5p	5.65984	5.85753	2.69521	0.10065	0.163937	0.785322	NO
	hsa.miR.6786.5p	5.20409	7.11826	2.67985	0.101625	0.164281	0.784412	NO
	hsa.let.7b.5p	-1.15708	17.0807	2.64037	0.104179	0.167153	0.776885	NO
	hsa.miR.6826.3p	4.79465	6.7089	2.52223	0.112252	0.178771	0.747702	NO
	hsa.miR.29b.3p	-1.60702	10.743	2.4365	0.11854	0.187138	0.727838	NO
	hsa.miR.98.5p	-1.15598	13.1742	2.42719	0.119246	0.187138	0.727838	NO
	hsa.miR.31.5p	-2.20064	11.605	2.40196	0.121184	0.188801	0.723996	NO
	hsa.miR.6724.5p	1.97197	8.97559	2.37253	0.123487	0.191005	0.718955	NO
	hsa.miR.181a.5p	-1.99068	9.58398	2.17772	0.140022	0.215033	0.667495	NO
	hsa.miR.4448	3.60836	7.79678	1.92618	0.165177	0.251865	0.598832	NO
	hsa.miR.23a.3p	-1.48601	9.80188	1.91283	0.16665	0.252322	0.598045	NO
	hsa.miR.92a.3p	-1.82435	9.22789	1.83271	0.175807	0.264326	0.577861	NO
	hsa.miR.320c	-0.990051	12.6858	1.55554	0.212319	0.317004	0.498935	NO
	hsa.miR.182.5p	-1.60647	9.79802	1.54324	0.214136	0.317512	0.498239	NO
	hsa.miR.4488	3.07409	7.28672	1.50772	0.219487	0.323217	0.490506	NO
	hsa.miR.6126	1.78939	10.0277	1.48671	0.222727	0.325758	0.487105	NO
	hsa.miR.4492	3.24188	7.18125	1.44837	0.22879	0.326623	0.485954	NO
	hsa.miR.125a.5p	-1.92111	9.206	1.44616	0.229144	0.326623	0.485954	NO
	hsa.miR.103a.3p	-1.09922	11.01	1.44461	0.229395	0.326623	0.485954	NO
	hsa.miR.103b	-1.09922	11.01	1.44461	0.229395	0.326623	0.485954	NO
	hsa.miR.2392	2.97715	7.00079	1.43422	0.231078	0.326853	0.485647	NO
	hsa.miR.1908.3p	1.89086	8.71574	1.39491	0.237577	0.333758	0.476569	NO
	hsa.miR.1307.3p	-1.9241	8.70753	1.38611	0.239064	0.333758	0.476569	NO
	hsa.miR.107	-1.68477	8.39224	1.33348	0.248187	0.342125	0.465815	NO
	hsa.miR.518b	3.42315	6.43934	1.33318	0.24824	0.342125	0.465815	NO
	hsa.miR.92b.3p	-2.10379	8.68632	1.29783	0.254609	0.348669	0.457587	NO
	hsa.miR.130a.3p	-1.17754	10.0659	1.28712	0.25658	0.349143	0.456996	NO
	hsa.miR.4771	3.00065	8.06879	1.26196	0.26128	0.353303	0.451852	NO
	hsa.miR.224.5p	-1.73487	8.94159	1.20129	0.273064	0.36693	0.435417	NO
	hsa.miR.1908.5p	-1.43318	9.88081	1.11135	0.29179	0.389657	0.409318	NO
	hsa.miR.671.5p	-1.59476	9.28959	1.08457	0.297678	0.395066	0.40333	NO
	hsa.miR.7704	2.26018	8.67874	1.05168	0.30512	0.401005	0.39685	NO
	hsa.miR.99a.5p	-8.00744	6.79221	1.04837	0.305883	0.401005	0.39685	NO
	hsa.miR.122b.3p	1.34714	11.3817	1.02382	0.311615	0.406044	0.391427	NO
	hsa.miR.4787.5p	1.12618	9.60119	0.934972	0.333574	0.432039	0.364477	NO
	hsa.miR.6879.5p	3.04443	6.60605	0.914571	0.338905	0.436314	0.360201	NO
	hsa.miR.423.5p	-0.650164	14.7289	0.842194	0.35877	0.456424	0.340632	NO
	hsa.miR.3184.3p	-0.650164	14.7289	0.842194	0.35877	0.456424	0.340632	NO
	hsa.miR.4634	2.23842	7.58082	0.766585	0.381275	0.482201	0.316772	NO
	hsa.miR.25.5p	1.87321	6.96817	0.727771	0.393607	0.494885	0.305495	NO
	hsa.miR.122.5p	0.935739	11.456	0.671577	0.412502	0.51558	0.287704	NO
	hsa.miR.493.3p	2.34908	6.53843	0.664825	0.414862	0.51558	0.287704	NO
	hsa.miR.27a.3p	-1.20075	8.62995	0.609542	0.43496	0.537451	0.269661	NO
	hsa.miR.20a.5p	-1.24595	8.15762	0.445299	0.504576	0.61822	0.208857	NO
	hsa.miR.34a.5p	0.78491	9.89657	0.442168	0.506078	0.61822	0.208857	NO
	hsa.miR.6777.5p	1.41293	7.65646	0.410373	0.52178	0.633801	0.198047	NO
	hsa.miR.142.3p	1.93209	6.35534	0.368485	0.543831	0.656197	0.182966	NO
	hsa.miR.6870.3p	-6.49984	6.69844	0.355702	0.550903	0.656197	0.182966	NO
	hsa.miR.320d	-0.457953	11.9045	0.355206	0.551181	0.656197	0.182966	NO
	hsa.miR.4651	1.91035	6.62554	0.348544	0.554939	0.656197	0.182966	NO
	hsa.miR.15b.5p	-0.788784	9.50735	0.347594	0.555478	0.656197	0.182966	NO
	hsa.miR.193b.5p	-1.03392	8.11311	0.323587	0.56946	0.669037	0.17455	NO
	hsa.miR.1268b	0.552285	9.89548	0.292414	0.588677	0.684607	0.164559	NO
	hsa.miR.23b.3p	-0.638706	9.8598	0.290754	0.589738	0.684607	0.164559	NO
	hsa.miR.320b	-0.39501	13.2045	0.286821	0.592265	0.684607	0.164559	NO
	hsa.miR.4516	0.946592	8.74077	0.240349	0.623954	0.716822	0.144589	NO
	hsa.miR.4271	1.50278	6.44379	0.236422	0.626802	0.716822	0.144589	NO
	hsa.let.7c.5p	-0.368361	12.2717	0.162748	0.686639	0.781097	0.107295	NO
	hsa.miR.12136	0.575347	8.18591	0.114341	0.735255	0.831999	0.0798773	NO
	hsa.miR.30a.5p	-0.625544	8.17854	0.102386	0.748985	0.843099	0.0741216	NO
	hsa.miR.6758.5p	0.88218	6.79111	0.0904868	0.763559	0.855027	0.06802	NO
	hsa.miR.184	0.661195	7.86582	0.0866583	0.768469	0.856067	0.0674924	NO
	hsa.miR.29a.3p	-0.306719	10.3568	0.0770159	0.781383	0.865966	0.0624994	NO
	hsa.miR.154.5p	0.729402	6.76127	0.0698103	0.791613	0.872804	0.0590831	NO
	hsa.miR.378a.3p	-0.34059	9.00799	0.0561175	0.812741	0.891527	0.0498654	NO
	hsa.miR.30a.3p	-0.200149	12.0604	0.047375	0.827696	0.903323	0.0441571	NO
	hsa.miR.126.3p	-0.210805	10.8279	0.0443878	0.833134	0.904665	0.043512	NO
	hsa.miR.17.5p	-0.371982	7.77103	0.0410967	0.839351	0.906837	0.0424708	NO
	hsa.miR.24.3p	-0.268122	9.11528	0.0348541	0.851902	0.915794	0.0382021	NO
	hsa.miR.125b.5p	0.213607	9.25475	0.0328145	0.856252	0.915891	0.0381562	NO
	hsa.miR.769.5p	0.271704	7.64317	0.021391	0.883719	0.940592	0.0265988	NO
	hsa.miR.1268a	0.150387	9.68966	0.0192917	0.889534	0.942117	0.0258952	NO
	hsa.miR.143.3p	-0.274041	7.75182	0.0159515	0.899495	0.947997	0.0231929	NO
	hsa.miR.193a.5p	0.109004	10.0186	0.0077044	0.930056	0.975424	0.0108064	NO
	hsa.miR.92b.5p	-0.124832	7.75832	0.00497312	0.943779	0.985013	0.00655822	NO
	hsa.miR.589.5p	0.127686	6.96833	0.00239561	0.960963	0.995241	0.00207162	NO
	hsa.miR.22.3p	0.085678	8.01912	0.00206159	0.963785	0.995241	0.00207162	NO
	hsa.miR.155.5p	0.0308523	12.8185	0.00147692	0.969344	0.995241	0.00207162	NO
	hsa.miR.221.3p	-0.0335423	10.5531	0.00122356	0.972096	0.995241	0.00207162	NO
	hsa.miR.21.5p	0.023446	10.7291	0.000406696	0.98391	1	0	NO
	hsa.miR.485.5p	0	6.51607	0	1	1	0	NO
	hsa.miR.519d.5p	0	6.42369	0	1	1	0	NO
	hsa.miR.548h.5p	0	6.60989	0	1	1	0	NO
	hsa.miR.6727.5p	0	6.46283	0	1	1	0	NO

## Sheet: Table S7
Table S7 Differential miRNA Expression: Met5a_100k vs VMC23_100k
		logFC	logCPM	LR	PValue	FDR	adj-P	diffexp
	hsa.miR.548e.3p	12.9549	11.3002	52.722	3.84271e-13	8.26182e-11	10.0829	UP
	hsa.miR.6746.3p	16.2155	12.0305	48.7548	2.90043e-12	3.11796e-10	9.50613	UP
	hsa.miR.6867.5p	13.9663	9.8887	45.6275	1.43017e-11	1.02496e-09	8.9893	UP
	hsa.miR.3613.3p	14.4051	10.1178	42.9462	5.6265e-11	3.02424e-09	8.51938	UP
	hsa.miR.638	13.7708	8.8975	40.4465	2.02076e-10	8.68928e-09	8.06102	UP
	hsa.miR.6865.5p	14.7832	10.8031	39.9172	2.64953e-10	9.49416e-09	8.02254	UP
	hsa.miR.6503.5p	14.6767	11.124	38.7193	4.89342e-10	1.50298e-08	7.82305	UP
	hsa.miR.5193	15.2929	10.9435	37.7582	8.00777e-10	2.15209e-08	7.66714	UP
	hsa.miR.4713.5p	13.7134	11.1523	37.3314	9.96657e-10	2.3809e-08	7.62326	UP
	hsa.miR.153.5p	13.0502	10.2157	35.8807	2.09773e-09	4.51013e-08	7.34581	UP
	hsa.miR.765	13.349	9.48362	35.664	2.3446e-09	4.58263e-08	7.33889	UP
	hsa.miR.6731.5p	14.6103	9.52556	35.0782	3.16732e-09	5.67478e-08	7.24605	UP
	hsa.miR.5089.3p	13.9218	10.3764	32.1618	1.41854e-08	2.34605e-07	6.62966	UP
	hsa.miR.4458	12.4535	10.5378	29.4784	5.6544e-08	8.68354e-07	6.0613	UP
	hsa.miR.8060	11.1083	11.3391	27.7723	1.36464e-07	1.95598e-06	5.70863	UP
	hsa.miR.4757.3p	13.771	10.7963	26.4881	2.65171e-07	3.56323e-06	5.44816	UP
	hsa.miR.6801.3p	12.8151	8.20142	25.7873	3.81186e-07	4.82088e-06	5.31687	UP
	hsa.miR.1224.3p	12.296	7.83689	21.9216	2.84026e-06	3.39253e-05	4.46948	UP
	hsa.miR.6794.5p	11.4574	8.81328	21.7257	3.14555e-06	3.55943e-05	4.44862	UP
	hsa.miR.3945	12.1945	8.24887	20.6265	5.58185e-06	6.00048e-05	4.22181	UP
	hsa.miR.3960	3.901	12.9659	20.4297	6.18627e-06	6.05498e-05	4.21789	UP
	hsa.miR.3916	12.5586	9.82343	20.4267	6.19579e-06	6.05498e-05	4.21789	UP
	hsa.miR.3675.3p	12.7476	7.78637	20.1714	7.08025e-06	6.61849e-05	4.17924	UP
	hsa.miR.3126.3p	12.3268	9.10469	18.9355	1.35212e-05	0.000121127	3.91676	UP
	hsa.miR.99b.5p	-14.0375	10.0357	17.7781	2.48227e-05	0.000213475	3.67065	DOWN
	hsa.miR.483.5p	13.2481	7.49938	17.6064	2.71674e-05	0.000224654	3.64849	UP
	hsa.miR.30e.3p	-14.0642	9.73244	17.1721	3.41407e-05	0.000262476	3.58091	DOWN
	hsa.miR.6717.5p	7.3526	11.0193	17.1698	3.4183e-05	0.000262476	3.58091	UP
	hsa.miR.3147	11.9575	6.80947	17.0065	3.72529e-05	0.000276186	3.5588	UP
	hsa.miR.6837.3p	11.8896	8.6271	16.8576	4.02916e-05	0.000288757	3.53947	UP
	hsa.miR.1246	4.60333	12.3409	16.521	4.81138e-05	0.000333692	3.47665	UP
	hsa.miR.6796.3p	10.5211	8.19825	16.2431	5.57107e-05	0.000374306	3.42677	UP
	hsa.miR.10400.5p	7.82313	9.32399	16.1212	5.9416e-05	0.000387104	3.41217	UP
	hsa.miR.6795.5p	10.4668	7.72822	15.6807	7.49849e-05	0.000473377	3.32479	UP
	hsa.miR.1290	3.68695	12.603	15.6291	7.70614e-05	0.000473377	3.32479	UP
	hsa.miR.657	12.7033	7.1598	15.4108	8.64935e-05	0.000506225	3.29566	UP
	hsa.miR.6803.5p	10.7859	8.18496	15.3972	8.71178e-05	0.000506225	3.29566	UP
	hsa.miR.4700.5p	10.7962	7.60117	14.7528	0.000122563	0.000693448	3.15899	UP
	hsa.miR.4634	13.2328	7.58082	14.0095	0.00018189	0.00100273	2.99882	UP
	hsa.miR.122.5p	4.91574	11.456	13.9254	0.000190213	0.0010224	2.99038	UP
	hsa.miR.376a.3p	11.7096	7.81106	13.7857	0.000204886	0.0010744	2.96883	UP
	hsa.let.7f.2.3p	11.7666	7.58935	13.7062	0.000213744	0.00109417	2.96092	UP
	hsa.miR.411.3p	9.20813	7.33112	13.4016	0.000251409	0.00125704	2.90065	UP
	hsa.miR.1249.5p	11.3864	6.97991	13.3227	0.000262205	0.00128123	2.89237	UP
	hsa.miR.519d.5p	12.3645	6.42369	13.1721	0.000284145	0.00135758	2.86723	UP
	hsa.miR.4448	12.9344	7.79678	13.0478	0.000303648	0.00141922	2.84795	UP
	hsa.miR.23a.5p	11.71	8.19828	12.9874	0.000313601	0.00143456	2.84328	UP
	hsa.miR.7847.3p	7.3093	10.6619	12.837	0.000339833	0.00149154	2.82637	UP
	hsa.miR.1908.5p	-14.3369	9.88081	12.8364	0.000339932	0.00149154	2.82637	DOWN	hsa.miR.1908.5p
	hsa.miR.5584.5p	9.57514	8.47221	12.411	0.00042681	0.00183528	2.7363	UP
	hsa.miR.524.3p	12.2936	7.52146	12.186	0.000481488	0.0020298	2.69255	UP
	hsa.miR.3141	10.7987	6.95905	12.1099	0.000501553	0.00207373	2.68325	UP
	hsa.miR.525.3p	12.2935	7.59182	11.9285	0.000552815	0.00224255	2.64926	UP
	hsa.miR.548h.5p	13.0386	6.60989	11.8443	0.000578377	0.0023028	2.63774	UP
	hsa.miR.4723.3p	10.8237	7.82577	11.5566	0.000675077	0.00263894	2.57857	UP
	hsa.miR.4763.3p	11.8918	7.11423	11.474	0.000705759	0.00270961	2.56709	UP
	hsa.miR.1275	-13.0703	9.30415	11.3518	0.000753764	0.00284315	2.5462	DOWN	hsa.miR.1275
	hsa.miR.6727.5p	11.8996	6.46283	11.2771	0.0007847	0.0029088	2.53629	UP
	hsa.miR.342.3p	6.0875	12.2554	10.8801	0.000972012	0.00354208	2.45074	UP
	hsa.miR.3202	11.1237	7.38827	10.7592	0.00103764	0.00371821	2.42967	UP
	hsa.miR.8052	12.8971	6.42249	10.5199	0.00118096	0.00413798	2.38321	UP
	hsa.miR.4492	11.9799	7.18125	10.5007	0.00119328	0.00413798	2.38321	UP
	hsa.miR.483.3p	10.3237	6.97856	10.4535	0.00122415	0.00417765	2.37907	UP
	hsa.miR.130b.3p	-13.6244	9.25935	10.2703	0.00135187	0.00451682	2.34517	DOWN	hsa.miR.130b.3p
	hsa.miR.122b.3p	4.92443	11.3817	10.2364	0.00137693	0.00451682	2.34517	UP
	hsa.miR.2861	10.6066	7.41498	10.2236	0.00138656	0.00451682	2.34517	UP
	hsa.miR.154.5p	10.1172	6.76127	10.1706	0.00142694	0.00457899	2.33923	UP
	hsa.miR.125b.5p	-12.303	9.25475	9.93752	0.00161944	0.00512028	2.29071	DOWN
	hsa.miR.4695.3p	6.47694	8.49021	9.8374	0.00170999	0.0052168	2.2826	UP
	hsa.miR.3195	10.8334	7.65057	9.83665	0.00171068	0.0052168	2.2826	UP
	hsa.miR.155.5p	2.80672	12.8185	9.82372	0.00172276	0.0052168	2.2826	UP
	hsa.miR.7113.5p	9.37134	7.34947	9.76036	0.00178315	0.0052871	2.27678	UP
	hsa.miR.22.5p	7.97038	8.71443	9.74802	0.00179516	0.0052871	2.27678	UP
	hsa.miR.4271	12.1276	6.44379	9.48979	0.00206618	0.00600309	2.22163	UP
	hsa.miR.518b	12.091	6.43934	9.37662	0.0021977	0.00630007	2.20065	UP
	hsa.miR.574.5p	-3.51209	12.4373	9.20676	0.00241123	0.00682125	2.16614	DOWN
	hsa.miR.1183	11.0944	6.65206	9.16433	0.00246777	0.00689054	2.16175	UP
	hsa.miR.125a.5p	-12.9332	9.206	8.663	0.00324736	0.00890913	2.05016	DOWN
	hsa.miR.6760.5p	10.6083	7.15907	8.64834	0.00327359	0.00890913	2.05016	UP
	hsa.miR.107	-11.8992	8.39224	8.20178	0.00418494	0.011247	1.94896	DOWN
	hsa.miR.185.5p	-3.18525	11.3242	8.06795	0.0045055	0.011959	1.9223	DOWN
	hsa.miR.191.5p	-2.5657	13.3221	7.99553	0.0046893	0.0122737	1.91102	DOWN
	hsa.miR.99a.5p	5.59482	6.79221	7.97673	0.00473823	0.0122737	1.91102	UP
	hsa.miR.142.3p	11.8932	6.35534	7.90212	0.0049377	0.0126382	1.89832	UP
	hsa.miR.6743.5p	10.9734	5.85753	7.71549	0.0054749	0.0138102	1.8598	UP
	hsa.miR.6873.3p	7.4447	7.06063	7.69934	0.0055241	0.0138102	1.8598	UP
	hsa.miR.4787.5p	3.26862	9.60119	7.66805	0.0056207	0.0138902	1.85729	UP
	hsa.miR.196a.5p	-4.1361	11.2975	7.56393	0.00595482	0.0145487	1.83718	DOWN
	hsa.let.7e.5p	-2.42464	15.0721	7.42073	0.00644765	0.0155758	1.80755	DOWN
	hsa.let.7c.5p	2.67848	12.2717	7.19439	0.0073132	0.0174704	1.7577	UP
	hsa.miR.1207.5p	7.75783	7.65449	7.01304	0.00809183	0.0191181	1.71856	UP
	hsa.let.7d.5p	-2.29577	13.7905	6.91516	0.00854682	0.0199735	1.69954	DOWN
	hsa.miR.30c.5p	-11.9011	7.65537	5.73675	0.0166135	0.0384077	1.41558	DOWN
	hsa.miR.8485	5.21781	7.95892	5.63819	0.0175733	0.0401943	1.39584	UP
	hsa.miR.432.5p	2.86685	10.1497	5.54775	0.0185044	0.0418785	1.37801	UP
	hsa.miR.7704	5.89273	8.67874	5.20248	0.0225547	0.0505131	1.2966	NO
	hsa.let.7f.5p	-2.02941	16.8099	5.1563	0.0231622	0.0513389	1.28955	NO
	hsa.miR.6892.3p	5.8947	8.71485	4.87717	0.0272141	0.0597045	1.22399	NO
	hsa.miR.25.5p	-12.4613	6.96817	4.71701	0.0298656	0.0648596	1.18803	NO
	hsa.miR.4747.3p	3.74819	10.4897	4.58825	0.0321919	0.0692126	1.15981	NO
	hsa.miR.22.3p	-11.6115	8.01912	4.52876	0.0333298	0.0703394	1.1528	NO
	hsa.miR.149.5p	-2.76589	10.53	4.52668	0.0333703	0.0703394	1.1528	NO
	hsa.let.7g.5p	-1.95322	15.5611	4.42785	0.0353569	0.0738033	1.13192	NO
	hsa.miR.93.5p	-2.3849	12.7926	4.39213	0.0361052	0.0746406	1.12702	NO
	hsa.miR.16.5p	-1.88204	14.8836	4.22682	0.03979	0.0814747	1.08898	NO
	hsa.miR.182.5p	-3.35447	9.79802	4.17827	0.0409454	0.0830496	1.08066	NO
	hsa.miR.184	-11.845	7.86582	3.82523	0.0504863	0.101444	0.993772	NO
	hsa.miR.411.5p	5.47259	7.4893	3.79376	0.0514439	0.102411	0.989652	NO
	hsa.miR.1908.3p	3.13522	8.71574	3.74946	0.0528245	0.104195	0.982153	NO
	hsa.miR.98.5p	-1.66592	13.1742	3.71436	0.0539463	0.10544	0.976993	NO
	hsa.let.7b.5p	-1.58518	17.0807	3.63722	0.0565012	0.109383	0.96105	NO
	hsa.let.7i.5p	-1.51123	17.2613	3.62315	0.056981	0.109383	0.96105	NO
	hsa.miR.320a.3p	-1.49983	14.3054	3.52249	0.0605415	0.11519	0.938587	NO
	hsa.miR.6089	4.32274	9.07895	3.50669	0.0611213	0.115273	0.938274	NO
	hsa.miR.6724.5p	2.42617	8.97559	3.30836	0.0689283	0.128866	0.889862	NO
	hsa.let.7a.5p	-1.47109	18.1606	3.05708	0.080386	0.147601	0.830911	NO
	hsa.miR.127.3p	2.41894	9.66717	3.04581	0.0809457	0.147601	0.830911	NO
	hsa.miR.12136	-9.66213	8.18591	3.04454	0.0810089	0.147601	0.830911	NO
	hsa.miR.493.3p	4.91062	6.53843	2.50822	0.113254	0.204618	0.689055	NO
	hsa.miR.4516	3.30013	8.74077	2.45648	0.11704	0.209698	0.678407	NO
	hsa.miR.6869.5p	3.46122	7.9484	2.3444	0.125734	0.223085	0.651529	NO
	hsa.miR.138.5p	-9.04035	9.20527	2.33386	0.126588	0.223085	0.651529	NO
	hsa.miR.7977	3.73874	8.08073	2.30479	0.128975	0.225445	0.64696	NO
	hsa.miR.28.3p	-2.00106	10.1752	2.25512	0.133173	0.230282	0.637741	NO
	hsa.miR.29b.3p	-1.75321	10.743	2.24687	0.133885	0.230282	0.637741	NO
	hsa.miR.6782.5p	-9.93758	7.9843	2.23226	0.135156	0.230623	0.637098	NO
	hsa.miR.100.5p	1.31289	12.56	2.12529	0.144885	0.244285	0.612103	NO
	hsa.miR.6880.5p	3.39831	6.82393	2.11949	0.145435	0.244285	0.612103	NO
	hsa.miR.26a.5p	-1.30572	14.1909	2.08505	0.148747	0.247912	0.605703	NO
	hsa.miR.1249.3p	3.42546	7.92471	1.99192	0.15814	0.261539	0.582464	NO
	hsa.miR.6879.5p	4.72298	6.60605	1.9766	0.159749	0.262183	0.581395	NO
	hsa.miR.130a.3p	-1.68808	10.0659	1.96317	0.161175	0.262278	0.581238	NO
	hsa.miR.27a.3p	-2.69734	8.62995	1.94918	0.162675	0.262278	0.581238	NO
	hsa.miR.103a.3p	-1.45868	11.01	1.93066	0.164686	0.262278	0.581238	NO
	hsa.miR.103b	-1.45868	11.01	1.93066	0.164686	0.262278	0.581238	NO
	hsa.miR.20a.5p	2.60319	8.15762	1.8084	0.1787	0.279344	0.553861	NO
	hsa.miR.181a.5p	-2.05354	9.58398	1.80532	0.17907	0.279344	0.553861	NO
	hsa.miR.151a.5p	-1.34374	12.7249	1.80342	0.1793	0.279344	0.553861	NO
	hsa.miR.31.5p	-2.13343	11.605	1.67676	0.195356	0.297612	0.52635	NO
	hsa.miR.320c	-1.17036	12.6858	1.67594	0.195465	0.297612	0.52635	NO
	hsa.miR.7.5p	-1.79551	11.8286	1.66774	0.196562	0.297612	0.52635	NO
	hsa.miR.3529.3p	-1.79551	11.8286	1.66774	0.196562	0.297612	0.52635	NO
	hsa.miR.6126	1.98166	10.0277	1.62867	0.201887	0.303537	0.517789	NO
	hsa.miR.1268b	1.36362	9.89548	1.60398	0.20534	0.306584	0.513451	NO
	hsa.miR.4771	3.23471	8.06879	1.4075	0.235472	0.349148	0.45699	NO
	hsa.miR.10a.5p	-1.19335	11.9986	1.38346	0.239513	0.352708	0.452585	NO
	hsa.miR.6758.5p	-9.0351	6.79111	1.34521	0.246118	0.358611	0.445376	NO
	hsa.miR.92b.3p	-2.42617	8.68632	1.341	0.246858	0.358611	0.445376	NO
	hsa.miR.193a.5p	-1.66618	10.0186	1.27652	0.258547	0.373071	0.428209	NO
	hsa.miR.1268a	1.21818	9.68966	1.14917	0.283724	0.406671	0.390757	NO
	hsa.miR.423.5p	-0.82496	14.7289	1.04744	0.306097	0.432966	0.363546	NO
	hsa.miR.3184.3p	-0.82496	14.7289	1.04744	0.306097	0.432966	0.363546	NO
	hsa.miR.15b.5p	-1.54392	9.50735	0.992079	0.319235	0.448598	0.348143	NO
	hsa.miR.6777.5p	-7.33253	7.65646	0.970098	0.324656	0.453253	0.343659	NO
	hsa.miR.335.5p	-0.801675	12.9645	0.890586	0.345319	0.476121	0.322283	NO
	hsa.miR.589.5p	2.63251	6.96833	0.890048	0.345464	0.476121	0.322283	NO
	hsa.miR.4488	2.29435	7.28672	0.819309	0.365382	0.500364	0.300714	NO
	hsa.miR.369.5p	2.08203	8.17615	0.695298	0.404368	0.550248	0.259442	NO
	hsa.miR.30a.5p	1.61731	8.17854	0.679297	0.409829	0.554171	0.256356	NO
	hsa.miR.3135b	0.822869	10.2713	0.661715	0.415955	0.55894	0.252635	NO
	hsa.miR.671.5p	-1.37741	9.28959	0.651431	0.419602	0.560337	0.25155	NO
	hsa.miR.197.3p	-1.37504	8.55499	0.593161	0.441199	0.585542	0.232442	NO
	hsa.miR.92a.3p	1.01402	9.22789	0.581696	0.445648	0.587818	0.230757	NO
	hsa.miR.6730.5p	1.7458	8.53644	0.564058	0.45263	0.593387	0.226662	NO
	hsa.miR.17.5p	1.30321	7.77103	0.491294	0.483351	0.62982	0.200783	NO
	hsa.miR.320d	-0.594634	11.9045	0.480652	0.488127	0.632213	0.199137	NO
	hsa.miR.21.5p	-0.917933	10.7291	0.467266	0.494248	0.636307	0.196333	NO
	hsa.miR.320b	-0.50737	13.2045	0.375892	0.53981	0.685942	0.163713	NO
	hsa.miR.23b.3p	-0.809608	9.8598	0.37377	0.540956	0.685942	0.163713	NO
	hsa.miR.3162.5p	-5.80558	7.06928	0.368143	0.544018	0.685942	0.163713	NO
	hsa.miR.6891.3p	-1.70966	8.24927	0.365326	0.545563	0.685942	0.163713	NO
	hsa.miR.29a.3p	-0.740427	10.3568	0.345107	0.556896	0.693657	0.158855	NO
	hsa.miR.382.5p	-0.681628	10.9569	0.342914	0.558152	0.693657	0.158855	NO
	hsa.miR.877.5p	-0.987826	8.56739	0.304779	0.580902	0.717781	0.144008	NO
	hsa.miR.532.3p	-5.07034	7.70965	0.274437	0.600371	0.737598	0.13218	NO
	hsa.miR.24.3p	0.717069	9.11528	0.210348	0.646494	0.789752	0.102509	NO
	hsa.miR.92b.5p	-0.885613	7.75832	0.196568	0.657506	0.796833	0.0986326	NO
	hsa.miR.23a.3p	-0.506688	9.80188	0.193884	0.659704	0.796833	0.0986326	NO
	hsa.miR.1307.3p	-0.667781	8.70753	0.15628	0.692605	0.8319	0.0799288	NO
	hsa.miR.5196.5p	1.01397	7.59281	0.132141	0.716222	0.855487	0.0677864	NO
	hsa.miR.744.5p	0.348208	11.2648	0.123293	0.72549	0.85958	0.0657139	NO
	hsa.miR.34a.5p	0.447457	9.89657	0.121286	0.727644	0.85958	0.0657139	NO
	hsa.miR.1180.3p	-0.305451	10.5165	0.0806462	0.776424	0.912192	0.0399139	NO
	hsa.miR.126.3p	-0.274402	10.8279	0.0607099	0.805377	0.936201	0.0286309	NO
	hsa.miR.193b.5p	-0.478331	8.11311	0.0598078	0.8068	0.936201	0.0286309	NO
	hsa.miR.4651	0.803907	6.62554	0.0566247	0.811913	0.936201	0.0286309	NO
	hsa.miR.328.5p	-2.79451	6.80978	0.0551836	0.814277	0.936201	0.0286309	NO
	hsa.miR.181b.5p	-0.229966	9.45231	0.0301952	0.862048	0.985853	0.00618788	NO
	hsa.miR.6788.3p	-1.84563	6.63255	0.0239354	0.87705	0.996921	0.00133917	NO
	hsa.miR.6124	-1.8089	8.02172	0.0224105	0.881	0.996921	0.00133917	NO
	hsa.miR.143.3p	0.326672	7.75182	0.0204291	0.886345	0.997718	0.000992071	NO
	hsa.miR.1260b	0.135827	8.57084	0.00894863	0.924635	1	0	NO
	hsa.miR.6734.3p	-0.790845	6.88795	0.0083098	0.927367	1	0	NO
	hsa.miR.4706	-0.74735	7.51795	0.00779594	0.929643	1	0	NO
	hsa.miR.224.5p	0.129843	8.94159	0.00616941	0.937394	1	0	NO
	hsa.miR.7107.5p	-0.194907	6.59523	0.00445489	0.946785	1	0	NO
	hsa.miR.769.5p	-0.122433	7.64317	0.00394006	0.94995	1	0	NO
	hsa.miR.421	0.139161	7.96022	0.00392402	0.950052	1	0	NO
	hsa.miR.30a.3p	0.0568275	12.0604	0.00308814	0.955684	1	0	NO
	hsa.miR.221.3p	0.0545054	10.5531	0.00266605	0.958821	1	0	NO
	hsa.miR.378a.3p	-0.0344247	9.00799	0.0004959	0.982234	1	0	NO
	hsa.miR.4429	0.0111503	7.27843	2.9747e-05	0.995648	1	0	NO
	hsa.miR.365a.5p	0	7.61547	0	1	1	0	NO
	hsa.miR.365b.5p	0	7.01389	0	1	1	0	NO
	hsa.miR.376c.3p	0	7.94904	0	1	1	0	NO
	hsa.miR.485.5p	0	6.51607	0	1	1	0	NO
	hsa.miR.2392	0	7.00079	0	1	1	0	NO
	hsa.miR.6772.3p	0	7.61358	0	1	1	0	NO
	hsa.miR.6774.3p	0	8.21895	0	1	1	0	NO
	hsa.miR.6786.5p	0	7.11826	0	1	1	0	NO
	hsa.miR.6825.5p	0	3.93153	0	1	1	0	NO
	hsa.miR.6826.3p	0	6.7089	0	1	1	0	NO
	hsa.miR.6870.3p	0	6.69844	0	1	1	0	NO
	hsa.miR.7110.5p	0	7.07541	0	1	1	0	NO
	hsa.miR.12116	0	7.04595	0	1	1	0	NO

## Sheet: Table S8
Table S8 – GO Molecular Function for mRNA Targets of Top 10 Up‑regulated miRNAs (Met5a_2.8k vs MSTO_2.8k)
	ID	Description	GeneRatio	BgRatio	pvalue	p.adjust	qvalue	geneID	Count
mRNA Binding (GO:0003729)	mRNA Binding (GO:0003729)	mRNA Binding (GO:0003729)	54/1051	282/12126	1.87081e-08	1.05139e-05	9.21619e-06	AGO2/DDX6/HNRNPU/TRA2B/EIF4G3/SECISBP2L/PTBP3/NUDT21/TARDBP/RNF20/CELF1/DAZAP1/SNIP1/SHMT1/PURB/ZNF638/CPSF6/SERBP1/RBFOX2/RPS14/IGF2BP1/ZFP36L1/DDX3X/KHSRP/LARP1/RNPS1/RPL41/RPL13A/HNRNPL/DDX17/SF3B1/HNRNPA2B1/PKM/EIF4A3/ATXN2L/PABPC1/LSM14A/PABPC4L/DHX9/EIF4G2/EIF4G1/IREB2/NUP98/PCBP1/SRSF7/RNF40/IGF2BP2/SPEN/LARP4B/RSL1D1/YTHDF2/RBM24/SAMD4B/DCP1A	54
mRNA 3'-UTR Binding (GO:0003730)	mRNA 3'-UTR Binding (GO:0003730)	mRNA 3'-UTR Binding (GO:0003730)	25/1051	93/12126	2.02368e-07	5.68655e-05	4.98466e-05	HNRNPU/SECISBP2L/NUDT21/TARDBP/RNF20/CELF1/DAZAP1/SERBP1/IGF2BP1/ZFP36L1/KHSRP/LARP1/RNPS1/RPL41/DDX17/HNRNPA2B1/PABPC1/PABPC4L/ZFP36L2/ILF3/RNF40/IGF2BP2/LARP4B/RSL1D1/RBM24	25
Protein Serine/Threonine Kinase Activity (GO:0004674)	Protein Serine/Threonine Kinase Activity (GO:0004674)	Protein Serine/Threonine Kinase Activity (GO:0004674)	55/1051	342/12126	4.87577e-06	0.000667308	0.000584941	HIPK3/MAP3K3/CDK9/PAK3/PRKCI/MAPK8/DYRK2/STK17B/PAK4/MAP3K2/PLK2/BRD4/WNK3/PHKG2/PDK3/CDK12/STK26/CDK2/CAMK4/PRKAB1/ULK2/MYLK3/AKT1/ATM/CDK1/TLK2/PRKAA2/STK17A/STK4/BMP2K/WNK1/ACVR2B/NEK3/MAPKAPK5/PDPK1/PIM3/CSNK2A1/RPS6KB1/CSNK1G1/UHMK1/PLK1/BMPR1A/CDK5/CHUK/CSNK1A1/CSNK2A2/MKNK2/RPS6KA3/TOP1/CDC42BPA/PKMYT1/CDC42BPB/STK38L/MARK2/MAP3K5	55
Adenyl Ribonucleotide Binding (GO:0032559)	Adenyl Ribonucleotide Binding (GO:0032559)	Adenyl Ribonucleotide Binding (GO:0032559)	51/1051	309/12126	5.0753e-06	0.000667308	0.000584941	HNRNPU/HSPA1B/HSPA4/PRKCI/DYRK2/STK17B/BVES/WNK3/PDK3/SLC19A1/PPIP5K2/STK26/DARS2/MYO1F/AKT1/TLK2/FICD/HSPA8/RHOBTB3/STK17A/STK4/WNK1/PDE4A/ACTC1/NT5C2/TRIB1/PFKP/EIF4A3/NME1/DHX9/PFKL/UHMK1/PLK1/BMPR1A/EIF4G1/GCLC/MKNK2/MSH6/HSP90AA1/INSR/MYO9B/TOP1/CDC42BPA/PDXK/CDC42BPB/RAPGEF2/UBA2/PAPOLA/STK38L/MARK2/MAP3K5	51
Cadherin Binding (GO:0045296)	Cadherin Binding (GO:0045296)	Cadherin Binding (GO:0045296)	52/1051	319/12126	5.9369e-06	0.000667308	0.000584941	TLN1/MPRIP/DDX6/CAPZA1/EIF2S3/GOLGA3/RAN/PPFIBP1/PAK4/DBNL/LIMA1/ARGLU1/CTNNA3/CCS/WASF2/CDH8/RAB11B/LYPLA2/HSPA8/SERBP1/DDX3X/SNX1/NDRG1/LARP1/NCK1/BSG/FSCN1/BMPR2/CRKL/YWHAE/RAB10/EZR/ADD1/PFKP/PKM/PLEC/SPTBN1/ATXN2L/MACF1/YWHAB/EIF4G2/CTNNA1/PCBP1/SPTAN1/GPRC5A/RSL1D1/SH3GLB1/ZC3H15/AHNAK/CCNB2/MARK2/FASN	52
Purine Ribonucleoside Triphosphate Binding (GO:0035639)	Purine Ribonucleoside Triphosphate Binding (GO:0035639)	Purine Ribonucleoside Triphosphate Binding (GO:0035639)	69/1051	476/12126	1.30121e-05	0.00120802	0.00105891	NRAS/RHOA/GNAQ/HNRNPU/HSPA1B/HSPA4/PRKCI/RAN/RAP1B/DYRK2/STK17B/LSG1/RRAGC/WNK3/TUBB2A/PDK3/PPIP5K2/STK26/RAB21/TUBB4A/DARS2/RAB11B/MYO1F/AKT1/RAB2A/TLK2/RHOB/FICD/HSPA8/ARF6/RHOBTB3/STK17A/TUBB8/STK4/WNK1/PCK1/RAP2B/DIRAS2/RAB33B/ACTC1/NT5C2/RAB10/TRIB1/PFKP/EIF4A3/NME1/DHX9/PFKL/UHMK1/PLK1/BMPR1A/EIF4G1/MKNK2/MSH6/HSP90AA1/INSR/RAB8A/MYO9B/TOP1/CDC42BPA/PDXK/CDC42BPB/UBA2/PAPOLA/STK38L/ARL5B/AR…	69
ATP Binding (GO:0005524)	ATP Binding (GO:0005524)	ATP Binding (GO:0005524)	46/1051	279/12126	1.50465e-05	0.00120802	0.00105891	HNRNPU/HSPA1B/HSPA4/PRKCI/DYRK2/STK17B/WNK3/PDK3/PPIP5K2/STK26/DARS2/MYO1F/AKT1/TLK2/FICD/HSPA8/RHOBTB3/STK17A/STK4/WNK1/ACTC1/NT5C2/TRIB1/PFKP/EIF4A3/NME1/DHX9/PFKL/UHMK1/PLK1/BMPR1A/EIF4G1/MKNK2/MSH6/HSP90AA1/INSR/MYO9B/TOP1/CDC42BPA/PDXK/CDC42BPB/UBA2/PAPOLA/STK38L/MARK2/MAP3K5	46
Single-Stranded DNA Binding (GO:0003697)	Single-Stranded DNA Binding (GO:0003697)	Single-Stranded DNA Binding (GO:0003697)	20/1051	96/12126	0.000176521	0.0124006	0.01087	MCM10/HMGB2/HNRNPU/MCM4/MCM9/CTC1/PURB/SSBP2/HNRNPA1/SUB1/HMGB1/MAPT/DHX9/RPA1/TOP3A/MCM7/PCBP1/RAD23B/TOP1/SPRTN	20
Kinase Inhibitor Activity (GO:0019210)	Kinase Inhibitor Activity (GO:0019210)	Kinase Inhibitor Activity (GO:0019210)	10/1051	34/12126	0.000435422	0.0240426	0.021075	CDK1/CDKN1B/SOCS1/DNAJC3/CDKN1A/NCK1/TRIB1/YWHAB/GMFB/LRP6	10
Transcription Regulatory Region Nucleic Acid Binding (GO:0001067)	Transcription Regulatory Region Nucleic Acid Binding (GO:0001067)	Transcription Regulatory Region Nucleic Acid Binding (GO:0001067)	35/1051	224/12126	0.000439258	0.0240426	0.021075	SOX4/WT1/CEBPB/HMGB2/FOXK2/NFYA/SIX1/TP73/YY1/BRD4/TBL1XR1/ZNF568/TCF7L2/HINFP/MAFK/ELK1/TFAP2A/FOXK1/NKX2-5/FOS/HMGB1/ZBTB20/ZBTB46/HDAC5/HNRNPL/ZBED6/CEBPA/FOXO3/CHD3/DHX9/YAP1/CTCF/ATF7/RNF10/XRCC5	35
Protein Kinase Regulator Activity (GO:0019887)	Protein Kinase Regulator Activity (GO:0019887)	Protein Kinase Regulator Activity (GO:0019887)	20/1051	103/12126	0.000470585	0.0240426	0.021075	CCND2/CCNF/CCNY/AKT1/CDKN1B/SOCS1/DNAJC3/CDKN1A/WNK1/NCK1/MOB1A/TRIB1/YWHAB/CCND1/CCNA2/GMFB/PRKAR2A/GPRC5A/CCNB2/MARK2	20
mRNA 5'-UTR Binding (GO:0048027)	mRNA 5'-UTR Binding (GO:0048027)	mRNA 5'-UTR Binding (GO:0048027)	8/1051	24/12126	0.000646302	0.0295005	0.0258592	SHMT1/RPS14/IGF2BP1/DDX3X/LARP1/RPL41/IGF2BP2/RSL1D1	8
Cyclin-Dependent Protein Serine/Threonine Kinase Activator Activity (GO:0061575)	Cyclin-Dependent Protein Serine/Threonine Kinase Activator Activity (GO:0061575)	Cyclin-Dependent Protein Serine/Threonine Kinase Activator Activity (GO:0061575)	6/1051	14/12126	0.000682395	0.0295005	0.0258592	CCND2/CCNY/CCNT1/CCNT2/CKS2/CCND1	6
Poly-Purine Tract Binding (GO:0070717)	Poly-Purine Tract Binding (GO:0070717)	Poly-Purine Tract Binding (GO:0070717)	9/1051	31/12126	0.000931804	0.0374053	0.0327883	HNRNPU/HNRNPDL/DAZAP1/PABPN1/DDX3X/MCRS1/EIF4A3/PABPC1/PABPC4L	9

## Sheet: Table S9
Table S9 – GO Molecular Function for mRNA Targets of Top 10 Down‑regulated miRNAs (Met5a_2.8k vs MSTO_2.8k)
	ID	Description	GeneRatio	BgRatio	pvalue	p.adjust	qvalue	geneID	Count
Cadherin Binding (GO:0045296)	Cadherin Binding (GO:0045296)	Cadherin Binding (GO:0045296)	290/8517	319/12126	1.17e-19	8.13e-17	6.09e-17	DDX6/HSPA1A/ANXA1/BMPR2/ACVR1/ARHGAP1/RAN/GPRC5A/SNX5/TMOD3/MB21D2/HSPA8/SERBP1/EGFR/TLN1/CRKL/CNN3/DDX3X/EEF1G/EEF2/EPHA2/EIF5/FLNA/HSPA5/DNAJB1/EIF3E/KDR/KIF5B/PAK2/PCMT1/PLEC/PTPRJ/RAB1A/RANGAP1/RPL6/SLC3A2/SPTBN2/VCL/RPL14/BZW1/CKAP5/PDLIM5/PTPRT/ATXN2L/LYPLA2/STK38/DOCK9/LARP1/MACF1/CD2AP/TES/RSL1D1/SND1/LIMA1/UBFD1/RTN4/PHLDB2/USP8/KLC2/BSG/PCDHGB4/FASN/VASN/RPS2/CCT8/RDX/EIF2S3/AHSA1/TWF1/…	290
Protein Serine/Threonine Kinase Activity (GO:0004674)	Protein Serine/Threonine Kinase Activity (GO:0004674)	Protein Serine/Threonine Kinase Activity (GO:0004674)	300/8517	342/12126	7.27e-15	2.52e-12	1.89e-12	CDK6/IKBKB/TGFBR2/CDK4/TGFBR1/MAP3K12/ACVR1/CSNK2A1/DAPK1/MAP3K9/PRKAA1/MAPK1/RPS6KA5/STK38L/CDK19/TAOK1/WNK3/MASTL/SIK1/CHEK2/MAPKAPK5/SGK3/EGFR/RAF1/PIM1/AURKB/PLK1/CDK2/ACVR2A/CAMK2G/CDK1/CDK9/CHEK1/CHUK/DMPK/MTOR/GSK3B/IRAK2/PAK2/PRKAB2/MAP4K2/RPS6KA3/RPS6KB1/SRPK1/MAP3K7/ULK1/DYRK3/PPM1D/CASK/LATS1/MAPKAPK2/TLK1/CAMKK2/IRAK3/STK38/STK33/MINK1/CSNK1E/RIOK3/PRKCD/CAMKV/AKT3/SQSTM1/ACVR2B/DYRK2…	300
Ubiquitin-Like Protein Transferase Activity (GO:0019787)	Ubiquitin-Like Protein Transferase Activity (GO:0019787)	Ubiquitin-Like Protein Transferase Activity (GO:0019787)	217/8517	240/12126	2.38e-14	5.51e-12	4.13e-12	HACE1/XIAP/TRIM37/CNOT4/UBE2D2/UBE2D3/CUL3/KLHL21/DTX4/MYLIP/KCTD10/TRIM4/RAG1/RLIM/FBXW11/BRCA1/BTRC/LMO7/UBE2H/CUL2/CBX4/CDC23/UBE2C/TRIM32/FBXO3/UBE2S/UFC1/MIB1/SMURF2/ZNRF3/UBE2Q2/UBR3/RNF217/RNF144B/PEX12/SMURF1/ARIH1/RBBP6/ZNRF1/RNF168/BRAP/HUWE1/ATG16L1/TRIM23/STUB1/NEDD4L/UHRF2/FANCL/ATG5/TRIM28/PRPF19/RNF220/RNF135/PDZRN3/MDM4/TNFSF13B/UBE2N/VHL/LRSAM1/TRIM27/TRIM2/UBE2I/TRAF6/ITCH/HDAC4…	217
Ubiquitin Protein Ligase Binding (GO:0031625)	Ubiquitin Protein Ligase Binding (GO:0031625)	Ubiquitin Protein Ligase Binding (GO:0031625)	241/8517	271/12126	9.95e-14	1.73e-11	1.29e-11	BCL2/TPI1/HSPA1A/JUN/SMAD5/HIF1A/TRIM37/UBB/UBE2D2/UBE2D3/FZD6/CUL3/PPARGC1A/CHEK2/RPS27A/USP13/HSPA8/TXNIP/HSPD1/CDKN1A/EGFR/CLU/BRCA1/TP53/PA2G4/AXIN2/FBXW7/AUP1/CALR/GSK3B/DNAJA1/HSPA1B/HSPA5/HSPA9/HSP90AA1/SMAD3/SMAD7/PRKAR1A/PRKAR2A/RPL5/SKI/TMBIM6/VCL/BAG6/CUL4A/CUL2/BAG4/MFN2/SCAMP3/LRPPRC/ERLIN2/GABARAP/HSPBP1/GABARAPL1/LAPTM4B/RTN4/SYT11/TCP1/TUBB2A/TRAF4/ARIH1/OTUB1/HM13/POLR2A/SQSTM1/A…	241
Ubiquitin-Like Protein Ligase Binding (GO:0044389)	Ubiquitin-Like Protein Ligase Binding (GO:0044389)	Ubiquitin-Like Protein Ligase Binding (GO:0044389)	255/8517	289/12126	1.68e-13	2.33e-11	1.75e-11	BCL2/TPI1/HSPA1A/JUN/SMAD5/HIF1A/TRIM37/UBB/UBE2D2/UBE2D3/FZD6/CUL3/PPARGC1A/CHEK2/RPS27A/USP13/HSPA8/TXNIP/HSPD1/CDKN1A/EGFR/CLU/BRCA1/TP53/PA2G4/AXIN2/FBXW7/AUP1/CALR/GSK3B/DNAJA1/HSPA1B/HSPA5/HSPA9/HSP90AA1/SMAD3/SMAD7/PRKAR1A/PRKAR2A/RPL5/SKI/TMBIM6/VCL/BAG6/CUL4A/CUL2/BAG4/MFN2/SCAMP3/LRPPRC/UBE2C/ERLIN2/GABARAP/HSPBP1/GABARAPL1/LAPTM4B/RTN4/SYT11/TCP1/TUBB2A/TRAF4/ARIH1/OTUB1/HM13/POLR2A/SQ…	255
GTPase Regulator Activity (GO:0030695)	GTPase Regulator Activity (GO:0030695)	GTPase Regulator Activity (GO:0030695)	361/8517	424/12126	2.78e-13	3.21e-11	2.41e-11	JUN/ARHGAP1/SEC23B/RACGAP1/STARD13/WASL/SLC38A9/EIF5/RANGAP1/VAV2/LAMTOR3/EIF2B2/EIF2B5/ARHGAP32/IPO7/LAMTOR5/AKAP13/DOCK9/ARL2BP/SH3BP4/LAMTOR2/RHOF/LAMTOR1/RALGAPB/TBC1D14/SIPA1L2/DOCK5/TBC1D20/CPEB2/DOCK11/FLCN/DENND6A/CCDC88C/OCRL/RAB3IP/NPRL3/IPO5/SBF1/RIC1/LLGL1/RGL2/EIF2B4/MYCBP2/RALGPS2/ARHGAP28/PDE6D/SMCR8/EIF2B1/NUCB1/TRIO/TBC1D4/SEC23A/GNA13/RASGRP3/DOCK7/ELMOD2/OPHN1/TBC1D10B/RGS16/GA…	361
Purine Ribonucleoside Triphosphate Binding (GO:0035639)	Purine Ribonucleoside Triphosphate Binding (GO:0035639)	Purine Ribonucleoside Triphosphate Binding (GO:0035639)	391/8517	476/12126	9.21e-10	9.13e-08	6.84e-08	RAB21/HSPA1A/MSH2/RHOT1/CDK6/CAPRIN1/DNM2/TGFBR1/RUNX3/ACVR1/DAPK1/RAB5A/RAN/RPS6KA5/STK38L/RAB14/TAOK1/RRAGD/ABCG8/WNK3/SIK1/HSPA8/PXK/TUBA1A/KRAS/PIM1/RAB1B/PLK1/ABCF1/ARL2/ARL3/DMPK/EEF1A1/EIF4G1/HSPA1B/HSPA5/HSP90AA1/LIG4/PDK4/MAP4K2/SRPK1/DYRK3/PDXK/EIF2B2/LATS1/LONP1/BMS1/TLK1/KIF14/ABCF2/TUBB4B/IRAK3/STK38/HSPA4L/GTPBP4/MTHFD1L/VPS4A/YARS2/RHOF/LSG1/TSR1/RAP2C/ATL2/TUBA1C/RASEF/DHX36/RHOV/…	391
GTPase Binding (GO:0051020)	GTPase Binding (GO:0051020)	GTPase Binding (GO:0051020)	196/8517	225/12126	1.47e-09	1.24e-07	9.31e-08	GOLGA5/HACE1/ARHGAP1/RRAGD/RAB34/PPP6R1/RAF1/BIRC5/FLNA/GNB1/GNB2/HSP90AA1/MYO5A/MYO5B/YBX1/PAK2/RABGGTB/RANGAP1/ULK1/YBX3/AIMP1/CIB1/NCKAP1/AKAP13/ATG14/GGA3/TNPO3/SH3BP4/AP3M1/LAMTOR1/XPO4/GCC1/DOCK5/TBC1D20/OCRL/KIF3B/RIC1/RANBP9/MYCBP2/EXOC8/PDE6D/RAB11FIP4/RAB29/RCC2/ATG16L1/LCP1/PICALM/BECN1/EXOC2/DOCK7/SIKE1/BRAF/MEGF9/SOD1/GAPVD1/PLEKHG2/FGD4/DVL3/NGFR/RGP1/MYO1C/RHOBTB3/ABI2/ENO1/KIF3A/C…	196
Kinase Binding (GO:0019900)	Kinase Binding (GO:0019900)	Kinase Binding (GO:0019900)	378/8517	460/12126	1.61e-09	1.24e-07	9.31e-08	CENPJ/CCND3/CCND1/IKBKB/ESR1/HIF1A/CCND2/CCNA2/MAP3K12/STAT3/PARP1/BTG1/CALM2/MAPRE3/ZFYVE26/RACGAP1/MAVS/SIK1/CHEK2/TCF7L2/SLC12A7/ZBTB4/MYCN/RAB11FIP2/RNF138/CDKN2A/CDKN1A/CDC25A/EGFR/AURKB/PLK1/JAK2/AXIN2/ELAVL1/ACTB/AP2A1/CLTC/CRK/CYLD/EEF1A1/EEF2/FLNA/GRB2/GSK3B/HTT/SMAD3/PAK2/PRKAB2/MAP2K3/PTPRJ/RPS6/SKI/SLC12A2/TFRC/UBE2V1/UXT/LATS1/TELO2/KIF14/CDC37/IRAK3/CHP1/CDK5RAP1/LAPTM4B/TBC1D14/CAC…	378
Small GTPase Binding (GO:0031267)	Small GTPase Binding (GO:0031267)	Small GTPase Binding (GO:0031267)	174/8517	199/12126	6.51e-09	4.52e-07	3.38e-07	GOLGA5/HACE1/ARHGAP1/RAB34/PPP6R1/RAF1/BIRC5/FLNA/MYO5A/MYO5B/PAK2/RABGGTB/RANGAP1/ULK1/YBX3/CIB1/NCKAP1/AKAP13/GGA3/TNPO3/SH3BP4/AP3M1/XPO4/GCC1/DOCK5/TBC1D20/OCRL/KIF3B/RIC1/RANBP9/MYCBP2/EXOC8/PDE6D/RAB11FIP4/RAB29/RCC2/PICALM/EXOC2/DOCK7/SIKE1/BRAF/MEGF9/SOD1/GAPVD1/PLEKHG2/FGD4/DVL3/NGFR/RGP1/MYO1C/RHOBTB3/ABI2/KIF3A/CAV1/TRIP11/IQGAP1/PAK1/RTKN/AP1G1/ATP6AP1/BICD1/CHM/PKN1/RABGGTA/EVI5/DOCK…	174
Guanyl-Nucleotide Exchange Factor Activity (GO:0005085)	Guanyl-Nucleotide Exchange Factor Activity (GO:0005085)	Guanyl-Nucleotide Exchange Factor Activity (GO:0005085)	177/8517	203/12126	7.87e-09	4.97e-07	3.72e-07	SLC38A9/VAV2/LAMTOR3/EIF2B2/EIF2B5/LAMTOR5/AKAP13/DOCK9/LAMTOR2/RHOF/LAMTOR1/DOCK5/DOCK11/DENND6A/CCDC88C/RAB3IP/SBF1/RIC1/RGL2/EIF2B4/MYCBP2/RALGPS2/SMCR8/EIF2B1/NUCB1/TRIO/GNA13/RASGRP3/DOCK7/GAPVD1/PLEKHG2/BCR/FGD4/VAV3/SOS2/TBXA2R/RGP1/RABIF/ARF4/ARHGEF3/RASGRP1/BMP1/ECT2/RAPGEF1/NUCB2/RAP1A/RASGRF1/ARHGEF5/GBF1/KALRN/SH3BP5/ARHGEF10/RAPGEF2/DOCK4/PREB/FARP1/ARFGEF1/RAPGEF4/DENND3/RAB3GAP1/AR…	177
DNA-binding Transcription Factor Binding (GO:0140297)	DNA-binding Transcription Factor Binding (GO:0140297)	DNA-binding Transcription Factor Binding (GO:0140297)	238/8517	282/12126	1.88e-08	1.09e-06	8.13e-07	BCL2/JUN/HOXA7/PPARA/MYC/HIF1A/PPARG/KLF4/STAT3/PARP1/YY1/PPARGC1A/ZFPM2/SIK1/ZBTB8A/TCF7L2/ZBTB7A/HMGA2/CENPF/CRKL/RUNX1T1/TBP/TP53/YAP1/CCNT1/EIF4E/FLNA/GSK3B/RBPJ/SMAD3/PURA/SKI/TCF3/BHLHE40/SPEN/CNOT7/LYAR/TXLNG/DMAP1/NUCKS1/CARM1/RPS3/TAF9/GATA6/HAND1/YWHAZ/CTNNB1/HDAC1/JUP/NEUROD1/SMARCA1/RBFOX2/MTDH/UHRF2/CREM/TFDP1/ZMYND8/TTC8/CHD4/HNF4A/PURB/CBX5/PPARD/STK4/CREB1/FHL2/NFYB/VHL/TCF23/HES1…	238
mRNA Binding (GO:0003729)	mRNA Binding (GO:0003729)	mRNA Binding (GO:0003729)	237/8517	282/12126	4.36e-08	2.33e-06	1.74e-06	DDX6/TIA1/CAPRIN1/GRSF1/FXR1/QKI/SECISBP2L/PUM2/RBM20/RBMS1/SERBP1/TP53/LARP4/AGO2/ELAVL1/CALR/DDX3X/EIF4G1/HNRNPA2B1/NUP98/RPL5/MRPL12/SRSF1/SUPT5H/YBX3/EIF4G3/PABPC4/FUBP1/N4BP1/PUM1/G3BP2/LRPPRC/ATXN2L/CPEB3/SLC4A1AP/SPEN/CLUH/LARP1/GEMIN5/RSL1D1/RBMS3/ZNF638/RBM15B/LUC7L3/LUC7L/CPSF7/EDC3/UTP23/CPEB2/DHX36/RNPS1/POLDIP3/RPS3/RPS5/HNRNPL/YTHDC1/RPS2/RPS3A/IGF2BP1/TYMS/FXR2/TRA2B/IGF2BP3/LSM14A…	237
RNA Polymerase II-specific DNA-binding Transcription Factor Binding (GO:0061629)	RNA Polymerase II-specific DNA-binding Transcription Factor Binding (GO:0061629)	RNA Polymerase II-specific DNA-binding Transcription Factor Binding (GO:0061629)	194/8517	228/12126	1.09e-07	5.39e-06	4.04e-06	JUN/PPARA/HIF1A/PPARG/KLF4/STAT3/PARP1/PPARGC1A/ZFPM2/ZBTB8A/TCF7L2/CDKN2A/NR1I2/HMGA2/CRKL/TBP/TP53/GSK3B/DNAJA1/RBPJ/SMAD3/SMARCA4/TCF3/BHLHE40/CPNE1/PTPRT/TRIM32/SPEN/GABARAPL1/DMAP1/BAZ2A/ACTN4/GATA6/NFKBIA/HAND1/NCOA3/CTNNB1/HDAC1/NEUROD1/SMARCA1/TAF4B/MTDH/UHRF2/TTC8/CHD4/HNF4A/STK4/CREB1/ADD1/TCF23/SMARCE1/DLL1/HES1/MAPK14/NCOA2/DNMT3A/HMGB1/MDFIC/AHR/ID2/SIRT1/REST/HDAC4/FOS/MED1/MEF2D/TR…	194
ATP Binding (GO:0005524)	ATP Binding (GO:0005524)	ATP Binding (GO:0005524)	233/8517	279/12126	1.7e-07	7.76e-06	5.81e-06	HSPA1A/MSH2/CDK6/CAPRIN1/TGFBR1/RUNX3/ACVR1/DAPK1/RPS6KA5/STK38L/TAOK1/ABCG8/WNK3/SIK1/HSPA8/PXK/PIM1/PLK1/ABCF1/DMPK/EIF4G1/HSPA1B/HSPA5/HSP90AA1/LIG4/PDK4/MAP4K2/SRPK1/DYRK3/PDXK/EIF2B2/LATS1/LONP1/TLK1/KIF14/ABCF2/IRAK3/STK38/HSPA4L/MTHFD1L/VPS4A/YARS2/DHX36/MINK1/PPIP5K2/ABCC6/PIP4K2B/AKT3/TNK1/ATP1A1/DYRK2/TWF1/ABL1/ACTC1/SLC12A4/DARS2/N4BP2/NOL9/MYH9/ACVR1B/ATP1A2/WNK1/HSPA4/RAD51/UBA2/MYH1…	233
Adenyl Ribonucleotide Binding (GO:0032559)	Adenyl Ribonucleotide Binding (GO:0032559)	Adenyl Ribonucleotide Binding (GO:0032559)	256/8517	309/12126	1.79e-07	7.76e-06	5.81e-06	HSPA1A/MSH2/CDK6/CAPRIN1/TGFBR1/RUNX3/ACVR1/DAPK1/RPS6KA5/STK38L/TAOK1/ABCG8/WNK3/SIK1/HSPA8/PXK/PIM1/PLK1/ABCF1/DMPK/EIF4G1/HSPA1B/HSPA5/HSP90AA1/LIG4/PDE4D/PDK4/MAP4K2/SRPK1/DYRK3/PDXK/EIF2B2/LATS1/LONP1/TLK1/KIF14/ABCF2/IRAK3/STK38/HSPA4L/MTHFD1L/VPS4A/YARS2/DHX36/MINK1/SLC19A1/PPIP5K2/ABCC6/PIP4K2B/AKT3/CFAP45/TNK1/ATP1A1/DYRK2/MIEF1/TWF1/ABL1/ACTC1/GCLC/SLC12A4/DARS2/N4BP2/NOL9/MYH9/ACVR1B/A…	256
Protein Tyrosine Phosphatase Activity (GO:0004725)	Protein Tyrosine Phosphatase Activity (GO:0004725)	Protein Tyrosine Phosphatase Activity (GO:0004725)	70/8517	76/12126	3.24e-06	0.000132148	9.9e-05	CDC14B/PTPN4/PTPRG/TIMM50/DUSP18/PTEN/CDC25A/PTPRD/PTPN3/PTPRJ/MTMR3/PTPRT/PTPN18/PTP4A1/EYA2/PGPEP1/PTPRK/PTPN14/PPP2CA/PTPRF/HACD2/MTMR6/PTK2/PTPRN2/PTPRO/CDC25B/DUSP3/DUSP7/DUSP8/PTPN1/PTPN9/PTPN11/PTPRA/PTPRB/PTPRE/PTPRM/PTPRZ1/PTP4A2/PTPRU/PTP4A3/PTPN5/DUSP4/EYA3/PTPN21/PTPN23/TNS2/PTPN12/EYA4/CDKN3/DUSP2/CDC25C/DUSP1/DUSP5/EYA1/PTPRR/DUSP10/DUSP16/UBASH3B/PTPRN/PTPN6/PTPRS/DUSP22/DUSP6/DUSP…	70
Ubiquitin-Protein Transferase Activity (GO:0004842)	Ubiquitin-Protein Transferase Activity (GO:0004842)	Ubiquitin-Protein Transferase Activity (GO:0004842)	329/8517	412/12126	4.55e-06	0.000175605	0.000131577	HACE1/HERC6/RNF149/XIAP/TRIM37/CNOT4/UBE2D2/UBE2D3/CUL3/KLHL21/DTX4/RNF11/MYLIP/RNF125/KCTD10/TRIM4/RAG1/RLIM/FBXW11/RNF138/UBE2Q1/BRCA1/BTRC/LMO7/PPP1R11/UBE2H/CUL4A/CUL2/CDC23/UBE3C/UBE2C/TRIM32/FBXO3/UBE2S/TRIM44/RNF111/MIB1/SMURF2/UBE2Z/ZNRF3/UBE2Q2/UBR3/RNF38/RNF217/LONRF2/ZNRF2/RNF144B/NHLRC3/PEX12/SMURF1/ARIH1/RBBP6/BSPRY/ZNRF1/RNF168/TRIM35/BFAR/NEURL4/BRAP/HUWE1/MYCBP2/SYVN1/TRIM23/TRIP1…	329
Transmembrane Receptor Protein Tyrosine Kinase Activity (GO:0004714)	Transmembrane Receptor Protein Tyrosine Kinase Activity (GO:0004714)	Transmembrane Receptor Protein Tyrosine Kinase Activity (GO:0004714)	48/8517	50/12126	4.99e-06	0.00018243	0.000136691	FGFR1/IGF2R/MET/PDGFRA/MERTK/EGFR/EPHA2/IGF1R/KDR/CRIM1/FGFR4/TYRO3/EPHB4/KIT/ERBB2/AXL/ERBB4/DDR1/FGFR2/FLT1/ROR1/PDGFRB/EFEMP1/NELL2/MST1R/TIE1/RYK/NTRK3/EPHA1/EPHA5/FLT3/INSR/ROR2/DDR2/RET/ROS1/TEK/FGFRL1/CSF1R/FLT4/EPHB3/EPHB6/EPHA3/FGFR3/NTRK2/MUSK/NELL1/NTRK1	48
Microtubule Binding (GO:0008017)	Microtubule Binding (GO:0008017)	Microtubule Binding (GO:0008017)	197/8517	239/12126	9.21e-06	0.000319576	0.000239452	S100A9/DNM2/JMY/PRNP/CLIP1/MAPRE3/CAMSAP2/SUN2/RACGAP1/KIF13A/WASL/FBXW11/KIF2A/EML4/KIF23/PLK1/BIRC5/ARL3/FNTA/KIF5A/KIF5B/MAP4/PAFAH1B1/PEX14/CLIP2/ZNF207/UXT/CKAP5/KIF14/LRPPRC/TUBGCP2/KIF2C/CHP1/KIF1B/CLASP1/MACF1/RMDN1/CAMSAP1/CCDC88C/CAMSAP3/POLB/KIF3B/RPS3/HAUS6/KIF27/MTUS1/REEP2/KIF18B/RCC2/TBCB/VAPA/GABARAPL2/NDEL1/MAP1LC3B/NDE1/ALMS1/EZR/FTCD/FGF13/PRC1/KIFC1/KIF1C/KIF21A/KIF3A/GAS2L1/K…	197
Magnesium Ion Binding (GO:0000287)	Magnesium Ion Binding (GO:0000287)	Magnesium Ion Binding (GO:0000287)	132/8517	155/12126	1.08e-05	0.000355938	0.000266697	MSH2/PRIM1/HPRT1/RAN/STK38L/SIK1/PLK1/ABL2/IDH3A/PSPH/SRPK1/DYRK3/PDXK/LATS1/CIB1/MTHFD2/IRAK3/STK38/NT5C3A/EXD2/DHX36/NUDT3/DYRK2/PGM1/ABL1/FSCN1/GCLC/IDH1/PLSCR1/EYA2/PGPEP1/UBA2/STK4/YDJC/IDH2/PLSCR3/RP2/DUT/EXTL3/GEM/MSH6/FOXK2/ITGB1/MVK/OPA1/PRKACB/SRPK2/STK3/TOP2A/CDC42BPA/SPHK1/CDC42BPB/OXSR1/PAPOLA/MAST1/MTPAP/PI4K2A/ENOSF1/DCTPP1/PIF1/NUDT12/LRRK2/GSS/WRN/MARK2/NUDT16/IDH3G/MAP3K6/MAP3K5…	132
GTPase Activator Activity (GO:0005096)	GTPase Activator Activity (GO:0005096)	GTPase Activator Activity (GO:0005096)	175/8517	211/12126	1.38e-05	0.000435931	0.000326634	JUN/ARHGAP1/SEC23B/RACGAP1/STARD13/RANGAP1/ARHGAP32/RALGAPB/TBC1D14/SIPA1L2/TBC1D20/FLCN/OCRL/NPRL3/LLGL1/ARHGAP28/TBC1D4/SEC23A/RASGRP3/ELMOD2/OPHN1/TBC1D10B/RGS16/BCR/VAV3/STARD8/TBC1D9B/RAP1GAP2/RP2/IQGAP1/RASA1/ERRFI1/ARHGAP5/BNIP2/ECT2/GNAQ/LLGL2/MYO9A/NF1/RGS3/TBCD/THY1/EVI5/RANBP3/RGS20/ASAP2/DEPDC5/RAPGEF2/PREB/ARFGEF1/GNB5/RAB3GAP1/TBC1D2B/TBC1D9/TBC1D12/TBC1D30/RABGAP1/ASAP1/FAM13B/TBC1…	175
Nuclear Receptor Binding (GO:0016922)	Nuclear Receptor Binding (GO:0016922)	Nuclear Receptor Binding (GO:0016922)	100/8517	115/12126	1.94e-05	0.000586065	0.000439127	GTF2H1/HMGA1/ESR1/HIF1A/PPARGC1A/TCF7L2/ZBTB7A/NR1I2/CALR/SMAD3/SMARCA4/YWHAH/LATS1/MED13/DCAF13/MMS19/DDX54/THRAP3/MED12/BAZ2A/ASXL1/PAGR1/NR4A1/LCOR/NCOA3/CTNNB1/PPID/STRN/TRIP12/PHB2/KDM3A/PPARGC1B/TMF1/MED16/FOXP1/STAT5B/ZNF366/SMARCE1/GAS2L1/DDX5/NCOA2/SIRT1/MED1/TACC2/EP300/PRKCB/PKN1/PROX1/RNF6/TACC1/TAF1/TRIP6/NRIP1/KDM5D/ARID1A/PARK7/MED4/TRERF1/NCOA7/NCOR1/HMGN3/RXRA/NCOA1/CRY1/MED14/ME…	100
General Transcription Initiation Factor Binding (GO:0140296)	General Transcription Initiation Factor Binding (GO:0140296)	General Transcription Initiation Factor Binding (GO:0140296)	30/8517	30/12126	2.46e-05	0.000710569	0.000532415	JUN/ESR1/THRA/TBP/TP53/TAF13/THAP7/RUVBL1/ZFP36L2/DR1/FOXF2/GTF2A1/HHEX/TAF1/DRAP1/ZBTB43/GTF2F1/TAF1B/GTF2B/RELA/TAF12/HSF1/BCL10/YEATS2/RUVBL2/PSMC5/AKR1B1/GTF2A2/TAF11/TAF1L	30
mRNA 3'-UTR Binding (GO:0003730)	mRNA 3'-UTR Binding (GO:0003730)	mRNA 3'-UTR Binding (GO:0003730)	82/8517	93/12126	3.51e-05	0.000958871	0.000718463	TIA1/FXR1/SECISBP2L/PUM2/RBMS1/SERBP1/TP53/LARP4/ELAVL1/HNRNPA2B1/RPL5/YBX3/PABPC4/PUM1/LRPPRC/CPEB3/LARP1/GEMIN5/RSL1D1/RBMS3/UTP23/CPEB2/DHX36/RNPS1/IGF2BP1/FXR2/IGF2BP3/ZFP36L1/CIRBP/TIAL1/LARP4B/PABPC1/CPEB4/CELF1/CPSF1/RBM4/HNRNPU/RBMS2/ZFP36/ELAVL3/RPS7/TARDBP/ZFP36L2/RBM47/DDX5/FMR1/ILF3/DDX17/CELF2/HNRNPA0/NUDT21/CCT5/ZNF385A/CSDC2/ANGEL2/RBM24/HNRNPC/CPEB1/PCBP4/MEX3D/DAZAP1/RC3H1/TUT1/A…	82
Nuclear Receptor Coactivator Activity (GO:0030374)	Nuclear Receptor Coactivator Activity (GO:0030374)	Nuclear Receptor Coactivator Activity (GO:0030374)	47/8517	50/12126	3.59e-05	0.000958871	0.000718463	HMGA1/PPARGC1A/ENY2/FGF2/MED13/ATXN7L3/THRAP3/MED12/CARM1/ACTN4/NCOA3/SOX9/PPARGC1B/SS18/TMF1/ZMIZ2/CNOT6/NCOA2/MED1/PRKCB/PKN1/TACC1/MED4/CCAR1/TRERF1/ZMIZ1/NCOA7/DCAF6/HELZ2/CALCOCO1/NCOA1/MED14/MED17/USP22/ETS1/ELK1/RNF4/BRD8/KDM1A/NCOA6/PPRC1/WDR77/SFR1/RBM14/MED22/PSMC3IP/MED30	47
Basal RNA Polymerase II Transcription Machinery Binding (GO:0001099)	Basal RNA Polymerase II Transcription Machinery Binding (GO:0001099)	Basal RNA Polymerase II Transcription Machinery Binding (GO:0001099)	35/8517	36/12126	4.78e-05	0.0012259	0.000918541	RPRD2/TBP/AGO2/WDR43/RPRD1B/NCOA3/RPRD1A/CDC73/HNRNPU/GTF2A1/SUPT4H1/TAF1/CTR9/DRAP1/ELP2/ZNF326/RECQL5/DHX9/GTF2F1/PCF11/WAC/ELP4/GTF2B/ERCC5/ESRRB/UVSSA/PEX2/URI1/SCAF8/CCAR2/AKR1B1/GTF2A2/LLPH/ELOF1/SMYD2	35
Kinase Activity (GO:0016301)	Kinase Activity (GO:0016301)	Kinase Activity (GO:0016301)	92/8517	106/12126	4.95e-05	0.0012259	0.000918541	BMPR2/CSNK2A1/TAOK1/MASTL/IPMK/ACVR2A/CDK1/CDK9/MTOR/GSK3B/PDXK/RFK/ETNK1/AGK/IPPK/PPIP5K2/PANK1/PIK3CD/TRRAP/CDC7/ADPGK/IP6K3/FN3K/CAMK2A/IP6K1/PAPSS2/AKT1/EPHA4/MVK/PIK3C3/PIK3CA/PIK3CB/PKN2/TAF1/CDK5R1/SPHK1/PRKD3/NMRK1/TRIB3/PANK3/LRRK2/PGM2L1/CKMT1A/PGK1/ACVRL1/GALK2/NADK2/NADK/MAP4K4/CHKA/ITPKB/PI4KA/DGKE/PMVK/STK39/PANK4/CDKL5/POMK/CCL3/IRAK1/CDK5/DGKA/NEK1/PIK3CG/EIF2AK2/DGKZ/PKMYT1/DOLK/…	92
Ubiquitin-Like Protein Conjugating Enzyme Activity (GO:0061650)	Ubiquitin-Like Protein Conjugating Enzyme Activity (GO:0061650)	Ubiquitin-Like Protein Conjugating Enzyme Activity (GO:0061650)	34/8517	35/12126	6.64e-05	0.00158841	0.00119016	UBE2D2/UBE2D3/UBE2Q1/UBE2H/UBE2C/UBE2S/UFC1/UBE2Z/UBE2Q2/UBE2N/UBE2I/UBE2K/TAF1/UBE2D1/UBE2G1/UBE2J1/UBE2R2/UBE2W/UBE2O/UBE2A/UBE2E2/CDC34/UBE2E1/UBE2L3/UBE2QL1/UBE2G2/UBE2L6/UBE2E3/UBE2T/UBE2D4/UBE2NL/UBE2B/UBE2J2/UBE2F	34
Ubiquitin Binding (GO:0043130)	Ubiquitin Binding (GO:0043130)	Ubiquitin Binding (GO:0043130)	71/8517	80/12126	7.23e-05	0.00167363	0.00125402	USP13/FBXW7/SMAD3/RAD23B/MAP3K7/N4BP1/TRIM32/GGA3/UBXN2B/OTUB1/RNF168/SQSTM1/TOM1/USP5/FAF2/USP16/UEVLD/CKS1B/UBXN1/UBE2N/RNF19B/TSG101/HGS/CXCR4/CKS2/MDM2/TOP2A/BUB3/RBCK1/FAF1/NUP62/UBXN7/USP25/VPS36/NPLOC4/NSFL1C/SPRTN/PLAA/UBE2A/USPL1/VPS28/DDI2/BIRC2/TNFAIP3/UCHL3/DHX16/RAE1/USP33/FBXO7/UBAP1/OTUB2/MVB12B/DNAJB2/UCHL1/UBE2L6/NBR1/WDR48/UBXN10/HSPB1/RNF31/SHARPIN/UBXN8/TOM1L1/NEDD4/SIRT2/RNFT…	71
Transcription Coregulator Binding (GO:0001221)	Transcription Coregulator Binding (GO:0001221)	Transcription Coregulator Binding (GO:0001221)	86/8517	99/12126	8.12e-05	0.0018177	0.00136197	HMGA1/ESR1/MYC/HIF1A/PPARG/RUNX3/SMAD4/ZBTB8A/ZBTB7A/CCNT2/CDK9/HDGF/SMAD3/SMARCA4/ATF7/ZNF644/ZBTB16/THAP7/GATA6/HAND1/LCOR/CTNNB1/HDAC1/EED/PER2/CBX3/MTF2/CHD4/TERT/PPARD/SIX3/PER1/EZH2/ZNF618/ENO1/UBE2I/FOS/HDAC6/MED1/CTCF/CREBBP/CTBP1/EP300/NR5A2/GATA2/RORA/SREBF1/VGLL4/HDAC5/SUZ12/STK36/TRERF1/EHMT1/CHD6/CNOT2/RXRA/HDAC3/RELA/NEK6/ETS1/STAT1/EPAS1/PBX1/RARA/STAT6/THRB/TEAD2/PER3/NR1D1/MED6/C…	86
Protein Kinase Regulator Activity (GO:0019887)	Protein Kinase Regulator Activity (GO:0019887)	Protein Kinase Regulator Activity (GO:0019887)	89/8517	103/12126	9.5e-05	0.00206072	0.00154406	CCNE1/CCND3/CCND1/CDK4/CCND2/CCNA2/GMFB/GPRC5A/CDKN1A/SOCS3/CCNJ/PRKAR1A/PRKAR2A/RPLP1/CCNE2/ELP3/KIDINS220/MOB3C/CDKN1B/SMCR8/SOCS1/CCNF/DNAJC3/ITPRIP/CCNG1/WNK1/PRKRIP1/CDKN1C/NEK9/APC/RPTOR/MAP2K1/AKT1/TRIB1/CCNB1/CCNG2/CDK5R1/SH3BP5/MAPK8IP1/CCNO/CCNI/FAF1/RGCC/CAB39/MOB1A/PARVA/CCNL2/SPRY4/CCNY/MARK2/PRKAG2/DUSP19/CCNH/PDE8A/CSNK2B/YWHAB/GPRC5B/TAOK3/ELP4/DAXX/SNCA/CCNC/MCM2/PRKAG1/CCNA1/MBI…	89
DNA Secondary Structure Binding (GO:0000217)	DNA Secondary Structure Binding (GO:0000217)	DNA Secondary Structure Binding (GO:0000217)	32/8517	33/12126	0.000127611	0.00268369	0.00201083	MSH2/RAD51C/HMGA1/YY1/HMGA2/KMT2A/CLSPN/MEN1/SMC5/HMGB1/MSH6/HMGB2/MEF2C/XRCC2/FANCM/WRN/BLM/ERCC5/HMGB3/MAPT/RAD51D/XPC/RECQL4/RAD51AP1/NEIL3/GEN1/SMC6/RAD51B/RAD18/LIN54/NR0B1/XRCC3	32
GDP Binding (GO:0019003)	GDP Binding (GO:0019003)	GDP Binding (GO:0019003)	60/8517	67/12126	0.000145825	0.00295119	0.00221127	RAB21/RAB9B/RAB5A/RAB5B/RAN/RAB14/RRAGD/KRAS/ARL3/RAP2C/RASEF/RAB12/GNAT1/RAB31/MIEF1/RAB29/TRIM23/RAB27B/RAP1B/RAB10/DYNC1LI1/RAB3B/RAB28/NME2/DIRAS2/RAB27A/GNAI3/HRAS/GEM/RAB2A/RAB5C/RALA/RAP1A/RIT1/RRAS/RAB8B/ARL8B/RAB22A/MRAS/SRP54/RAB35/RIT2/RAB7A/DIRAS3/RAP2A/NRAS/GNAI1/RAB8A/RALB/RRAS2/RRAGC/RHEBL1/DIRAS1/RAB9A/RAP2B/RAB11B/RAB4A/RAB18/RASL12/GBP1	60
GTP Binding (GO:0005525)	GTP Binding (GO:0005525)	GTP Binding (GO:0005525)	164/8517	201/12126	0.000148835	0.00295119	0.00221127	RAB21/RHOT1/DNM2/RAB5A/RAN/RAB14/RRAGD/TUBA1A/KRAS/RAB1B/ARL2/ARL3/EEF1A1/EIF2B2/BMS1/TUBB4B/GTPBP4/RHOF/LSG1/TSR1/RAP2C/ATL2/TUBA1C/RASEF/RHOV/GNAT1/TUBB2A/TUBB3/PIP4K2B/TUBA1B/RAB31/GNL1/RAB29/RHOB/TRIM23/ARF6/RND3/RAB27B/RAP1B/TGM2/RAB10/RAB38/DYNC1LI1/RRAD/RAB28/GNA14/NOA1/DIRAS2/RAB13/RAB27A/ARF4/ARF3/TUBB6/CDC42/RHOA/RHOC/HRAS/ARL1/GEM/GNAQ/RAB2A/RAB6A/RAC1/RAC2/RALA/RAP1A/RIT1/RRAS/ARHGEF5…	164
Single-Stranded DNA Binding (GO:0003697)	Single-Stranded DNA Binding (GO:0003697)	Single-Stranded DNA Binding (GO:0003697)	83/8517	96/12126	0.000156426	0.00301554	0.00225948	MSH2/NABP1/HSPD1/RNF138/RBMS1/HNRNPA1/PURA/RAD23B/FUBP1/LONP1/WBP11/NUCKS1/DHX36/MMS22L/MLH1/RPA2/SAMHD1/RPA1/REXO4/MCM7/PURB/RAD51/HNRNPU/ERCC1/SMC5/CTC1/RTF1/MCM3/HMGB1/CRY2/ERCC4/HMGB2/MCM6/MSH3/POLA1/TOP1/FUBP3/SUB1/PARK7/FAM111A/SPRTN/MCM8/DHX9/HMCES/TDP1/BRCA2/MCM10/BLM/ERCC5/IGHMBP2/MAPT/MCM2/MCM4/MCM5/PCBP1/POLR2G/RAD51D/XPC/RECQL4/RAD51AP1/NEIL3/PCBP2/SMC6/CDC45/STON1/RAD51B/TOP3A/POLR3C…	83
Ubiquitin Conjugating Enzyme Activity (GO:0061631)	Ubiquitin Conjugating Enzyme Activity (GO:0061631)	Ubiquitin Conjugating Enzyme Activity (GO:0061631)	31/8517	32/12126	0.000176724	0.00331476	0.00248368	UBE2D2/UBE2D3/UBE2Q1/UBE2H/UBE2C/UBE2S/UBE2Z/UBE2Q2/UBE2N/UBE2K/TAF1/UBE2D1/UBE2G1/UBE2J1/UBE2R2/UBE2W/UBE2O/UBE2A/UBE2E2/CDC34/UBE2E1/UBE2L3/UBE2QL1/UBE2G2/UBE2L6/UBE2E3/UBE2T/UBE2D4/UBE2NL/UBE2B/UBE2J2	31
Actin Binding (GO:0003779)	Actin Binding (GO:0003779)	Actin Binding (GO:0003779)	150/8517	183/12126	0.000182979	0.00334177	0.00250392	NF2/ABL2/DMD/SPTBN2/TPM2/VCL/PDLIM5/MACF1/FSCN2/LIMA1/MYO19/ACTN4/RDX/PDLIM7/TWF1/ABL1/FSCN1/DAG1/LCP1/PAWR/VASH1/GCSAM/MYH9/ALDOA/MYO6/TMSB4X/MEFV/MYOZ3/MYH10/HNRNPU/EZR/ADD1/SYNPO2L/FXYD5/CACNA1A/PTK2/PRKCE/CXCR4/ANG/CALD1/CAPZA1/CAPZB/FLNB/ITGB1/KCNMA1/MAP1B/MSN/PFN2/PRSS8/SPTAN1/SPTBN1/TNNI3/TNNT2/UTRN/PDLIM4/PDLIM1/PHACTR2/MTSS1/FERMT2/CORO1A/SYNE2/SYNE1/COTL1/RUSC1/ANLN/CCDC88A/PARVA/PHACTR…	150
Double-Stranded RNA Binding (GO:0003725)	Double-Stranded RNA Binding (GO:0003725)	Double-Stranded RNA Binding (GO:0003725)	58/8517	65/12126	0.00023996	0.00424247	0.0031788	DICER1/AGO3/MBNL1/ADARB2/HSPD1/VIM/AGO2/ELAVL1/ACTN1/CLTC/SLC3A2/TARBP2/TFRC/TUBB4B/DHX30/DHX36/AGO4/ADAD2/IGF2BP1/TUBA1B/LRRFIP1/DHX33/MTDH/ADAR/AGO1/ZFR2/DGCR8/HNRNPU/PRKRIP1/DHX15/ADARB1/ILF3/MSN/SUPV3L1/STAU2/ZFR/STRBP/DDX60L/RC3H2/DHX9/RFTN1/RC3H1/EIF4A1/HSP90AB1/ILF2/OAS1/OAS2/EIF2AK2/OASL/NLRP1/ZNF346/IFIH1/PRKRA/APTX/OAS3/TLR7/DUS2/MYH4	58
RNA Polymerase II Complex Binding (GO:0000993)	RNA Polymerase II Complex Binding (GO:0000993)	RNA Polymerase II Complex Binding (GO:0000993)	30/8517	31/12126	0.000244523	0.00424247	0.0031788	RPRD2/AGO2/WDR43/RPRD1B/NCOA3/RPRD1A/CDC73/HNRNPU/SUPT4H1/COX7A2L/CTR9/BRD4/ELP2/ZNF326/RECQL5/DHX9/PCF11/WAC/ELP4/PCIF1/GTF2B/ERCC5/ESRRB/UVSSA/PEX2/URI1/SCAF8/CCAR2/ELOF1/SMYD2	30
Guanyl Ribonucleotide Binding (GO:0032561)	Guanyl Ribonucleotide Binding (GO:0032561)	Guanyl Ribonucleotide Binding (GO:0032561)	182/8517	226/12126	0.000265059	0.00448662	0.00336173	RAB21/RAB9B/RHOT1/DNM2/RAB5A/RAB5B/RAN/RAB14/RRAGD/TUBA1A/KRAS/RAB1B/ARL2/ARL3/EEF1A1/EIF2B2/BMS1/TUBB4B/GTPBP4/RHOF/LSG1/TSR1/RAP2C/ATL2/TUBA1C/RASEF/RHOV/RAB12/GNAT1/TUBB2A/SLC19A1/TUBB3/PIP4K2B/TUBA1B/RAB31/GNL1/MIEF1/RAB29/RHOB/TRIM23/ARF6/RND3/RAB27B/RAP1B/TGM2/RAB10/RAB38/DYNC1LI1/RAB3B/RRAD/RAB28/GNA14/NOA1/NME2/PDE11A/DIRAS2/RAB13/RAB27A/ARF4/ARF3/GNAI3/TUBB6/CDC42/RHOA/RHOC/HRAS/ARL1/GEM…	182
Cell-Cell Adhesion Mediator Activity (GO:0098632)	Cell-Cell Adhesion Mediator Activity (GO:0098632)	Cell-Cell Adhesion Mediator Activity (GO:0098632)	40/8517	43/12126	0.000277761	0.00455494	0.00341292	TMOD3/CNN3/PDLIM5/PALLD/RAB10/MYPN/CD200/ANXA2/CD47/KRT18/PPP1CA/PDLIM1/ROBO4/NFASC/NRCAM/BAIAP2/CNTN4/CNTN1/CNTN2/STXBP6/CNTN6/TRIM29/S100A11/PAK4/NTNG1/ESAM/EMB/SIRPA/PLXNB3/JAM3/CNTN5/EPCAM/PKP3/CLSTN3/LRRC4C/CDC42EP1/IGSF9/NEXN/DSCAM/BAIAP2L1	40
Transmembrane Receptor Protein Kinase Activity (GO:0019199)	Transmembrane Receptor Protein Kinase Activity (GO:0019199)	Transmembrane Receptor Protein Kinase Activity (GO:0019199)	35/8517	37/12126	0.000282223	0.00455494	0.00341292	TGFBR2/PDGFRA/MERTK/EGFR/ACVR2A/EPHA2/KDR/ACVR1B/TYRO3/EPHB4/KIT/ERBB2/AXL/ERBB4/DDR1/FLT1/ROR1/ACVRL1/MST1R/TIE1/RYK/NTRK3/EPHA1/FLT3/ROR2/DDR2/RET/ROS1/TEK/FLT4/BMPR1A/MUSK/BMPR1B/ALK/NTRK1	35
Mitogen-Activated Protein Kinase Binding (GO:0051019)	Mitogen-Activated Protein Kinase Binding (GO:0051019)	Mitogen-Activated Protein Kinase Binding (GO:0051019)	23/8517	23/12126	0.000293254	0.00462541	0.00346573	MAPKAPK5/PTPRJ/PPM1D/MAPKAPK2/ATF7/PRMT1/TPR/MAPK14/SIRT1/MAPK7/GCH1/ACE/DUSP1/MAPKAPK3/MICAL2/DUSP10/DUSP16/DIRAS1/NBR1/NFATC1/PRKG2/CDK5RAP3/TNIP1	23
Protein Kinase Activator Activity (GO:0030295)	Protein Kinase Activator Activity (GO:0030295)	Protein Kinase Activator Activity (GO:0030295)	76/8517	88/12126	0.000320284	0.0049395	0.00370106	MAP3K12/CALM2/GPRC5A/TAOK1/CDKN1A/EGFR/DDX3X/PAK2/RPLP1/UXT/STRADB/RICTOR/MOB3C/CALM1/CALM3/TAB2/DBF4/WNK1/STK4/CD40LG/MAP2K2/NEK9/CD24/IQGAP1/TRAF6/RPTOR/MAP2K1/AKT1/GRM5/NRG1/IGF2/IL6ST/STK3/CDK5R1/SPRY2/RGCC/CAB39/MOB1A/CAB39L/ALS2/ERCC6/MARK2/PRKAG2/DUSP19/LTF/MLST8/KAT5/PDE8A/GPRC5B/DAXX/ERBB3/PARP16/CD36/GAS6/TAOK2/GPRC5C/MOB3B/DBF4B/MOB1B/DAB2IP/ETFA/STRADA/AGAP2/MAP3K13/FAM20A/WNT11/MT3/P…	76
Transcription Regulatory Region Nucleic Acid Binding (GO:0001067)	Transcription Regulatory Region Nucleic Acid Binding (GO:0001067)	Transcription Regulatory Region Nucleic Acid Binding (GO:0001067)	180/8517	224/12126	0.000354435	0.00534734	0.00400665	WT1/JUN/SOX4/SOX5/PPARG/KLF4/STAT3/IRF1/SMAD4/THRA/TNF/YY1/ZBTB8A/TCF7L2/ATMIN/HMGA2/TFAP4/BRCA1/TBP/TP53/YAP1/NFKB1/CHD3/GABPA/SMAD3/TFAP2A/KMT2D/ATF7/CREB3L2/TBL1XR1/DHX36/FOXK1/SOX6/MAFK/CARM1/HNRNPL/TAF9/GATA6/HAND1/ARID5B/FOXA1/PER2/BAHD1/SOX12/FOXO3/ATF6B/HNF4A/SOX11/CTCFL/ATF3/KCNH2/SUV39H1/MEN1/NFYB/PER1/BRD7/RUNX1/HMGB1/REST/HDAC4/FOS/ERBB4/CTCF/ZBTB20/ATF4/CRY2/DDIT3/EGR1/ETV5/FOXC1/NR5…	180
Transcription Corepressor Binding (GO:0001222)	Transcription Corepressor Binding (GO:0001222)	Transcription Corepressor Binding (GO:0001222)	39/8517	42/12126	0.00036994	0.00546251	0.00409295	ESR1/RUNX3/ZBTB7A/HDGF/ZNF644/ZBTB16/THAP7/LCOR/CTNNB1/HDAC1/EED/PER2/MTF2/SIX3/PER1/EZH2/ENO1/HDAC6/CTBP1/RORA/HDAC5/SUZ12/STK36/EHMT1/CNOT2/HDAC3/NEK6/ETS1/STAT1/PBX1/PER3/NR1D1/EHMT2/FAM89B/LEF1/WIZ/PHF1/USP11/CTBP2	39
Tubulin Binding (GO:0015631)	Tubulin Binding (GO:0015631)	Tubulin Binding (GO:0015631)	253/8517	322/12126	0.000412661	0.00591201	0.00442975	TPPP3/CENPJ/S100A9/GJA1/DNM2/JMY/PRNP/CLIP1/MAPRE3/SUN2/RACGAP1/TAOK1/KIF13A/WASL/KIF2A/EML4/KIF23/BRCA1/PLK1/BIRC5/ARL3/DDX3X/FNTA/HTT/KIF5A/KIF5B/MAP4/PAFAH1B1/PEX14/CLIP2/ZNF207/UXT/GPAA1/CKAP5/KIF14/LRPPRC/TUBGCP2/KIF2C/CHP1/GABARAP/TTLL5/KIF1B/TTLL12/CLASP1/GABARAPL1/RMDN1/IFT74/DIXDC1/CAMSAP1/CCDC88C/POLB/KIF3B/NISCH/RPS3/SMC3/HAUS6/KIF27/MTUS1/REEP2/KIF18B/RCC2/STMN1/DAG1/VAPA/GABARAPL2/ND…	253
Single-Stranded DNA Helicase Activity (GO:0017116)	Single-Stranded DNA Helicase Activity (GO:0017116)	Single-Stranded DNA Helicase Activity (GO:0017116)	22/8517	22/12126	0.000417839	0.00591201	0.00442975	RFC2/MCM7/RAD51/MCM3/MCM6/POLQ/PIF1/MCM8/DHX9/WRNIP1/MCM2/MCM4/MCM5/RFC3/RFC5/CHTF8/DNA2/HELB/RFC4/DSCC1/MCM9/HELQ	22
Transition Metal Ion Binding (GO:0046914)	Transition Metal Ion Binding (GO:0046914)	Transition Metal Ion Binding (GO:0046914)	352/8517	456/12126	0.000430937	0.00591201	0.00442975	WT1/PRIM1/BMI1/S100A9/PPARG/KLF4/PARP1/SLC31A1/PRNP/CLIP1/ZFPM2/RNF11/RNF125/ENPP5/CDADC1/RAG1/PTGR2/GALNT4/XPNPEP3/LITAF/B4GALT1/PIM1/TP53/GALNT1/ABL2/ANPEP/ARG2/ATOX1/CALR/CHD3/CYLD/FTH1/FTL/GALNT3/SMAD3/KMT2A/SLC11A2/RABGGTB/RPS27/SKI/ZFPL1/PDXK/BAZ1B/LANCL1/SEC24B/SEC24A/KDM2A/TES/TIMM13/EXD2/IKZF4/TET3/COA6/PEX12/PHEX/ZNF91/ARIH1/SLFN13/PRIMPOL/PCK2/CHORDC1/DYRK2/MYCBP2/TAB2/ABL1/ARG1/FDX1/I…	352
Protein Heterodimerization Activity (GO:0046982)	Protein Heterodimerization Activity (GO:0046982)	Protein Heterodimerization Activity (GO:0046982)	154/8517	190/12126	0.000434456	0.00591201	0.00442975	BCL2/MCL1/IKBKB/HIF1A/PAFAH1B2/RAN/FXR1/RRAGD/ABCG8/KCNB1/TP53/CHUK/EXT1/IRAK2/PAFAH1B1/PPP2R1A/SUPT5H/TCF3/TPM2/YWHAH/BHLHE40/IRAK3/RALGAPB/MICU2/LSM5/IL12B/FZD9/FXR2/ATP1A1/NR4A1/SMC3/PIK3R2/BAX/BCL2L1/NEUROD1/SDCBP/VAPA/PHB2/SAE1/YWHAE/ATP1A2/SNX1/TCOF1/UBA2/PPP2CA/ATF3/TFAP2B/ADD1/SMC1A/ERBB2/AHR/ZHX1/BCL2L2/XBP1/FMR1/ADRA2A/ATF4/ATP1B1/BMP6/GADD45A/DDIT3/EXT2/GTF2A1/IL12A/ITGB1/MEF2A/MEF2C/P…	154
Translation Initiation Factor Activity (GO:0003743)	Translation Initiation Factor Activity (GO:0003743)	Translation Initiation Factor Activity (GO:0003743)	38/8517	41/12126	0.000491926	0.00656531	0.00491925	EIF1AX/EIF4E/EIF4G1/EIF5/EIF3E/EIF3C/EIF3F/EIF3H/EIF4G3/EIF2B2/EIF2B5/EIF5B/EIF1/EIF3M/COPS5/EIF3K/EIF2S3/EIF2B4/EIF2B1/EIF4G2/EIF2S1/EIF4A2/EIF3I/EIF3J/EIF4E2/EIF3L/EIF3D/EIF4A1/EIF3B/EIF2B3/EIF2S2/EIF1AY/EIF6/EIF4E3/MTIF2/EIF3G/EIF1B/EIF2D	38
Histone Deacetylase Binding (GO:0042826)	Histone Deacetylase Binding (GO:0042826)	Histone Deacetylase Binding (GO:0042826)	84/8517	99/12126	0.000563829	0.00738297	0.0055319	HSPA1A/CCND1/SATB2/HOXA10/NACC2/TFAP4/TP53/HSPA1B/HSP90AA1/KPNA2/UBE2V1/NCOR2/DHX36/THAP7/RAD9A/BRMS1L/LCOR/KCTD21/HDAC1/MAPK8/MIER3/ANKRA2/YWHAE/CHD4/SUDS3/NACC1/MTA3/HES1/TRAF6/HDAC4/HDAC6/MEF2D/MEF2A/MEF2C/PKN1/PKN2/KAT2B/MTA2/HDAC5/NUDT21/HEY2/NIPBL/GMNN/DACT1/BCOR/BEX4/MIER1/BHLHE41/PHF6/RBBP4/CAMTA2/NCOR1/HDAC9/SP2/YWHAB/HDAC3/USF1/MIER2/SFPQ/RELA/MTA1/SMG5/KAT2A/HDAC2/HIC1/HSP90AB1/MAGEA11…	84
Ephrin Receptor Binding (GO:0046875)	Ephrin Receptor Binding (GO:0046875)	Ephrin Receptor Binding (GO:0046875)	21/8517	21/12126	0.000595332	0.00765112	0.00573283	CRK/EFNB2/GRB2/EFNA3/SHC1/EFNA5/EFNA2/FYN/PTPN1/SRC/ANKS1A/EFNB1/EFNA1/EFNA4/PIK3CG/ANKS1B/LYN/NCK1/EFNB3/CBL/CHN1	21
RNA Endonuclease Activity, Producing 5'-Phosphomonoesters (GO:0016891)	RNA Endonuclease Activity, Producing 5'-Phosphomonoesters (GO:0016891)	RNA Endonuclease Activity, Producing 5'-Phosphomonoesters (GO:0016891)	27/8517	28/12126	0.000643962	0.00812563	0.00608837	DICER1/AGO3/POP7/ELAC2/RPP40/RPP14/DROSHA/RPP25/MRPL44/NUDT12/NUDT16/APEX1/FEN1/EXO1/RPP38/POP5/RNASEH1/RPP30/ENDOV/ELAC1/POP4/POP1/NUDT16L1/RNASEH2A/DBR1/RPP21/PLD6	27
Damaged DNA Binding (GO:0003684)	Damaged DNA Binding (GO:0003684)	Damaged DNA Binding (GO:0003684)	41/8517	45/12126	0.000744835	0.00923063	0.00691633	PARP1/NTHL1/UNG/RPS3/PCNA/RPA2/RPA1/ERCC1/OGG1/HMGB1/CREBBP/CRY2/EP300/ERCC4/HMGB2/NBN/POLQ/DCLRE1B/SDE2/TDG/FEN1/DDB1/ERCC3/ERCC5/FANCG/POLD1/RBBP8/XPC/XRCC1/CUL4B/NEIL3/AUNIP/PARP2/ERCC2/SMC6/APTX/DCLRE1A/RAD18/DDB2/DCLRE1C/RPA3	41
Protein Serine/Threonine Phosphatase Activity (GO:0004722)	Protein Serine/Threonine Phosphatase Activity (GO:0004722)	Protein Serine/Threonine Phosphatase Activity (GO:0004722)	49/8517	55/12126	0.000815002	0.009923	0.0074351	CDC14B/TIMM50/PTEN/PPM1A/PPP6C/PPM1D/MTMR3/MTMR4/CTDSPL/PHLPP2/SSU72/PPP3CA/PPP1CC/PPP3R1/PPTC7/PPP3CB/PPP2CA/PPP1R3D/CTDSP1/MTMR6/PPM1G/PPP1CA/PPP1CB/PPP2CB/PPP5C/CDC14A/CTDP1/PPM1E/CTDNEP1/CTDSPL2/PPM1L/DUSP4/PPEF2/PPM1K/CTDSP2/CDKN3/DUSP1/PPP1R3C/PPP4C/PPM1F/PHLPP1/PDP1/MTMR14/UBLCP1/PPM1B/PGAM5/RPAP2/PPP3CC/MYH3	49
Tau Protein Binding (GO:0048156)	Tau Protein Binding (GO:0048156)	Tau Protein Binding (GO:0048156)	36/8517	39/12126	0.000865441	0.0103555	0.00775913	PRKAA1/TAOK1/CLU/GSK3B/HSP90AA1/ROCK2/PICALM/STUB1/PPP2CA/DYRK1A/PIN1/HDAC6/SMAD2/EP300/FYN/MAP2/PPP2CB/PPP5C/LGMN/ROCK1/BAG2/MARK2/MARK3/DCTN1/BRSK1/TTBK2/SNCA/MARK1/BIN1/CDK5/HSP90AB1/MAP1A/TAOK2/GSK3A/MARK4/BRSK2	36
Nuclear Thyroid Hormone Receptor Binding (GO:0046966)	Nuclear Thyroid Hormone Receptor Binding (GO:0046966)	Nuclear Thyroid Hormone Receptor Binding (GO:0046966)	26/8517	27/12126	0.000887371	0.0104379	0.0078209	GTF2H1/MED13/THRAP3/MED12/NCOA3/TRIP12/MED16/GAS2L1/MED1/TACC1/TRIP6/MED4/NCOR1/HMGN3/MED17/NSD1/GTF2B/TAF7/OASL/BRD8/NCOA6/PRMT2/JMJD1C/MED22/TAF11/MED30	26
RNA Polymerase Core Enzyme Binding (GO:0043175)	RNA Polymerase Core Enzyme Binding (GO:0043175)	RNA Polymerase Core Enzyme Binding (GO:0043175)	31/8517	33/12126	0.000937978	0.0108493	0.00812914	RPRD2/AGO2/WDR43/RPRD1B/NCOA3/RPRD1A/CDC73/HNRNPU/ERBB2/SUPT4H1/CTR9/ELP2/SPTY2D1/ZNF326/RECQL5/DHX9/PCF11/WAC/ELP4/GTF2B/ERCC5/ESRRB/RRN3/UVSSA/PEX2/URI1/SCAF8/CCAR2/MAF1/ELOF1/SMYD2	31
ATPase Binding (GO:0051117)	ATPase Binding (GO:0051117)	ATPase Binding (GO:0051117)	63/8517	73/12126	0.00109081	0.0124102	0.00929873	ESR1/EGFR/ATP6V1E1/DNAJB1/PDE4D/PTPN3/NCSTN/DNAJC10/TAF9/RDX/SYVN1/PPP3CA/GABARAPL2/DERL1/CLPP/ATXN3/NKD2/UBXN1/ANK1/EZR/CAV1/ANK2/ATP1B1/ATP1B3/ATP6V0A1/PKD2/PSEN1/RALA/SNTA1/SRC/USP25/SNX10/ZNHIT6/TMTC4/SLC2A13/SVIP/PEX26/PEX19/PLN/ATP6V0A2/NOP58/ATP6V0A4/FBL/TCIRG1/VCPKMT/BBC3/ALDOB/RALB/S100A1/TRPC1/NR1H2/WFS1/TOR1AIP1/TMEM106B/PIH1D1/TOR1AIP2/METTL21A/AKR1B1/PGR/ATP6V1G1/BRSK2/ATP1B2/CHMP4A	63
Phosphotransferase Activity, Alcohol Group As Acceptor (GO:0016773)	Phosphotransferase Activity, Alcohol Group As Acceptor (GO:0016773)	Phosphotransferase Activity, Alcohol Group As Acceptor (GO:0016773)	66/8517	77/12126	0.00124269	0.0139101	0.0104226	IPMK/PDXK/NT5C3A/RFK/ETNK1/AGK/IPPK/PANK1/HK1/PKM/ADPGK/IP6K3/NOL9/GNE/DGKH/IP6K1/PAPSS2/MVK/PIK3C3/UCK2/DGKD/SPHK1/DGKI/FAM20B/NT5C2/NMRK1/PANK3/PGM2L1/GALK2/DGKG/NADK2/NADK/CHKA/ITPKB/DGKE/DGKB/PANK4/POMK/DGKA/GALK1/HK2/DGKZ/DOLK/SHPK/IP6K2/FGGY/DCAKD/COASY/GLYCTK/FAM20A/XYLB/HEXIM1/RBKS/PANK2/UPRT/CHKB/DCK/ITPKA/PAPSS1/ETNK2/SPHK2/ITPKC/TRPT1/TKFC/UCK1/DGKQ	66
Syntaxin Binding (GO:0019905)	Syntaxin Binding (GO:0019905)	Syntaxin Binding (GO:0019905)	47/8517	53/12126	0.00132978	0.0146487	0.010976	DAPK1/STX16/STX6/STXBP3/VAMP8/NAPG/NSF/VAMP3/ABL1/STX7/TMED10/PRRT2/SYT2/UNC13A/CACNA1A/STX10/SYT1/SNPH/UNC13B/TMED9/VPS18/LRRK2/STXBP5/UNC13C/VAMP2/STXBP1/NAPA/STXBP5L/STXBP2/SYT5/RAB11A/SNAP29/BLOC1S6/VPS54/BAIAP3/SYT13/GOLGA2/STX8/VAMP1/SCFD1/SNAP47/SYT17/STXBP4/PTPN2/VPS11/VPS52/SNAP23	47
Ribosome Binding (GO:0043022)	Ribosome Binding (GO:0043022)	Ribosome Binding (GO:0043022)	72/8517	85/12126	0.00153471	0.0166421	0.0124696	TMCO1/SERBP1/IFRD2/PIM1/DDX3X/EEF2/RPSA/SRP19/SRP68/SRP72/UNG/BAG6/NAA10/EIF3C/NEMF/EIF1/CPEB3/LARP1/GEMIN5/DNAJC2/SEC61A1/NMD3/PELO/PTCD3/SEC61A2/NAA15/MRRF/MALSU1/CPEB2/CCDC47/G3BP1/DHX33/CPEB4/LTN1/USP16/SEC61G/FMR1/EIF2S1/OXA1L/TMEM147/SEC61B/CPSF6/MRPS27/SBDS/GUF1/CPEB1/DHX9/ETF1/DHX29/NCLN/YTHDF3/EFNA1/IGHMBP2/RBM3/NAA16/ERI1/EIF6/NOMO3/NPM1/TMEM223/NOMO1/YTHDF1/TTC5/MTIF2/GTPBP6/NOMO2/C1QB…	72
Promoter-Specific Chromatin Binding (GO:1990841)	Promoter-Specific Chromatin Binding (GO:1990841)	Promoter-Specific Chromatin Binding (GO:1990841)	38/8517	42/12126	0.00165079	0.0175699	0.0131648	BMI1/KLF4/TP53/NUP98/WDR13/POLR2A/ZNF609/PRDM1/DNMT1/TRIM28/E2F4/HNRNPU/EZH2/SETDB1/DDX5/ATF4/EGR1/FOXC1/NIPBL/DHX9/GTF2F1/PCGF2/GTF2B/RBL1/STAT1/GLI2/RBL2/EHMT2/KDM1A/ZC3H4/TAF10/IKZF3/ZNF304/FOXC2/ISL1/PRDM15/PCGF1/POU4F2	38
Phosphoric Ester Hydrolase Activity (GO:0042578)	Phosphoric Ester Hydrolase Activity (GO:0042578)	Phosphoric Ester Hydrolase Activity (GO:0042578)	46/8517	52/12126	0.00169339	0.0175699	0.0131648	HDHD2/DUSP18/PXYLP1/PTPRJ/SACM1L/PLCXD2/SBF1/PPP1CC/SAMHD1/ATP1A2/GDPD1/PTPRO/DUSP3/DUSP8/PPP1CA/PPP1CB/PPP5C/PTPRM/SMPDL3A/FRA10AC1/DUSP28/APEX1/DUSP4/ENPP1/APEX2/DUSP5/DUSP10/DUSP12/LHPP/DUSP16/ENPP6/PLCXD3/PGAM5/EPHX2/GDPD3/MPPED2/PLCXD1/SMPD3/PHOSPHO2/PHOSPHO1/DUSP11/ARMT1/NANP/ENPP7/DUSP23/SMPDL3B	46
5'-3' RNA Polymerase Activity (GO:0034062)	5'-3' RNA Polymerase Activity (GO:0034062)	5'-3' RNA Polymerase Activity (GO:0034062)	18/8517	18/12126	0.00172155	0.0175699	0.0131648	POLR2E/POLR1C/POLR3A/POLR2A/TERT/POLR3G/MED20/POLR1A/MED21/POLR2J/POLR2L/POLRMT/TRNT1/POLR3F/POLR3C/POLR3K/POLR2I/POLR3H	18
TBP-class Protein Binding (GO:0017025)	TBP-class Protein Binding (GO:0017025)	TBP-class Protein Binding (GO:0017025)	18/8517	18/12126	0.00172155	0.0175699	0.0131648	ESR1/THRA/TAF13/RUVBL1/ZFP36L2/DR1/GTF2A1/HHEX/TAF1/DRAP1/TAF1B/GTF2B/TAF12/YEATS2/RUVBL2/GTF2A2/TAF11/TAF1L	18
RNA Exonuclease Activity, Producing 5'-Phosphomonoesters (GO:0016896)	RNA Exonuclease Activity, Producing 5'-Phosphomonoesters (GO:0016896)	RNA Exonuclease Activity, Producing 5'-Phosphomonoesters (GO:0016896)	28/8517	30/12126	0.00226971	0.0228287	0.0171051	CNOT7/EXD2/EXOSC10/CPSF3/DIS3L/XRN2/EXOSC2/XRN1/PNPT1/ANGEL2/DCP2/PDE12/DIS3L2/ISG20/POLRMT/CNOT8/DIS3/USB1/ERI1/TOE1/EXOSC3/EXOSC9/PAN2/REXO2/EXOSC4/ERI2/EXOSC7/ERI3	28
mRNA 5'-UTR Binding (GO:0048027)	mRNA 5'-UTR Binding (GO:0048027)	mRNA 5'-UTR Binding (GO:0048027)	23/8517	24/12126	0.0023045	0.0228475	0.0171191	DDX3X/RPL5/LARP1/RSL1D1/UTP23/DHX36/RPS3A/IGF2BP1/IGF2BP3/NCL/MYH10/RPS7/FMR1/SHMT2/SYNCRIP/LARP6/SHMT1/GNL3/RPL41/RPS14/IGF2BP2/MRPS11/RPL26	23
Cadherin Binding Involved In Cell-Cell Adhesion (GO:0098641)	Cadherin Binding Involved In Cell-Cell Adhesion (GO:0098641)	Cadherin Binding Involved In Cell-Cell Adhesion (GO:0098641)	17/8517	17/12126	0.00245249	0.0239723	0.0179619	TMOD3/CNN3/PDLIM5/RAB10/ANXA2/KRT18/PPP1CA/PDLIM1/BAIAP2/STXBP6/TRIM29/S100A11/PAK4/EPCAM/PKP3/CDC42EP1/BAIAP2L1	17
DNA-binding Transcription Activator Activity, RNA Polymerase II-specific (GO:0001228)	DNA-binding Transcription Activator Activity, RNA Polymerase II-specific (GO:0001228)	DNA-binding Transcription Activator Activity, RNA Polymerase II-specific (GO:0001228)	268/8517	348/12126	0.00253781	0.0244616	0.0183286	MEOX2/HOXA5/WT1/JUN/HOXD8/HOXA7/NFIB/ESR1/PPARA/SOX4/MYC/HIF1A/NFE2L1/KLF4/SATB2/STAT3/KLF6/HOXA10/HOXB1/HOXB3/IRF1/SMAD4/YY1/ZNF107/ZNF224/RFXAP/ZNF24/ATMIN/MYCN/E2F3/PLAG1/NFIC/NR1I2/LITAF/TFAP4/MYB/TP53/NFKB1/CDC5L/GABPA/HOXD13/RBPJ/IRF4/SMAD3/REL/TCF3/TFAP2A/NR2C2/ONECUT2/ZNF267/PRDM4/CREBRF/ZNF384/ZNF585B/ZBTB16/ELK4/ZNF91/MLXIP/HOXB7/FOXO1/FOXJ3/NR4A1/RFX5/HAND1/ZNF850/ATF1/ERG/FOXA1/MYBL2/…	268
Protein Tyrosine Kinase Activity (GO:0004713)	Protein Tyrosine Kinase Activity (GO:0004713)	Protein Tyrosine Kinase Activity (GO:0004713)	82/8517	99/12126	0.0029156	0.0277182	0.0207686	FGFR1/MET/PDGFRA/RPS6KA5/MERTK/EGFR/JAK2/ABL2/EPHA2/IGF1R/KDR/WEE1/BAZ1B/CAMKK2/TNK1/EPHA7/DYRK2/TWF1/ABL1/JAK1/HIPK3/BCR/TYRO3/DYRK1A/TNK2/EPHB4/TXK/HIPK1/KIT/ERBB2/AXL/PTK2/ERBB4/DDR1/CLK1/CSK/EPHA4/PTK2B/FGFR2/FLT1/FRK/FYN/ROR1/PDGFRB/SRC/TYK2/YES1/HIPK2/PEAK1/MST1R/TTN/TIE1/FER/ERBB3/RYK/NTRK3/EPHA1/FES/FLT3/INSR/MATK/ROR2/DDR2/RET/ROS1/TEK/RIPK2/MELK/CLK4/CSF1R/LYN/SYK/FLT4/EPHB2/PKDCC/FGFR3…	82
SH3 Domain Binding (GO:0017124)	SH3 Domain Binding (GO:0017124)	SH3 Domain Binding (GO:0017124)	51/8517	59/12126	0.00303545	0.0281045	0.0210581	WIPF1/DNM2/CRK/GRB2/LANCL1/CD2AP/RAD9A/RUFY2/ENAH/ADAM9/ABL1/PLSCR1/DPYSL3/WASF2/SH3BP2/MYPN/ABI2/ADAM12/CNTNAP1/SHANK1/GPX1/ELMO1/RUFY1/ZNF106/SGIP1/CBLB/SOCS7/PTPN12/DRD4/MAPT/VASP/ADAM15/CBLC/AFAP1/MICAL1/AFAP1L1/DAB2IP/ARHGAP27/WAS/CD3E/REPS1/CBL/KHDRBS1/CABYR/SHANK3/AKAP5/AFAP1L2/CRB3/CYBA/EVL/ESPN	51
Acetylation-Dependent Protein Binding (GO:0140033)	Acetylation-Dependent Protein Binding (GO:0140033)	Acetylation-Dependent Protein Binding (GO:0140033)	22/8517	23/12126	0.00315872	0.0281045	0.0210581	ZZZ3/KMT2A/MLLT1/SMARCA4/PSME4/PHIP/BAZ2A/ZZEF1/CARM1/THAP7/ZMYND8/BRD7/BRDT/DPF2/TAF1/BRD4/BRD2/MLLT3/BRD3/TRIM24/YEATS4/TAF1L	22
Lysine-Acetylated Histone Binding (GO:0070577)	Lysine-Acetylated Histone Binding (GO:0070577)	Lysine-Acetylated Histone Binding (GO:0070577)	22/8517	23/12126	0.00315872	0.0281045	0.0210581	ZZZ3/KMT2A/MLLT1/SMARCA4/PSME4/PHIP/BAZ2A/ZZEF1/CARM1/THAP7/ZMYND8/BRD7/BRDT/DPF2/TAF1/BRD4/BRD2/MLLT3/BRD3/TRIM24/YEATS4/TAF1L	22
mRNA 3'-UTR AU-rich Region Binding (GO:0035925)	mRNA 3'-UTR AU-rich Region Binding (GO:0035925)	mRNA 3'-UTR AU-rich Region Binding (GO:0035925)	22/8517	23/12126	0.00315872	0.0281045	0.0210581	FXR1/ELAVL1/CPEB3/RBMS3/CPEB2/DHX36/ZFP36L1/CPSF1/ZFP36/ELAVL3/ZFP36L2/ILF3/HNRNPA0/NUDT21/RBM24/CPEB1/MEX3D/KHSRP/EXOSC9/EXOSC4/ZC3H12A/EXOSC8	22
Phospholipase C Activity (GO:0004629)	Phospholipase C Activity (GO:0004629)	Phospholipase C Activity (GO:0004629)	22/8517	23/12126	0.00315872	0.0281045	0.0210581	PLCB3/PDIA3/CCL5/PLCH2/PLCE1/NOTUM/PLCL1/CASR/CHRM1/CHRM3/EDNRA/PLCB2/PLCB4/PLCG1/PLCG2/CCR5/PLCH1/CHRM5/PLCB1/PLCD1/F2RL2/CCR1	22
Myosin Binding (GO:0017022)	Myosin Binding (GO:0017022)	Myosin Binding (GO:0017022)	47/8517	54/12126	0.00326145	0.0285697	0.0214067	RAB14/DMD/TRAK1/TRIM32/LLGL1/TOM1/ACTC1/RAB27B/RAB10/GCSAM/RAB3B/NKD2/SPATA6/PYCARD/RHOA/CXCR4/RAB6B/CALD1/LLGL2/RAB6A/RALA/ARFGEF1/CORO1A/LMTK2/RAB3C/RAB39B/STXBP5/APEX1/GIPC1/STXBP5L/LARP6/MYRIP/RAB8A/RAB3A/RAB11A/RAB3D/MLPH/SHROOM1/RAB11B/TRAK2/GSN/TRIOBP/NPC1L1/MYBPC1/RAB25/MYBPC3/MYL2	47
Ubiquitin-Like Protein Ligase Activity (GO:0061659)	Ubiquitin-Like Protein Ligase Activity (GO:0061659)	Ubiquitin-Like Protein Ligase Activity (GO:0061659)	246/8517	319/12126	0.00329334	0.0285697	0.0214067	HACE1/HERC6/RNF149/XIAP/TRIM37/UBE2D2/UBE2D3/CUL3/DTX4/RNF11/MYLIP/RNF125/TRIM4/RAG1/RLIM/RNF138/PPP1R11/CUL4A/CBX4/UBE3C/UBE2C/TRIM32/TRIM44/RNF111/MIB1/SMURF2/ZNRF3/UBR3/RNF38/RNF217/LONRF2/ZNRF2/RNF144B/NHLRC3/PEX12/SMURF1/ARIH1/RBBP6/BSPRY/ZNRF1/TRIM35/BFAR/NEURL4/BRAP/HUWE1/MYCBP2/SYVN1/TRIM23/TRIP12/STUB1/TRAF3IP2/NEDD4L/HECTD1/UHRF2/FANCL/MSL2/MKRN3/TRIM28/PRPF19/RNF220/RNF122/LTN1/RNF135/…	246
Four-Way Junction DNA Binding (GO:0000400)	Four-Way Junction DNA Binding (GO:0000400)	Four-Way Junction DNA Binding (GO:0000400)	16/8517	16/12126	0.00349367	0.0287557	0.0215461	MSH2/RAD51C/YY1/MEN1/HMGB1/MSH6/HMGB2/XRCC2/FANCM/WRN/BLM/HMGB3/RAD51D/GEN1/RAD51B/XRCC3	16
Transmembrane Receptor Protein Phosphatase Activity (GO:0019198)	Transmembrane Receptor Protein Phosphatase Activity (GO:0019198)	Transmembrane Receptor Protein Phosphatase Activity (GO:0019198)	16/8517	16/12126	0.00349367	0.0287557	0.0215461	PTPRG/PTPRD/PTPRT/PTPRK/PTPRF/PTPRN2/PTPRO/PTPRA/PTPRB/PTPRE/PTPRM/PTPRZ1/PTPRU/PTPRR/PTPRH/PTPRC	16
Transmembrane Receptor Protein Tyrosine Phosphatase Activity (GO:0005001)	Transmembrane Receptor Protein Tyrosine Phosphatase Activity (GO:0005001)	Transmembrane Receptor Protein Tyrosine Phosphatase Activity (GO:0005001)	16/8517	16/12126	0.00349367	0.0287557	0.0215461	PTPRG/PTPRD/PTPRT/PTPRK/PTPRF/PTPRN2/PTPRO/PTPRA/PTPRB/PTPRE/PTPRM/PTPRZ1/PTPRU/PTPRR/PTPRH/PTPRC	16
Wnt Receptor Activity (GO:0042813)	Wnt Receptor Activity (GO:0042813)	Wnt Receptor Activity (GO:0042813)	16/8517	16/12126	0.00349367	0.0287557	0.0215461	FZD6/FZD9/TSPAN12/LRP6/LRP5/ROR1/FZD5/FZD3/FZD4/FZD10/FZD2/RYK/FZD7/FZD8/PKD1/NID1	16
Zinc Ion Binding (GO:0008270)	Zinc Ion Binding (GO:0008270)	Zinc Ion Binding (GO:0008270)	262/8517	341/12126	0.00352196	0.0287557	0.0215461	WT1/PRIM1/BMI1/S100A9/PPARG/KLF4/PARP1/CLIP1/ZFPM2/RNF11/RNF125/ENPP5/CDADC1/RAG1/PTGR2/LITAF/TP53/ANPEP/CALR/CHD3/CYLD/SMAD3/KMT2A/RABGGTB/RPS27/SKI/ZFPL1/PDXK/BAZ1B/LANCL1/SEC24B/SEC24A/KDM2A/TES/TIMM13/IKZF4/TET3/PEX12/PHEX/ZNF91/ARIH1/SLFN13/PRIMPOL/CHORDC1/MYCBP2/TAB2/NT5E/PGGT1B/PLSCR1/SEC23A/SAMHD1/TIMM10/TIMM9/TET1/ZDHHC20/TAB3/TRIM28/ZMYND8/USP16/CHD4/GALT/SOD1/ZNF208/MSRB3/MEFV/TADA2A/G…	262
Phosphoric Diester Hydrolase Activity (GO:0008081)	Phosphoric Diester Hydrolase Activity (GO:0008081)	Phosphoric Diester Hydrolase Activity (GO:0008081)	39/8517	44/12126	0.00357469	0.0288469	0.0216144	PLD3/PLCXD2/SMPD4/PLCB3/GDE1/PDE11A/GDPD1/PDIA3/SMPDL3A/PLCE1/NOTUM/SMPD1/ENPP2/PLD2/ENPP1/PLCL1/GPCPD1/GDPD5/APEX2/PLCB2/PLCB4/PLCG1/PLCG2/PLD1/MPPE1/ENPP6/FAM83B/PLCXD3/NAPEPLD/PLCB1/TDP2/GDPD3/MPPED2/PLCXD1/SMPD3/ENPP7/SMPDL3B/GPLD1/PLD6	39
Frizzled Binding (GO:0005109)	Frizzled Binding (GO:0005109)	Frizzled Binding (GO:0005109)	30/8517	33/12126	0.00449686	0.0350654	0.0262738	WNT3A/WNT10A/WNT5A/ZNRF3/CCDC88C/WNT4/SDCBP/DVL3/WNT9B/SFRP1/WNT10B/LRP6/NDP/FZD1/WNT16/DVL1/RYK/WNT1/WNT6/WNT7B/WNT9A/FZD7/RNF43/WNT5B/WNT2B/WNT7A/WNT11/WNT3/WNT2/DVL2	30
Telomeric DNA Binding (GO:0042162)	Telomeric DNA Binding (GO:0042162)	Telomeric DNA Binding (GO:0042162)	30/8517	33/12126	0.00449686	0.0350654	0.0262738	TERF2/HNRNPA2B1/PURA/TELO2/TERF2IP/ZBTB10/HMBOX1/NCL/RPA1/HNRNPD/TERT/CTC1/SMG1/UPF2/PIF1/WRN/TENM1/APEX1/UPF1/XRCC5/SMG5/BLM/SMG7/KDM1A/SMG6/STON1/XRCC6/RAD50/ZBTB48/TERF1	30
Transition Metal Ion Transmembrane Transporter Activity (GO:0046915)	Transition Metal Ion Transmembrane Transporter Activity (GO:0046915)	Transition Metal Ion Transmembrane Transporter Activity (GO:0046915)	30/8517	33/12126	0.00449686	0.0350654	0.0262738	SLC31A1/SLC11A2/SLC30A1/SLC39A14/SLC39A9/SLC39A10/SLC30A6/SLC39A8/SLC30A7/SLC30A4/SLC39A6/SLC39A1/SLC30A10/SLC30A8/SLC40A1/MCOLN1/SLC31A2/SLC39A7/SLC39A3/TMEM165/SLC39A11/TTYH1/SLC39A13/SLC30A5/SLC30A3/SLC39A4/ATP7B/SLC11A1/SLC30A9/SLC39A12	30
snRNA Binding (GO:0017069)	snRNA Binding (GO:0017069)	snRNA Binding (GO:0017069)	38/8517	43/12126	0.00455486	0.0351231	0.026317	PRPF4/CCNT1/CCNT2/CDK9/SNRPA1/SNRPB2/DDX21/EFTUD2/SF3B3/GEMIN5/MEPCE/LSM10/LSM11/PRPF8/RBM41/HNRNPU/SNRNP70/SNRPD3/DDX39B/RBM22/HNRNPC/LSM4/TUT1/ISG20/COIL/TOE1/EIF5A/SNRPA/HEXIM1/SART3/PRPF31/LSM7/LSM2/NCBP2/LARP7/RBM7/LSM8/RNPC3	38
RNA Polymerase III Activity (GO:0001056)	RNA Polymerase III Activity (GO:0001056)	RNA Polymerase III Activity (GO:0001056)	15/8517	15/12126	0.0049767	0.0379541	0.0284383	POLR2E/POLR1C/POLR3A/POLR3E/POLR3D/POLR2L/POLR3B/POLR3F/POLR3C/POLR3K/POLR2K/POLR2F/POLR2H/POLR3H/POLR1D	15
Protein Phosphatase Regulator Activity (GO:0019888)	Protein Phosphatase Regulator Activity (GO:0019888)	Protein Phosphatase Regulator Activity (GO:0019888)	52/8517	61/12126	0.00524086	0.0395343	0.0296223	CALM2/PPP6R3/PPP1R15B/PPP6R1/DMPK/PPP2R1A/PPP2R1B/PPP2R5C/SHOC2/CABIN1/RCAN3/CALM1/CALM3/PPP2R2A/PPP1R2/PPP3R1/ARPP19/PPP2R2B/PPP2R2D/MGAT5/SET/GNA12/PPP1R7/PPP2R3A/PPP6R2/PPP4R1/LMTK2/PHACTR4/PPP1R9B/PPP4R2/PPME1/PPP1R16B/RCAN2/IGBP1/PTN/PPP2R5E/B3GAT3/PPP4R4/PPP1R15A/RCAN1/PPP2R5A/EIF2AK2/PPP1R16A/BOD1/PPP2R5D/PPP2R2C/PPP2R3B/DMBT1/ENSA/PPP2R5B/STYXL1/LGALS3	52
Histone Acetyltransferase Activity (GO:0004402)	Histone Acetyltransferase Activity (GO:0004402)	Histone Acetyltransferase Activity (GO:0004402)	25/8517	27/12126	0.00539575	0.0398367	0.0298488	NAA50/TAF9/NCOA3/SRCAP/TADA2A/CLOCK/BAZ1A/ATF2/CREBBP/EP300/TAF1/KAT6A/KAT2B/KAT6B/NAA60/KAT5/MCM3AP/USP22/ING3/BRCA2/KAT2A/KAT7/TAF10/HAT1/TAF1L	25
Tumor Necrosis Factor Receptor Superfamily Binding (GO:0032813)	Tumor Necrosis Factor Receptor Superfamily Binding (GO:0032813)	Tumor Necrosis Factor Receptor Superfamily Binding (GO:0032813)	25/8517	27/12126	0.00539575	0.0398367	0.0298488	TRIM37/TNF/TNFSF9/TRAF4/CD40LG/TMBIM1/TRAF6/MYD88/EDA/TNFSF18/FEM1B/FADD/STAT1/TRAF1/TRAF3/DAB2IP/BID/ETFA/NOL3/RIPK1/TRAF2/CASP8AP2/PIDD1/SIVA1/TNFSF4	25
Telomerase RNA Binding (GO:0070034)	Telomerase RNA Binding (GO:0070034)	Telomerase RNA Binding (GO:0070034)	20/8517	21/12126	0.0059054	0.0426911	0.0319876	PTEN/DKC1/DHX36/NOP10/EXOSC10/TERT/HNRNPU/SNRPD3/XRN1/DCP2/HNRNPC/SMG5/PARN/SNRPB/SMG7/SMG6/NHP2/PINX1/TNIP1/WRAP53	20
Transforming Growth Factor Beta Binding (GO:0050431)	Transforming Growth Factor Beta Binding (GO:0050431)	Transforming Growth Factor Beta Binding (GO:0050431)	20/8517	21/12126	0.0059054	0.0426911	0.0319876	TGFBR2/TGFBR1/TGFBR3/VASN/TSKU/ITGAV/THBS1/ENG/LTBP1/TWSG1/CD109/ACVRL1/TGFB3/CD36/LRRC32/LTBP2/LTBP4/WFIKKN1/NRROS/HYAL2	20
Protein Phosphatase Binding (GO:0019903)	Protein Phosphatase Binding (GO:0019903)	Protein Phosphatase Binding (GO:0019903)	93/8517	115/12126	0.00647349	0.0463155	0.0347033	HSP90B1/MET/STAT3/MASTL/EGFR/PIK3R1/TP53/CDC27/KCNN4/SLC9A1/PPP1R11/SHOC2/MTMR3/MTMR4/PTPRT/AKAP11/ANKLE2/STX17/CDKN1B/FOXO1/VCP/PIK3R2/JAK1/CTNNB1/JUP/MAPK8/RPA2/STRN/SNX3/ARPP19/ANAPC5/PPP3CB/SOD1/ANK1/SH3RF2/PPP1R3D/KIF3A/MAPK14/PTK2/IQGAP1/ATP2B4/GNA12/ITGA1/PXN/AP3B1/PDLIM4/SPHK1/MFHAS1/EIF2AK3/MVP/KIFAP3/PHACTR4/MTMR9/PPP1R3B/PPP1R9B/PPME1/STRN4/STRN3/PPP1R3F/MYO16/IGBP1/GTF2F1/MAP3K5/PPP1R…	93
Clathrin Adaptor Activity (GO:0035615)	Clathrin Adaptor Activity (GO:0035615)	Clathrin Adaptor Activity (GO:0035615)	14/8517	14/12126	0.007089	0.0496946	0.0372351	AP2M1/AP2A1/AP2B1/AP2S1/AP2A2/DAB2/STON2/AP1M2/LDLRAP1/AP1M1/HIP1R/STON1/HIP1/AP1G2	14
Myosin V Binding (GO:0031489)	Myosin V Binding (GO:0031489)	Myosin V Binding (GO:0031489)	14/8517	14/12126	0.007089	0.0496946	0.0372351	RAB14/RAB27B/RAB10/RAB3B/RAB6B/RAB6A/RAB3C/RAB39B/RAB8A/RAB3A/RAB11A/RAB3D/RAB11B/RAB25	14

[truncated: 11 more sheets: Table S10, Table S11, Table S12, Table S13, Table S14, Table S15, Table S16, Table S17, Table S18, Table S19, Table S20]
