# Supplementary material
Source: Research Square preprint supplement (doi:10.21203/rs.3.rs-9648282/v1)
Supplement: Supplementary file 4 [file 6ac8888a97cfd3fffb4fe8d5.pdf]

## Figure S3

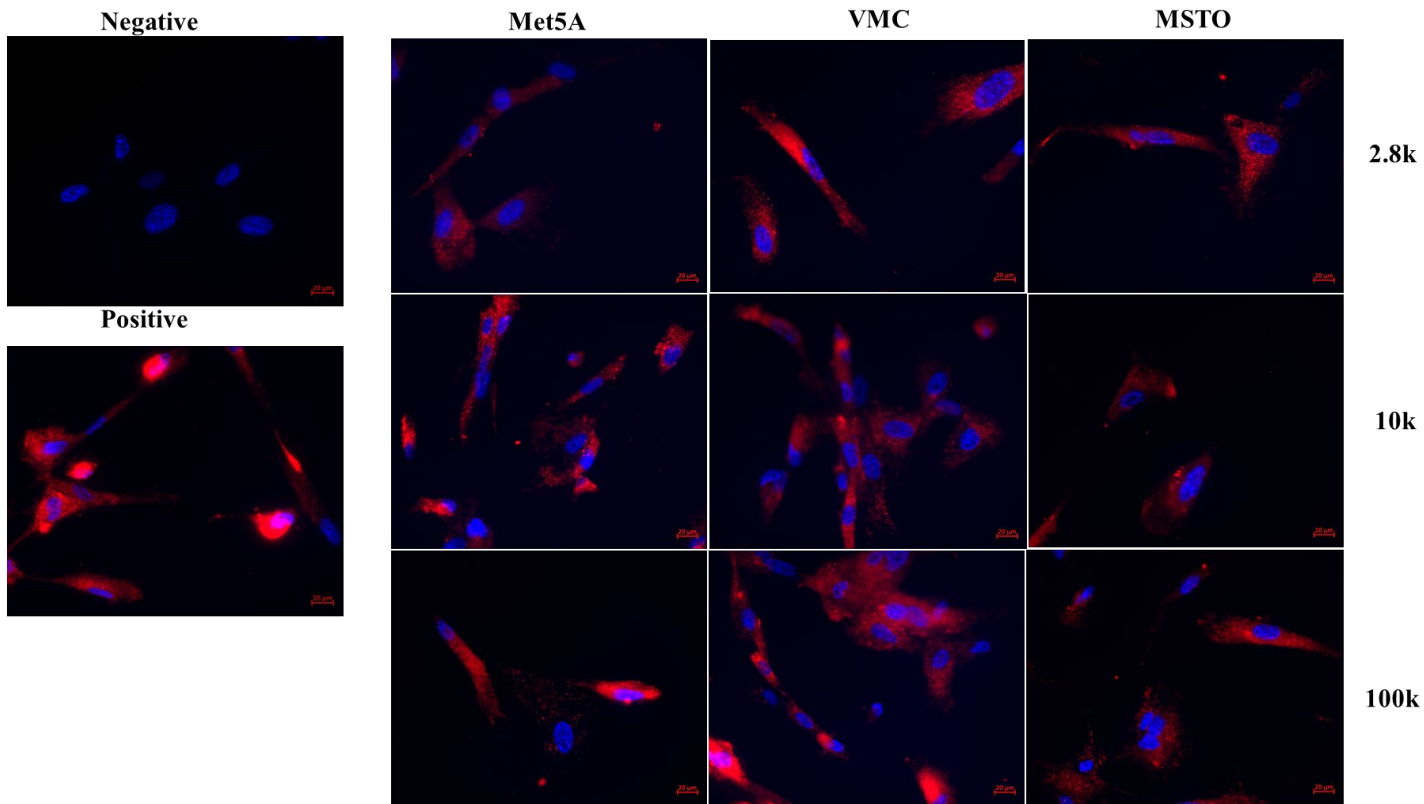

**Figure S3: Representative images of the uptake of PKH26 labelled EVs by fibroblasts (MRC5).** Negative: Unstained fibroblasts (MRC5); Positive/PKH26 control: dye-only control; Met5A, VMC23, MSTO 2.8k/10k/100k: Fibroblasts (MRC5) treated with EV fractions isolated by differential centrifugation from the indicated cell lines (2,800 × g, 10,000 × g, and 100,000 × g). n=3. Scale bar, 20 μm.
