# Supplementary material
Source: Research Square preprint supplement (doi:10.21203/rs.3.rs-9648282/v1)
Supplement: Supplementary file 4 [file c753523de30b2ed013b10722.xlsx]

## Sheet: Summary
miRNA cargo from pleural mesothelioma-derived extracellular vesicles reprograms fibroblasts to cancer associated phenotype
Vivek Dharwal1,3, Winston Lay1, Richard Zelei1,3, Ali Azimi 7,8, Lucy Wang1, Tim Huang6, Ling Zhuang1, Georges Grau3, Stephen Clarke3, Steven Kao1,5, Fatemeh Vafaee4,6, Zaklina Kovacevic2, Elham Hosseini-Beheshti1,3,9
Table
Table S1: mRNA summary
Table S2: Differential mRNA expression for fibroblast treated with Met5A 2.8k EV vs MSTO 2.8k EV
Table S3: Differential mRNA expression for fibroblast treated with Met5A 10k EV vs MSTO 10k EV
Table S4: Differential mRNA expression for fibroblast treated with Met5A 100k EV vs MSTO 100k EV
Table S5: Differential mRNA expression for fibroblast treated with Met5A 2.8k EV vs VMC23 2.8k EV
Table S6: Differential mRNA expression for fibroblast treated with Met5A 10k EV vs VMC23 10k EV
Table S7: Differential mRNA expression for fibroblast treated with Met5A 100k EV vs VMC23 100k EV
Table S8: GSEA analysis (KEGG_2021) for fibroblast treated with Met5A 2.8k EV vs MSTO 2.8k EV
Table S9: GSEA analysis (KEGG_2021) for fibroblast treated with Met5A 10k EV vs MSTO 10k EV
Table S10: GSEA analysis (KEGG_2021) for fibroblast treated with Met5A 100k EV vs MSTO 100k EV
Table S11: GSEA analysis (KEGG_2021) for fibroblast treated with Met5A 2.8k EV vs VMC23 2.8k EV
Table S12: GSEA analysis (KEGG_2021) for fibroblast treated with Met5A 100k EV vs VMC23 10k EV
Table S13: GSEA analysis (KEGG_2021) for fibroblast treated with Met5A 100k EV vs VMC23 100k EV
Table S14 GSEA analysis (MSigDB_Oncogenic_Signatures) for upregulated genes in fibroblasts treated with Met5A 2.8k and MSTO 2.8k
Table S15 GSEA analysis (MSigDB_Oncogenic_Signatures) for Downregulated genes in fibroblasts treated with Met5A 2.8k and MSTO 2.8k
Table S16 GSEA analysis (MSigDB_Oncogenic_Signatures) for upregulated genes in fibroblasts treated with Met5A 10k and MSTO 10k
Table S17 GSEA analysis (MSigDB_Oncogenic_Signatures) for Downregulated genes in fibroblasts treated with Met5A 10k and MSTO 10k
Table S18 GSEA analysis (MSigDB_Oncogenic_Signatures) for upregulated genes in fibroblasts treated with Met5A 100k and MSTO 100k
Table S19 GSEA analysis (MSigDB_Oncogenic_Signatures) for Downregulated genes in fibroblasts treated with Met5A 100k and MSTO 100k
Table S20 GSEA analysis (MSigDB_Oncogenic_Signatures) for upregulated genes in fibroblasts treated with Met5A 2.8k and VMC23 2.8k
Table S21 GSEA analysis (MSigDB_Oncogenic_Signatures) for Downregulated genes in fibroblasts treated with Met5A 2.8k and VMC23 2.8k
Table S22 GSEA analysis (MSigDB_Oncogenic_Signatures) for upregulated genes in fibroblasts treated with Met5A 10k and VMC23 10k
Table S23 GSEA analysis (MSigDB_Oncogenic_Signatures) for Downregulated genes in fibroblasts treated with Met5A 10k and VMC23 10k
Table S24 GSEA analysis (MSigDB_Oncogenic_Signatures) for upregulated genes in fibroblasts treated with Met5A 100k and VMC23 100k
Table S25 GSEA analysis (MSigDB_Oncogenic_Signatures) for Downregulated genes in fibroblasts treated with Met5A 100k and VMC23 100k

## Sheet: Table S1
Sample Name	Raw Reads	Clean Reads	Average Read Length (raw)	Average Read Length (trimmed)	Mapped Reads (%)
Fibroblast treated with MSTO 2.8k EVs Replicate 1	82818577	82739785	145	145	91.6
Fibroblast treated with MSTO Conditioned media Replicate 1	67927426	67833144	145	145	90.4
Fibroblast treated with VMC 100k EVs Replicate 1	87193598	87116264	146	145	90.9
Fibroblast treated with VMC 10k EVs Replicate 1	81880999	81801930	145	145	88.7
Fibroblast treated with VMC 2.8k EVs Replicate 1	80447241	80377816	145	144	88.4
Fibroblast treated with VMC Conditioned media Replicate 1	95630983	95539396	145	145	88.9
Control Fibroblast (Untreated) Replicate 1	84320029	84248169	145	145	89.2
Fibroblast treated with MSTO 10k EVs Replicate 1	94598176	94511964	145	144	89.8
Fibroblast treated with MSTO 100k EVs Replicate 1	79679348	79589589	145	145	88.1
Control Fibroblast (Untreated) Replicate 2	89199794	89090462	145	145	90.8
Fibroblast treated with VMC 10k EVs Replicate 2	87788553	87706155	145	145	88.4
Fibroblast treated with VMC 100k EVs Replicate 2	97033782	96950292	145	145	89
Fibroblast treated with VMC Conditioned media Replicate 2	89737594	89595549	145	145	90.6
Fibroblast treated with MSTO 100k EVs Replicate 2	81096629	80894995	145	145	89.1
Fibroblast treated with MSTO 10k EVs Replicate 2	87287529	87211183	146	145	91.5
Fibroblast treated with MSTO 2.8k EVs Replicate 2	77306533	77206853	145	145	90.4
Fibroblast treated with MSTO Conditioned media Replicate 2	78776982	78704997	145	145	88.8
Fibroblast treated with VMC Conditioned media Replicate 3	87659625	87576026	145	145	88.7
Control Fibroblast (Untreated) Replicate 3	79065265	79002015	146	145	91.2
Fibroblast treated with MSTO 100k EVs Replicate 3	71872421	71777005	145	145	88.6
Fibroblast treated with MSTO 10k EVs Replicate 3	82307593	82249918	145	145	87.2
Fibroblast treated with MSTO 2.8k EVs Replicate 3	79843146	79762446	145	145	87.7
Fibroblast treated with MSTO Conditioned media Replicate 3	81459847	81384682	145	145	91.9
Fibroblast treated with VMC 100k EVs Replicate 3	97804694	97709062	145	145	90.4
Fibroblast treated with VMC 10k EVs Replicate 3	69893985	69831316	145	144	88.4
Fibroblast treated with VMC 2.8k EVs Replicate 3	62974120	62881573	145	145	88.4
Met5a treated with 10k EVs Replicate 1	68654119	68601799	100	99	97.6
Met5a treated with 2.8k EVs Replicate 1	96074927	95992146	100	99	97.1
Met5a treated with 2.8k EVs Replicate 2	99498021	99420233	100	99	97.1
Met5a treated with 2.8k EVs Replicate 3	87596104	87483631	100	99	97.3
Met5a treated with 100k EVs Replicate 1	81997650	81870337	100	99	97.6
Met5a treated with 100k EVs Replicate 2	101900409	101774870	100	99	97.6
Met5a treated with 100k EVs Replicate 3	89543608	89439885	100	99	96.7
Met5a treated with 10k EVs Replicate 2	94568586	94494577	100	99	96.3
Met5a treated with 10k EVs Replicate 3	99709255	99511511	100	99	97.2

## Sheet: Table S2
Diffrential mRNA expression for fibroblast treated with Met5A 2.8k EV vs MSTO 2.8k EV
	logFC	logCPM	LR	PValue	FDR	adj-P	diffexp	gene.type	label
POTEE	4.32739	1.81558	244.193	4.79122e-55	1.9916e-52	51.7008	UP	protein_coding	POTEE
ACTA1	3.95897	0.769528	184.853	4.22542e-42	9.55691e-40	39.0197	UP	protein_coding	ACTA1
POTEI	4.82104	0.20576	165.054	8.90426e-38	1.53874e-35	34.8128	UP	protein_coding	POTEI
ZC3H11B	3.73401	0.807098	158.715	2.15991e-36	3.69104e-34	33.4329	UP	protein_coding	ZC3H11B
EIF5AL1	2.86035	1.51287	158.347	2.59902e-36	4.39264e-34	33.3573	UP	protein_coding	EIF5AL1
GLUD2	3.07843	0.468269	143.198	5.32164e-33	7.79494e-31	30.1082	UP	protein_coding	GLUD2
GGH	1.91916	4.26649	128.909	7.09833e-30	8.94855e-28	27.0482	UP	protein_coding	GGH
PGAM4	3.96508	0.148296	117.745	1.97146e-27	2.35047e-25	24.6288	UP	protein_coding	PGAM4
TK1	3.01495	4.56915	115.62	5.75746e-27	6.75952e-25	24.1701	UP	protein_coding
AXL	1.21744	9.51778	111.814	3.92495e-26	4.28126e-24	23.3684	UP	protein_coding
CLCA2	-3.01484	1.49265	109.193	1.47223e-25	1.55088e-23	22.8094	DOWN	protein_coding	CLCA2
EIF3CL	3.04929	5.96654	99.5226	1.9394e-23	1.81877e-21	20.7402	UP	protein_coding
FKBP1C	2.34983	1.71077	98.0291	4.12281e-23	3.79694e-21	20.4206	UP	protein_coding
ACSL4	-0.892632	7.76628	78.6674	7.34993e-19	5.46096e-17	16.2627	NO	protein_coding
RPS27AP5	2.75598	-0.0592752	74.8854	4.98839e-18	3.48734e-16	15.4575	UP	protein_coding
HERC4	0.953158	7.8737	74.7346	5.3843e-18	3.74708e-16	15.4263	NO	protein_coding
SMPDL3A	-1.32315	3.95318	73.5208	9.95833e-18	6.86812e-16	15.1632	DOWN	protein_coding	SMPDL3A
DRAP1	1.31166	6.73777	71.3173	3.04151e-17	2.06984e-15	14.6841	UP	protein_coding
USP46	-0.854024	5.44983	69.546	7.46538e-17	5.01386e-15	14.2998	NO	protein_coding
TWSG1	-1.55464	8.39831	69.4397	7.8788e-17	5.24571e-15	14.2802	DOWN	protein_coding	TWSG1
CAVIN3	0.928154	6.53037	69.3163	8.38722e-17	5.56015e-15	14.2549	NO	protein_coding
C4B	-3.38935	2.44695	68.9628	1.00337e-16	6.6231e-15	14.1789	DOWN	protein_coding	C4B
MMD	-2.17466	4.53229	65.1546	6.92478e-16	4.38284e-14	13.3582	DOWN	protein_coding	MMD
LMNA	0.940828	9.30687	62.8593	2.22018e-15	1.36586e-13	12.8646	NO	protein_coding
MYPN	1.21326	5.43894	62.7787	2.31288e-15	1.41722e-13	12.8486	UP	protein_coding
SPC24	2.66502	3.33654	62.6244	2.50141e-15	1.52062e-13	12.818	UP	protein_coding
JCAD	-0.819565	8.2482	62.2596	3.01036e-15	1.79927e-13	12.7449	NO	protein_coding
PRR11	2.1907	5.54881	61.8165	3.7701e-15	2.21313e-13	12.655	UP	protein_coding
ZDHHC12	0.984969	3.51521	61.3286	4.8302e-15	2.80334e-13	12.5523	NO	protein_coding
LNX1	-3.9422	-0.237998	61.1516	5.28441e-15	3.04398e-13	12.5166	DOWN	protein_coding	LNX1
MOSPD1	-0.888053	4.92942	60.592	7.02189e-15	4.02973e-13	12.3947	NO	protein_coding
ARL5B	-0.838499	5.76773	60.3415	7.97476e-15	4.55954e-13	12.3411	NO	protein_coding
HECW2	1.51374	4.39891	60.098	9.02485e-15	5.14082e-13	12.289	UP	protein_coding
IL1R1	-1.84778	6.31335	59.4776	1.23696e-14	7.02012e-13	12.1537	DOWN	protein_coding	IL1R1
PTTG1	2.21396	3.85613	58.6387	1.89453e-14	1.05572e-12	11.9765	UP	protein_coding
CHI3L1	-3.72793	1.04425	58.2919	2.25969e-14	1.25466e-12	11.9015	DOWN	protein_coding	CHI3L1
HNRNPA1L3	1.34834	2.20005	58.1742	2.39903e-14	1.32723e-12	11.8771	UP	protein_coding
CIT	2.47163	5.27628	57.661	3.11413e-14	1.70446e-12	11.7684	UP	protein_coding
RARRES1	-3.64578	0.423721	57.1908	3.95523e-14	2.15715e-12	11.6661	DOWN	protein_coding
DRAM1	-1.26907	6.53362	56.837	4.73468e-14	2.57312e-12	11.5895	DOWN	protein_coding
CENPF	3.11199	6.24288	56.7035	5.06737e-14	2.7346e-12	11.5631	UP	protein_coding
WWTR1	-0.773939	6.70436	56.1553	6.69657e-14	3.58862e-12	11.4451	NO	protein_coding
RGS7	2.9133	0.875573	55.5589	9.0698e-14	4.82677e-12	11.3163	UP	protein_coding
CENPW	2.53528	1.60915	55.3123	1.02824e-13	5.45323e-12	11.2633	UP	protein_coding
RASSF3	-0.938971	6.56053	55.2948	1.03743e-13	5.48303e-12	11.261	NO	protein_coding
DTD1	0.987331	4.13421	55.0329	1.18529e-13	6.24306e-12	11.2046	NO	protein_coding
PIN1	0.796712	5.02674	55.0237	1.19087e-13	6.25107e-12	11.204	NO	protein_coding
TMEM98	-0.741916	5.78595	54.4599	1.58651e-13	8.29951e-12	11.0809	NO	protein_coding
TMEM217	-1.54741	1.4644	53.7849	2.23682e-13	1.15444e-11	10.9376	DOWN	protein_coding
PRC1	3.03207	5.05801	53.7077	2.32655e-13	1.19274e-11	10.9235	UP	protein_coding
CDCA3	3.26383	3.19047	53.5453	2.52703e-13	1.29122e-11	10.889	UP	protein_coding
RNASEH2A	1.92505	2.62454	52.4817	4.3427e-13	2.21161e-11	10.6553	UP	protein_coding
MCC	-1.39257	5.75863	52.3164	4.72424e-13	2.39798e-11	10.6202	DOWN	protein_coding
SAPCD2	3.44465	2.10982	52.1526	5.13504e-13	2.59793e-11	10.5854	UP	protein_coding
APOBEC3B	3.00765	2.66784	51.8353	6.03569e-13	3.04357e-11	10.5166	UP	protein_coding
CD68	1.13275	5.61587	51.703	6.45654e-13	3.23458e-11	10.4902	UP	protein_coding
TBCEL	-0.590137	4.56129	51.2928	7.95685e-13	3.9604e-11	10.4023	NO	protein_coding
ACAP2	-0.601029	7.09121	51.2096	8.30105e-13	4.11839e-11	10.3853	NO	protein_coding
KLHL5	-1.14118	7.43688	51.2	8.34202e-13	4.12541e-11	10.3845	DOWN	protein_coding
FOXM1	2.48132	4.86802	50.8835	9.80124e-13	4.83151e-11	10.3159	UP	protein_coding
NRM	1.20428	3.27698	50.4161	1.24369e-12	6.07235e-11	10.2166	UP	protein_coding
PLP2	1.39506	5.7676	50.0411	1.50557e-12	7.30465e-11	10.1364	UP	protein_coding
KIF20A	3.00727	4.79302	50.0253	1.5178e-12	7.34082e-11	10.1343	UP	protein_coding
FIBIN	-1.50949	5.09853	49.8395	1.66851e-12	8.04443e-11	10.0945	DOWN	protein_coding
MARCHF4	1.25684	5.86684	49.247	2.25675e-12	1.08465e-10	9.96471	UP	protein_coding
NRGN	1.59663	2.58821	49.2045	2.30617e-12	1.10495e-10	9.95666	UP	protein_coding
ARRB1	-1.90394	4.90473	49.1754	2.34071e-12	1.11801e-10	9.95155	DOWN	protein_coding
CDKN3	2.71805	2.12984	48.445	3.39689e-12	1.60258e-10	9.79518	UP	protein_coding
CENPM	3.05235	1.05426	48.4202	3.43999e-12	1.61795e-10	9.79103	UP	protein_coding
DOCK5	0.855883	6.86858	48.2232	3.80361e-12	1.7781e-10	9.75004	NO	protein_coding
RUVBL2	0.816404	5.64247	47.8097	4.69669e-12	2.17576e-10	9.66239	NO	protein_coding
H1.5	3.6611	5.45182	47.7676	4.79853e-12	2.20962e-10	9.65568	UP	protein_coding
ITGA1	-1.14183	7.79238	47.6869	5.00012e-12	2.29558e-10	9.63911	DOWN	protein_coding
BUB1	3.08596	4.54236	47.4842	5.54484e-12	2.52307e-10	9.59807	UP	protein_coding
RGPD3	1.71526	0.817234	47.2517	6.24323e-12	2.83247e-10	9.54783	UP	protein_coding
BMF	-1.92056	3.33783	47.2397	6.28157e-12	2.84149e-10	9.54645	DOWN	protein_coding
TACC3	2.51128	4.85663	47.1385	6.61432e-12	2.97451e-10	9.52658	UP	protein_coding
TPT1	-0.804184	9.80599	47.0194	7.02883e-12	3.1517e-10	9.50145	NO	protein_coding
CENPE	2.70625	5.03556	46.9595	7.24701e-12	3.23258e-10	9.49045	UP	protein_coding
PLAT	-2.23548	7.4806	46.8334	7.72837e-12	3.42543e-10	9.46528	DOWN	protein_coding
TENT5C	-1.16111	5.48371	46.7761	7.95786e-12	3.51701e-10	9.45383	DOWN	protein_coding
H2AC15	2.41634	2.39846	46.7291	8.15098e-12	3.59204e-10	9.44466	UP	protein_coding
H3C2	3.4715	4.59502	46.5304	9.02093e-12	3.96405e-10	9.40186	UP	protein_coding
HMGB2	2.00979	4.38369	46.4568	9.36586e-12	4.09224e-10	9.38804	UP	protein_coding
IQGAP3	3.18272	5.1332	46.1083	1.11896e-11	4.87525e-10	9.312	UP	protein_coding
CCNB2	2.54112	3.49152	45.988	1.1898e-11	5.15469e-10	9.2878	UP	protein_coding
IRAG1	-1.09329	6.1001	45.9342	1.22291e-11	5.28327e-10	9.2771	DOWN	protein_coding
MKI67	3.41286	6.88137	45.817	1.29831e-11	5.59329e-10	9.25233	UP	protein_coding
CCNB1	2.47848	4.96757	45.7793	1.32352e-11	5.68597e-10	9.2452	UP	protein_coding
SESN3	-1.38334	5.288	45.5432	1.49313e-11	6.39673e-10	9.19404	DOWN	protein_coding
H2AC16	3.2855	3.37324	45.2281	1.75371e-11	7.45086e-10	9.12779	UP	protein_coding
RECK	-1.0298	7.14433	45.2052	1.77435e-11	7.51779e-10	9.12391	DOWN	protein_coding
MT2A	2.11584	8.15505	44.7537	2.23444e-11	9.44114e-10	9.02498	UP	protein_coding
NR2F1	-0.973076	6.12231	44.7341	2.25694e-11	9.51006e-10	9.02182	NO	protein_coding
PIMREG	3.06602	2.63019	44.6283	2.38219e-11	1.00104e-09	8.99955	UP	protein_coding
H3C13	3.56657	2.22064	44.4725	2.5796e-11	1.08104e-09	8.96616	UP	protein_coding
RPS6KA4	1.02019	5.44768	44.4268	2.64045e-11	1.10354e-09	8.95721	UP	protein_coding
H2AC13	3.05134	3.89655	44.3539	2.74065e-11	1.14231e-09	8.94222	UP	protein_coding
NSG1	-1.85768	2.84355	44.2846	2.83946e-11	1.18029e-09	8.92801	DOWN	protein_coding
CDC20	3.329	4.52048	44.2403	2.90445e-11	1.20406e-09	8.91935	UP	protein_coding
CAMK1D	-2.02903	3.588	44.1864	2.98553e-11	1.23434e-09	8.90856	DOWN	protein_coding
C4A	-1.7746	3.08888	44.0325	3.22971e-11	1.33171e-09	8.87559	DOWN	protein_coding
GADD45B	1.10101	4.33232	43.7327	3.76421e-11	1.54796e-09	8.81024	UP	protein_coding
SHCBP1	2.90072	4.32415	43.7274	3.77452e-11	1.54806e-09	8.81021	UP	protein_coding
CIPC	-0.643359	3.83724	43.687	3.85333e-11	1.57617e-09	8.8024	NO	protein_coding
PCSK5	-1.13973	2.75293	43.6488	3.92909e-11	1.6029e-09	8.79509	DOWN	protein_coding
MCM5	2.03024	4.75748	43.5849	4.05956e-11	1.65016e-09	8.78247	UP	protein_coding
NUDT5	-0.635516	5.05833	43.5816	4.0664e-11	1.65016e-09	8.78247	NO	protein_coding
DUT	0.858017	4.49501	43.5454	4.14244e-11	1.6766e-09	8.77557	NO	protein_coding
KIF26B	-2.26778	3.51567	43.3776	4.51331e-11	1.82191e-09	8.73947	DOWN	protein_coding
KIFC1	3.18635	3.86109	43.3424	4.59527e-11	1.84546e-09	8.73389	UP	protein_coding
CIBAR1	-0.949223	4.55609	43.3422	4.59566e-11	1.84546e-09	8.73389	NO	protein_coding
TUBB4B	1.0298	7.77697	43.2411	4.83935e-11	1.93826e-09	8.71259	UP	protein_coding
FST	1.24246	7.52047	43.2028	4.93488e-11	1.97139e-09	8.70523	UP	protein_coding
PALLD	-0.728658	9.44937	43.1039	5.19091e-11	2.06829e-09	8.68439	NO	protein_coding
ANLN	2.69166	7.09556	43.0529	5.32803e-11	2.11745e-09	8.67419	UP	protein_coding
PLK1	2.85423	4.52878	42.53	6.96068e-11	2.73799e-09	8.56257	UP	protein_coding
MMP3	2.1797	3.22312	42.2679	7.95869e-11	3.11462e-09	8.50659	UP	protein_coding
GADD45GIP1	1.00045	4.02518	42.1546	8.43373e-11	3.28382e-09	8.48362	UP	protein_coding
ZFAND5	-1.15118	7.84874	42.0739	8.78884e-11	3.41345e-09	8.46681	DOWN	protein_coding
YIF1B	0.888991	4.89273	41.9223	9.49712e-11	3.66999e-09	8.43533	NO	protein_coding
ARL15	-0.804657	3.88849	41.8572	9.81873e-11	3.78476e-09	8.42196	NO	protein_coding
NTN1	-2.32457	0.844131	41.8457	9.87685e-11	3.79765e-09	8.42049	DOWN	protein_coding
CENPH	2.00355	1.83864	41.8193	1.00109e-10	3.83958e-09	8.41572	UP	protein_coding
H3C3	3.09349	3.99635	41.6352	1.09994e-10	4.20823e-09	8.3759	UP	protein_coding
N4BP2	-0.972607	3.87971	41.526	1.16313e-10	4.43895e-09	8.35272	NO	protein_coding
CEP55	2.99348	4.10816	41.4576	1.20452e-10	4.58404e-09	8.33875	UP	protein_coding
NDUFS7	0.797765	4.43727	41.4535	1.20711e-10	4.58404e-09	8.33875	NO	protein_coding
BIRC5	2.96491	4.4138	41.3955	1.24341e-10	4.71025e-09	8.32696	UP	protein_coding
CCN4	-3.16378	3.9725	41.3459	1.27539e-10	4.81951e-09	8.317	DOWN	protein_coding
TPX2	2.35084	5.77335	41.2516	1.33845e-10	5.04542e-09	8.2971	UP	protein_coding
H4C13	3.09773	2.54778	41.201	1.37351e-10	5.16494e-09	8.28693	UP	protein_coding
ZNF561	-0.504139	5.23896	41.1046	1.44299e-10	5.40995e-09	8.26681	NO	protein_coding
SPAG5	2.7425	4.47729	41.1009	1.4457e-10	5.40995e-09	8.26681	UP	protein_coding
EBP	1.17482	3.54903	41.0189	1.50763e-10	5.62801e-09	8.24965	UP	protein_coding
ARL1	-0.58359	6.73747	40.9397	1.57e-10	5.84665e-09	8.23309	NO	protein_coding
CROT	-1.02675	4.87666	40.8127	1.67544e-10	6.22422e-09	8.20592	DOWN	protein_coding
DKK1	1.78556	5.04444	40.7631	1.71849e-10	6.36876e-09	8.19595	UP	protein_coding
PDE5A	-1.3218	9.76584	40.6457	1.82493e-10	6.74697e-09	8.17089	DOWN	protein_coding
ADGRL1	-1.35353	2.94782	40.4456	2.02165e-10	7.45636e-09	8.12747	DOWN	protein_coding
PDPN	-2.93553	2.2896	40.3546	2.11802e-10	7.7931e-09	8.10829	DOWN	protein_coding
DPY19L3	-0.639966	6.11149	40.3208	2.15503e-10	7.91036e-09	8.1018	NO	protein_coding
IL17RE	1.69917	2.204	40.2335	2.25356e-10	8.25231e-09	8.08342	UP	protein_coding
H2BC18	2.43562	4.30692	40.1322	2.37344e-10	8.67066e-09	8.06195	UP	protein_coding
APOE	-2.13894	2.17522	40.0312	2.49941e-10	9.10924e-09	8.04052	DOWN	protein_coding
CREB3L2	0.781638	8.08202	39.9631	2.58811e-10	9.41018e-09	8.0264	NO	protein_coding
DHRS3	-2.44494	4.19221	39.8858	2.69258e-10	9.76696e-09	8.01024	DOWN	protein_coding
RHOQ	-0.701656	7.11428	39.8769	2.70485e-10	9.78837e-09	8.00929	NO	protein_coding
AHCYL1	-0.577275	6.6311	39.7994	2.81429e-10	1.01605e-08	7.99308	NO	protein_coding
LPXN	1.38279	4.85885	39.7843	2.8362e-10	1.02156e-08	7.99073	UP	protein_coding
RFTN1	-0.827425	6.20369	39.7016	2.95883e-10	1.06076e-08	7.97438	NO	protein_coding
EXTL2	-0.653689	5.25847	39.5955	3.12397e-10	1.11736e-08	7.95181	NO	protein_coding
TNFRSF21	-1.49589	5.41231	39.4045	3.44503e-10	1.22934e-08	7.91033	DOWN	protein_coding
UBE2S	1.61767	5.63981	39.3647	3.51601e-10	1.25176e-08	7.90248	UP	protein_coding
ZNF8	-0.524179	4.53943	39.2556	3.71793e-10	1.3206e-08	7.87923	NO	protein_coding
KLF2	1.99701	3.85905	39.2432	3.74169e-10	1.32597e-08	7.87747	UP	protein_coding
ATP6V0C	0.839219	7.22983	39.2313	3.76459e-10	1.33102e-08	7.87582	NO	protein_coding
ZWINT	2.55307	3.29871	39.135	3.95497e-10	1.39193e-08	7.85638	UP	protein_coding
HNRNPM	0.866122	6.30784	39.1078	4.01039e-10	1.40821e-08	7.85133	NO	protein_coding
H3C12	3.3579	2.86164	38.8947	4.47285e-10	1.56309e-08	7.80602	UP	protein_coding
AGT	-3.86485	-0.339898	38.8908	4.48195e-10	1.56309e-08	7.80602	DOWN	protein_coding
INO80E	0.563056	5.18831	38.8497	4.57717e-10	1.59269e-08	7.79787	NO	protein_coding
PARD6B	-1.79571	1.17431	38.6841	4.98245e-10	1.7298e-08	7.762	DOWN	protein_coding
CCNA2	2.501	4.50722	38.626	5.13302e-10	1.77806e-08	7.75005	UP	protein_coding
PLEKHA1	-0.55416	4.58861	38.5315	5.38759e-10	1.86205e-08	7.73001	NO	protein_coding
KLHL24	-1.67319	5.25284	38.4553	5.60217e-10	1.93187e-08	7.71402	DOWN	protein_coding
ATF2	-0.533716	5.51557	38.4331	5.66622e-10	1.94958e-08	7.71006	NO	protein_coding
H2AC7	2.16054	3.71244	38.4213	5.7007e-10	1.95707e-08	7.70839	UP	protein_coding
RACGAP1	2.00831	4.74962	38.401	5.76033e-10	1.97314e-08	7.70484	UP	protein_coding
YTHDF3	-0.377812	6.97293	38.3655	5.8659e-10	2.00483e-08	7.69792	NO	protein_coding
H4C4	2.70323	3.44368	38.3182	6.00996e-10	2.04498e-08	7.68931	UP	protein_coding
STK38L	-0.898535	4.07308	38.1882	6.42406e-10	2.18106e-08	7.66133	NO	protein_coding
BACH2	-1.84307	2.25251	38.1422	6.57708e-10	2.2281e-08	7.65207	DOWN	protein_coding
ZEB1	-0.81689	7.92536	38.0206	7.00012e-10	2.3641e-08	7.62633	NO	protein_coding
KIF4A	2.99848	4.01247	38.0181	7.00931e-10	2.3641e-08	7.62633	UP	protein_coding
MRPL24	0.971905	3.81747	37.886	7.50001e-10	2.51856e-08	7.59885	NO	protein_coding
H2AC11	2.69994	4.45486	37.8605	7.59885e-10	2.54147e-08	7.59492	UP	protein_coding
C12orf75	0.748473	7.04919	37.8599	7.60126e-10	2.54147e-08	7.59492	NO	protein_coding
TOP2A	2.69055	6.58292	37.7175	8.17671e-10	2.72793e-08	7.56417	UP	protein_coding
HIRIP3	1.40501	1.35915	37.6676	8.38851e-10	2.79254e-08	7.554	UP	protein_coding
SMC2	1.16887	5.15375	37.6601	8.4209e-10	2.79726e-08	7.55327	UP	protein_coding
H2BC7	2.44666	3.27637	37.6167	8.61041e-10	2.85405e-08	7.54454	UP	protein_coding
ROBO4	1.29611	1.73045	37.5352	8.97778e-10	2.96942e-08	7.52733	UP	protein_coding
FXYD5	1.14355	6.32484	37.4819	9.22674e-10	3.04522e-08	7.51638	UP	protein_coding
TSPAN6	-0.955717	4.31278	37.4246	9.50143e-10	3.12917e-08	7.50457	NO	protein_coding
DEPDC1	2.78556	4.12361	37.4195	9.52673e-10	3.13079e-08	7.50435	UP	protein_coding
PBK	2.92956	3.31879	37.3725	9.7589e-10	3.20025e-08	7.49482	UP	protein_coding
PHLDA2	1.02702	4.98626	37.3258	9.99543e-10	3.27085e-08	7.48534	UP	protein_coding
CEP152	1.552	3.24874	37.2824	1.02204e-09	3.33737e-08	7.4766	UP	protein_coding
SKIL	-0.909441	6.52509	37.2513	1.03844e-09	3.38374e-08	7.4706	NO	protein_coding
NID2	-0.978593	9.17383	37.2134	1.05886e-09	3.44297e-08	7.46307	NO	protein_coding
TMEM64	-0.710145	4.7516	37.2061	1.06281e-09	3.44851e-08	7.46237	NO	protein_coding
CDCA8	2.97022	3.55498	37.1957	1.06847e-09	3.4596e-08	7.46097	UP	protein_coding
PDE4C	-3.01636	1.18205	37.0931	1.12619e-09	3.63882e-08	7.43904	DOWN	protein_coding
STMN1	0.983612	6.77263	37.0846	1.13113e-09	3.64711e-08	7.43805	NO	protein_coding
CAMK1	0.68793	3.69329	37.0316	1.16229e-09	3.73977e-08	7.42716	NO	protein_coding
LYPD6	1.33212	1.17099	36.9154	1.23368e-09	3.96118e-08	7.40218	UP	protein_coding
TNFSF18	-2.57826	1.08623	36.8527	1.27402e-09	4.08216e-08	7.38911	DOWN	protein_coding
ZNF90	1.96393	0.939599	36.8214	1.29459e-09	4.13944e-08	7.38306	UP	protein_coding
HNRNPA1L2	10.433	0.920841	36.648	1.41501e-09	4.50575e-08	7.34623	UP	protein_coding
FGD6	-0.796907	4.71665	36.6147	1.43944e-09	4.5741e-08	7.33969	NO	protein_coding
H2AX	1.72929	5.33883	36.5658	1.47599e-09	4.68056e-08	7.3297	UP	protein_coding
WNT2B	-2.62758	2.57279	36.3829	1.62121e-09	5.11995e-08	7.29073	DOWN	protein_coding
UBE2Q2	-0.50732	5.46844	36.3153	1.67843e-09	5.28981e-08	7.27656	NO	protein_coding
FHIP1A	1.6871	0.314957	36.2784	1.71051e-09	5.3689e-08	7.27011	UP	protein_coding
BAG2	-0.702837	6.10889	36.2361	1.74807e-09	5.47561e-08	7.26157	NO	protein_coding
PRNP	-0.661616	8.14934	36.1344	1.84167e-09	5.7571e-08	7.2398	NO	protein_coding
NDC80	3.05739	3.02535	36.0989	1.8755e-09	5.85094e-08	7.23277	UP	protein_coding
KITLG	-0.798669	6.78656	36.0833	1.89056e-09	5.88601e-08	7.23018	NO	protein_coding
WDR62	2.77126	3.42973	36.0083	1.96478e-09	6.09596e-08	7.21496	UP	protein_coding
METTL8	-0.543305	4.81679	36.0072	1.96593e-09	6.09596e-08	7.21496	NO	protein_coding
RBM42	0.647026	5.43013	35.9826	1.99088e-09	6.16093e-08	7.21035	NO	protein_coding
SEL1L3	-1.07294	5.72706	35.9595	2.01464e-09	6.22193e-08	7.20607	DOWN	protein_coding
ZMAT3	-0.723358	8.22927	35.9005	2.07652e-09	6.40017e-08	7.19381	NO	protein_coding
EPHB1	2.79588	2.01128	35.885	2.09312e-09	6.43842e-08	7.19122	UP	protein_coding
H2AC14	3.07904	3.61519	35.7884	2.19953e-09	6.75225e-08	7.17055	UP	protein_coding
CRISPLD2	-1.6043	5.76468	35.7726	2.21748e-09	6.79379e-08	7.16789	DOWN	protein_coding
TROAP	3.18333	3.09698	35.7532	2.23962e-09	6.84799e-08	7.16444	UP	protein_coding
EIF2S3B	1.37974	0.687358	35.7453	2.24873e-09	6.85295e-08	7.16412	UP	protein_coding
STX6	-0.516262	5.81922	35.7441	2.25016e-09	6.85295e-08	7.16412	NO	protein_coding
QSOX1	-1.16749	10.7728	35.6843	2.32025e-09	7.05246e-08	7.15166	DOWN	protein_coding
H2AC17	2.30615	3.63374	35.674	2.33255e-09	7.07587e-08	7.15022	UP	protein_coding
CYBRD1	-0.894711	7.842	35.6013	2.42122e-09	7.33039e-08	7.13487	NO	protein_coding
PCLAF	2.04171	3.05072	35.5577	2.47608e-09	7.48176e-08	7.126	UP	protein_coding
SLC40A1	-1.90189	3.85523	35.5048	2.54418e-09	7.66284e-08	7.11561	DOWN	protein_coding
NUSAP1	2.66867	4.17649	35.5035	2.54598e-09	7.66284e-08	7.11561	UP	protein_coding
GOSR2	-0.430501	6.39976	35.4918	2.56128e-09	7.69383e-08	7.11386	NO	protein_coding
MYO9A	0.528047	6.26825	35.3959	2.69047e-09	8.06615e-08	7.09333	NO	protein_coding
MZT2B	0.894078	5.20984	35.3462	2.76011e-09	8.25886e-08	7.08308	NO	protein_coding
KNL1	2.91697	5.10994	35.3172	2.80151e-09	8.36644e-08	7.07746	UP	protein_coding
KIAA1549L	1.66956	5.19527	35.2967	2.83108e-09	8.43836e-08	7.07374	UP	protein_coding
TMEM263	-0.570496	7.55755	35.2657	2.87649e-09	8.55713e-08	7.06767	NO	protein_coding
AURKAIP1	0.731684	4.94997	34.8805	3.50569e-09	1.03887e-07	6.98344	NO	protein_coding
C14orf132	-1.11563	6.33935	34.8631	3.53722e-09	1.0462e-07	6.98038	DOWN	protein_coding
CHI3L2	-3.19598	1.197	34.826	3.60533e-09	1.0643e-07	6.97294	DOWN	protein_coding
PYGO1	-0.646071	5.00098	34.8063	3.64199e-09	1.07306e-07	6.96937	NO	protein_coding
PSMC3	0.790231	5.91984	34.7917	3.66931e-09	1.07904e-07	6.96696	NO	protein_coding
PKMYT1	3.2371	2.90601	34.7507	3.74736e-09	1.09989e-07	6.95865	UP	protein_coding
COL4A5	-1.04021	6.4161	34.74	3.76806e-09	1.10386e-07	6.95708	DOWN	protein_coding
GTSE1	3.09911	3.54959	34.7254	3.79637e-09	1.11004e-07	6.95466	UP	protein_coding
SNRPC	0.593845	5.04616	34.6782	3.88966e-09	1.13516e-07	6.94494	NO	protein_coding
MRPL28	0.634214	4.67567	34.6029	4.04295e-09	1.17766e-07	6.92898	NO	protein_coding
CLTB	0.952748	5.12395	34.5822	4.08622e-09	1.18802e-07	6.92518	NO	protein_coding
KDM7A	-0.911906	3.84719	34.5683	4.11554e-09	1.19428e-07	6.92289	NO	protein_coding
DCTN3	0.534222	4.83458	34.5525	4.14903e-09	1.20174e-07	6.92019	NO	protein_coding
KIF20B	1.98577	4.70351	34.547	4.16083e-09	1.20289e-07	6.91978	UP	protein_coding
H3C8	3.18621	3.95322	34.5296	4.19814e-09	1.21139e-07	6.91671	UP	protein_coding
SELENOH	0.640785	4.62378	34.4719	4.3244e-09	1.24549e-07	6.90466	NO	protein_coding
WARS1	-1.36226	7.50718	34.3665	4.56505e-09	1.31235e-07	6.88195	DOWN	protein_coding
HYI	1.02921	4.27096	34.3614	4.5771e-09	1.31335e-07	6.88162	UP	protein_coding
RPL26	-0.527413	7.938	34.2726	4.79084e-09	1.37212e-07	6.86261	NO	protein_coding
ALDH3A2	-0.984904	3.19352	34.1907	4.99674e-09	1.42843e-07	6.84514	NO	protein_coding
RAB23	-0.849768	5.71359	34.1545	5.09063e-09	1.45258e-07	6.83786	NO	protein_coding
CENPX	0.861913	3.30765	34.1199	5.18197e-09	1.4759e-07	6.83094	NO	protein_coding
SULF2	-1.87656	3.17622	34.1082	5.21301e-09	1.482e-07	6.82915	DOWN	protein_coding
AK3	-0.921389	5.97862	34.1015	5.23112e-09	1.4844e-07	6.82845	NO	protein_coding
TIMELESS	1.53802	4.20291	34.0725	5.30953e-09	1.50388e-07	6.82279	UP	protein_coding
RAB13	-0.581015	6.79128	34.0597	5.34465e-09	1.51004e-07	6.82101	NO	protein_coding
TBC1D20	-0.436255	6.20916	34.0574	5.3509e-09	1.51004e-07	6.82101	NO	protein_coding
MYL6	0.763601	8.30733	34.0433	5.38985e-09	1.51571e-07	6.81938	NO	protein_coding
CENPU	2.073	2.65223	34.043	5.39074e-09	1.51571e-07	6.81938	UP	protein_coding
ENTREP3	0.510352	5.75345	34.0332	5.41807e-09	1.52062e-07	6.81798	NO	protein_coding
RIN2	-0.583418	6.40835	33.8442	5.97055e-09	1.67262e-07	6.7766	NO	protein_coding
POC1A	1.8593	2.48556	33.8179	6.05184e-09	1.69232e-07	6.77152	UP	protein_coding
RAB27A	-0.532781	4.27627	33.8102	6.07608e-09	1.69601e-07	6.77057	NO	protein_coding
POLQ	2.69457	3.36891	33.7553	6.24983e-09	1.7382e-07	6.7599	UP	protein_coding
HMMR	2.89296	3.70408	33.7269	6.34165e-09	1.76055e-07	6.75435	UP	protein_coding
HMGA1	0.79297	9.64418	33.7199	6.36479e-09	1.76379e-07	6.75355	NO	protein_coding
GAB1	-1.18455	4.60956	33.5752	6.85609e-09	1.89652e-07	6.72204	DOWN	protein_coding
GSS	0.564876	5.11787	33.5469	6.95653e-09	1.92085e-07	6.71651	NO	protein_coding
MT.ND2	1.6677	8.75317	33.5265	7.02986e-09	1.93762e-07	6.71273	UP	protein_coding
BUB1B	2.90001	3.90285	33.4462	7.3262e-09	2.01209e-07	6.69635	UP	protein_coding
PLSCR1	-0.782019	3.59983	33.3999	7.50262e-09	2.05687e-07	6.68679	NO	protein_coding
UBE2C	3.04491	3.20295	33.3959	7.51806e-09	2.05743e-07	6.68667	UP	protein_coding
KIF23	2.01105	4.96698	33.3703	7.61771e-09	2.081e-07	6.68173	UP	protein_coding
PRR12	0.671164	6.3861	33.3566	7.67187e-09	2.09208e-07	6.67942	NO	protein_coding
C1S	-1.82452	8.07267	33.3341	7.76089e-09	2.11222e-07	6.67526	DOWN	protein_coding
KIF2C	3.12033	3.91769	33.331	7.77318e-09	2.11222e-07	6.67526	UP	protein_coding
MXRA8	0.791976	8.771	33.3132	7.84475e-09	2.12791e-07	6.67205	NO	protein_coding
ARHGAP33	1.13359	3.14895	33.3056	7.87567e-09	2.13253e-07	6.6711	UP	protein_coding
ADORA1	-1.7114	0.797253	33.245	8.12492e-09	2.19616e-07	6.65834	DOWN	protein_coding
TTK	2.81722	3.57107	33.203	8.30214e-09	2.2399e-07	6.64977	UP	protein_coding
TBC1D1	0.65039	6.18195	33.1998	8.31589e-09	2.2399e-07	6.64977	NO	protein_coding
H2BC9	2.22395	3.48117	33.0997	8.75522e-09	2.3492e-07	6.62908	UP	protein_coding
ACOT7	0.631311	5.53705	33.097	8.76751e-09	2.3492e-07	6.62908	NO	protein_coding
MYLIP	-1.02536	2.47523	33.0748	8.86802e-09	2.372e-07	6.62488	DOWN	protein_coding
ATP6V1A	-0.568248	7.28424	33.0696	8.8917e-09	2.37421e-07	6.62448	NO	protein_coding
CCDC102B	-2.46697	1.13833	33.0416	9.0208e-09	2.4045e-07	6.61897	DOWN	protein_coding
NCEH1	1.51748	6.24335	32.9965	9.23238e-09	2.45664e-07	6.60966	UP	protein_coding
H3C7	2.74911	3.60572	32.8529	9.94046e-09	2.63475e-07	6.57926	UP	protein_coding
RRM2	2.69799	5.6351	32.8504	9.95313e-09	2.63475e-07	6.57926	UP	protein_coding
H2BC3	3.09089	0.398181	32.8239	1.00897e-08	2.66632e-07	6.57409	UP	protein_coding
YPEL5	-0.566137	5.87966	32.7787	1.03271e-08	2.72436e-07	6.56473	NO	protein_coding
KIF15	2.63607	2.82893	32.7326	1.05746e-08	2.78489e-07	6.55519	UP	protein_coding
TMTC2	-2.04788	1.75439	32.7073	1.07133e-08	2.81658e-07	6.55028	DOWN	protein_coding
FANCD2	2.41333	3.48137	32.6968	1.07716e-08	2.8271e-07	6.54866	UP	protein_coding
TRIP13	2.21261	3.49732	32.6914	1.08017e-08	2.83015e-07	6.54819	UP	protein_coding
ZBTB34	-0.965421	4.31338	32.6137	1.12422e-08	2.94056e-07	6.53157	NO	protein_coding
ZBTB1	-0.52146	5.41545	32.5818	1.14283e-08	2.98416e-07	6.52518	NO	protein_coding
TSPAN11	-2.22601	1.58025	32.4688	1.21119e-08	3.15731e-07	6.50068	DOWN	protein_coding
C5orf24	-0.572934	6.85967	32.4599	1.21675e-08	3.16643e-07	6.49943	NO	protein_coding
HMGN2	0.984518	7.08978	32.3615	1.27998e-08	3.31974e-07	6.4789	NO	protein_coding
RPL21	-0.540919	7.79961	32.3441	1.29151e-08	3.34401e-07	6.47573	NO	protein_coding
H1.4	1.74903	4.61955	32.3368	1.29634e-08	3.35088e-07	6.47484	UP	protein_coding
H4C9	2.72507	2.16671	32.3333	1.29868e-08	3.3513e-07	6.47479	UP	protein_coding
DLGAP5	2.85741	4.17248	32.3118	1.31312e-08	3.38288e-07	6.47071	UP	protein_coding
BACH1	-0.68466	7.00205	32.2968	1.32329e-08	3.39835e-07	6.46873	NO	protein_coding
SNRPA	0.717541	4.94074	32.2965	1.32355e-08	3.39835e-07	6.46873	NO	protein_coding
KIF18B	3.14827	3.93042	32.2892	1.32852e-08	3.40543e-07	6.46783	UP	protein_coding
ARHGDIA	0.739687	8.61839	32.2147	1.38043e-08	3.53261e-07	6.4519	NO	protein_coding
TLK1	-0.586452	6.45994	32.2059	1.38673e-08	3.54283e-07	6.45065	NO	protein_coding
CENPA	2.71852	1.86582	32.1803	1.4051e-08	3.58382e-07	6.44565	UP	protein_coding
GCLC	-0.7006	5.53668	32.1502	1.42705e-08	3.63377e-07	6.43964	NO	protein_coding
TP53INP1	-1.05877	6.5683	32.1364	1.43716e-08	3.65347e-07	6.43729	DOWN	protein_coding
MAGED4	-0.930097	6.07612	32.098	1.46585e-08	3.72026e-07	6.42943	NO	protein_coding
TIMP3	-1.68838	10.0939	32.0778	1.48122e-08	3.75306e-07	6.42561	DOWN	protein_coding
FOXE1	1.62305	0.59099	32.0325	1.51617e-08	3.83531e-07	6.4162	UP	protein_coding
NAGA	0.461568	5.23409	32.0178	1.52765e-08	3.85801e-07	6.41364	NO	protein_coding
MAD2L1	2.08543	3.55809	31.9816	1.55636e-08	3.92406e-07	6.40626	UP	protein_coding
OSR1	0.735208	5.68072	31.8661	1.65177e-08	4.15781e-07	6.38114	NO	protein_coding
CCNG1	-0.710309	7.57921	31.8169	1.69415e-08	4.25058e-07	6.37155	NO	protein_coding
H4C6	1.64052	4.11508	31.7941	1.7141e-08	4.29363e-07	6.36718	UP	protein_coding
PLXNC1	-3.02011	2.92358	31.7416	1.76106e-08	4.40409e-07	6.35614	DOWN	protein_coding
NBL1	-0.912158	5.38221	31.6415	1.85427e-08	4.62214e-07	6.33516	NO	protein_coding
ASF1B	2.90893	2.00183	31.6209	1.874e-08	4.66378e-07	6.33126	UP	protein_coding
MAP2	-2.03624	1.19837	31.6113	1.88335e-08	4.67947e-07	6.3298	DOWN	protein_coding
RAB33B	-0.706033	3.61722	31.5718	1.92198e-08	4.76774e-07	6.32169	NO	protein_coding
ITGB3	-1.16577	5.60136	31.5685	1.92526e-08	4.7682e-07	6.32165	DOWN	protein_coding
CDC25C	3.02978	1.37414	31.5478	1.94588e-08	4.81152e-07	6.31772	UP	protein_coding
GXYLT2	-1.75064	4.6899	31.4992	1.99518e-08	4.92549e-07	6.30755	DOWN	protein_coding
H3C4	2.0846	4.12052	31.45	2.04639e-08	5.03575e-07	6.29794	UP	protein_coding
PCMTD2	-0.73039	4.88835	31.434	2.06338e-08	5.06944e-07	6.29504	NO	protein_coding
TGFB3	-1.4892	2.11131	31.418	2.08043e-08	5.10319e-07	6.29216	DOWN	protein_coding
ANXA1	0.783963	7.91945	31.3578	2.14594e-08	5.2555e-07	6.27939	NO	protein_coding
PLCB4	1.6017	7.50209	31.2959	2.21549e-08	5.41702e-07	6.26624	UP	protein_coding
CCNL2	-0.599215	7.42105	31.214	2.31092e-08	5.63263e-07	6.24929	NO	protein_coding
ASPM	2.75614	6.05766	31.194	2.33487e-08	5.67408e-07	6.2461	UP	protein_coding
SMAD3	-0.838369	8.07653	31.1916	2.33777e-08	5.67408e-07	6.2461	NO	protein_coding
ALAS1	-0.723091	5.55911	31.1906	2.33899e-08	5.67408e-07	6.2461	NO	protein_coding
ZSWIM4	-0.727098	4.42139	31.1816	2.34985e-08	5.69144e-07	6.24478	NO	protein_coding
EPAS1	-1.54892	9.21948	31.1499	2.38854e-08	5.77605e-07	6.23837	DOWN	protein_coding
MFSD2B	2.27063	-0.790973	31.1358	2.40588e-08	5.80886e-07	6.23591	UP	protein_coding
TAGLN2	0.635257	7.99474	31.076	2.48123e-08	5.9814e-07	6.2232	NO	protein_coding
S1PR3	-1.24738	6.75157	31.0655	2.49472e-08	6.00451e-07	6.22152	DOWN	protein_coding
NR2C1	-0.507798	4.30327	31.0483	2.51692e-08	6.04847e-07	6.21835	NO	protein_coding
DAPK2	-2.18185	-0.446073	30.8878	2.7339e-08	6.55966e-07	6.18312	DOWN	protein_coding
AZI2	-0.714548	5.40054	30.85	2.78758e-08	6.67803e-07	6.17535	NO	protein_coding
ARHGAP22	1.26883	5.66953	30.7864	2.88042e-08	6.87902e-07	6.16247	UP	protein_coding
NUF2	3.1039	2.80938	30.7704	2.90436e-08	6.91791e-07	6.16003	UP	protein_coding
H2AC21	2.32305	2.65374	30.6975	3.01557e-08	7.1684e-07	6.14458	UP	protein_coding
CEP290	0.54903	5.14808	30.673	3.05381e-08	7.24809e-07	6.13978	NO	protein_coding
CDKN2C	2.24144	2.60882	30.6142	3.14782e-08	7.45971e-07	6.12728	UP	protein_coding
AURKB	2.87789	2.9868	30.6035	3.16525e-08	7.48947e-07	6.12555	UP	protein_coding
EFR3A	-0.506165	7.20197	30.6005	3.17014e-08	7.48952e-07	6.12555	NO	protein_coding
FAM210B	-0.949476	6.37736	30.5667	3.22587e-08	7.6095e-07	6.11864	NO	protein_coding
TUBGCP2	0.40267	6.17923	30.5634	3.23126e-08	7.61053e-07	6.11859	NO	protein_coding
MCM2	1.77529	4.2949	30.5488	3.25565e-08	7.65626e-07	6.11598	UP	protein_coding
DDHD1	-0.449009	5.30403	30.5075	3.32581e-08	7.80931e-07	6.10739	NO	protein_coding
ENSG00000284946	2.32044	2.50902	30.4997	3.33926e-08	7.81531e-07	6.10705	UP	protein_coding
CEP250	0.853464	5.64601	30.4981	3.34186e-08	7.81531e-07	6.10705	NO	protein_coding
CLIC1	0.659621	8.12244	30.4971	3.34361e-08	7.81531e-07	6.10705	NO	protein_coding
FANCI	1.71002	4.46968	30.4086	3.49969e-08	8.15533e-07	6.08856	UP	protein_coding
KIAA1755	-1.93379	2.19549	30.4013	3.5129e-08	8.17373e-07	6.08758	DOWN	protein_coding
DYNC2I2	1.04752	3.6129	30.365	3.57924e-08	8.31552e-07	6.08011	UP	protein_coding
DIAPH3	1.34552	5.33619	30.36	3.58849e-08	8.32443e-07	6.07965	UP	protein_coding
EZR	1.20072	6.97725	30.3488	3.6093e-08	8.3601e-07	6.07779	UP	protein_coding
IL33	-3.46236	-0.311982	30.3355	3.63422e-08	8.40179e-07	6.07563	DOWN	protein_coding
RAD54L	2.7779	1.99684	30.3307	3.64312e-08	8.40179e-07	6.07563	UP	protein_coding
SDF2L1	1.12225	3.01359	30.3304	3.64369e-08	8.40179e-07	6.07563	UP	protein_coding
TECR	0.590437	5.50453	30.3248	3.6543e-08	8.41364e-07	6.07502	NO	protein_coding
MYDGF	0.728141	6.36696	30.3162	3.67053e-08	8.43837e-07	6.07374	NO	protein_coding
C2	-2.60673	-0.406118	30.3053	3.6912e-08	8.47323e-07	6.07195	DOWN	protein_coding
ITGA6	1.87079	7.94639	30.1945	3.90809e-08	8.95774e-07	6.0478	UP	protein_coding
ZBTB33	-0.626852	4.8978	30.1813	3.93475e-08	9.00543e-07	6.0455	NO	protein_coding
EML5	1.21961	2.339	30.1442	4.01079e-08	9.16583e-07	6.03783	UP	protein_coding
CLPTM1	0.635183	7.19927	30.1302	4.03994e-08	9.21874e-07	6.03533	NO	protein_coding
BMERB1	-0.927462	4.01187	30.0893	4.12601e-08	9.40119e-07	6.02682	NO	protein_coding
RAP2A	-0.605564	5.27365	30.0588	4.19153e-08	9.53635e-07	6.02062	NO	protein_coding
H2BC8	1.78356	3.13533	30.0292	4.2558e-08	9.66826e-07	6.01465	UP	protein_coding
ADRB2	1.77606	2.33844	30.0218	4.27224e-08	9.69131e-07	6.01362	UP	protein_coding
MEX3C	-0.510613	5.81137	29.9846	4.35481e-08	9.84957e-07	6.00658	NO	protein_coding
DHFR	1.31129	4.9499	29.9451	4.44446e-08	1.00376e-06	5.99837	UP	protein_coding
RGPD5	-0.949054	5.62226	29.8674	4.62621e-08	1.04327e-06	5.9816	NO	protein_coding
H2BC17	2.48421	3.22916	29.8225	4.73457e-08	1.06614e-06	5.97218	UP	protein_coding
SPC25	2.96261	1.38727	29.8135	4.75674e-08	1.06957e-06	5.97079	UP	protein_coding
PHF10	-0.646305	5.00968	29.8051	4.7774e-08	1.07265e-06	5.96954	NO	protein_coding
TFDP2	-0.781454	5.13279	29.793	4.80737e-08	1.07623e-06	5.96809	NO	protein_coding
MT1E	1.40887	6.40611	29.7628	4.88276e-08	1.09152e-06	5.96197	UP	protein_coding
C1orf198	-0.957658	7.18959	29.7524	4.90904e-08	1.09581e-06	5.96027	NO	protein_coding
EME1	2.2768	1.17088	29.7495	4.91623e-08	1.09582e-06	5.96026	UP	protein_coding
UBE2D1	-0.744449	3.94017	29.7164	5.00102e-08	1.11311e-06	5.95346	NO	protein_coding
ATP6V1C1	-0.472	6.05657	29.6999	5.04382e-08	1.12048e-06	5.9506	NO	protein_coding
BTAF1	-0.441117	6.32962	29.698	5.0487e-08	1.12048e-06	5.9506	NO	protein_coding
ODC1	1.17717	6.16975	29.686	5.08002e-08	1.1258e-06	5.94854	UP	protein_coding
BRCA2	2.0131	4.14556	29.6766	5.10476e-08	1.12966e-06	5.94705	UP	protein_coding
TMEM160	1.48853	1.91529	29.6389	5.20504e-08	1.15019e-06	5.93923	UP	protein_coding
RAVER1	0.600033	5.90922	29.6224	5.2494e-08	1.15833e-06	5.93617	NO	protein_coding
MSI2	-0.710604	6.1321	29.5935	5.32843e-08	1.17409e-06	5.9303	NO	protein_coding
HJURP	2.71924	4.02273	29.5815	5.36152e-08	1.17969e-06	5.92823	UP	protein_coding
TBC1D2B	-0.544263	6.5422	29.5659	5.40466e-08	1.18748e-06	5.92537	NO	protein_coding
H2BC15	1.81433	3.17745	29.5437	5.46688e-08	1.19944e-06	5.92102	UP	protein_coding
C13orf46	1.22251	2.74223	29.5101	5.56255e-08	1.21869e-06	5.91411	UP	protein_coding
H2BC6	2.31304	2.97869	29.4973	5.59937e-08	1.22501e-06	5.91186	UP	protein_coding
SKA3	2.58259	2.78808	29.3645	5.99666e-08	1.30905e-06	5.88304	UP	protein_coding
ITGAV	-0.671014	8.5826	29.3632	6.00054e-08	1.30905e-06	5.88304	NO	protein_coding
H3C10	2.0738	3.73177	29.3199	6.13621e-08	1.33676e-06	5.87395	UP	protein_coding
RIDA	-1.0858	3.11595	29.3148	6.15227e-08	1.33836e-06	5.87343	DOWN	protein_coding
CKAP2L	2.72887	3.84198	29.2274	6.43635e-08	1.39818e-06	5.85444	UP	protein_coding
ZNF436	-0.686717	4.29486	29.156	6.67775e-08	1.44653e-06	5.83967	NO	protein_coding
SURF2	1.16407	1.18787	29.1206	6.80111e-08	1.46959e-06	5.8328	UP	protein_coding
MEGF9	-0.877571	6.02992	29.1199	6.80331e-08	1.46959e-06	5.8328	NO	protein_coding
OIP5	2.92175	-0.0762812	29.0548	7.03584e-08	1.51769e-06	5.81882	UP	protein_coding
CENPI	2.01015	3.68037	29.0125	7.19122e-08	1.54903e-06	5.80994	UP	protein_coding
PLPP5	-0.606689	4.73009	28.9795	7.31499e-08	1.57349e-06	5.80314	NO	protein_coding
PRKCE	-0.732113	4.22884	28.9747	7.3328e-08	1.57512e-06	5.80269	NO	protein_coding
ZBTB44	-0.820311	5.55651	28.92	7.54309e-08	1.61671e-06	5.79137	NO	protein_coding
PNRC2	-0.474878	5.97814	28.9189	7.54744e-08	1.61671e-06	5.79137	NO	protein_coding
ELP2	-0.464753	6.54198	28.9093	7.58479e-08	1.62245e-06	5.78983	NO	protein_coding
PLEKHH2	-1.46773	4.29821	28.9058	7.59858e-08	1.62314e-06	5.78964	DOWN	protein_coding
H2BC14	3.24175	2.06061	28.8421	7.85241e-08	1.67504e-06	5.77598	UP	protein_coding
RDH10	-1.2402	6.41653	28.7887	8.07192e-08	1.71946e-06	5.76461	DOWN	protein_coding
FILIP1L	-0.690473	6.72568	28.7861	8.08304e-08	1.71946e-06	5.76461	NO	protein_coding
MED15	0.595094	6.81648	28.7509	8.23104e-08	1.74853e-06	5.75733	NO	protein_coding
EPN1	0.473706	7.26898	28.7433	8.26365e-08	1.75303e-06	5.75621	NO	protein_coding
CCDC124	0.751991	4.30187	28.7215	8.35689e-08	1.76839e-06	5.75242	NO	protein_coding
CLSPN	2.53992	4.02376	28.7211	8.35902e-08	1.76839e-06	5.75242	UP	protein_coding
RNF217	-0.572433	5.75948	28.693	8.48081e-08	1.79169e-06	5.74674	NO	protein_coding
SCAF1	0.625336	7.2677	28.6085	8.85946e-08	1.86911e-06	5.72836	NO	protein_coding
DOHH	1.00794	2.91615	28.597	8.91196e-08	1.87762e-06	5.72639	UP	protein_coding
MTFR1L	-0.364697	5.25516	28.5763	9.00789e-08	1.89523e-06	5.72234	NO	protein_coding
H2BC4	1.08436	5.11079	28.5389	9.18357e-08	1.92955e-06	5.71454	UP	protein_coding
C7	-3.10043	5.03807	28.5331	9.21103e-08	1.93268e-06	5.71384	DOWN	protein_coding
C11orf68	0.564333	5.72274	28.5197	9.27518e-08	1.94349e-06	5.71142	NO	protein_coding
HSPBP1	0.613609	4.18539	28.5009	9.36559e-08	1.95977e-06	5.7078	NO	protein_coding
GINS2	2.33286	1.945	28.481	9.4621e-08	1.97727e-06	5.70393	UP	protein_coding
F2RL2	-1.01159	7.79528	28.4335	9.69721e-08	2.02365e-06	5.69386	DOWN	protein_coding
HACD1	0.754355	3.81962	28.4147	9.79188e-08	2.04064e-06	5.69023	NO	protein_coding
TP53RK	-0.53795	4.22505	28.3933	9.90084e-08	2.06055e-06	5.68602	NO	protein_coding
STX12	-0.567018	6.05604	28.3489	1.01305e-07	2.10551e-06	5.67664	NO	protein_coding
DNLZ	1.14479	1.9839	28.3277	1.0242e-07	2.12415e-06	5.67281	UP	protein_coding
NEK2	3.20352	2.48913	28.3266	1.02479e-07	2.12415e-06	5.67281	UP	protein_coding
AP1B1	0.426355	6.70673	28.3151	1.03089e-07	2.13394e-06	5.67082	NO	protein_coding
PCDHGB1	-1.41459	3.77385	28.2612	1.06002e-07	2.19128e-06	5.6593	DOWN	protein_coding
RNF152	-0.643065	5.64955	28.2579	1.0618e-07	2.19202e-06	5.65916	NO	protein_coding
DPP9	0.581389	6.6656	28.224	1.08058e-07	2.22779e-06	5.65213	NO	protein_coding
H2AC4	2.47715	2.41667	28.2202	1.08268e-07	2.22914e-06	5.65186	UP	protein_coding
SEPTIN2	-0.424829	8.99275	28.2022	1.0928e-07	2.24696e-06	5.6484	NO	protein_coding
LRRC49	-1.06661	3.6055	28.1836	1.10335e-07	2.26563e-06	5.64481	DOWN	protein_coding
RBM48	-0.577454	3.48387	28.1639	1.11466e-07	2.28276e-06	5.64154	NO	protein_coding
MAN1C1	-1.42249	4.46352	28.1147	1.14334e-07	2.33838e-06	5.63109	DOWN	protein_coding
PDAP1	0.488062	5.75428	28.1117	1.14511e-07	2.33888e-06	5.63099	NO	protein_coding
PLEKHN1	1.5581	2.76849	28.1043	1.14953e-07	2.3448e-06	5.6299	UP	protein_coding
MYBL2	2.77471	3.28277	28.0574	1.17768e-07	2.39904e-06	5.61996	UP	protein_coding
CTSF	-1.00947	3.55253	28.0521	1.18094e-07	2.40249e-06	5.61934	DOWN	protein_coding
ACTN4	0.62119	9.81855	28.0225	1.19912e-07	2.43626e-06	5.61328	NO	protein_coding
TMEM167A	-0.534708	6.78295	28.0033	1.21106e-07	2.45727e-06	5.60955	NO	protein_coding
H2AC8	1.99546	4.61544	27.9883	1.22049e-07	2.47315e-06	5.60675	UP	protein_coding
GTF2I	-0.447911	8.04904	27.9851	1.22255e-07	2.47405e-06	5.60659	NO	protein_coding
MOB3B	-3.99638	-1.14606	27.8901	1.28407e-07	2.59173e-06	5.58641	DOWN	protein_coding
ESPL1	2.04119	3.41554	27.8624	1.3026e-07	2.62568e-06	5.58076	UP	protein_coding
PPP1R12B	-0.752009	5.37549	27.8262	1.32714e-07	2.66815e-06	5.57379	NO	protein_coding
NDUFB10	0.783218	4.57819	27.7217	1.40081e-07	2.81259e-06	5.55089	NO	protein_coding
TNFRSF10B	-0.425105	7.71311	27.7039	1.41379e-07	2.83495e-06	5.54746	NO	protein_coding
IL27RA	-0.823759	2.56878	27.6996	1.41692e-07	2.83538e-06	5.54739	NO	protein_coding
TNFRSF12A	1.15226	6.76909	27.6985	1.41769e-07	2.83538e-06	5.54739	UP	protein_coding
DCAF10	-0.486605	5.81962	27.6747	1.4353e-07	2.86687e-06	5.54259	NO	protein_coding
GIPC1	0.680104	6.29617	27.6501	1.45362e-07	2.89968e-06	5.53765	NO	protein_coding
KIF11	2.23217	5.00548	27.6476	1.4555e-07	2.89968e-06	5.53765	UP	protein_coding
RMND5A	-0.656558	4.45943	27.6046	1.48822e-07	2.95943e-06	5.52879	NO	protein_coding
PLK4	2.51412	3.14821	27.6032	1.48934e-07	2.95943e-06	5.52879	UP	protein_coding
TPM3	0.562214	8.25231	27.5809	1.50656e-07	2.98978e-06	5.52436	NO	protein_coding
ZNF3	-0.436433	4.84109	27.5737	1.51222e-07	2.99716e-06	5.52329	NO	protein_coding
SMAD5	-0.440452	6.75827	27.5477	1.53271e-07	3.03386e-06	5.51801	NO	protein_coding
NCAPG	2.72859	3.99081	27.5379	1.54046e-07	3.04527e-06	5.51637	UP	protein_coding
ALDH2	-1.0458	5.19437	27.5308	1.5461e-07	3.05251e-06	5.51534	DOWN	protein_coding
NEGR1	0.984479	5.02096	27.4959	1.57426e-07	3.10411e-06	5.50806	NO	protein_coding
VARS1	0.592697	6.8767	27.4929	1.57676e-07	3.10506e-06	5.50793	NO	protein_coding
TBXAS1	-1.45585	3.42124	27.4614	1.60263e-07	3.15197e-06	5.50142	DOWN	protein_coding
ZNF266	-0.482353	4.43059	27.4519	1.61053e-07	3.16347e-06	5.49984	NO	protein_coding
SHMT1	1.32431	2.17028	27.4464	1.61509e-07	3.16838e-06	5.49916	UP	protein_coding
H4C12	1.6659	5.65901	27.4262	1.63204e-07	3.19754e-06	5.49518	UP	protein_coding
CKS1B	1.65669	3.28815	27.419	1.63812e-07	3.20538e-06	5.49412	UP	protein_coding
GLCE	-0.612905	6.13143	27.3931	1.66019e-07	3.24443e-06	5.48886	NO	protein_coding
AJUBA	0.584235	6.46053	27.3435	1.7034e-07	3.32466e-06	5.47825	NO	protein_coding
H2BC13	2.47015	2.44072	27.3283	1.7168e-07	3.34657e-06	5.4754	UP	protein_coding
TRIB2	-0.7026	4.58943	27.3071	1.73573e-07	3.37918e-06	5.47119	NO	protein_coding
H2AC12	2.26045	3.54162	27.2682	1.77101e-07	3.4435e-06	5.463	UP	protein_coding
EIF3H	-0.416332	6.89874	27.2657	1.77333e-07	3.44366e-06	5.46298	NO	protein_coding
KIF14	2.58075	3.80614	27.2575	1.78084e-07	3.44954e-06	5.46224	UP	protein_coding
LMNB1	2.33326	4.53214	27.2537	1.78434e-07	3.45197e-06	5.46193	UP	protein_coding
HNMT	-1.43592	3.03486	27.2152	1.82018e-07	3.51688e-06	5.45384	DOWN	protein_coding
SERPINB9	-1.15972	3.08556	27.1682	1.86501e-07	3.59897e-06	5.44382	DOWN	protein_coding
STAT3	-0.558575	7.56679	27.1656	1.8675e-07	3.59926e-06	5.44379	NO	protein_coding
NUDT1	1.30473	1.54842	27.1607	1.87225e-07	3.60391e-06	5.44323	UP	protein_coding
RC3H2	-0.378199	6.58946	27.1517	1.88104e-07	3.61631e-06	5.44173	NO	protein_coding
MMP23B	-1.37791	1.87088	27.1328	1.89952e-07	3.64578e-06	5.43821	DOWN	protein_coding
CDK1	2.76748	3.82965	27.1311	1.90112e-07	3.64578e-06	5.43821	UP	protein_coding
ESYT1	0.516541	7.85062	27.1012	1.93082e-07	3.69813e-06	5.43202	NO	protein_coding
EIF3E	-0.545007	7.62849	27.0788	1.95326e-07	3.73646e-06	5.42754	NO	protein_coding
ASL	0.684438	4.4815	27.0676	1.96466e-07	3.7536e-06	5.42555	NO	protein_coding
LXN	-1.1222	3.994	27.0209	2.01266e-07	3.84053e-06	5.41561	DOWN	protein_coding
KIF22	1.70371	4.39641	26.9774	2.05846e-07	3.92307e-06	5.40637	UP	protein_coding
NCAPD2	1.15315	6.05111	26.9609	2.07609e-07	3.95177e-06	5.40321	UP	protein_coding
CDT1	2.24103	3.39625	26.937	2.10195e-07	3.99604e-06	5.39837	UP	protein_coding
PSMB6	0.719058	5.49372	26.9258	2.11423e-07	4.01442e-06	5.39638	NO	protein_coding
YAP1	-0.376053	8.11457	26.8378	2.21265e-07	4.19612e-06	5.37715	NO	protein_coding
TTC3	-0.440297	8.77646	26.8298	2.22182e-07	4.20832e-06	5.37589	NO	protein_coding
PPP5C	0.575366	5.49465	26.8122	2.24223e-07	4.24176e-06	5.37245	NO	protein_coding
APPBP2	-0.468292	6.43217	26.79	2.26804e-07	4.28531e-06	5.36802	NO	protein_coding
DIO2	-1.87779	5.97063	26.7868	2.27179e-07	4.28713e-06	5.36783	DOWN	protein_coding
GUCY1B1	-2.60061	3.36784	26.7782	2.28193e-07	4.30099e-06	5.36643	DOWN	protein_coding
RECQL4	1.69511	3.25827	26.7483	2.31754e-07	4.36275e-06	5.36024	UP	protein_coding
BCL2L11	-1.75933	1.7984	26.7223	2.34891e-07	4.41641e-06	5.35493	DOWN	protein_coding
ATMIN	-0.487548	5.82306	26.7012	2.37472e-07	4.45949e-06	5.35072	NO	protein_coding
TICRR	2.1376	3.12815	26.6944	2.38309e-07	4.46974e-06	5.34972	UP	protein_coding
NDUFB7	0.697068	4.11806	26.6598	2.42623e-07	4.54511e-06	5.34246	NO	protein_coding
MTCL3	0.973102	2.81315	26.6465	2.4429e-07	4.57078e-06	5.34001	NO	protein_coding
SSTR1	1.58169	4.15813	26.6209	2.47554e-07	4.62622e-06	5.33477	UP	protein_coding
ADD3	-0.613747	7.26182	26.5654	2.54762e-07	4.75514e-06	5.32284	NO	protein_coding
KCTD15	-0.801302	4.18722	26.558	2.55738e-07	4.76758e-06	5.3217	NO	protein_coding
CLMP	-0.747761	8.21014	26.5092	2.62285e-07	4.8837e-06	5.31125	NO	protein_coding
SIPA1L1	-0.556164	6.80791	26.4699	2.67682e-07	4.97817e-06	5.30293	NO	protein_coding
RAB8B	-0.758936	5.98447	26.4664	2.68162e-07	4.98107e-06	5.30268	NO	protein_coding
HNRNPUL2	0.399797	6.42619	26.4521	2.70161e-07	5.01216e-06	5.29997	NO	protein_coding
SLC6A17	2.15393	2.11016	26.4213	2.74491e-07	5.08634e-06	5.29359	UP	protein_coding
STOML1	0.607539	3.772	26.4135	2.75604e-07	5.10083e-06	5.29236	NO	protein_coding
MRPL12	0.810429	4.42927	26.3801	2.80417e-07	5.18366e-06	5.28536	NO	protein_coding
STAT1	-0.588036	7.86272	26.3245	2.88605e-07	5.32223e-06	5.27391	NO	protein_coding
NCAPG2	1.60529	4.72751	26.3103	2.90741e-07	5.3552e-06	5.27122	UP	protein_coding
CCNF	1.74764	4.03265	26.2715	2.96627e-07	5.45709e-06	5.26304	UP	protein_coding
TCF19	1.94686	3.70624	26.259	2.98558e-07	5.4806e-06	5.26117	UP	protein_coding
HIPK3	-0.510969	7.09584	26.2586	2.98618e-07	5.4806e-06	5.26117	NO	protein_coding
PCDHGB7	-0.60752	5.21897	26.247	3.00429e-07	5.50727e-06	5.25906	NO	protein_coding
LAMB1	-0.967393	9.12916	26.2329	3.0262e-07	5.54084e-06	5.25642	NO	protein_coding
TIMM17B	0.638052	3.60019	26.1322	3.18815e-07	5.83041e-06	5.2343	NO	protein_coding
RIN1	0.669929	5.6564	26.1183	3.21124e-07	5.86566e-06	5.23168	NO	protein_coding
TEDC1	1.91192	1.61842	26.098	3.24513e-07	5.92054e-06	5.22764	UP	protein_coding
PDCL	-0.543189	3.99333	26.082	3.27225e-07	5.96293e-06	5.22454	NO	protein_coding
UTRN	0.492612	7.7012	26.0726	3.28821e-07	5.98494e-06	5.22294	NO	protein_coding
SCARA3	0.724393	6.94593	26.0617	3.30683e-07	6.01171e-06	5.221	NO	protein_coding
CFL1	0.50239	9.17674	26.0352	3.35247e-07	6.08748e-06	5.21556	NO	protein_coding
FHL1	-1.22249	6.06034	26.0248	3.37066e-07	6.1133e-06	5.21372	DOWN	protein_coding
SIX4	-0.913817	5.82718	26.0204	3.37827e-07	6.11988e-06	5.21326	NO	protein_coding
IFNAR1	-0.527936	6.24755	26.0006	3.4131e-07	6.17571e-06	5.20931	NO	protein_coding
GATAD1	-0.579266	5.28901	25.9916	3.42902e-07	6.19722e-06	5.2078	NO	protein_coding
ANTXR1	-0.817488	8.32849	25.9798	3.45013e-07	6.22805e-06	5.20565	NO	protein_coding
SLC8A1	0.606764	6.87007	25.9746	3.45944e-07	6.23754e-06	5.20499	NO	protein_coding
MOB1A	-0.517106	7.19957	25.9458	3.51135e-07	6.32372e-06	5.19903	NO	protein_coding
PLXNA4	2.63625	0.872098	25.9266	3.54653e-07	6.37961e-06	5.19521	UP	protein_coding
PAIP2	-0.508865	4.90998	25.8398	3.70963e-07	6.66519e-06	5.17619	NO	protein_coding
PDLIM1	-0.649808	7.19394	25.7395	3.90757e-07	7.01264e-06	5.15412	NO	protein_coding
ARHGAP11A	1.59945	5.2414	25.737	3.91256e-07	7.01343e-06	5.15407	UP	protein_coding
RGS2	-1.83057	2.2976	25.641	4.11208e-07	7.35735e-06	5.13328	DOWN	protein_coding
TMSB4X	-0.662182	9.1784	25.6401	4.11399e-07	7.35735e-06	5.13328	NO	protein_coding
PSMC3IP	1.87133	1.55982	25.5856	4.23178e-07	7.5592e-06	5.12152	UP	protein_coding
GAS2L1	0.747656	4.88728	25.5357	4.34263e-07	7.73028e-06	5.1118	NO	protein_coding
SKA1	2.77962	2.8147	25.5279	4.36028e-07	7.75273e-06	5.11055	UP	protein_coding
PAMR1	-0.872878	7.02585	25.5006	4.42234e-07	7.854e-06	5.10491	NO	protein_coding
ADISSP	0.619264	4.33417	25.4673	4.49951e-07	7.98183e-06	5.0979	NO	protein_coding
MAP3K8	-1.70199	1.22575	25.4622	4.51135e-07	7.99361e-06	5.09726	DOWN	protein_coding
LRRC15	1.41888	6.76318	25.4578	4.5216e-07	8.00255e-06	5.09677	UP	protein_coding
H3.3A	-0.525415	6.28741	25.4343	4.57711e-07	8.09149e-06	5.09197	NO	protein_coding
NID1	-0.802735	7.64892	25.4243	4.60082e-07	8.12407e-06	5.09023	NO	protein_coding
HSPB7	0.997044	3.75438	25.414	4.6256e-07	8.15846e-06	5.08839	NO	protein_coding
E2F1	2.02595	2.76247	25.4057	4.64551e-07	8.18419e-06	5.08702	UP	protein_coding
MRPS28	0.801674	2.74417	25.3711	4.72939e-07	8.31572e-06	5.0801	NO	protein_coding
NCAPH	2.91545	3.10981	25.3705	4.73098e-07	8.31572e-06	5.0801	UP	protein_coding
LIG1	1.35915	4.27002	25.3282	4.83577e-07	8.49019e-06	5.07108	UP	protein_coding
H1.2	1.23444	5.63879	25.3105	4.88035e-07	8.55869e-06	5.06759	UP	protein_coding
ZBED5	-0.546285	5.04657	25.293	4.92502e-07	8.6272e-06	5.06413	NO	protein_coding
H2BC5	1.46459	3.82168	25.2895	4.93381e-07	8.63277e-06	5.06385	UP	protein_coding
EIF4B	-0.53126	8.96164	25.2757	4.96937e-07	8.6851e-06	5.06123	NO	protein_coding
IFNGR2	-0.564614	5.3956	25.2263	5.0981e-07	8.89997e-06	5.05061	NO	protein_coding
TBL1XR1	-0.628445	7.86091	25.1941	5.1841e-07	9.03985e-06	5.04384	NO	protein_coding
MAP1LC3B2	1.51468	-0.41576	25.1884	5.19932e-07	9.05611e-06	5.04306	UP	protein_coding
EIF5A	0.539878	8.5805	25.1825	5.21537e-07	9.0738e-06	5.04221	NO	protein_coding
OSBPL8	-0.471919	7.6696	25.1749	5.23597e-07	9.09392e-06	5.04125	NO	protein_coding
RAD51AP1	2.34699	1.92143	25.1739	5.23876e-07	9.09392e-06	5.04125	UP	protein_coding
GGCX	-0.403958	6.32581	25.1558	5.28812e-07	9.16926e-06	5.03767	NO	protein_coding
FKBP2	1.30691	2.39324	25.1188	5.39049e-07	9.33623e-06	5.02983	UP	protein_coding
FNTA	-0.357046	5.54026	25.0722	5.52221e-07	9.55361e-06	5.01983	NO	protein_coding
CMKLR2	1.71222	1.99734	24.9481	5.88945e-07	1.01661e-05	4.99285	UP	protein_coding
H4C11	1.72489	4.72552	24.9382	5.91979e-07	1.0207e-05	4.9911	UP	protein_coding
H2BC11	2.02634	2.77156	24.9335	5.93415e-07	1.02203e-05	4.99054	UP	protein_coding
PRKCI	-0.661184	6.74312	24.9225	5.96832e-07	1.02676e-05	4.98853	NO	protein_coding
H4C14	4.56793	3.99927	24.9178	5.98267e-07	1.02808e-05	4.98797	UP	protein_coding
RPS6KA2	-1.3518	6.07041	24.8686	6.13735e-07	1.05349e-05	4.97737	DOWN	protein_coding
PFKP	0.602426	7.32951	24.8524	6.18927e-07	1.06121e-05	4.9742	NO	protein_coding
C1R	-2.05328	7.87648	24.816	6.30731e-07	1.08025e-05	4.96648	DOWN	protein_coding
CGGBP1	-0.411352	6.24709	24.8013	6.35544e-07	1.08728e-05	4.96366	NO	protein_coding
UBE2T	1.72083	1.88588	24.7737	6.44727e-07	1.10177e-05	4.95791	UP	protein_coding
FNDC3B	-0.573731	8.48542	24.747	6.53711e-07	1.11588e-05	4.95238	NO	protein_coding
ANXA2	0.637206	10.5464	24.7389	6.56448e-07	1.11931e-05	4.95105	NO	protein_coding
PPP1R15A	0.723687	6.88405	24.7344	6.57977e-07	1.12067e-05	4.95052	NO	protein_coding
FH	0.528647	5.53403	24.7166	6.64084e-07	1.12982e-05	4.94699	NO	protein_coding
FAM117B	-1.43942	3.42995	24.7137	6.65106e-07	1.13031e-05	4.9468	DOWN	protein_coding
EDN1	1.68101	3.73539	24.6966	6.71036e-07	1.13913e-05	4.94343	UP	protein_coding
PSD3	-0.913671	6.3836	24.6686	6.80841e-07	1.1545e-05	4.93761	NO	protein_coding
CUL4A	0.301993	6.85486	24.6515	6.86911e-07	1.16351e-05	4.93423	NO	protein_coding
ZNF805	-0.478533	5.44551	24.6262	6.95985e-07	1.17759e-05	4.92901	NO	protein_coding
LHFPL2	-1.09247	5.55123	24.6027	7.04522e-07	1.19072e-05	4.92419	DOWN	protein_coding
H1.3	2.08942	4.32674	24.567	7.17696e-07	1.21165e-05	4.91662	UP	protein_coding
KCNK1	-0.810678	1.71545	24.56	7.20306e-07	1.21473e-05	4.91552	NO	protein_coding
CPE	-1.08105	3.05846	24.5407	7.27579e-07	1.22565e-05	4.91163	DOWN	protein_coding
SART1	0.793474	5.01925	24.5296	7.31759e-07	1.23134e-05	4.90962	NO	protein_coding
MCM4	1.28542	5.50869	24.5248	7.33595e-07	1.23308e-05	4.90901	UP	protein_coding
ZNF12	-0.397428	5.12876	24.5092	7.39562e-07	1.24175e-05	4.90596	NO	protein_coding
ATP5MC1	0.604729	4.21525	24.4948	7.45117e-07	1.24972e-05	4.90319	NO	protein_coding
REX1BD	0.651276	4.04001	24.4923	7.46074e-07	1.24996e-05	4.9031	NO	protein_coding
KCND2	-2.34949	-0.607203	24.4897	7.47098e-07	1.25031e-05	4.90298	DOWN	protein_coding
PFDN2	1.19164	2.80359	24.4759	7.52447e-07	1.25789e-05	4.90036	UP	protein_coding
E2F2	2.39604	0.322984	24.4419	7.65853e-07	1.27892e-05	4.89316	UP	protein_coding
REEP4	0.921848	4.07247	24.4087	7.79178e-07	1.29976e-05	4.88614	NO	protein_coding
GPBP1L1	-0.323837	6.21586	24.3843	7.89109e-07	1.3149e-05	4.88111	NO	protein_coding
TEAD3	-0.546317	6.18228	24.3677	7.95911e-07	1.3248e-05	4.87785	NO	protein_coding
ZBTB41	-0.440971	5.50983	24.3414	8.06857e-07	1.34156e-05	4.87239	NO	protein_coding
FOXL1	-0.608818	6.49733	24.2948	8.26632e-07	1.37296e-05	4.86234	NO	protein_coding
PLTP	-1.3253	5.95793	24.276	8.34736e-07	1.38382e-05	4.85892	DOWN	protein_coding
LSM4	0.680073	4.96224	24.2754	8.34969e-07	1.38382e-05	4.85892	NO	protein_coding
ADAMTSL1	1.09212	6.05476	24.2368	8.51886e-07	1.40897e-05	4.8511	UP	protein_coding
USP5	0.588213	6.53027	24.2366	8.5198e-07	1.40897e-05	4.8511	NO	protein_coding
DNAJC6	1.81268	1.07162	24.2284	8.55598e-07	1.41344e-05	4.84972	UP	protein_coding
FLNC	1.04404	11.3669	24.2119	8.62983e-07	1.42409e-05	4.84646	UP	protein_coding
SOX4	-2.17135	6.69145	24.2098	8.639e-07	1.42409e-05	4.84646	DOWN	protein_coding
NDUFB9	0.444644	4.50472	24.2054	8.65906e-07	1.42587e-05	4.84592	NO	protein_coding
PHLDB2	-1.06778	5.35454	24.1965	8.69891e-07	1.4309e-05	4.84439	DOWN	protein_coding
MFAP4	-1.70307	6.5611	24.1862	8.74585e-07	1.43708e-05	4.84252	DOWN	protein_coding
OGDH	0.614305	6.67136	24.1815	8.76717e-07	1.43905e-05	4.84192	NO	protein_coding
FANCA	2.02257	3.41361	24.1645	8.8449e-07	1.44872e-05	4.83902	UP	protein_coding
CYGB	-1.49036	3.28687	24.1409	8.95372e-07	1.46383e-05	4.83451	DOWN	protein_coding
SRPX2	-0.843464	6.46048	24.1404	8.9562e-07	1.46383e-05	4.83451	NO	protein_coding
SNRNP48	-0.44694	4.32197	24.1381	8.96701e-07	1.46404e-05	4.83445	NO	protein_coding
COL14A1	-4.21738	2.37834	24.1213	9.04561e-07	1.47531e-05	4.83112	DOWN	protein_coding
INCENP	1.34279	4.63087	24.114	9.08001e-07	1.47935e-05	4.82993	UP	protein_coding
RAD51	1.86899	1.36072	24.1073	9.11148e-07	1.48291e-05	4.82889	UP	protein_coding
FOSL1	1.21172	6.75368	24.0812	9.23555e-07	1.50151e-05	4.82347	UP	protein_coding
DACT3	-0.778369	4.026	24.0738	9.27129e-07	1.50573e-05	4.82225	NO	protein_coding
AJM1	0.895506	3.09549	24.0615	9.33087e-07	1.51381e-05	4.81993	NO	protein_coding
EIF2S3	-0.502491	7.84576	24.0528	9.37306e-07	1.51905e-05	4.81843	NO	protein_coding
ETV6	-0.79035	5.06719	24.047	9.40119e-07	1.522e-05	4.81758	NO	protein_coding
CDH4	0.760474	5.58203	24.0341	9.46451e-07	1.53064e-05	4.81513	NO	protein_coding
DNMBP	0.618435	6.55544	24.0284	9.49243e-07	1.531e-05	4.81503	NO	protein_coding
CRELD2	0.718013	4.92776	24.0276	9.49656e-07	1.531e-05	4.81503	NO	protein_coding
ERCC6L	2.69908	2.68013	23.9924	9.67181e-07	1.55762e-05	4.80754	UP	protein_coding
CILP	-4.24576	0.0623411	23.9654	9.8084e-07	1.57796e-05	4.8019	DOWN	protein_coding
CTHRC1	-0.879433	6.95729	23.9459	9.90796e-07	1.59231e-05	4.79797	NO	protein_coding
STX16	-0.363894	6.73216	23.9368	9.955e-07	1.5982e-05	4.79637	NO	protein_coding
PTGDS	-2.95742	2.60638	23.8692	1.03111e-06	1.65364e-05	4.78156	DOWN	protein_coding
SMIM14	-0.777165	5.78197	23.855	1.03874e-06	1.66414e-05	4.77881	NO	protein_coding
TTC28	-0.69038	6.43345	23.8487	1.04214e-06	1.66772e-05	4.77788	NO	protein_coding
SLTM	0.531354	5.08332	23.8468	1.04314e-06	1.66772e-05	4.77788	NO	protein_coding
PCNT	0.775499	5.6743	23.7936	1.07236e-06	1.71266e-05	4.76633	NO	protein_coding
MXD3	1.34365	1.99671	23.7842	1.07762e-06	1.71928e-05	4.76465	UP	protein_coding
BICRA	0.71892	4.6631	23.768	1.08675e-06	1.73204e-05	4.76144	NO	protein_coding
RPL34	-0.447719	7.01003	23.7629	1.0896e-06	1.73479e-05	4.76075	NO	protein_coding
RIC1	-0.444517	6.60953	23.656	1.15184e-06	1.83198e-05	4.73708	NO	protein_coding
ALYREF	0.818168	4.46991	23.6069	1.1816e-06	1.87544e-05	4.7269	NO	protein_coding
FOXN3	-0.599216	7.00775	23.5828	1.19655e-06	1.89721e-05	4.72188	NO	protein_coding
PSMD2	0.827968	8.34613	23.5708	1.20402e-06	1.90709e-05	4.71963	NO	protein_coding
MGAT5	-0.568181	7.6851	23.5593	1.21125e-06	1.91657e-05	4.71747	NO	protein_coding
COL24A1	-0.870898	3.49962	23.5538	1.21472e-06	1.92008e-05	4.71668	NO	protein_coding
SEC11C	1.02936	2.39975	23.5379	1.2248e-06	1.93402e-05	4.71354	UP	protein_coding
RNF141	-0.659389	5.42444	23.5168	1.23827e-06	1.95329e-05	4.70923	NO	protein_coding
FTSJ3	0.517115	5.43218	23.5054	1.24562e-06	1.96287e-05	4.70711	NO	protein_coding
ARHGAP5	-0.490439	7.26775	23.4915	1.25466e-06	1.97335e-05	4.7048	NO	protein_coding
MEAF6	-0.373992	5.11962	23.4912	1.25484e-06	1.97335e-05	4.7048	NO	protein_coding
SESTD1	-0.509439	4.85937	23.469	1.26945e-06	1.9899e-05	4.70117	NO	protein_coding
CDK2AP2	0.683573	3.53087	23.4676	1.27035e-06	1.9899e-05	4.70117	NO	protein_coding
BRCA1	1.74404	3.78737	23.4673	1.27053e-06	1.9899e-05	4.70117	UP	protein_coding
LACC1	-0.779365	4.18988	23.4592	1.27593e-06	1.99632e-05	4.69977	NO	protein_coding
ADAM23	-0.60471	5.38244	23.4569	1.27747e-06	1.99669e-05	4.69969	NO	protein_coding
FAM151B	-1.13533	0.34132	23.414	1.30624e-06	2.03958e-05	4.69046	DOWN	protein_coding
FRS2	-0.459328	5.60895	23.3751	1.33291e-06	2.07912e-05	4.68212	NO	protein_coding
AKR1C1	-2.04415	4.87421	23.362	1.34201e-06	2.09119e-05	4.67961	DOWN	protein_coding
LZTFL1	-0.584497	3.82219	23.3489	1.35121e-06	2.10341e-05	4.67708	NO	protein_coding
ZNF652	-0.50506	5.28898	23.286	1.39613e-06	2.17113e-05	4.66332	NO	protein_coding
FBXO32	-1.95172	5.00575	23.2801	1.40039e-06	2.17556e-05	4.66243	DOWN	protein_coding
MATN2	-1.05288	4.92526	23.2751	1.40403e-06	2.17901e-05	4.66174	DOWN	protein_coding
XPR1	-0.44471	6.67934	23.271	1.40708e-06	2.18154e-05	4.66124	NO	protein_coding
XKR8	0.653167	3.51653	23.2612	1.41421e-06	2.19039e-05	4.65948	NO	protein_coding
DOCK1	-0.405977	7.13815	23.2425	1.42808e-06	2.20964e-05	4.65568	NO	protein_coding
MRM1	0.916689	1.30637	23.2392	1.43055e-06	2.21124e-05	4.65536	NO	protein_coding
FBXO21	-0.35099	5.3112	23.2026	1.45802e-06	2.25145e-05	4.64754	NO	protein_coding
KNTC1	1.27988	4.80546	23.1939	1.4646e-06	2.25933e-05	4.64602	UP	protein_coding
ENSG00000285043	0.931712	3.07536	23.1895	1.46798e-06	2.26227e-05	4.64546	NO	protein_coding
PPP2R5A	-0.503348	4.90604	23.1865	1.47025e-06	2.26351e-05	4.64522	NO	protein_coding
MCM10	2.76625	2.61433	23.1642	1.48739e-06	2.2876e-05	4.64062	UP	protein_coding
SLC37A2	1.71113	1.74264	23.1498	1.49859e-06	2.30023e-05	4.63823	UP	protein_coding
KLC1	0.466671	7.19216	23.1476	1.50032e-06	2.3006e-05	4.63816	NO	protein_coding
PRKD3	-0.587041	6.09266	23.1209	1.52132e-06	2.33047e-05	4.63256	NO	protein_coding
GRHL1	-1.85207	-0.268916	23.1141	1.52666e-06	2.33633e-05	4.63147	DOWN	protein_coding
B3GALNT2	-0.483963	5.14931	23.0959	1.54118e-06	2.35387e-05	4.62822	NO	protein_coding
CDCA2	2.05187	4.01153	23.0681	1.56365e-06	2.3858e-05	4.62237	UP	protein_coding
PCGF3	-0.376933	5.8308	23.0557	1.57372e-06	2.3988e-05	4.62001	NO	protein_coding
IQSEC3	-1.64359	0.473078	23.0376	1.58862e-06	2.41911e-05	4.61634	DOWN	protein_coding
PLEC	0.853937	10.306	23.0285	1.59613e-06	2.42815e-05	4.61473	NO	protein_coding
VCAM1	-4.59355	5.01334	23.0183	1.60468e-06	2.43873e-05	4.61284	DOWN	protein_coding
RPS3A	-0.559991	8.5824	23.0069	1.61418e-06	2.45076e-05	4.6107	NO	protein_coding
MBNL2	-0.49474	6.63536	22.9465	1.66572e-06	2.52469e-05	4.59779	NO	protein_coding
CKAP2	1.13904	5.65631	22.946	1.66616e-06	2.52469e-05	4.59779	UP	protein_coding
PSMC5	0.476782	5.77753	22.9411	1.67044e-06	2.52829e-05	4.59717	NO	protein_coding
MT.ND5	1.80218	9.19442	22.9395	1.67183e-06	2.52829e-05	4.59717	UP	protein_coding
CENPK	1.81747	2.05563	22.897	1.70917e-06	2.58223e-05	4.58801	UP	protein_coding
HDGFL2	0.616586	5.35224	22.8875	1.71763e-06	2.59246e-05	4.58629	NO	protein_coding
PODN	-1.57013	3.86616	22.8705	1.73291e-06	2.6104e-05	4.58329	DOWN	protein_coding
CHMP1B	-0.515939	5.28784	22.8465	1.75469e-06	2.64062e-05	4.57829	NO	protein_coding
GDE1	-0.475212	6.22329	22.8328	1.76725e-06	2.65692e-05	4.57562	NO	protein_coding
BLM	2.32677	2.14735	22.8268	1.7728e-06	2.66266e-05	4.57468	UP	protein_coding
RPS6KB2	0.382382	5.04702	22.824	1.77538e-06	2.66394e-05	4.57448	NO	protein_coding
EFEMP1	-0.896296	8.4268	22.8203	1.77875e-06	2.66589e-05	4.57416	NO	protein_coding
TSPAN3	-0.482566	6.74448	22.8188	1.78015e-06	2.66589e-05	4.57416	NO	protein_coding
DOCK9	0.660216	4.96993	22.7886	1.80835e-06	2.70549e-05	4.56775	NO	protein_coding
SLC26A6	-0.690799	5.2577	22.7808	1.81567e-06	2.71313e-05	4.56653	NO	protein_coding
ST3GAL1	-0.951464	6.83924	22.7794	1.81698e-06	2.71313e-05	4.56653	NO	protein_coding
ADAM10	-0.572599	8.40592	22.7705	1.82546e-06	2.72314e-05	4.56493	NO	protein_coding
ACP1	-0.413113	5.40914	22.7626	1.83296e-06	2.73168e-05	4.56357	NO	protein_coding
MLXIP	-0.639037	6.30746	22.7382	1.85636e-06	2.76387e-05	4.55848	NO	protein_coding
VAMP4	-0.691836	4.92029	22.723	1.87117e-06	2.78054e-05	4.55587	NO	protein_coding
CFAP298	0.681144	3.15838	22.7122	1.88167e-06	2.79344e-05	4.55386	NO	protein_coding
MCM3	1.30923	4.53464	22.7008	1.89286e-06	2.80735e-05	4.5517	UP	protein_coding
KIAA0930	-0.749757	6.04581	22.6811	1.91238e-06	2.83356e-05	4.54767	NO	protein_coding
NEPRO	-0.461751	5.00647	22.6583	1.93526e-06	2.86194e-05	4.54334	NO	protein_coding
EIPR1	0.487906	3.38927	22.6185	1.97577e-06	2.91906e-05	4.53476	NO	protein_coding
TRIQK	-0.583242	4.20119	22.6118	1.98261e-06	2.92635e-05	4.53367	NO	protein_coding
TENT2	-0.399122	5.35415	22.6072	1.98734e-06	2.93051e-05	4.53306	NO	protein_coding
UHRF1	1.48725	5.87345	22.5868	2.0086e-06	2.9562e-05	4.52927	UP	protein_coding
CDCA5	2.22858	3.26861	22.5747	2.02128e-06	2.97201e-05	4.52695	UP	protein_coding
MAP3K5	-0.753026	6.05865	22.568	2.02837e-06	2.97959e-05	4.52584	NO	protein_coding
CDC45	2.41787	1.96968	22.5461	2.05158e-06	3.01082e-05	4.52132	UP	protein_coding
UBTD2	-0.603898	4.74828	22.5294	2.06956e-06	3.0343e-05	4.51794	NO	protein_coding
ZC3H18	0.442566	5.5457	22.5106	2.08988e-06	3.06118e-05	4.51411	NO	protein_coding
SNRPN	-0.541099	5.4032	22.5066	2.09428e-06	3.0647e-05	4.51361	NO	protein_coding
H4C3	1.68286	3.70481	22.4752	2.12874e-06	3.11218e-05	4.50694	UP	protein_coding
TNK2	0.521726	5.62432	22.47	2.13455e-06	3.115e-05	4.50654	NO	protein_coding
DBF4B	1.35442	3.16135	22.4698	2.13472e-06	3.115e-05	4.50654	UP	protein_coding
CHAF1A	1.39131	3.78019	22.4565	2.14962e-06	3.13376e-05	4.50393	UP	protein_coding
RRM1	1.0035	6.11069	22.4474	2.15973e-06	3.14551e-05	4.50231	UP	protein_coding
NSD2	1.033	6.83466	22.4387	2.1696e-06	3.1569e-05	4.50074	UP	protein_coding
ZNF426	-0.466753	4.93312	22.3977	2.21641e-06	3.21952e-05	4.49221	NO	protein_coding
MYO7B	3.87518	-1.08182	22.3973	2.21682e-06	3.21952e-05	4.49221	UP	protein_coding
MAP4K3	-0.626289	6.21086	22.3785	2.23865e-06	3.24816e-05	4.48836	NO	protein_coding
DTYMK	0.96608	3.63453	22.3441	2.27918e-06	3.30384e-05	4.48098	NO	protein_coding
CARNMT1	-0.61014	4.97266	22.3263	2.30034e-06	3.32866e-05	4.47773	NO	protein_coding
TXLNB	-2.31503	-0.302215	22.3261	2.30063e-06	3.32866e-05	4.47773	DOWN	protein_coding
RLF	-0.503011	5.13559	22.2989	2.3334e-06	3.3729e-05	4.472	NO	protein_coding
MYO18A	0.505356	7.14761	22.2885	2.34607e-06	3.38764e-05	4.4701	NO	protein_coding
GYS1	0.736785	6.41725	22.2869	2.348e-06	3.38764e-05	4.4701	NO	protein_coding
USPL1	-0.457004	4.34171	22.2704	2.36826e-06	3.41367e-05	4.46678	NO	protein_coding
NPIPB4	0.999053	3.6675	22.2616	2.37913e-06	3.42613e-05	4.4652	NO	protein_coding
SPATA13	-0.853155	5.9621	22.1863	2.47436e-06	3.55993e-05	4.44856	NO	protein_coding
TIPARP	0.887255	6.13369	22.1752	2.4887e-06	3.57721e-05	4.44646	NO	protein_coding
CDR2	-0.798201	5.13062	22.1724	2.49233e-06	3.57909e-05	4.44623	NO	protein_coding
TGM2	-0.930634	8.57658	22.1695	2.49603e-06	3.58105e-05	4.44599	NO	protein_coding
CLEC11A	0.865354	6.52275	22.1545	2.51571e-06	3.60593e-05	4.44298	NO	protein_coding
RPS6KA3	-0.401682	6.45274	22.1399	2.53487e-06	3.63001e-05	4.44009	NO	protein_coding
H1.1	1.99721	2.28629	22.1244	2.55545e-06	3.65502e-05	4.43711	UP	protein_coding
MMP1	1.63381	7.53272	22.1231	2.55709e-06	3.65502e-05	4.43711	UP	protein_coding
BCL7C	0.601828	4.84004	22.081	2.61384e-06	3.73267e-05	4.42798	NO	protein_coding
KIF24	2.17905	1.7194	22.0778	2.61815e-06	3.73536e-05	4.42767	UP	protein_coding
ENTPD6	0.57617	5.6488	22.0568	2.64697e-06	3.77297e-05	4.42332	NO	protein_coding
RPS4X	-0.500405	8.24215	22.0545	2.65013e-06	3.77398e-05	4.4232	NO	protein_coding
SUDS3	-0.342829	5.69735	22.0456	2.66246e-06	3.78804e-05	4.42159	NO	protein_coding
TIMM13	0.581901	4.19609	22.0348	2.67758e-06	3.80602e-05	4.41953	NO	protein_coding
SMIM13	-0.526084	5.12776	22.0245	2.69189e-06	3.82283e-05	4.41761	NO	protein_coding
KANK2	-0.379994	7.6288	22.0136	2.70728e-06	3.84114e-05	4.41554	NO	protein_coding
CLK1	-0.896766	5.49468	21.9712	2.76769e-06	3.92323e-05	4.40636	NO	protein_coding
C21orf91	-0.623142	4.18317	21.967	2.77382e-06	3.92831e-05	4.40579	NO	protein_coding
SLC4A8	0.723923	3.8448	21.9367	2.81797e-06	3.98716e-05	4.39934	NO	protein_coding
KCNK12	4.82261	0.427472	21.9299	2.82794e-06	3.99759e-05	4.3982	UP	protein_coding
FBXO30	-0.408504	5.82699	21.924	2.83671e-06	4.0015e-05	4.39778	NO	protein_coding
GPR153	-0.571084	4.11909	21.9235	2.8374e-06	4.0015e-05	4.39778	NO	protein_coding
DTL	2.52213	3.65218	21.9227	2.83852e-06	4.0015e-05	4.39778	UP	protein_coding
WSB1	-0.737352	7.77443	21.8984	2.87469e-06	4.04879e-05	4.39267	NO	protein_coding
GABARAPL1	-0.939805	6.62944	21.8858	2.89365e-06	4.06958e-05	4.39045	NO	protein_coding
LEO1	0.737263	3.51101	21.8851	2.89475e-06	4.06958e-05	4.39045	NO	protein_coding
KRT8	-0.814154	4.04225	21.8783	2.90496e-06	4.0802e-05	4.38932	NO	protein_coding
ABCC1	-0.704624	8.45082	21.8678	2.92092e-06	4.09888e-05	4.38733	NO	protein_coding
NAB1	-0.523773	5.15878	21.8595	2.93366e-06	4.11103e-05	4.38605	NO	protein_coding
ATAD2	1.3535	5.18427	21.8586	2.93492e-06	4.11103e-05	4.38605	UP	protein_coding
THSD4	-0.975503	8.1948	21.8549	2.94061e-06	4.11525e-05	4.3856	NO	protein_coding
MT.ATP6	1.5267	8.65823	21.8265	2.98445e-06	4.17072e-05	4.37979	UP	protein_coding
STAT2	-0.707128	7.64538	21.8257	2.98567e-06	4.17072e-05	4.37979	NO	protein_coding
LAMA5	-1.35662	6.90325	21.8213	2.99259e-06	4.17659e-05	4.37918	DOWN	protein_coding
ARPC1B	0.60852	6.57419	21.7782	3.06059e-06	4.26762e-05	4.36981	NO	protein_coding
UST	-0.650124	4.96518	21.7669	3.07868e-06	4.28896e-05	4.36765	NO	protein_coding
INMT	-1.52054	2.82962	21.7558	3.09645e-06	4.30981e-05	4.36554	DOWN	protein_coding
CACNA1H	-1.63527	1.506	21.7382	3.12501e-06	4.34563e-05	4.36195	DOWN	protein_coding
MRPL41	0.788566	4.01547	21.7075	3.1755e-06	4.41185e-05	4.35538	NO	protein_coding
VPS25	0.459424	4.56987	21.6682	3.24116e-06	4.499e-05	4.34688	NO	protein_coding
EBNA1BP2	0.677211	4.77636	21.6639	3.24852e-06	4.50516e-05	4.34629	NO	protein_coding
CAB39L	-0.581638	3.62777	21.6583	3.25803e-06	4.51427e-05	4.34541	NO	protein_coding
ZNF695	2.5229	-0.109282	21.6016	3.35565e-06	4.6402e-05	4.33346	UP	protein_coding
PCMTD1	-0.903224	5.52456	21.6007	3.35727e-06	4.6402e-05	4.33346	NO	protein_coding
ZNF260	-0.560524	5.00164	21.6003	3.35796e-06	4.6402e-05	4.33346	NO	protein_coding
TBCD	0.466592	5.99198	21.5843	3.38613e-06	4.67493e-05	4.33022	NO	protein_coding
MELK	1.56722	4.09687	21.5802	3.39342e-06	4.68078e-05	4.32968	UP	protein_coding
STAM2	-0.350426	5.94672	21.56	3.42933e-06	4.72186e-05	4.32589	NO	protein_coding
FBRS	0.4134	6.52029	21.5384	3.46805e-06	4.7709e-05	4.3214	NO	protein_coding
RHOBTB3	-1.07716	8.30153	21.5141	3.51246e-06	4.82336e-05	4.31665	DOWN	protein_coding
ESCO2	2.67124	1.97515	21.4754	3.58393e-06	4.91711e-05	4.30829	UP	protein_coding
RELL2	1.00639	1.84051	21.4704	3.59328e-06	4.92555e-05	4.30755	UP	protein_coding
CCDC18	1.17943	2.93948	21.463	3.60731e-06	4.94037e-05	4.30624	UP	protein_coding
REXO5	1.24985	1.61627	21.4582	3.61634e-06	4.94834e-05	4.30554	UP	protein_coding
RAB9A	-0.573192	3.62688	21.4316	3.6668e-06	5.01292e-05	4.29991	NO	protein_coding
GUCY1A1	-4.4939	1.59599	21.4167	3.69535e-06	5.04747e-05	4.29693	DOWN	protein_coding
CDH2	0.956426	6.54094	21.4091	3.71009e-06	5.06311e-05	4.29558	NO	protein_coding
CYC1	0.588095	5.22095	21.4031	3.72168e-06	5.07442e-05	4.29461	NO	protein_coding
RPL17.C18orf32	-0.790871	4.11945	21.3966	3.73437e-06	5.08721e-05	4.29352	NO	protein_coding
EI24	-0.419187	6.36069	21.3915	3.7442e-06	5.09608e-05	4.29276	NO	protein_coding
KLF3	-0.621631	5.99375	21.3858	3.75546e-06	5.10689e-05	4.29184	NO	protein_coding
FAM131B	-0.984044	2.1966	21.3839	3.75912e-06	5.10706e-05	4.29183	NO	protein_coding
RGPD6	1.19392	5.2314	21.3823	3.76222e-06	5.10706e-05	4.29183	UP	protein_coding
LIFR	-0.826652	6.18183	21.3567	3.81291e-06	5.17073e-05	4.28645	NO	protein_coding
CYRIA	-0.819884	3.3052	21.3552	3.81585e-06	5.17073e-05	4.28645	NO	protein_coding
BNIP2	-0.334952	6.48326	21.2587	4.01289e-06	5.42817e-05	4.26535	NO	protein_coding
RPL39L	1.35062	1.03837	21.251	4.02905e-06	5.44523e-05	4.26398	UP	protein_coding
SH3BGRL3	1.09449	7.75068	21.2484	4.03445e-06	5.44775e-05	4.26378	UP	protein_coding
SSRP1	0.656036	6.21711	21.2439	4.04389e-06	5.4557e-05	4.26315	NO	protein_coding
CACNA1G	-1.92368	0.423847	21.234	4.06492e-06	5.47926e-05	4.26128	DOWN	protein_coding
ZNF84	-0.510211	4.88842	21.2284	4.07684e-06	5.49053e-05	4.26039	NO	protein_coding
NTHL1	0.797592	2.23329	21.2057	4.12526e-06	5.55087e-05	4.25564	NO	protein_coding
ELOVL1	0.632443	6.30105	21.1612	4.22223e-06	5.67639e-05	4.24593	NO	protein_coding
NT5C2	-0.392082	6.97789	21.1477	4.25216e-06	5.71163e-05	4.24324	NO	protein_coding
MRPL4	0.533708	4.72093	21.1329	4.28513e-06	5.7509e-05	4.24026	NO	protein_coding
SVEP1	-1.57245	8.18693	21.1277	4.29672e-06	5.76142e-05	4.23947	DOWN	protein_coding
KCNH2	-3.83993	0.039605	21.1156	4.32403e-06	5.793e-05	4.2371	DOWN	protein_coding
TNS3	-0.793001	8.91947	21.107	4.34336e-06	5.8137e-05	4.23555	NO	protein_coding
C11orf98	0.904135	3.12014	21.1054	4.34705e-06	5.8137e-05	4.23555	NO	protein_coding
ATP1B1	0.823576	5.54647	21.0919	4.37779e-06	5.84973e-05	4.23286	NO	protein_coding
CYTL1	-1.98307	1.27296	21.0716	4.42437e-06	5.90172e-05	4.22902	DOWN	protein_coding
PIAS2	-0.430561	5.30009	21.0633	4.44361e-06	5.92225e-05	4.22751	NO	protein_coding
LIMD1	-0.446573	6.85842	21.0509	4.47246e-06	5.95039e-05	4.22545	NO	protein_coding
GRIK2	0.734933	4.79964	21.0369	4.50519e-06	5.98875e-05	4.22266	NO	protein_coding
CMSS1	1.06311	2.37841	20.9915	4.61332e-06	6.12719e-05	4.21274	UP	protein_coding
NOC4L	0.746846	3.7864	20.9863	4.62568e-06	6.1383e-05	4.21195	NO	protein_coding
LMNB2	0.798574	6.88881	20.9091	4.8161e-06	6.38548e-05	4.19481	NO	protein_coding
RAB42	-1.86616	0.0572959	20.8707	4.91361e-06	6.50356e-05	4.18685	DOWN	protein_coding
CCHCR1	0.497082	3.69087	20.8676	4.92154e-06	6.50845e-05	4.18652	NO	protein_coding
PRRC1	-0.443397	7.08549	20.8526	4.96006e-06	6.55375e-05	4.18351	NO	protein_coding
DSTN	-0.426302	7.65554	20.8435	4.98385e-06	6.57954e-05	4.1818	NO	protein_coding
SSPN	-0.690182	4.32692	20.8273	5.02625e-06	6.62982e-05	4.1785	NO	protein_coding
SNED1	-1.20044	3.37542	20.8213	5.04183e-06	6.64468e-05	4.17753	DOWN	protein_coding
RRAGB	-0.695084	3.23615	20.8151	5.05825e-06	6.6606e-05	4.17649	NO	protein_coding
SULT1A1	-1.70108	-0.430541	20.8108	5.06955e-06	6.66978e-05	4.17589	DOWN	protein_coding
DEPDC1B	2.10421	1.44758	20.7866	5.13408e-06	6.74054e-05	4.17131	UP	protein_coding
SLC2A9	-1.6818	-0.128881	20.7857	5.13649e-06	6.74054e-05	4.17131	DOWN	protein_coding
KIFC3	0.709963	5.65377	20.7835	5.14231e-06	6.74243e-05	4.17118	NO	protein_coding
IER5	0.509412	6.05787	20.7584	5.21014e-06	6.82554e-05	4.16586	NO	protein_coding
ZNF570	-0.685515	2.90035	20.7534	5.22396e-06	6.83218e-05	4.16544	NO	protein_coding
TMEM230	-0.451172	6.11271	20.7533	5.22408e-06	6.83218e-05	4.16544	NO	protein_coding
POLE4	0.633432	2.90776	20.6895	5.40116e-06	7.05776e-05	4.15133	NO	protein_coding
TMED2	-0.468764	8.14001	20.6825	5.421e-06	7.07141e-05	4.15049	NO	protein_coding
SNF8	0.447971	4.43503	20.6809	5.4254e-06	7.07141e-05	4.15049	NO	protein_coding
ZNF106	-0.604772	8.37277	20.6776	5.43471e-06	7.07755e-05	4.15012	NO	protein_coding
TYMS	1.20926	5.08842	20.6522	5.50745e-06	7.16621e-05	4.14471	UP	protein_coding
CCT5	0.6204	7.02926	20.6377	5.54917e-06	7.21438e-05	4.1418	NO	protein_coding
CEP128	1.80816	2.70035	20.6043	5.64698e-06	7.33535e-05	4.13458	UP	protein_coding
MRPL23	0.61613	3.99196	20.5937	5.67824e-06	7.36973e-05	4.13255	NO	protein_coding
PHETA2	-0.568467	3.25421	20.5821	5.71267e-06	7.40192e-05	4.13066	NO	protein_coding
URGCP	0.411741	5.3193	20.5761	5.73071e-06	7.41905e-05	4.12965	NO	protein_coding
ANGPT1	-0.726158	6.42922	20.5712	5.74529e-06	7.43167e-05	4.12891	NO	protein_coding
SGO1	2.61088	1.84728	20.5626	5.7713e-06	7.45905e-05	4.12732	UP	protein_coding
ABCC6	-1.51692	0.271255	20.5517	5.8042e-06	7.48984e-05	4.12553	DOWN	protein_coding
RBM10	0.371454	5.66503	20.5515	5.80487e-06	7.48984e-05	4.12553	NO	protein_coding
LITAF	-0.886421	6.82298	20.536	5.85201e-06	7.54433e-05	4.12238	NO	protein_coding
TEDC2	1.4561	1.22064	20.5036	5.95202e-06	7.66684e-05	4.11538	UP	protein_coding
ZDHHC4	-0.540104	3.85878	20.4999	5.96342e-06	7.66868e-05	4.11528	NO	protein_coding
ZNF564	-0.663869	2.93684	20.4909	5.99153e-06	7.6984e-05	4.1136	NO	protein_coding
MARCKSL1	-0.950232	6.3198	20.4806	6.02397e-06	7.72831e-05	4.11192	NO	protein_coding
PPP1R14B	0.825614	6.0454	20.4803	6.02486e-06	7.72831e-05	4.11192	NO	protein_coding
TRPA1	-2.25156	7.20635	20.4756	6.03956e-06	7.74071e-05	4.11122	DOWN	protein_coding
PDGFRA	-1.17504	8.58207	20.4655	6.07172e-06	7.77544e-05	4.10928	DOWN	protein_coding
ICAM1	-1.25283	6.6439	20.4343	6.17142e-06	7.89654e-05	4.10256	DOWN	protein_coding
XRCC2	2.09028	1.97609	20.4324	6.17755e-06	7.89781e-05	4.10249	UP	protein_coding
PTK7	-0.810171	8.39493	20.399	6.28621e-06	8.03006e-05	4.09528	NO	protein_coding
DEPP1	-1.71542	4.41769	20.3737	6.37003e-06	8.13038e-05	4.08989	DOWN	protein_coding
NMD3	-0.33495	5.86665	20.3604	6.41429e-06	8.18009e-05	4.08724	NO	protein_coding
CABLES1	-1.00078	4.34843	20.3495	6.45106e-06	8.22015e-05	4.08512	DOWN	protein_coding
PSRC1	1.06053	3.38477	20.3377	6.4909e-06	8.26408e-05	4.08281	UP	protein_coding
ATG13	-0.435107	6.2369	20.3318	6.51078e-06	8.28254e-05	4.08184	NO	protein_coding
LTBP3	-0.641418	7.30153	20.3215	6.54614e-06	8.32063e-05	4.07984	NO	protein_coding
ST3GAL5	-0.877695	3.42438	20.2807	6.68712e-06	8.49281e-05	4.07095	NO	protein_coding
CRIPT	-0.684257	4.54626	20.2653	6.74107e-06	8.55427e-05	4.06782	NO	protein_coding
RCBTB1	-0.395438	5.23874	20.2438	6.81735e-06	8.64393e-05	4.06329	NO	protein_coding
IGFBP2	-2.25493	3.7334	20.2274	6.8762e-06	8.71137e-05	4.05991	DOWN	protein_coding
DNAJC18	-0.537301	4.16175	20.2155	6.91898e-06	8.75834e-05	4.05758	NO	protein_coding
CAVIN1	0.687097	10.2461	20.2124	6.93021e-06	8.76535e-05	4.05723	NO	protein_coding
SMC4	1.21766	6.49503	20.2033	6.9631e-06	8.79402e-05	4.05581	UP	protein_coding
BDKRB2	-1.66517	6.74831	20.203	6.96431e-06	8.79402e-05	4.05581	DOWN	protein_coding
TDP2	-0.552904	5.14678	20.1993	6.97789e-06	8.80393e-05	4.05532	NO	protein_coding
SLC25A37	-0.464661	6.15063	20.1976	6.98398e-06	8.80439e-05	4.0553	NO	protein_coding
SYNM	0.919452	3.61	20.1773	7.05867e-06	8.88745e-05	4.05122	NO	protein_coding
DNASE1L1	0.565913	5.13191	20.1765	7.06142e-06	8.88745e-05	4.05122	NO	protein_coding
AGAP1	-0.48212	5.3641	20.1744	7.06937e-06	8.88752e-05	4.05122	NO	protein_coding
KLF9	-1.10866	4.59802	20.1734	7.07303e-06	8.88752e-05	4.05122	DOWN	protein_coding
PTPN12	-0.392972	6.69531	20.1582	7.12942e-06	8.95106e-05	4.04813	NO	protein_coding
PPP1CA	0.47789	5.8687	20.1429	7.18659e-06	9.01547e-05	4.04501	NO	protein_coding
CDC6	1.97979	3.19582	20.1273	7.24541e-06	9.08185e-05	4.04183	UP	protein_coding
BABAM1	0.445749	5.21396	20.1204	7.27153e-06	9.10717e-05	4.04062	NO	protein_coding
ATP5IF1	0.806262	4.036	20.0975	7.35928e-06	9.20958e-05	4.03576	NO	protein_coding
GPNMB	-1.28556	5.00382	20.0719	7.45828e-06	9.32588e-05	4.03031	DOWN	protein_coding
YWHAH	0.546751	6.22709	20.0556	7.52228e-06	9.39827e-05	4.02695	NO	protein_coding
SF3B4	0.637219	5.70745	20.0263	7.63852e-06	9.52801e-05	4.021	NO	protein_coding
PEF1	0.338057	4.96746	20.0181	7.67122e-06	9.56106e-05	4.01949	NO	protein_coding
TLCD4	-1.46491	2.18263	20.0162	7.67872e-06	9.56265e-05	4.01942	DOWN	protein_coding
BORA	1.29436	2.16157	20.0065	7.71808e-06	9.60388e-05	4.01755	UP	protein_coding
DRAM2	-0.580198	4.40869	19.9876	7.79457e-06	9.69122e-05	4.01362	NO	protein_coding
CACNB3	-0.58681	5.04247	19.9837	7.81066e-06	9.70338e-05	4.01308	NO	protein_coding
SEC23IP	-0.339579	6.55482	19.9785	7.83184e-06	9.72185e-05	4.01225	NO	protein_coding
NDUFS6	0.954366	3.53467	19.9732	7.8537e-06	9.74112e-05	4.01139	NO	protein_coding
ALDH16A1	0.786342	3.30488	19.9187	8.08045e-06	0.000100143	3.99938	NO	protein_coding
AAMDC	1.07649	1.79821	19.9075	8.12823e-06	0.000100611	3.99735	UP	protein_coding
CHTF18	1.55028	3.58161	19.9067	8.13132e-06	0.000100611	3.99735	UP	protein_coding
UQCRHL	1.62481	-0.346776	19.9031	8.14693e-06	0.000100723	3.99687	UP	protein_coding
ZNF555	-0.629177	3.02151	19.884	8.22864e-06	0.000101652	3.99289	NO	protein_coding
TMED8	-0.445906	4.01778	19.8769	8.25935e-06	0.000101949	3.99162	NO	protein_coding
NT5E	0.818033	9.45695	19.871	8.28475e-06	0.000102181	3.99063	NO	protein_coding
ZNF230	-0.746692	1.60989	19.8672	8.30115e-06	0.000102301	3.99012	NO	protein_coding
SMAD1	-1.34761	4.03305	19.8426	8.40882e-06	0.000103545	3.98487	DOWN	protein_coding
ZNF616	-0.583384	3.74162	19.8392	8.42357e-06	0.000103644	3.98446	NO	protein_coding
EIF5A2	-0.544786	5.23125	19.817	8.52222e-06	0.000104774	3.97975	NO	protein_coding
PSMC1	0.486474	5.88117	19.8139	8.5361e-06	0.00010486	3.97939	NO	protein_coding
TUBA1B	0.687738	9.80127	19.8097	8.55463e-06	0.000105004	3.97879	NO	protein_coding
CMBL	-0.610681	5.05822	19.8076	8.56427e-06	0.000105039	3.97865	NO	protein_coding
RTL3	2.06722	-0.253657	19.7803	8.68714e-06	0.000106461	3.97281	UP	protein_coding
POSTN	-2.57935	7.36878	19.774	8.71616e-06	0.000106731	3.97171	DOWN	protein_coding
PRIM1	1.72584	1.2409	19.7275	8.93055e-06	0.00010927	3.9615	UP	protein_coding
RALY	0.472741	6.03294	19.7222	8.95545e-06	0.000109487	3.96064	NO	protein_coding
SRSF5	-0.433871	6.78939	19.7158	8.98535e-06	0.000109689	3.95984	NO	protein_coding
SMAP2	0.547597	5.64767	19.7157	8.98621e-06	0.000109689	3.95984	NO	protein_coding
CUTA	0.478794	6.23765	19.7073	9.02554e-06	0.000110082	3.95829	NO	protein_coding
ANKRD52	0.589386	7.67505	19.6989	9.06515e-06	0.000110389	3.95707	NO	protein_coding
CADM4	-1.00645	2.08724	19.694	9.08872e-06	0.000110589	3.95629	DOWN	protein_coding
PRKCD	0.499638	4.64558	19.6869	9.1225e-06	0.000110912	3.95502	NO	protein_coding
HEPH	-0.978606	4.39869	19.6791	9.15957e-06	0.000111275	3.9536	NO	protein_coding
IPCEF1	-2.27434	-0.672047	19.6593	9.2551e-06	0.000112347	3.94944	DOWN	protein_coding
PGM3	-0.339593	7.17698	19.649	9.30532e-06	0.000112778	3.94777	NO	protein_coding
SH3BGRL	-0.526001	5.94043	19.6442	9.32841e-06	0.000112969	3.94704	NO	protein_coding
MDM2	-0.693726	8.77702	19.6357	9.37037e-06	0.000113388	3.94543	NO	protein_coding
SPTAN1	0.444239	9.47094	19.6288	9.40409e-06	0.000113707	3.94421	NO	protein_coding
H2BC10	2.07444	3.14132	19.6272	9.4122e-06	0.000113715	3.94418	UP	protein_coding
PGM2	0.610505	4.89819	19.6213	9.44117e-06	0.000113976	3.94319	NO	protein_coding
GRAMD1B	1.08325	4.62784	19.6073	9.51071e-06	0.000114725	3.94034	UP	protein_coding
C1QL1	-2.00026	0.510558	19.5886	9.60396e-06	0.000115759	3.93644	DOWN	protein_coding
C7orf50	0.6926	4.87269	19.566	9.71856e-06	0.000117049	3.93163	NO	protein_coding
SLC35E4	0.753968	3.29777	19.5605	9.74622e-06	0.00011729	3.93074	NO	protein_coding
TTC14	-0.421061	5.91986	19.548	9.81057e-06	0.000117972	3.92822	NO	protein_coding
SLC25A11	0.349269	4.62915	19.5193	9.95866e-06	0.00011966	3.92205	NO	protein_coding
RIPOR3	-1.64661	4.63894	19.489	1.01182e-05	0.000121387	3.91583	DOWN	protein_coding
LIPE	1.14329	1.1418	19.4769	1.01824e-05	0.000122061	3.91342	UP	protein_coding
PTGR3	-0.58737	4.72375	19.4469	1.03437e-05	0.000123898	3.90693	NO	protein_coding
LRRC57	-0.385125	4.67416	19.4399	1.03816e-05	0.000124256	3.90568	NO	protein_coding
COPE	0.503039	6.31788	19.4304	1.04336e-05	0.000124746	3.90397	NO	protein_coding
DZIP1	-0.539223	5.94256	19.4294	1.04388e-05	0.000124746	3.90397	NO	protein_coding
SLC2A4RG	0.655592	5.82078	19.3947	1.06303e-05	0.000126936	3.89641	NO	protein_coding
SNX15	0.515503	3.86092	19.3732	1.07504e-05	0.000128184	3.89216	NO	protein_coding
TTC17	-0.41548	6.67099	19.373	1.07515e-05	0.000128184	3.89216	NO	protein_coding
STIL	1.51596	3.8905	19.3467	1.09007e-05	0.000129831	3.88662	UP	protein_coding
MTHFD1	0.618779	5.80741	19.3457	1.09065e-05	0.000129831	3.88662	NO	protein_coding
NIN	0.454239	7.01662	19.3377	1.09521e-05	0.000130274	3.88514	NO	protein_coding
GNAQ	-0.336276	6.81546	19.3255	1.10224e-05	0.000131009	3.8827	NO	protein_coding
GALNT6	0.796051	6.02667	19.3237	1.10331e-05	0.000131034	3.88262	NO	protein_coding
THEMIS2	-0.953985	2.11033	19.3185	1.1063e-05	0.000131288	3.88177	NO	protein_coding
PEX13	-0.321756	4.70499	19.3043	1.11457e-05	0.000132167	3.87888	NO	protein_coding
ZNF185	1.68252	4.13022	19.3012	1.11637e-05	0.000132278	3.87851	UP	protein_coding
CDC73	-0.295704	6.13503	19.2877	1.12426e-05	0.000133008	3.87612	NO	protein_coding
RPS4Y1	-0.40811	6.74278	19.2773	1.13042e-05	0.000133634	3.87408	NO	protein_coding
NOC2L	0.590345	6.40828	19.1989	1.17782e-05	0.000138811	3.85758	NO	protein_coding
BTG2	-0.981363	5.27316	19.1913	1.18252e-05	0.000139259	3.85618	NO	protein_coding
TPGS1	0.938369	2.58677	19.189	1.18396e-05	0.000139321	3.85598	NO	protein_coding
NUDC	0.675926	4.96018	19.1728	1.194e-05	0.000140395	3.85265	NO	protein_coding
RAB5A	-0.431822	5.83713	19.1685	1.19673e-05	0.000140555	3.85215	NO	protein_coding
SGO2	1.55758	4.35162	19.1678	1.19719e-05	0.000140555	3.85215	UP	protein_coding
NAA50	-0.484113	7.14052	19.1631	1.20008e-05	0.000140682	3.85176	NO	protein_coding
EIF1B	-0.542018	4.44229	19.1631	1.2001e-05	0.000140682	3.85176	NO	protein_coding
RELB	-0.665429	4.42665	19.146	1.21092e-05	0.000141641	3.84881	NO	protein_coding
TGFBR1	-1.23899	6.46903	19.1458	1.21104e-05	0.000141641	3.84881	DOWN	protein_coding
FKBP14	-0.452087	6.54184	19.1291	1.22165e-05	0.000142629	3.84579	NO	protein_coding
RBL1	1.35722	3.65086	19.1282	1.22227e-05	0.000142629	3.84579	UP	protein_coding
TPM2	0.925232	8.95887	19.1115	1.23299e-05	0.000143771	3.84233	NO	protein_coding
ERAP1	-0.548339	5.97529	19.0999	1.24054e-05	0.000144542	3.84001	NO	protein_coding
ATG12	-0.324237	6.01005	19.0891	1.24752e-05	0.000145245	3.8379	NO	protein_coding
PSAP	-0.662612	9.49036	19.0851	1.25019e-05	0.000145445	3.8373	NO	protein_coding
WIZ	0.351598	6.27802	19.0738	1.25762e-05	0.0001462	3.83505	NO	protein_coding
ZBTB45	0.552009	3.84599	19.0648	1.26357e-05	0.000146781	3.83333	NO	protein_coding
ZNF836	-0.78378	2.39143	19.0424	1.27846e-05	0.000148398	3.82857	NO	protein_coding
ADAMTS10	-1.08843	3.70393	19.0313	1.28588e-05	0.000149035	3.82671	DOWN	protein_coding
PHB1	0.487344	6.05898	19.0182	1.29475e-05	0.00014995	3.82405	NO	protein_coding
INTS6L	-0.700674	3.41977	19.0145	1.29727e-05	0.000150129	3.82354	NO	protein_coding
ERRFI1	-1.1479	6.31642	19.0023	1.30559e-05	0.000150977	3.82109	DOWN	protein_coding
TARS2	0.465898	3.802	18.9842	1.31803e-05	0.000152302	3.8173	NO	protein_coding
MRPS34	0.651567	4.18394	18.955	1.33841e-05	0.00015454	3.81096	NO	protein_coding
NPTX1	3.21896	7.47025	18.9419	1.34763e-05	0.000155488	3.8083	UP	protein_coding
COL12A1	-0.797251	11.2586	18.9364	1.35147e-05	0.000155815	3.80739	NO	protein_coding
FAP	-0.808829	7.31567	18.9284	1.35715e-05	0.000156352	3.8059	NO	protein_coding
VAT1L	-1.68815	4.86299	18.9127	1.3684e-05	0.000157525	3.80265	DOWN	protein_coding
VCL	-0.401852	10.0063	18.9113	1.36938e-05	0.000157525	3.80265	NO	protein_coding
CAPN1	0.386357	7.4672	18.9039	1.3747e-05	0.000158018	3.80129	NO	protein_coding
POLR2F	0.760478	2.96047	18.9012	1.37663e-05	0.000158122	3.80101	NO	protein_coding
DENND10	-0.422962	5.49352	18.8879	1.38631e-05	0.000159115	3.79829	NO	protein_coding
EFHD2	0.345801	6.13042	18.8731	1.39711e-05	0.000160236	3.79524	NO	protein_coding
GGT5	-1.67328	0.481432	18.8543	1.41093e-05	0.0001617	3.79129	DOWN	protein_coding
EVA1B	0.704537	5.03678	18.8384	1.42276e-05	0.000162934	3.78799	NO	protein_coding
NAA40	-0.485805	4.53756	18.8067	1.4466e-05	0.000165541	3.78109	NO	protein_coding
GABBR2	1.22575	3.58985	18.7983	1.45299e-05	0.000166146	3.77951	UP	protein_coding
DTX2	0.727554	3.67899	18.7969	1.45405e-05	0.000166146	3.77951	NO	protein_coding
CHMP6	0.458502	3.63145	18.7924	1.45744e-05	0.000166251	3.77924	NO	protein_coding
PTP4A2	-0.352163	7.98597	18.7914	1.45821e-05	0.000166251	3.77924	NO	protein_coding
CSNK2A3	1.42447	-0.323208	18.7874	1.46133e-05	0.000166484	3.77863	UP	protein_coding
BICC1	-0.876366	6.22528	18.7768	1.46943e-05	0.000167282	3.77655	NO	protein_coding
TNFSF15	-4.30054	2.51555	18.7531	1.48784e-05	0.000169127	3.77179	DOWN	protein_coding
SCN7A	-3.06635	2.84593	18.7163	1.51676e-05	0.000172288	3.76374	DOWN	protein_coding
CHCHD6	0.891845	1.86159	18.712	1.52026e-05	0.000172558	3.76306	NO	protein_coding
NDUFAB1	0.612818	4.11981	18.7101	1.52172e-05	0.000172596	3.76297	NO	protein_coding
VPS4A	0.395962	6.15209	18.7036	1.52694e-05	0.000173061	3.7618	NO	protein_coding
CPZ	-2.43279	3.00905	18.687	1.54028e-05	0.000174444	3.75834	DOWN	protein_coding
SPDL1	1.28364	4.52365	18.6588	1.56321e-05	0.000176781	3.75256	UP	protein_coding
BCL10	-0.366467	5.43648	18.655	1.56635e-05	0.000177005	3.75201	NO	protein_coding
GADD45A	0.535077	5.19095	18.6181	1.59701e-05	0.000180338	3.74391	NO	protein_coding
ULBP2	1.01823	2.60088	18.6103	1.6035e-05	0.000180937	3.74247	UP	protein_coding
PNRC1	-1.05782	6.43186	18.6079	1.60557e-05	0.000181039	3.74223	DOWN	protein_coding
WNK4	0.776447	4.51952	18.6024	1.61016e-05	0.000181423	3.74131	NO	protein_coding
KCTD3	-0.431393	5.86078	18.5981	1.61383e-05	0.000181703	3.74064	NO	protein_coding
CDH11	-0.588892	8.34091	18.5747	1.63378e-05	0.000183816	3.73562	NO	protein_coding
MIER3	-0.435708	4.60643	18.5631	1.64371e-05	0.000184797	3.7333	NO	protein_coding
HRAS	0.531581	4.03295	18.561	1.64557e-05	0.000184807	3.73328	NO	protein_coding
VRK1	1.17862	3.6376	18.5602	1.6462e-05	0.000184807	3.73328	UP	protein_coding
REXO1	0.661931	5.68993	18.544	1.66027e-05	0.00018625	3.7299	NO	protein_coding
NCOA3	-0.325162	6.40828	18.5398	1.66393e-05	0.000186525	3.72926	NO	protein_coding
MARF1	-0.427907	6.29564	18.5322	1.67059e-05	0.000187135	3.72784	NO	protein_coding
TMUB1	0.501276	4.20066	18.5221	1.67949e-05	0.000187785	3.72634	NO	protein_coding
CD320	0.602979	4.02073	18.521	1.68043e-05	0.000187785	3.72634	NO	protein_coding
ORC1	2.41912	1.77682	18.521	1.68044e-05	0.000187785	3.72634	UP	protein_coding
RFX1	0.59398	4.18774	18.52	1.68127e-05	0.000187785	3.72634	NO	protein_coding
E2F7	1.46989	5.32374	18.507	1.6928e-05	0.000188798	3.724	UP	protein_coding
TOR1AIP2	-0.314063	7.91896	18.5043	1.69518e-05	0.000188927	3.72371	NO	protein_coding
C1orf35	0.995905	2.19227	18.4956	1.70301e-05	0.000189662	3.72202	NO	protein_coding
LMAN2	0.442923	6.8184	18.4934	1.70489e-05	0.000189734	3.72185	NO	protein_coding
MIPEP	-0.478249	4.23906	18.4895	1.70841e-05	0.000189988	3.72127	NO	protein_coding
AP1M1	0.523647	6.03631	18.4643	1.73112e-05	0.000192375	3.71585	NO	protein_coding
ATRX	-0.372587	7.54844	18.4555	1.7392e-05	0.000193005	3.71443	NO	protein_coding
AOX1	0.750965	5.51661	18.4554	1.7393e-05	0.000193005	3.71443	NO	protein_coding
FAM156A	1.28183	4.52313	18.4508	1.74345e-05	0.000193325	3.71371	UP	protein_coding
SLITRK1	1.94485	2.50152	18.4422	1.75138e-05	0.000194065	3.71205	UP	protein_coding
MSRB3	-0.427906	6.88483	18.4305	1.76214e-05	0.000195116	3.70971	NO	protein_coding
TSR3	0.656035	4.03482	18.4174	1.77431e-05	0.000196323	3.70703	NO	protein_coding
SIRT1	-0.664359	4.38721	18.3789	1.81052e-05	0.000200041	3.69888	NO	protein_coding
MOB3C	-0.610681	3.76345	18.3681	1.82082e-05	0.000201035	3.69673	NO	protein_coding
FRYL	0.440392	6.32821	18.3643	1.82443e-05	0.000201289	3.69618	NO	protein_coding
S1PR1	-0.996421	4.20683	18.3501	1.83813e-05	0.000202656	3.69324	NO	protein_coding
SASH1	-0.445577	6.87521	18.3364	1.85137e-05	0.000203969	3.69044	NO	protein_coding
KPNA2	0.957398	7.05266	18.3232	1.86418e-05	0.000205234	3.68775	NO	protein_coding
MT.ND1	1.38142	8.62409	18.3179	1.86941e-05	0.000205662	3.68685	UP	protein_coding
ERCC2	0.505837	6.23703	18.3124	1.87481e-05	0.000206108	3.6859	NO	protein_coding
CKS2	1.11753	3.10281	18.3098	1.8774e-05	0.000206245	3.68562	UP	protein_coding
ADAMTS9	-1.98166	2.3153	18.2994	1.88766e-05	0.000207225	3.68356	DOWN	protein_coding
RAB4A	-0.461308	4.97324	18.2899	1.89707e-05	0.00020811	3.68171	NO	protein_coding
ZNF639	-0.504098	4.51485	18.2809	1.90607e-05	0.000208947	3.67996	NO	protein_coding
ACAD11	-0.629349	5.18188	18.2765	1.91052e-05	0.000209286	3.67926	NO	protein_coding
SERPINA3	-2.1851	0.916669	18.2636	1.92348e-05	0.000210556	3.67663	DOWN	protein_coding
PDHX	-0.443665	5.01879	18.257	1.9301e-05	0.000211131	3.67545	NO	protein_coding
PTGES	-1.8002	2.16868	18.2435	1.94387e-05	0.000212485	3.67267	DOWN	protein_coding
REV1	-0.488098	4.53709	18.2284	1.95934e-05	0.000214024	3.66954	NO	protein_coding
SPHK2	0.447556	4.22119	18.2179	1.97014e-05	0.000214991	3.66758	NO	protein_coding
ATP5MF	0.573723	5.53862	18.2171	1.97099e-05	0.000214991	3.66758	NO	protein_coding
ZDHHC8	0.466329	6.19103	18.2052	1.98338e-05	0.000216037	3.66547	NO	protein_coding
DDIAS	2.15694	2.23999	18.2001	1.98864e-05	0.00021635	3.66484	UP	protein_coding
ACP3	-1.7801	2.26491	18.1907	1.99854e-05	0.000217226	3.66309	DOWN	protein_coding
HMBS	0.526913	3.82197	18.1885	2.00086e-05	0.000217325	3.66289	NO	protein_coding
PSG2	2.06334	-0.336936	18.1827	2.00698e-05	0.000217836	3.66187	UP	protein_coding
SNRPB	0.63101	5.73603	18.1749	2.01519e-05	0.000218573	3.6604	NO	protein_coding
FAM3A	0.445211	4.60151	18.1647	2.02603e-05	0.000219594	3.65838	NO	protein_coding
CRACD	-1.24794	1.99491	18.1545	2.03684e-05	0.00022061	3.65637	DOWN	protein_coding
ANKRD1	3.20301	1.47086	18.1475	2.04434e-05	0.000221266	3.65508	UP	protein_coding
CAPZA2	-0.36773	6.48093	18.117	2.07743e-05	0.00022445	3.64888	NO	protein_coding
PAPOLA	-0.335675	7.35449	18.1163	2.07814e-05	0.00022445	3.64888	NO	protein_coding
RNF130	-0.495786	3.82048	18.1112	2.08371e-05	0.000224895	3.64802	NO	protein_coding
PRXL2B	0.549124	4.51764	18.1061	2.08926e-05	0.000225335	3.64717	NO	protein_coding
GCLM	-0.983433	6.24541	18.0987	2.09741e-05	0.000226056	3.64578	NO	protein_coding
MCM9	-0.539667	3.28445	18.0935	2.10318e-05	0.000226364	3.64519	NO	protein_coding
OSMR	-0.757827	7.79751	18.0935	2.10321e-05	0.000226364	3.64519	NO	protein_coding
EIF3L	-0.38757	7.33008	18.0733	2.12561e-05	0.000228615	3.6409	NO	protein_coding
YPEL1	-1.80238	0.515765	18.0603	2.14015e-05	0.000229857	3.63854	DOWN	protein_coding
SCP2	-0.483969	6.36389	18.0515	2.15007e-05	0.000230761	3.63684	NO	protein_coding
ZNF664	-0.454163	6.29294	18.04	2.16313e-05	0.000231839	3.63481	NO	protein_coding
CIP2A	1.43396	3.91354	18.0374	2.16603e-05	0.000231988	3.63453	UP	protein_coding
RPL15	-0.395049	9.39479	18.0251	2.18017e-05	0.00023334	3.63201	NO	protein_coding
SNX25	0.545816	4.28251	17.9949	2.21494e-05	0.000236896	3.62544	NO	protein_coding
VWCE	-1.3135	1.76183	17.9884	2.22257e-05	0.000237547	3.62425	DOWN	protein_coding
MICA	0.702834	5.71805	17.9707	2.24328e-05	0.000239595	3.62052	NO	protein_coding
NBAS	-0.289792	7.01712	17.9525	2.26489e-05	0.000241735	3.61666	NO	protein_coding
CTSZ	0.482237	6.32078	17.9408	2.27886e-05	0.000243058	3.61429	NO	protein_coding
OSTC	-0.416565	6.36301	17.9319	2.28946e-05	0.000244018	3.61258	NO	protein_coding
CTSO	-0.878088	4.70937	17.9149	2.31003e-05	0.000246041	3.60899	NO	protein_coding
HEBP1	-0.630898	5.42866	17.8977	2.33101e-05	0.000247932	3.60567	NO	protein_coding
TRIM38	-0.559004	5.93666	17.8888	2.34194e-05	0.000248922	3.60394	NO	protein_coding
PPM1G	0.530502	5.49462	17.8822	2.35005e-05	0.000249611	3.60274	NO	protein_coding
KMT2D	0.60085	7.93469	17.8669	2.36908e-05	0.000251459	3.59953	NO	protein_coding
TPI1	0.480663	8.22201	17.8597	2.37804e-05	0.000252236	3.59819	NO	protein_coding
HMG20B	0.457637	5.67043	17.8528	2.3867e-05	0.00025298	3.59691	NO	protein_coding
CPNE2	0.471881	3.97616	17.8455	2.39582e-05	0.000253772	3.59556	NO	protein_coding
TRIM5	-0.603364	5.74525	17.8411	2.40142e-05	0.00025419	3.59484	NO	protein_coding
NRP2	-1.02277	7.34962	17.8088	2.44256e-05	0.000258367	3.58776	DOWN	protein_coding
ZMYM2	-0.415533	6.49955	17.8048	2.44764e-05	0.000258727	3.58716	NO	protein_coding
PMP22	-0.997251	5.74668	17.802	2.45127e-05	0.000258933	3.58681	NO	protein_coding
MT.ND4	1.3127	10.884	17.7955	2.45968e-05	0.000259642	3.58563	UP	protein_coding
GTF2A2	-0.355118	4.86426	17.7668	2.49707e-05	0.000263408	3.57937	NO	protein_coding
PDLIM3	-1.56093	2.21022	17.7499	2.51937e-05	0.000265578	3.57581	DOWN	protein_coding
MAD1L1	0.554085	4.17801	17.7477	2.5222e-05	0.000265695	3.57562	NO	protein_coding
DDX54	0.512092	5.69491	17.7417	2.53024e-05	0.000266359	3.57453	NO	protein_coding
MRPL58	0.492213	3.31204	17.7273	2.5494e-05	0.000268192	3.57155	NO	protein_coding
IFI27L1	0.871368	1.7274	17.6999	2.58645e-05	0.000271718	3.56588	NO	protein_coding
UBL5	0.608556	4.36094	17.6891	2.60106e-05	0.000273067	3.56373	NO	protein_coding
POLD1	1.02202	3.93582	17.6867	2.60445e-05	0.000273198	3.56352	UP	protein_coding
MCM7	1.31286	5.65261	17.6856	2.60586e-05	0.000273198	3.56352	UP	protein_coding
TLE2	-1.91832	-0.592759	17.683	2.60953e-05	0.000273397	3.56321	DOWN	protein_coding
TPST1	-0.750824	5.437	17.6737	2.62225e-05	0.000274356	3.56168	NO	protein_coding
LUM	-1.36565	7.7399	17.6737	2.62226e-05	0.000274356	3.56168	DOWN	protein_coding
PSG5	1.02272	6.94016	17.6645	2.63504e-05	0.000275505	3.55987	UP	protein_coding
SETX	-0.315442	7.3521	17.6519	2.65247e-05	0.00027714	3.5573	NO	protein_coding
LYNX1	-0.803449	3.94811	17.6463	2.66027e-05	0.000277767	3.55632	NO	protein_coding
TMEM109	0.644741	5.48683	17.641	2.66769e-05	0.000278352	3.55541	NO	protein_coding
CYP3A7	-2.85019	-0.254686	17.6089	2.71318e-05	0.000282906	3.54836	DOWN	protein_coding
CPD	-0.578982	8.53106	17.5978	2.72911e-05	0.000284306	3.54621	NO	protein_coding
EEIG2	-0.437136	4.01114	17.5969	2.7303e-05	0.000284306	3.54621	NO	protein_coding
SLX9	0.876227	2.61287	17.583	2.75037e-05	0.000286044	3.54357	NO	protein_coding
HECTD2	-0.586455	4.35315	17.5828	2.75071e-05	0.000286044	3.54357	NO	protein_coding
ATP13A2	0.563	4.8772	17.5813	2.75279e-05	0.000286067	3.54353	NO	protein_coding
BMS1	0.470321	5.38919	17.564	2.77803e-05	0.000288495	3.53986	NO	protein_coding
G3BP2	-0.356588	7.59104	17.5301	2.82801e-05	0.000293315	3.53267	NO	protein_coding
ZNF414	0.562992	2.76923	17.5299	2.82826e-05	0.000293315	3.53267	NO	protein_coding
SUN2	0.750519	6.37259	17.5275	2.83187e-05	0.000293471	3.53243	NO	protein_coding
ADAM17	-0.476591	6.11794	17.5263	2.83358e-05	0.000293471	3.53243	NO	protein_coding
BLOC1S1	0.627547	3.8055	17.5213	2.84102e-05	0.000294044	3.53159	NO	protein_coding
COMT	0.512298	6.30863	17.5161	2.84892e-05	0.000294663	3.53067	NO	protein_coding
GET4	0.400252	4.59304	17.5145	2.8513e-05	0.000294711	3.5306	NO	protein_coding
EPHX1	-0.65399	5.5182	17.5061	2.86394e-05	0.000295818	3.52897	NO	protein_coding
DDX27	0.389099	4.83149	17.4837	2.89781e-05	0.000299116	3.52416	NO	protein_coding
ZNF83	-0.500251	5.11187	17.4747	2.91155e-05	0.000300333	3.5224	NO	protein_coding
FAIM2	-1.55939	2.36828	17.4565	2.93953e-05	0.000302695	3.519	DOWN	protein_coding
PLEKHA6	-0.641729	5.94172	17.4552	2.94156e-05	0.000302695	3.519	NO	protein_coding
MT.ATP8	1.2251	4.70112	17.4547	2.94232e-05	0.000302695	3.519	UP	protein_coding
LRRC32	-0.923043	4.60504	17.4335	2.97531e-05	0.000305885	3.51444	NO	protein_coding
PODXL	2.21202	4.71215	17.4231	2.99175e-05	0.000307229	3.51254	UP	protein_coding
POLR3GL	0.753267	2.80191	17.4203	2.99603e-05	0.000307229	3.51254	NO	protein_coding
ERMP1	-0.608876	4.45622	17.4038	3.02221e-05	0.000309671	3.5091	NO	protein_coding
ACAT2	0.964362	4.50658	17.4017	3.02553e-05	0.000309805	3.50891	NO	protein_coding
MST1	-1.15467	2.1709	17.3929	3.03961e-05	0.000310843	3.50746	DOWN	protein_coding
COL4A6	-2.10804	3.18862	17.3928	3.03971e-05	0.000310843	3.50746	DOWN	protein_coding
MT.ND4L	0.770929	6.24576	17.3895	3.04507e-05	0.000311184	3.50698	NO	protein_coding
GINS1	1.4979	2.94159	17.3792	3.0616e-05	0.000312665	3.50492	UP	protein_coding
RPAP1	0.370049	4.82944	17.3776	3.06416e-05	0.000312719	3.50485	NO	protein_coding
IER3IP1	-0.493285	4.84875	17.3682	3.0793e-05	0.000314056	3.50299	NO	protein_coding
ATXN2L	0.433958	7.43185	17.3607	3.09158e-05	0.000315099	3.50155	NO	protein_coding
ABHD17A	0.360691	5.87402	17.3578	3.09628e-05	0.000315286	3.50129	NO	protein_coding
CCNG2	-0.93381	5.43277	17.357	3.09751e-05	0.000315286	3.50129	NO	protein_coding
AP3S1	-0.413768	5.94778	17.3546	3.10151e-05	0.000315484	3.50102	NO	protein_coding
BANF1	0.450173	5.42289	17.3507	3.10783e-05	0.000315919	3.50042	NO	protein_coding
COL17A1	1.98894	-0.486324	17.3439	3.11892e-05	0.000316836	3.49917	UP	protein_coding
SRSF8	-0.595214	4.39975	17.3391	3.12686e-05	0.000317433	3.49835	NO	protein_coding
GPR137B	-0.652739	4.2998	17.3237	3.1523e-05	0.000319805	3.49512	NO	protein_coding
PDGFD	-3.03404	4.08656	17.3199	3.15856e-05	0.000320095	3.49472	DOWN	protein_coding
GLIPR2	-0.967393	5.02415	17.3195	3.15933e-05	0.000320095	3.49472	NO	protein_coding
MAT2A	-0.459287	7.72943	17.3147	3.16722e-05	0.000320684	3.49392	NO	protein_coding
ALPL	-2.34981	3.19829	17.2919	3.20552e-05	0.000324348	3.48899	DOWN	protein_coding
FGF7	-1.34232	6.41788	17.2871	3.2136e-05	0.000324951	3.48818	DOWN	protein_coding
PUM2	-0.277719	6.66284	17.2735	3.23676e-05	0.000327079	3.48535	NO	protein_coding
ELL2	-0.426476	8.29687	17.267	3.24773e-05	0.000327972	3.48416	NO	protein_coding
SDK1	-1.14408	4.15348	17.225	3.32047e-05	0.000334855	3.47514	DOWN	protein_coding
PDGFC	-0.50491	6.92632	17.2238	3.32242e-05	0.000334855	3.47514	NO	protein_coding
LRRC45	0.869075	2.71758	17.2129	3.34157e-05	0.000336422	3.47312	NO	protein_coding
FBXO5	1.61118	3.33629	17.2125	3.34234e-05	0.000336422	3.47312	UP	protein_coding
WDR76	1.39152	3.46034	17.2082	3.34994e-05	0.000336966	3.47241	UP	protein_coding
GNG10	-0.435501	5.14342	17.206	3.35376e-05	0.000337129	3.4722	NO	protein_coding
GNAI2	0.434544	8.72854	17.1958	3.37173e-05	0.000338714	3.47017	NO	protein_coding
RFX7	-0.401461	5.96171	17.1901	3.38199e-05	0.000339523	3.46913	NO	protein_coding
SHISA2	3.18707	-1.3543	17.1831	3.39441e-05	0.000340548	3.46782	UP	protein_coding
PPP1R13L	1.15398	3.11054	17.1785	3.40262e-05	0.00034115	3.46705	UP	protein_coding
ATXN1	-0.557759	5.8541	17.1747	3.40942e-05	0.000341609	3.46647	NO	protein_coding
FRY	-1.01356	6.04706	17.1489	3.45614e-05	0.00034598	3.46095	DOWN	protein_coding
PAQR5	-0.882043	2.72214	17.1481	3.45755e-05	0.00034598	3.46095	NO	protein_coding
ATP7A	-0.538073	5.97021	17.1424	3.46789e-05	0.000346789	3.45994	NO	protein_coding
BNIP3L	-0.781788	7.28537	17.1408	3.47085e-05	0.000346859	3.45985	NO	protein_coding
UQCC3	0.806489	2.0915	17.1393	3.47361e-05	0.00034691	3.45978	NO	protein_coding
PRKG1	-0.511813	6.08337	17.1331	3.48489e-05	0.000347732	3.45876	NO	protein_coding
NAV2	0.773718	7.089	17.1323	3.48636e-05	0.000347732	3.45876	NO	protein_coding
SDCBP	-0.504993	7.21591	17.1301	3.49044e-05	0.000347913	3.45853	NO	protein_coding
RASSF4	-1.22537	3.31779	17.1279	3.49452e-05	0.000348094	3.4583	DOWN	protein_coding
MGST2	-0.90306	2.36527	17.1253	3.49929e-05	0.000348344	3.45799	NO	protein_coding
LAMTOR1	0.367118	5.38418	17.1102	3.52716e-05	0.000350891	3.45483	NO	protein_coding
SLC39A11	-0.580124	4.19658	17.108	3.53136e-05	0.000351081	3.45459	NO	protein_coding
CWC27	0.466316	4.40077	17.1064	3.53435e-05	0.000351151	3.45451	NO	protein_coding
RPS6KA5	-1.39109	1.69206	17.0956	3.55452e-05	0.00035253	3.4528	DOWN	protein_coding
TRAM1	-0.665235	9.11265	17.0953	3.5551e-05	0.00035253	3.4528	NO	protein_coding
CARM1	0.471512	6.3508	17.0927	3.55986e-05	0.000352775	3.4525	NO	protein_coding
PYCR2	0.386659	4.60266	17.0761	3.59118e-05	0.000355649	3.44898	NO	protein_coding
TMEM18	0.462642	3.85195	17.0712	3.60045e-05	0.000356338	3.44814	NO	protein_coding
NFIC	0.479646	8.51405	17.0472	3.64614e-05	0.000360396	3.44322	NO	protein_coding
KRT15	1.61251	0.96576	17.0453	3.64982e-05	0.000360528	3.44306	UP	protein_coding
CNTRL	0.914533	3.91892	17.0121	3.71423e-05	0.000366479	3.43595	NO	protein_coding
KISS1	2.00274	1.76046	17.0111	3.71622e-05	0.000366479	3.43595	UP	protein_coding
AATF	0.51103	4.67786	17.0106	3.71721e-05	0.000366479	3.43595	NO	protein_coding
GPKOW	0.532519	3.36959	16.9934	3.75102e-05	0.000369469	3.43242	NO	protein_coding
TMEFF2	0.945381	1.3553	16.9901	3.75747e-05	0.000369469	3.43242	NO	protein_coding
RASL11B	-2.68401	-0.544307	16.989	3.75964e-05	0.000369469	3.43242	DOWN	protein_coding
ASS1	-1.21799	4.65155	16.989	3.75968e-05	0.000369469	3.43242	DOWN	protein_coding
DCTN2	0.26907	6.27884	16.9889	3.75982e-05	0.000369469	3.43242	NO	protein_coding
DESI2	-0.415101	6.0402	16.9879	3.76195e-05	0.000369469	3.43242	NO	protein_coding
CHCHD3	0.548174	4.50109	16.9865	3.76472e-05	0.000369505	3.43238	NO	protein_coding
ZNF442	1.07368	1.5516	16.9852	3.7673e-05	0.000369522	3.43236	UP	protein_coding
ZKSCAN8	-0.439488	5.85678	16.9771	3.78333e-05	0.000370858	3.43079	NO	protein_coding
RARRES2	-4.07704	-0.319459	16.975	3.78745e-05	0.000371026	3.4306	DOWN	protein_coding
UFM1	-0.433754	6.49137	16.972	3.79348e-05	0.000371379	3.43018	NO	protein_coding
PROSER3	0.531751	4.63616	16.9646	3.80829e-05	0.000372592	3.42877	NO	protein_coding
CENPN	1.2274	4.17309	16.9615	3.81455e-05	0.000372858	3.42846	UP	protein_coding
POM121	0.468236	6.55099	16.9609	3.81585e-05	0.000372858	3.42846	NO	protein_coding
SUSD5	0.866417	3.46337	16.9451	3.84773e-05	0.000375734	3.42512	NO	protein_coding
THOP1	0.646833	4.91583	16.9416	3.85482e-05	0.000376188	3.4246	NO	protein_coding
HR	-2.32813	2.87909	16.9325	3.8733e-05	0.000377751	3.42279	DOWN	protein_coding
ELFN1	0.707417	4.40268	16.9145	3.91018e-05	0.000381107	3.41895	NO	protein_coding
SSR1	-0.349134	8.3091	16.9103	3.9189e-05	0.000381714	3.41826	NO	protein_coding
SIRT6	0.508378	3.60923	16.9052	3.92947e-05	0.000382502	3.41737	NO	protein_coding
HARS1	0.428469	6.10027	16.8955	3.94942e-05	0.0003842	3.41544	NO	protein_coding
ZNF367	2.4934	2.04124	16.8897	3.96151e-05	0.000385133	3.41439	UP	protein_coding
ADPRHL1	1.94882	1.40468	16.8787	3.98472e-05	0.000386904	3.4124	UP	protein_coding
GFPT2	-0.653608	4.03524	16.8664	4.01063e-05	0.000389171	3.40986	NO	protein_coding
ZBTB8A	-0.564282	3.47071	16.8477	4.05022e-05	0.000392764	3.40587	NO	protein_coding
TNFAIP8	-1.25693	4.32108	16.8458	4.05427e-05	0.000392909	3.40571	DOWN	protein_coding
DCP2	-0.437653	5.29286	16.8426	4.06116e-05	0.000393329	3.40524	NO	protein_coding
ARL8B	-0.422824	6.38909	16.8229	4.10353e-05	0.000397182	3.40101	NO	protein_coding
CA11	-1.72955	0.505445	16.8198	4.11023e-05	0.00039758	3.40058	DOWN	protein_coding
PRPF31	0.403282	4.87227	16.812	4.12711e-05	0.000398963	3.39907	NO	protein_coding
SLC35A4	0.377581	4.15713	16.8099	4.13169e-05	0.000399018	3.39901	NO	protein_coding
RABEP2	0.664204	3.91483	16.8094	4.13287e-05	0.000399018	3.39901	NO	protein_coding
PMM1	0.342583	4.68307	16.7968	4.16035e-05	0.000401419	3.3964	NO	protein_coding
SRGAP1	0.398296	7.73233	16.7748	4.20878e-05	0.000405838	3.39165	NO	protein_coding
NCLN	0.695172	6.8825	16.7714	4.21641e-05	0.000406064	3.39141	NO	protein_coding
IFT80	-0.742778	5.11399	16.7617	4.23812e-05	0.000407899	3.38945	NO	protein_coding
FGFR1OP2	-0.370975	4.91524	16.7597	4.24257e-05	0.000408072	3.38926	NO	protein_coding
PPA1	-0.35148	5.87503	16.7543	4.25467e-05	0.00040898	3.3883	NO	protein_coding
PPP4R2	-0.344496	6.1805	16.7195	4.3334e-05	0.000416287	3.38061	NO	protein_coding
MED16	0.43617	5.50556	16.7049	4.36679e-05	0.000419086	3.3777	NO	protein_coding
SCARB2	-0.377889	8.05913	16.7033	4.37057e-05	0.000419086	3.3777	NO	protein_coding
SLFN11	-0.633514	5.07181	16.7032	4.3707e-05	0.000419086	3.3777	NO	protein_coding
SAPCD1	2.80802	-1.00494	16.6943	4.39139e-05	0.000420677	3.37605	UP	protein_coding
TUT4	-0.421884	5.87155	16.6937	4.39277e-05	0.000420677	3.37605	NO	protein_coding
SULT1C4	-3.35007	0.294972	16.6917	4.39736e-05	0.000420855	3.37587	DOWN	protein_coding
SPOPL	-0.377513	4.73458	16.6616	4.46753e-05	0.000427305	3.36926	NO	protein_coding
ABCB8	0.46412	4.68089	16.6408	4.51678e-05	0.000431747	3.36477	NO	protein_coding
GNPDA1	-0.513238	5.40985	16.635	4.53066e-05	0.000432805	3.36371	NO	protein_coding
BEND3	-0.848148	2.61175	16.623	4.55958e-05	0.000435297	3.36121	NO	protein_coding
CCDC22	0.657434	3.25912	16.6044	4.60432e-05	0.000439296	3.35724	NO	protein_coding
IGBP1	-0.489671	4.84031	16.595	4.62718e-05	0.000441203	3.35536	NO	protein_coding
RNF24	-0.626575	6.44922	16.5857	4.64997e-05	0.000442646	3.35394	NO	protein_coding
RPS7	-0.354152	7.98117	16.5853	4.65095e-05	0.000442646	3.35394	NO	protein_coding
CDC14A	-0.857565	2.05407	16.5826	4.65762e-05	0.000443007	3.35359	NO	protein_coding
EFL1	0.574232	4.53439	16.5791	4.66614e-05	0.000443543	3.35306	NO	protein_coding
TOMM34	0.787135	5.0286	16.574	4.67875e-05	0.000444287	3.35234	NO	protein_coding
POLR2L	0.701275	6.0627	16.5736	4.67975e-05	0.000444287	3.35234	NO	protein_coding
SF3B1	-0.337923	8.58293	16.5533	4.73028e-05	0.000448531	3.34821	NO	protein_coding
GINS4	1.06258	3.6754	16.5448	4.75145e-05	0.00045026	3.34654	UP	protein_coding
GABRE	-1.40385	2.82444	16.5398	4.76394e-05	0.000451167	3.34566	DOWN	protein_coding
CCM2	0.494436	4.79324	16.5133	4.83098e-05	0.000457234	3.33986	NO	protein_coding
H2AC25	0.852718	1.34743	16.5011	4.86212e-05	0.000459615	3.33761	NO	protein_coding
ANAPC15	0.795341	2.99435	16.4773	4.92349e-05	0.000465131	3.33243	NO	protein_coding
AHNAK	0.6366	11.7429	16.4624	4.96234e-05	0.000467972	3.32978	NO	protein_coding
CLK4	-0.509911	4.14488	16.4621	4.96315e-05	0.000467972	3.32978	NO	protein_coding
FAM83D	1.74622	3.38213	16.4611	4.96574e-05	0.000467972	3.32978	UP	protein_coding
NDUFS8	0.385405	5.17118	16.4576	4.97495e-05	0.000468553	3.32924	NO	protein_coding
MTFR2	2.03861	0.651092	16.4512	4.99181e-05	0.000469853	3.32804	UP	protein_coding
RGS17	-0.877023	3.37835	16.4441	5.01071e-05	0.000471344	3.32666	NO	protein_coding
ITPA	0.628626	3.72203	16.4268	5.05641e-05	0.000475352	3.32299	NO	protein_coding
CSPG4	0.725917	8.49683	16.4146	5.08912e-05	0.000477892	3.32067	NO	protein_coding
KANSL3	-0.295365	5.69909	16.4144	5.08964e-05	0.000477892	3.32067	NO	protein_coding
ZRANB1	-0.581544	5.82671	16.4099	5.1017e-05	0.000478732	3.31991	NO	protein_coding
CSNK1G3	-0.398732	5.44884	16.384	5.17212e-05	0.000484748	3.31448	NO	protein_coding
DPP3	0.453532	5.39291	16.382	5.17751e-05	0.000484958	3.3143	NO	protein_coding
HIPK2	-0.680466	9.28642	16.3744	5.19817e-05	0.000486597	3.31283	NO	protein_coding
EXT1	-0.617102	8.26952	16.3561	5.24876e-05	0.000491034	3.30889	NO	protein_coding
XPO1	0.515432	8.04753	16.3521	5.25968e-05	0.000491734	3.30827	NO	protein_coding
EEF1A1	-0.429822	12.7617	16.3511	5.26264e-05	0.000491734	3.30827	NO	protein_coding
ROR2	-2.03609	2.36976	16.3294	5.32314e-05	0.000497085	3.30357	DOWN	protein_coding
ACOT11	1.35585	1.32371	16.328	5.32722e-05	0.000497164	3.3035	UP	protein_coding
LTBP4	-1.4227	7.1309	16.3208	5.34734e-05	0.000498739	3.30213	DOWN	protein_coding
PLAAT4	-2.07258	0.806915	16.3055	5.39085e-05	0.000501884	3.2994	DOWN	protein_coding
TMEM120A	0.469483	4.03632	16.3006	5.40476e-05	0.000502875	3.29854	NO	protein_coding
SNRPA1	0.582629	3.99746	16.2963	5.4169e-05	0.000503551	3.29796	NO	protein_coding
STAT5A	-1.0431	2.3724	16.2957	5.41857e-05	0.000503551	3.29796	DOWN	protein_coding
EIF6	0.443209	6.12149	16.2797	5.46462e-05	0.000507523	3.29454	NO	protein_coding
OLFML2A	-2.41339	6.00354	16.275	5.47829e-05	0.000508486	3.29372	DOWN	protein_coding
FMN2	0.69162	6.35783	16.2656	5.50558e-05	0.000510711	3.29183	NO	protein_coding
RALGPS2	-0.979059	6.6624	16.2631	5.51262e-05	0.000511056	3.29153	NO	protein_coding
ABHD12	0.636329	6.44726	16.2587	5.52553e-05	0.000511943	3.29078	NO	protein_coding
PSMA7	0.473987	6.02272	16.2575	5.52913e-05	0.000511969	3.29076	NO	protein_coding
JUP	-0.912986	4.9316	16.2535	5.54081e-05	0.000512741	3.2901	NO	protein_coding
DSCC1	1.88064	1.12614	16.2362	5.59143e-05	0.000516888	3.2866	UP	protein_coding
TPP1	-0.700352	7.6117	16.2291	5.61266e-05	0.000518455	3.28529	NO	protein_coding
PARP14	-0.712246	6.45362	16.2262	5.62107e-05	0.00051892	3.2849	NO	protein_coding
GOLIM4	0.520792	6.69057	16.2244	5.62653e-05	0.000519026	3.28481	NO	protein_coding
MMP11	-1.1535	2.54214	16.2236	5.62897e-05	0.000519026	3.28481	DOWN	protein_coding
ZNF322	-0.450603	4.64172	16.2162	5.65094e-05	0.00052074	3.28338	NO	protein_coding
PRKACB	-0.449054	5.76891	16.2137	5.65829e-05	0.000521104	3.28308	NO	protein_coding
H3C6	1.52349	4.25729	16.2051	5.68412e-05	0.000522858	3.28162	UP	protein_coding
SMARCAL1	0.363299	4.55525	16.2018	5.69408e-05	0.000523461	3.28112	NO	protein_coding
SPG21	-0.416885	5.39389	16.1928	5.72113e-05	0.000525633	3.27932	NO	protein_coding
TSPAN2	-1.31171	0.140587	16.177	5.76912e-05	0.000529726	3.27595	DOWN	protein_coding
TONSL	1.26518	3.57846	16.1749	5.77542e-05	0.000529988	3.27573	UP	protein_coding
CCDC150	1.6796	1.32628	16.1728	5.78181e-05	0.000530258	3.27551	UP	protein_coding
MIEF2	0.889834	3.52751	16.1702	5.78993e-05	0.000530686	3.27516	NO	protein_coding
ABCF2	0.35758	5.52875	16.1685	5.79502e-05	0.000530836	3.27504	NO	protein_coding
AKR1B1	-0.932586	6.74445	16.1627	5.81278e-05	0.000531829	3.27423	NO	protein_coding
WDR54	0.738483	2.44974	16.1585	5.82569e-05	0.000532694	3.27352	NO	protein_coding
CPQ	-0.554159	4.7737	16.1447	5.86838e-05	0.000536279	3.27061	NO	protein_coding
CIB2	-1.12536	0.264628	16.1414	5.87839e-05	0.000536875	3.27013	DOWN	protein_coding
ZNF791	-0.351826	5.04119	16.1349	5.89868e-05	0.000538407	3.26889	NO	protein_coding
STYK1	2.32842	-0.103322	16.1256	5.92779e-05	0.000540469	3.26723	UP	protein_coding
FEN1	1.44649	3.51623	16.1254	5.92829e-05	0.000540469	3.26723	UP	protein_coding
SNTA1	0.631815	3.6715	16.1204	5.94389e-05	0.00054157	3.26635	NO	protein_coding
STON1	-0.99756	4.83645	16.1122	5.96967e-05	0.000543597	3.26472	NO	protein_coding
FZD8	1.485	4.85272	16.1079	5.9833e-05	0.000544516	3.26399	UP	protein_coding
ARHGAP11B	1.68703	0.509503	16.0915	6.03534e-05	0.00054853	3.2608	UP	protein_coding
OPCML	2.12009	1.21234	16.0907	6.03811e-05	0.00054853	3.2608	UP	protein_coding
E2F8	2.81075	0.556537	16.0813	6.06799e-05	0.000550919	3.25891	UP	protein_coding
SAT1	-0.624513	5.19838	16.0758	6.08554e-05	0.000552186	3.25791	NO	protein_coding
SLC27A4	0.690373	4.64903	16.0589	6.14018e-05	0.000556768	3.25433	NO	protein_coding
GLYCTK	0.856397	2.35346	16.058	6.14327e-05	0.000556768	3.25433	NO	protein_coding
ITCH	-0.289981	6.62456	16.0479	6.17604e-05	0.000559408	3.25227	NO	protein_coding
GALE	0.516876	3.69428	16.0333	6.22395e-05	0.000563416	3.24917	NO	protein_coding
WDR26	-0.351595	8.07952	16.0028	6.32478e-05	0.000572206	3.24245	NO	protein_coding
GOT2	0.319169	6.43752	15.9868	6.37842e-05	0.00057672	3.23904	NO	protein_coding
PSMD4	0.340068	5.70872	15.9837	6.38896e-05	0.000577334	3.23857	NO	protein_coding
RPTOR	0.369495	6.09159	15.968	6.44211e-05	0.000581697	3.2353	NO	protein_coding
C19orf53	0.873384	4.09155	15.9665	6.44727e-05	0.000581697	3.2353	NO	protein_coding
TXNDC17	0.600569	4.16805	15.9661	6.4486e-05	0.000581697	3.2353	NO	protein_coding
SSBP3	-0.486528	5.56924	15.962	6.4626e-05	0.000582619	3.23462	NO	protein_coding
COL3A1	-1.14002	10.3014	15.9502	6.50321e-05	0.000585937	3.23215	DOWN	protein_coding
SAP30BP	0.386597	5.23319	15.9386	6.543e-05	0.000589176	3.22975	NO	protein_coding
EIF3I	0.299244	6.769	15.8929	6.70287e-05	0.000603219	3.21952	NO	protein_coding
TP53I11	-0.857281	6.04006	15.8885	6.71863e-05	0.000603958	3.21899	NO	protein_coding
BOLA3	0.543029	3.1099	15.8884	6.71894e-05	0.000603958	3.21899	NO	protein_coding
PERP	-0.410806	7.1222	15.8775	6.75763e-05	0.000607082	3.21675	NO	protein_coding
STOM	-0.956084	8.65219	15.8395	6.89489e-05	0.000618995	3.20831	NO	protein_coding
SCN2A	-1.03069	2.41053	15.8385	6.89829e-05	0.000618995	3.20831	DOWN	protein_coding
TCF7	0.675559	2.73091	15.8305	6.92782e-05	0.000621282	3.20671	NO	protein_coding
HEG1	-0.860826	8.71875	15.8248	6.94861e-05	0.000622783	3.20566	NO	protein_coding
DDX39A	1.01035	4.70117	15.8205	6.96434e-05	0.00062383	3.20493	UP	protein_coding
ZNF568	-0.459147	3.26853	15.8137	6.98941e-05	0.000625711	3.20363	NO	protein_coding
TUFM	0.321987	6.56976	15.8103	7.0022e-05	0.000626491	3.20309	NO	protein_coding
RPS15	0.626507	7.4263	15.7957	7.05642e-05	0.000630975	3.19999	NO	protein_coding
WASL	-0.352207	5.96342	15.7937	7.06355e-05	0.000631246	3.1998	NO	protein_coding
FLII	0.529815	7.85653	15.7898	7.07826e-05	0.000632193	3.19915	NO	protein_coding
DCUN1D4	-0.409516	5.61916	15.7805	7.11326e-05	0.000634582	3.19751	NO	protein_coding
XPOT	-0.498747	7.75693	15.7438	7.25262e-05	0.000646184	3.18964	NO	protein_coding
SLC25A5	0.401354	6.09615	15.7429	7.25591e-05	0.000646184	3.18964	NO	protein_coding
HTATSF1	0.436325	4.64973	15.7383	7.27375e-05	0.000646641	3.18934	NO	protein_coding
PPP1CB	-0.454381	7.91674	15.7368	7.27938e-05	0.000646641	3.18934	NO	protein_coding
FAM89A	-0.708858	1.88916	15.7361	7.28207e-05	0.000646641	3.18934	NO	protein_coding
DGKZ	0.331069	6.05038	15.7316	7.29954e-05	0.000647818	3.18855	NO	protein_coding
PIF1	0.934477	2.80384	15.7262	7.32049e-05	0.000649303	3.18755	NO	protein_coding
YTHDF2	-0.289105	6.23924	15.7088	7.38792e-05	0.000654906	3.18382	NO	protein_coding
COG3	-0.307696	5.19445	15.6979	7.43048e-05	0.0006583	3.18158	NO	protein_coding
CAMLG	-0.414703	4.79029	15.6554	7.59952e-05	0.000672888	3.17206	NO	protein_coding
ABCC4	-0.733725	7.34758	15.6523	7.61202e-05	0.000673607	3.17159	NO	protein_coding
BET1	-0.54585	4.26747	15.6391	7.66519e-05	0.000677532	3.16907	NO	protein_coding
IL17RD	-0.918037	1.46193	15.6377	7.67086e-05	0.000677644	3.169	NO	protein_coding
SMARCA4	0.411053	7.40257	15.6328	7.69085e-05	0.00067902	3.16812	NO	protein_coding
ELAC2	0.410208	5.7292	15.631	7.69825e-05	0.000679283	3.16795	NO	protein_coding
MRPL45	-0.438689	4.22666	15.6246	7.72433e-05	0.000681194	3.16673	NO	protein_coding
RAD1	-0.453343	4.78485	15.6215	7.73689e-05	0.000681911	3.16627	NO	protein_coding
ACP2	0.466331	4.96809	15.613	7.77172e-05	0.000684588	3.16457	NO	protein_coding
ARL6IP1	0.745203	6.58752	15.6115	7.77804e-05	0.000684753	3.16447	NO	protein_coding
PNPLA6	0.479164	6.70136	15.609	7.78811e-05	0.000685247	3.16415	NO	protein_coding
TRAPPC2	-0.442061	4.04946	15.5592	7.99619e-05	0.000703153	3.15295	NO	protein_coding
FAM171B	-0.709334	6.04567	15.5469	8.04847e-05	0.000707345	3.15037	NO	protein_coding
CHURC1	-0.498445	4.99897	15.5447	8.05757e-05	0.000707741	3.15013	NO	protein_coding
CCDC117	-0.469955	4.60378	15.5347	8.10031e-05	0.000710956	3.14816	NO	protein_coding
SORT1	-0.436989	7.04598	15.534	8.10342e-05	0.000710956	3.14816	NO	protein_coding
ARHGAP20	-0.901108	3.66527	15.5238	8.14727e-05	0.000714395	3.14606	NO	protein_coding
BDH2	-0.731841	4.21732	15.5184	8.17042e-05	0.000716017	3.14508	NO	protein_coding
H3C11	1.4924	3.80675	15.5107	8.20383e-05	0.000718536	3.14355	UP	protein_coding
OGFOD3	0.408817	4.52527	15.5054	8.2271e-05	0.000720163	3.14257	NO	protein_coding
CREB3L1	0.463215	8.35654	15.485	8.31638e-05	0.000727152	3.13838	NO	protein_coding
PDCD4	-0.627161	5.83133	15.4782	8.3464e-05	0.000728947	3.1373	NO	protein_coding
SH3PXD2B	-0.464765	6.61561	15.477	8.3516e-05	0.000728988	3.13728	NO	protein_coding
EMC10	0.357068	6.37976	15.4613	8.42126e-05	0.000734651	3.13392	NO	protein_coding
GPAA1	0.391595	6.23833	15.4583	8.43439e-05	0.00073538	3.13349	NO	protein_coding
SAMHD1	-0.438429	4.74123	15.4376	8.52748e-05	0.000743074	3.12897	NO	protein_coding
BAG3	0.552972	6.51943	15.4302	8.56072e-05	0.000745389	3.12762	NO	protein_coding
SIGMAR1	0.499537	5.67653	15.4296	8.56373e-05	0.000745389	3.12762	NO	protein_coding
RHOBTB1	-0.566596	4.75467	15.4242	8.58815e-05	0.000746755	3.12682	NO	protein_coding
ENSG00000284776	0.596149	2.84277	15.424	8.58914e-05	0.000746755	3.12682	NO	protein_coding
ZBTB10	-0.582348	4.72254	15.4144	8.63293e-05	0.000750138	3.12486	NO	protein_coding
KCNE3	-2.73357	-0.920461	15.4129	8.63979e-05	0.000750311	3.12476	DOWN	protein_coding
SINHCAF	-0.708353	4.27118	15.3792	8.79509e-05	0.000762936	3.11751	NO	protein_coding
FAM72B	1.23609	1.01087	15.378	8.80053e-05	0.000762977	3.11749	UP	protein_coding
TRAIP	1.81082	1.25041	15.3734	8.82206e-05	0.000764413	3.11667	UP	protein_coding
RPUSD3	0.355601	4.08138	15.3684	8.8455e-05	0.000765755	3.11591	NO	protein_coding
CCL2	-1.58342	5.17768	15.368	8.84751e-05	0.000765755	3.11591	DOWN	protein_coding
XIAP	-0.298356	6.22541	15.3656	8.85883e-05	0.000766304	3.1156	NO	protein_coding
FBXW2	-0.260757	6.46572	15.3531	8.91728e-05	0.000770927	3.11299	NO	protein_coding
BANP	0.65505	3.59382	15.3247	9.0524e-05	0.000781729	3.10694	NO	protein_coding
PNPLA8	-0.490972	4.8174	15.3128	9.10951e-05	0.000785888	3.10464	NO	protein_coding
ZFYVE16	-0.336629	6.04251	15.3124	9.11143e-05	0.000785888	3.10464	NO	protein_coding
PARD6G	-0.69664	3.70395	15.3115	9.11589e-05	0.000785888	3.10464	NO	protein_coding
MBD4	-0.436281	4.20937	15.2956	9.19299e-05	0.000792091	3.10123	NO	protein_coding
CHCHD1	0.709766	2.50414	15.2935	9.20331e-05	0.000792536	3.10098	NO	protein_coding
BCAT2	0.383068	4.3032	15.2892	9.22422e-05	0.000793892	3.10024	NO	protein_coding
NFXL1	-0.509621	4.24271	15.2857	9.24149e-05	0.000794933	3.09967	NO	protein_coding
SERPING1	-0.944325	4.28889	15.2844	9.24768e-05	0.000795022	3.09962	NO	protein_coding
PGPEP1	-0.527954	6.19743	15.2692	9.32225e-05	0.00080076	3.0965	NO	protein_coding
CDKN2B	-1.03745	4.40225	15.2687	9.32484e-05	0.00080076	3.0965	DOWN	protein_coding
SLC30A7	-0.408291	7.03074	15.2627	9.35469e-05	0.000802874	3.09535	NO	protein_coding
RALGPS1	-0.932337	1.40197	15.2567	9.38415e-05	0.000804953	3.09423	NO	protein_coding
TEK	-1.80367	5.3559	15.2133	9.60237e-05	0.000823213	3.08449	DOWN	protein_coding
ANTKMT	0.995705	2.67454	15.2068	9.63571e-05	0.000825522	3.08327	NO	protein_coding
EML2	0.512037	4.47915	15.2059	9.64023e-05	0.000825522	3.08327	NO	protein_coding
NFE2L2	-0.799911	6.9885	15.2035	9.65257e-05	0.000825676	3.08319	NO	protein_coding
PHC1	-0.608631	5.04567	15.1982	9.67965e-05	0.000827532	3.08222	NO	protein_coding
MBTD1	-0.477598	3.76606	15.1926	9.70821e-05	0.00082915	3.08137	NO	protein_coding
C16orf87	-0.481716	4.13196	15.1924	9.70935e-05	0.00082915	3.08137	NO	protein_coding
ANKRD11	0.294718	7.77874	15.18	9.77353e-05	0.000833477	3.07911	NO	protein_coding
MEF2A	-0.418252	6.0733	15.1794	9.77629e-05	0.000833477	3.07911	NO	protein_coding
ORC6	1.43863	2.66147	15.1734	9.80756e-05	0.00083568	3.07796	UP	protein_coding
SPART	-0.325226	6.12687	15.1713	9.81864e-05	0.000836161	3.07771	NO	protein_coding
RGPD2	2.2151	-0.16234	15.169	9.83066e-05	0.000836722	3.07742	UP	protein_coding
ELF1	-0.405298	5.42606	15.1498	9.93085e-05	0.000844781	3.07326	NO	protein_coding
POLE	1.0557	5.00232	15.1485	9.93765e-05	0.000844893	3.0732	UP	protein_coding
FTL	-0.674546	11.0803	15.143	9.9665e-05	0.000846877	3.07218	NO	protein_coding
LRRC20	-0.899006	2.65515	15.1358	0.00010005	0.000849675	3.07075	NO	protein_coding
MIB1	-0.346133	6.80112	15.1326	0.000100218	0.000850633	3.07026	NO	protein_coding
SCAF11	-0.250364	7.16247	15.1165	0.000101078	0.000857463	3.06678	NO	protein_coding
SLC28A3	1.14427	1.22264	15.1127	0.000101277	0.000858679	3.06617	UP	protein_coding
PPDPF	0.678389	6.71267	15.1111	0.000101366	0.00085896	3.06603	NO	protein_coding
FKBP1B	1.09372	1.16355	15.1077	0.00010155	0.000860039	3.06548	UP	protein_coding
FRZB	-1.94721	0.568879	15.0947	0.000102247	0.000865239	3.06286	DOWN	protein_coding
S100A3	1.03598	0.0704184	15.0942	0.000102276	0.000865239	3.06286	UP	protein_coding
NRIP3	0.731234	5.31029	15.089	0.000102557	0.000867144	3.06191	NO	protein_coding
PRDX6	-0.436899	8.24051	15.0755	0.000103297	0.000872918	3.05903	NO	protein_coding
PDE1A	-2.43329	0.317916	15.0715	0.000103514	0.000874274	3.05835	DOWN	protein_coding
DCUN1D1	-0.379246	5.75186	15.0512	0.000104634	0.00088324	3.05392	NO	protein_coding
SMC1A	0.606901	5.85729	15.0451	0.000104972	0.000885609	3.05276	NO	protein_coding
PLB1	-1.05964	0.810737	15.0413	0.000105182	0.000886898	3.05213	DOWN	protein_coding
DDR2	-0.515586	9.45425	15.0401	0.000105248	0.000886971	3.05209	NO	protein_coding
HS2ST1	-0.425963	5.96972	15.0299	0.000105823	0.000891324	3.04996	NO	protein_coding
B3GAT3	0.474843	4.74801	15.0281	0.000105922	0.000891666	3.0498	NO	protein_coding
MYO1B	-0.51352	7.82889	15.0223	0.000106246	0.000893904	3.04871	NO	protein_coding
YY1	-0.371538	6.46488	15.015	0.000106661	0.000896913	3.04725	NO	protein_coding
MPRIP	0.402692	8.26065	15.0133	0.000106757	0.000897228	3.0471	NO	protein_coding
RPL23	-0.390109	8.30939	15.0009	0.000107459	0.000902635	3.04449	NO	protein_coding
TBCB	0.448488	5.14484	14.9886	0.000108165	0.000908067	3.04188	NO	protein_coding
ZNF2	-0.598663	2.48681	14.9868	0.000108267	0.000908429	3.04171	NO	protein_coding
RFC2	0.91218	3.20672	14.9838	0.00010844	0.000909385	3.04125	NO	protein_coding
C2orf49	-0.461375	4.48495	14.9642	0.000109572	0.000918378	3.03698	NO	protein_coding
DNAAF5	0.325309	4.62012	14.9598	0.000109823	0.000919981	3.03622	NO	protein_coding
ECT2	0.849996	5.47682	14.9584	0.000109905	0.000920164	3.03613	NO	protein_coding
PFN1	0.412694	9.17575	14.949	0.000110456	0.000923655	3.03449	NO	protein_coding
LDAF1	-0.721422	4.64439	14.9486	0.000110478	0.000923655	3.03449	NO	protein_coding
GPR39	0.816974	1.96324	14.9482	0.000110502	0.000923655	3.03449	NO	protein_coding
CMTM6	-0.387289	6.60109	14.945	0.000110693	0.000924745	3.03398	NO	protein_coding
FAM72A	1.29479	1.03505	14.9428	0.000110817	0.000925284	3.03372	UP	protein_coding
XRCC3	1.31127	2.30036	14.9389	0.000111048	0.000926707	3.03306	UP	protein_coding
SCN4B	-1.33549	2.54972	14.9321	0.000111452	0.000929572	3.03172	DOWN	protein_coding
C6orf136	0.747728	2.29514	14.9269	0.000111756	0.000931599	3.03077	NO	protein_coding
DDRGK1	0.637998	4.05783	14.9098	0.000112773	0.000939393	3.02715	NO	protein_coding
PRDM11	-0.90095	2.35095	14.9092	0.000112813	0.000939393	3.02715	NO	protein_coding
ARHGEF39	1.4917	0.0292865	14.8864	0.000114184	0.000950295	3.02214	UP	protein_coding
PCMT1	0.604999	5.02047	14.8698	0.000115194	0.000958186	3.01855	NO	protein_coding
CDS2	-0.416436	6.29232	14.867	0.000115362	0.000959064	3.01815	NO	protein_coding
ZC3H4	0.566448	6.10906	14.8608	0.000115741	0.000961698	3.01696	NO	protein_coding
XRCC6	0.338054	7.60634	14.8574	0.000115951	0.000962916	3.01641	NO	protein_coding
KLHL7	-0.385534	4.81318	14.8487	0.000116487	0.000966847	3.01464	NO	protein_coding
CENPJ	0.868542	3.87547	14.8304	0.000117626	0.000975777	3.01065	NO	protein_coding
CCNJ	-0.7079	3.47491	14.826	0.000117897	0.000977358	3.00995	NO	protein_coding
PIGQ	0.4243	4.70013	14.8253	0.000117944	0.000977358	3.00995	NO	protein_coding
GPSM3	0.668188	2.06397	14.8171	0.000118459	0.000980467	3.00857	NO	protein_coding
DPP8	-0.270661	5.99496	14.8169	0.00011847	0.000980467	3.00857	NO	protein_coding
ARSI	-0.683094	3.81348	14.8162	0.00011851	0.000980467	3.00857	NO	protein_coding
CACUL1	-0.294414	6.07602	14.8144	0.000118627	0.000980903	3.00837	NO	protein_coding
COMMD3	-0.444058	3.97889	14.8126	0.000118743	0.000981334	3.00818	NO	protein_coding
ROMO1	0.636605	3.60815	14.8079	0.000119034	0.000983213	3.00735	NO	protein_coding
PLPPR3	-0.975154	2.27965	14.8054	0.000119192	0.00098399	3.00701	NO	protein_coding
ENOX1	-1.03617	1.94561	14.7983	0.000119641	0.000987164	3.00561	DOWN	protein_coding
FTH1	-0.780924	10.3244	14.7858	0.000120441	0.000992786	3.00314	NO	protein_coding
CORO1B	0.425634	6.23467	14.7738	0.000121209	0.000998494	3.00065	NO	protein_coding
PIK3CA	-0.357759	5.8943	14.761	0.000122035	0.00100406	2.99824	NO	protein_coding
RCAN3	0.486741	4.65835	14.7603	0.00012208	0.00100406	2.99824	NO	protein_coding
DCUN1D3	-0.33591	5.83989	14.7582	0.000122214	0.00100463	2.99799	NO	protein_coding
TMOD1	-1.53835	2.6369	14.7541	0.000122481	0.00100628	2.99728	DOWN	protein_coding
ADAMTS8	-3.0871	3.02914	14.7414	0.000123306	0.00101252	2.9946	DOWN	protein_coding
RNH1	0.445802	6.73116	14.7399	0.000123408	0.00101281	2.99447	NO	protein_coding
RFTN2	-1.88351	1.40865	14.7388	0.000123476	0.00101283	2.99446	DOWN	protein_coding
CCDC68	-1.18085	3.83921	14.7314	0.000123963	0.00101628	2.99299	DOWN	protein_coding
HABP4	0.697549	4.06992	14.7283	0.000124168	0.00101742	2.9925	NO	protein_coding
SRGAP2C	-0.31687	5.53005	14.7259	0.000124329	0.0010182	2.99217	NO	protein_coding
ITGB8	-1.50306	5.08996	14.7085	0.000125477	0.00102651	2.98864	DOWN	protein_coding
FBLIM1	-0.439883	6.69399	14.7008	0.000125994	0.00103019	2.98708	NO	protein_coding
RGS20	0.489671	3.44961	14.6948	0.000126391	0.00103289	2.98595	NO	protein_coding
FBXL7	0.322588	4.51913	14.6929	0.000126519	0.00103338	2.98574	NO	protein_coding
TDRP	-0.585956	3.01733	14.6918	0.000126593	0.00103344	2.98571	NO	protein_coding
UBA1	0.33582	8.42919	14.6893	0.000126766	0.0010343	2.98535	NO	protein_coding
TUBA1C	0.632458	8.43731	14.6872	0.000126904	0.00103488	2.98511	NO	protein_coding
ZNRF1	-0.436653	5.12813	14.6841	0.000127112	0.00103548	2.98486	NO	protein_coding
SPSB1	-0.657747	5.13221	14.6722	0.000127917	0.00104148	2.98235	NO	protein_coding
LBH	-1.31366	7.60122	14.6707	0.000128019	0.00104173	2.98224	DOWN	protein_coding
NDC1	0.85711	5.07141	14.6698	0.000128083	0.00104173	2.98224	NO	protein_coding
RPL27	0.894556	5.83253	14.6669	0.000128276	0.0010426	2.98188	NO	protein_coding
INA	1.2055	3.268	14.6662	0.000128325	0.0010426	2.98188	UP	protein_coding
CAST	0.437428	7.64904	14.6636	0.000128503	0.00104349	2.98151	NO	protein_coding
UBE2H	-0.62075	7.52023	14.6605	0.000128715	0.00104466	2.98103	NO	protein_coding
CCT7	0.378333	7.03267	14.6551	0.000129088	0.00104714	2.98	NO	protein_coding
IREB2	-0.306807	6.21652	14.6519	0.000129301	0.00104831	2.97951	NO	protein_coding
LRFN4	0.673211	4.62045	14.6448	0.00012979	0.00105128	2.97828	NO	protein_coding
DCAF16	-0.416546	5.19711	14.6439	0.000129853	0.00105128	2.97828	NO	protein_coding
MINDY2	-0.410115	6.06227	14.638	0.000130264	0.0010539	2.9772	NO	protein_coding
PLCB3	0.443692	5.92014	14.6357	0.000130419	0.00105459	2.97691	NO	protein_coding
HSDL1	-0.345142	4.44795	14.6312	0.000130735	0.0010566	2.97609	NO	protein_coding
ST6GALNAC6	-0.462031	5.63422	14.6236	0.000131259	0.00106027	2.97458	NO	protein_coding
CAPN15	0.662498	5.82063	14.6193	0.000131557	0.00106213	2.97382	NO	protein_coding
UTP14A	0.518589	3.87201	14.6146	0.000131891	0.00106426	2.97295	NO	protein_coding
RPS3	-0.394782	8.50098	14.6081	0.000132345	0.00106737	2.97169	NO	protein_coding
PRPF6	0.338481	5.92058	14.595	0.000133264	0.00107422	2.96891	NO	protein_coding
ANKRD10	-0.489849	4.79233	14.5839	0.000134055	0.00108002	2.96657	NO	protein_coding
TCHP	0.53701	3.18622	14.5821	0.000134183	0.00108049	2.96638	NO	protein_coding
CENPP	1.1014	1.49534	14.5736	0.000134786	0.00108478	2.96466	UP	protein_coding
IGDCC4	-0.756384	5.91165	14.5723	0.000134886	0.00108501	2.96456	NO	protein_coding
PPP1R2	-0.350663	5.34449	14.5708	0.000134988	0.00108526	2.96447	NO	protein_coding
ZBTB26	-0.504463	3.10696	14.5578	0.000135922	0.0010922	2.9617	NO	protein_coding
FAM131A	0.43589	3.99944	14.549	0.00013656	0.00109676	2.95989	NO	protein_coding
ARHGEF3	-1.15302	1.53238	14.5453	0.000136828	0.00109834	2.95926	DOWN	protein_coding
RPL32	-0.378272	8.13091	14.5437	0.000136949	0.00109873	2.95911	NO	protein_coding
CLPP	0.414065	4.28131	14.5399	0.000137223	0.00110036	2.95847	NO	protein_coding
PRRC2A	0.37604	8.71463	14.5372	0.000137418	0.00110084	2.95828	NO	protein_coding
GPALPP1	-0.497258	4.76729	14.5371	0.000137426	0.00110084	2.95828	NO	protein_coding
RAB1A	-0.300646	7.06012	14.5346	0.000137606	0.00110171	2.95793	NO	protein_coding
ZNF532	-0.462535	6.70053	14.5324	0.000137766	0.00110242	2.95765	NO	protein_coding
USF3	-0.469276	5.47916	14.5227	0.00013848	0.00110755	2.95564	NO	protein_coding
FJX1	0.807749	4.84194	14.5103	0.000139392	0.00111427	2.95301	NO	protein_coding
PLAUR	0.858015	6.48154	14.5059	0.00013972	0.00111608	2.9523	NO	protein_coding
HSP90AB1	0.386963	9.46139	14.5053	0.000139769	0.00111608	2.9523	NO	protein_coding
SQOR	-0.729503	4.94399	14.5043	0.000139837	0.00111608	2.9523	NO	protein_coding
H3C1	1.69465	2.88881	14.5014	0.000140053	0.00111723	2.95186	UP	protein_coding
SLC39A6	-0.465011	6.93356	14.496	0.000140459	0.00111988	2.95083	NO	protein_coding
H2AC20	0.786214	4.37853	14.4914	0.000140798	0.00112201	2.95	NO	protein_coding
WDHD1	0.910444	3.8251	14.4896	0.000140936	0.00112253	2.9498	NO	protein_coding
HNRNPH3	0.517569	5.64816	14.4837	0.00014138	0.00112548	2.94866	NO	protein_coding
SLC9A1	0.299719	6.85021	14.4771	0.000141871	0.0011288	2.94738	NO	protein_coding
VSTM2L	-1.09598	0.740514	14.463	0.000142941	0.00113632	2.9445	DOWN	protein_coding
SF3B2	0.431608	7.02839	14.4627	0.000142964	0.00113632	2.9445	NO	protein_coding
CD302	-1.0637	3.73055	14.4323	0.000145285	0.00115418	2.93773	DOWN	protein_coding
VEGFA	-0.905595	7.37047	14.423	0.000146006	0.00115931	2.9358	NO	protein_coding
PTPN23	0.492988	6.49094	14.4209	0.000146172	0.00116002	2.93553	NO	protein_coding
PLSCR4	-0.607772	3.60072	14.4126	0.00014682	0.00116457	2.93383	NO	protein_coding
NUP214	0.280845	6.37937	14.4086	0.000147127	0.00116625	2.93321	NO	protein_coding
KATNB1	0.435693	3.83751	14.4079	0.000147184	0.00116625	2.93321	NO	protein_coding
H4C1	1.6987	1.28055	14.4045	0.00014745	0.00116776	2.93265	UP	protein_coding
MVD	0.617301	4.64747	14.4013	0.000147698	0.00116851	2.93237	NO	protein_coding
RASSF1	0.485928	4.11283	14.3936	0.000148307	0.00117273	2.9308	NO	protein_coding
SLC2A12	-1.03784	3.6014	14.3862	0.000148892	0.00117654	2.92939	DOWN	protein_coding
USP12	-0.385179	5.43562	14.3855	0.000148941	0.00117654	2.92939	NO	protein_coding
AP3S2	-0.392115	4.94594	14.3844	0.000149031	0.00117659	2.92937	NO	protein_coding
CHTOP	0.32515	5.15464	14.3835	0.000149102	0.00117659	2.92937	NO	protein_coding
MFSD10	0.439686	5.41715	14.3679	0.000150343	0.00118456	2.92644	NO	protein_coding
PITRM1	0.454108	6.64811	14.3647	0.000150596	0.00118596	2.92593	NO	protein_coding
AHNAK2	0.730694	7.33325	14.3599	0.000150982	0.00118838	2.92504	NO	protein_coding
GPBP1	-0.345624	5.6987	14.3559	0.000151303	0.00119015	2.9244	NO	protein_coding
NTPCR	-0.535651	4.55508	14.3552	0.000151362	0.00119015	2.9244	NO	protein_coding
AZIN1	-0.351849	7.51647	14.3533	0.000151517	0.00119077	2.92417	NO	protein_coding
FUCA2	0.444887	6.82323	14.3513	0.000151677	0.00119141	2.92394	NO	protein_coding
MINAR1	-0.830323	1.64619	14.3338	0.000153093	0.00120192	2.92012	NO	protein_coding
HSPE1	0.584465	4.44382	14.3308	0.000153332	0.00120319	2.91967	NO	protein_coding
APLN	1.99733	-0.552153	14.3289	0.000153492	0.00120383	2.91944	UP	protein_coding
OXCT1	0.373195	5.29671	14.3136	0.000154747	0.00121305	2.91612	NO	protein_coding
RYBP	-0.587011	4.98759	14.2965	0.000156156	0.00122347	2.91241	NO	protein_coding
MPHOSPH6	-0.477211	3.97071	14.292	0.000156531	0.00122579	2.91158	NO	protein_coding
SNN	-0.583231	4.18649	14.2896	0.000156728	0.0012267	2.91126	NO	protein_coding
ZNF264	-0.289149	5.63058	14.2845	0.000157151	0.00122939	2.91031	NO	protein_coding
GABPA	-0.32538	5.24402	14.2809	0.000157456	0.00123115	2.90969	NO	protein_coding
SSNA1	0.502656	4.0395	14.2587	0.000159322	0.00124511	2.90479	NO	protein_coding
CYB5R3	0.49186	8.16151	14.2562	0.000159533	0.00124613	2.90444	NO	protein_coding
ALDH1L2	-0.882315	7.52068	14.2482	0.000160216	0.00125083	2.9028	NO	protein_coding
NDUFA6	0.545635	4.46382	14.2376	0.000161122	0.00125726	2.90057	NO	protein_coding
PPM1A	-0.328527	5.89767	14.2345	0.000161382	0.00125865	2.90009	NO	protein_coding
RBM19	0.428168	5.29087	14.2323	0.000161573	0.00125946	2.89981	NO	protein_coding
DYM	-0.360757	5.13788	14.2314	0.00016165	0.00125946	2.89981	NO	protein_coding
PIK3R3	-0.670492	5.00509	14.2278	0.00016196	0.00126066	2.8994	NO	protein_coding
EZH2	1.32915	3.58431	14.2277	0.000161968	0.00126066	2.8994	UP	protein_coding
NLRP1	0.378038	6.01649	14.1955	0.000164764	0.00128048	2.89263	NO	protein_coding
CAND1	-0.2565	7.4945	14.1944	0.000164858	0.00128057	2.8926	NO	protein_coding
DNM1	-0.545331	5.37483	14.1915	0.000165117	0.00128193	2.89214	NO	protein_coding
ACVR2A	-0.419565	3.46573	14.1886	0.00016537	0.00128301	2.89177	NO	protein_coding
CLASP2	0.423799	5.47734	14.1818	0.000165965	0.00128657	2.89057	NO	protein_coding
PTP4A3	-1.33457	0.33941	14.1772	0.000166375	0.0012891	2.88971	DOWN	protein_coding
SH3YL1	-0.568985	4.2068	14.1718	0.000166854	0.00129215	2.88869	NO	protein_coding
CDC37	0.455133	7.21492	14.1617	0.00016775	0.00129818	2.88667	NO	protein_coding
BUD23	0.411648	4.43245	14.1608	0.00016783	0.00129818	2.88667	NO	protein_coding
C5orf22	-0.40548	4.65137	14.1594	0.000167959	0.00129818	2.88667	NO	protein_coding
MAP3K7	-0.306607	6.26537	14.1592	0.000167969	0.00129818	2.88667	NO	protein_coding
TMEM164	-0.472782	4.65349	14.1544	0.000168402	0.00130087	2.88577	NO	protein_coding
RBM18	-0.363003	4.65204	14.1462	0.000169136	0.00130522	2.88431	NO	protein_coding
CLIP4	-0.34912	6.61536	14.1444	0.000169301	0.00130584	2.88411	NO	protein_coding
GNAL	-1.20906	-0.200118	14.1422	0.000169499	0.00130617	2.884	DOWN	protein_coding
C1orf52	-0.377135	3.79629	14.142	0.000169514	0.00130617	2.884	NO	protein_coding
SCML1	-0.588847	4.02091	14.1336	0.000170277	0.00131123	2.88232	NO	protein_coding
KLF11	-0.921332	3.11464	14.1329	0.000170341	0.00131123	2.88232	NO	protein_coding
C14orf119	-0.374147	5.41475	14.127	0.000170877	0.00131428	2.88131	NO	protein_coding
CISD3	0.406414	3.40189	14.1259	0.000170973	0.00131428	2.88131	NO	protein_coding
GRHPR	0.361298	5.55773	14.1257	0.000170993	0.00131428	2.88131	NO	protein_coding
TBC1D14	-0.308665	5.68414	14.1134	0.000172111	0.00132221	2.8787	NO	protein_coding
GMCL1	-0.427528	3.54033	14.1061	0.000172781	0.0013267	2.87723	NO	protein_coding
CRIM1	0.419509	9.86369	14.1026	0.000173108	0.00132854	2.87663	NO	protein_coding
STK4	-0.277701	5.97003	14.093	0.000173991	0.00133465	2.87463	NO	protein_coding
PDE4DIP	-0.525273	7.63112	14.0913	0.000174146	0.00133499	2.87452	NO	protein_coding
NEURL1	1.28648	0.408805	14.0906	0.000174209	0.00133499	2.87452	UP	protein_coding
RAB8A	0.342728	6.03381	14.085	0.000174729	0.00133831	2.87344	NO	protein_coding
KCTD17	0.448285	3.77484	14.0778	0.000175405	0.00134282	2.87198	NO	protein_coding
RABL2A	-0.797418	2.96717	14.0726	0.000175889	0.00134586	2.871	NO	protein_coding
CNOT6	-0.381237	5.42359	14.0586	0.000177198	0.00135457	2.8682	NO	protein_coding
YES1	-0.330638	6.2402	14.0577	0.000177287	0.00135457	2.8682	NO	protein_coding
PSMD3	0.50331	6.72496	14.0576	0.000177292	0.00135457	2.8682	NO	protein_coding
PHF19	0.811916	4.31399	14.0374	0.000179208	0.00136785	2.86396	NO	protein_coding
SYNE1	0.781478	8.04758	14.0357	0.000179368	0.0013684	2.86379	NO	protein_coding
AMOTL1	-0.380217	7.58181	14.0279	0.000180119	0.00137344	2.86219	NO	protein_coding
PAQR4	1.21405	2.73647	14.0227	0.000180617	0.00137605	2.86137	UP	protein_coding
TTF2	0.574862	4.30454	14.0178	0.000181093	0.00137881	2.86049	NO	protein_coding
DCHS1	-0.904521	6.28029	14.0146	0.0001814	0.00138047	2.85997	NO	protein_coding
ATP10A	1.01412	5.57824	14.0109	0.000181755	0.00138249	2.85934	UP	protein_coding
CCDC137	0.538076	3.77794	14.0048	0.000182347	0.0013863	2.85814	NO	protein_coding
TMEM243	-0.498734	3.00362	13.9879	0.000183987	0.00139808	2.85447	NO	protein_coding
PSMD9	0.297365	4.56471	13.9833	0.000184437	0.00140055	2.8537	NO	protein_coding
ANKRD54	0.501259	4.13397	13.9828	0.000184493	0.00140055	2.8537	NO	protein_coding
KIAA1586	-0.439384	4.22683	13.9762	0.000185144	0.00140479	2.85239	NO	protein_coding
PLD1	-0.754267	4.32598	13.9639	0.000186352	0.00141259	2.84998	NO	protein_coding
GEM	-0.687774	4.31915	13.9639	0.000186356	0.00141259	2.84998	NO	protein_coding
CSTF2	0.541016	3.68476	13.9604	0.000186698	0.00141449	2.8494	NO	protein_coding
ARRDC4	-1.47763	4.80337	13.9584	0.000186898	0.00141531	2.84915	DOWN	protein_coding
RNF11	-0.350519	6.69273	13.957	0.000187036	0.00141566	2.84904	NO	protein_coding
PHEX	-1.38942	0.0706198	13.9552	0.000187216	0.00141632	2.84884	DOWN	protein_coding
SLC35E2B	-0.538572	6.71482	13.9542	0.000187323	0.00141643	2.8488	NO	protein_coding
GOLGA8B	-0.529477	5.45327	13.9532	0.000187421	0.00141648	2.84879	NO	protein_coding
MCAM	0.534083	6.61355	13.9498	0.000187755	0.00141831	2.84823	NO	protein_coding
TUBB2A	0.623518	6.22954	13.9422	0.000188514	0.00142334	2.84669	NO	protein_coding
NEDD9	-0.801425	5.5509	13.9184	0.000190917	0.00144078	2.8414	NO	protein_coding
SCAMP3	0.499068	5.73927	13.9174	0.000191021	0.00144085	2.84138	NO	protein_coding
GPC4	-1.07522	1.67614	13.9079	0.000191989	0.00144745	2.8394	DOWN	protein_coding
TANGO2	0.400247	4.59201	13.9018	0.000192614	0.00145145	2.8382	NO	protein_coding
ORMDL1	-0.454662	5.45832	13.8913	0.00019369	0.00145812	2.83621	NO	protein_coding
KIAA2013	0.424298	5.77789	13.8887	0.000193965	0.00145948	2.8358	NO	protein_coding
TCEAL7	-0.616427	3.46589	13.8855	0.000194287	0.00146119	2.83529	NO	protein_coding
KCTD20	-0.456644	6.59888	13.8816	0.000194699	0.00146357	2.83459	NO	protein_coding
RPS6KC1	-0.300134	5.55858	13.8768	0.000195197	0.0014666	2.83369	NO	protein_coding
CEP95	-0.618923	3.19905	13.8683	0.000196074	0.00147247	2.83195	NO	protein_coding
MMS22L	0.870091	4.40948	13.8637	0.000196562	0.00147542	2.83109	NO	protein_coding
SLC35G1	-0.485966	2.37381	13.8613	0.000196814	0.00147606	2.8309	NO	protein_coding
HSD17B2	-2.51575	0.958024	13.861	0.00019684	0.00147606	2.8309	DOWN	protein_coding
PAPOLG	-0.407955	4.26466	13.8596	0.000196986	0.00147643	2.83079	NO	protein_coding
RTKN2	-0.979622	2.01934	13.8544	0.000197534	0.00147982	2.82979	NO	protein_coding
SEC23B	0.407345	5.45562	13.8481	0.000198194	0.0014838	2.82862	NO	protein_coding
SCARF2	0.78174	6.37454	13.8475	0.000198259	0.0014838	2.82862	NO	protein_coding
ATP5ME	0.778768	2.83429	13.844	0.000198631	0.00148587	2.82802	NO	protein_coding
NHP2	0.63384	4.2799	13.8385	0.000199212	0.00148912	2.82707	NO	protein_coding
ATXN3	-0.516207	4.24973	13.8381	0.000199259	0.00148912	2.82707	NO	protein_coding
DPY19L4	-0.302941	5.78734	13.8357	0.000199506	0.00149024	2.82674	NO	protein_coding
WAC	-0.336778	6.83568	13.8313	0.000199974	0.00149301	2.82594	NO	protein_coding
RASL11A	-1.52128	1.4317	13.8251	0.000200634	0.00149721	2.82472	DOWN	protein_coding
CAMK1G	1.18813	1.44784	13.8071	0.000202572	0.00151029	2.82094	UP	protein_coding
DNAJC9	0.986079	4.03812	13.807	0.000202583	0.00151029	2.82094	NO	protein_coding
TP53BP1	-0.36238	7.06505	13.8004	0.000203298	0.00151421	2.81981	NO	protein_coding
ENSG00000241489	-0.670295	3.59443	13.8003	0.000203305	0.00151421	2.81981	NO	protein_coding
NANP	-0.477358	3.69546	13.7503	0.000208783	0.00155332	2.80874	NO	protein_coding
IVNS1ABP	-0.486622	5.48728	13.7474	0.000209114	0.00155446	2.80842	NO	protein_coding
TRMT10C	-0.418727	3.87564	13.7445	0.000209434	0.00155609	2.80797	NO	protein_coding
SH2D5	0.978453	4.45603	13.7396	0.000209985	0.00155943	2.80704	NO	protein_coding
DOCK10	0.497897	6.51992	13.7378	0.000210183	0.00156014	2.80684	NO	protein_coding
SMS	0.419648	7.0038	13.7327	0.000210751	0.00156361	2.80587	NO	protein_coding
CD46	-0.331497	7.7227	13.7237	0.000211764	0.00156955	2.80422	NO	protein_coding
SUCLG1	0.336907	4.81472	13.723	0.000211842	0.00156955	2.80422	NO	protein_coding
TUBB	0.339937	10.4299	13.7229	0.000211859	0.00156955	2.80422	NO	protein_coding
TMEM52B	-1.24966	1.75857	13.7219	0.000211971	0.00156962	2.8042	DOWN	protein_coding
MAP7D1	0.46647	7.58021	13.71	0.000213321	0.00157885	2.80166	NO	protein_coding
C1QTNF2	1.30124	0.928015	13.7091	0.000213421	0.00157885	2.80166	UP	protein_coding
MON1A	0.520503	3.50345	13.7021	0.000214212	0.00158393	2.80026	NO	protein_coding
VHL	-0.378986	5.25235	13.6999	0.000214468	0.00158506	2.79995	NO	protein_coding
BTG3	-0.475516	4.54637	13.6917	0.000215401	0.00159119	2.79828	NO	protein_coding
H2AZ1	0.902804	6.0675	13.6813	0.000216603	0.00159854	2.79628	NO	protein_coding
VASH2	-2.53009	1.39112	13.6797	0.000216791	0.00159906	2.79614	DOWN	protein_coding
NAXD	-0.3569	4.41905	13.6789	0.000216882	0.00159906	2.79614	NO	protein_coding
RBM44	-1.16628	0.0261273	13.6508	0.000220143	0.00162233	2.78986	DOWN	protein_coding
TUBB6	0.492224	8.04961	13.6425	0.000221127	0.0016288	2.78813	NO	protein_coding
MRPS24	0.433574	5.21656	13.6367	0.00022181	0.00163305	2.787	NO	protein_coding
CHPF	0.685535	7.45374	13.6347	0.000222047	0.00163401	2.78674	NO	protein_coding
ZNF668	0.586965	3.98219	13.6284	0.000222789	0.00163804	2.78567	NO	protein_coding
ZFAND6	-0.379995	5.20137	13.6282	0.000222808	0.00163804	2.78567	NO	protein_coding
NAT10	0.343971	5.57007	13.6254	0.000223151	0.00163924	2.78536	NO	protein_coding
UMAD1	-0.555108	2.71605	13.6251	0.000223185	0.00163924	2.78536	NO	protein_coding
NUDT4	-0.30221	6.90362	13.6228	0.000223459	0.00163997	2.78516	NO	protein_coding
RHOB	0.473297	6.58488	13.6225	0.000223496	0.00163997	2.78516	NO	protein_coding
HOOK3	-0.239223	7.25721	13.6073	0.000225312	0.0016525	2.78186	NO	protein_coding
VEGFC	0.7524	6.09051	13.6003	0.000226155	0.0016579	2.78044	NO	protein_coding
WDR18	0.496542	4.08696	13.5959	0.000226677	0.00166093	2.77965	NO	protein_coding
MAML3	-0.660827	3.28086	13.5921	0.000227143	0.00166276	2.77917	NO	protein_coding
EHBP1L1	0.477255	5.82106	13.5905	0.000227332	0.00166336	2.77901	NO	protein_coding
SLC4A1AP	0.342733	4.58486	13.5829	0.000228259	0.00166934	2.77746	NO	protein_coding
ENO1	0.493796	9.82429	13.5815	0.00022843	0.00166979	2.77734	NO	protein_coding
NDUFS5	0.646179	4.2558	13.5806	0.000228538	0.00166979	2.77734	NO	protein_coding
RAC2	0.570364	5.1131	13.5755	0.000229158	0.00167274	2.77657	NO	protein_coding
CCNB1IP1	-0.609453	3.53722	13.5616	0.000230865	0.001684	2.77366	NO	protein_coding
USP3	-0.390396	4.93396	13.5611	0.00023092	0.001684	2.77366	NO	protein_coding
ANK2	-0.811656	3.73057	13.5587	0.000231215	0.00168535	2.77331	NO	protein_coding
CSF1	-0.725302	6.23283	13.5575	0.00023137	0.00168568	2.77322	NO	protein_coding
DR1	-0.294545	6.47168	13.5548	0.000231703	0.00168703	2.77288	NO	protein_coding
C11orf87	0.931778	0.174042	13.5542	0.000231775	0.00168703	2.77288	NO	protein_coding
SERPINB2	1.94851	6.79236	13.5468	0.000232691	0.0016929	2.77137	UP	protein_coding
TTC1	0.321802	4.80352	13.5458	0.000232807	0.00169294	2.77136	NO	protein_coding
EEFSEC	0.531968	2.80464	13.5423	0.000233244	0.00169532	2.77075	NO	protein_coding
INF2	0.501396	7.31161	13.5376	0.000233832	0.00169879	2.76986	NO	protein_coding
TMEM68	-0.436868	4.02089	13.5294	0.000234857	0.00170463	2.76837	NO	protein_coding
AEBP2	-0.335657	5.18046	13.5181	0.000236278	0.00171413	2.76596	NO	protein_coding
KLHDC7B	-2.73626	-0.207686	13.5156	0.000236591	0.00171559	2.76559	DOWN	protein_coding
ANGPTL2	-1.19392	6.66627	13.5028	0.000238204	0.00172648	2.76284	DOWN	protein_coding
ASPN	-2.044	-0.182529	13.4835	0.000240676	0.00174275	2.75877	DOWN	protein_coding
FAM111B	2.20885	2.55713	13.4818	0.000240893	0.0017435	2.75858	UP	protein_coding
GOLPH3	-0.373618	6.35964	13.4791	0.000241232	0.00174513	2.75817	NO	protein_coding
IQGAP1	0.414994	9.14476	13.4773	0.000241464	0.00174564	2.75804	NO	protein_coding
LARP1	0.314154	8.71175	13.4768	0.00024153	0.00174564	2.75804	NO	protein_coding
TELO2	0.76844	4.68812	13.4756	0.00024169	0.00174574	2.75802	NO	protein_coding
MAN1A1	-0.802035	6.03981	13.4749	0.00024177	0.00174574	2.75802	NO	protein_coding
SLC25A10	0.942931	2.01365	13.469	0.000242536	0.00174963	2.75705	NO	protein_coding
BEST1	-0.909447	2.66989	13.4578	0.00024399	0.00175847	2.75486	NO	protein_coding
TRANK1	-0.805641	5.89273	13.4578	0.000243991	0.00175847	2.75486	NO	protein_coding
EDNRA	-0.435454	4.32212	13.4543	0.000244444	0.00176091	2.75426	NO	protein_coding
EMP3	0.596912	6.7841	13.437	0.000246712	0.00177642	2.75045	NO	protein_coding
VMA21	-0.413675	5.93001	13.433	0.00024723	0.00177891	2.74984	NO	protein_coding
GAS2L3	1.09622	4.11539	13.4326	0.00024729	0.00177891	2.74984	UP	protein_coding
ALG3	0.50473	4.57123	13.4292	0.000247737	0.00178129	2.74926	NO	protein_coding
UCHL1	-0.408321	8.16026	13.4221	0.000248678	0.00178548	2.74825	NO	protein_coding
ZNF277	-0.570997	3.93509	13.4218	0.000248723	0.00178548	2.74825	NO	protein_coding
MFAP5	2.32662	0.391293	13.4213	0.000248783	0.00178548	2.74825	UP	protein_coding
PBX1	-1.12123	5.86965	13.407	0.000250689	0.00179748	2.74534	DOWN	protein_coding
HS3ST3A1	0.714746	4.86885	13.4051	0.000250944	0.00179847	2.7451	NO	protein_coding
ERO1B	-0.597193	2.60877	13.3991	0.000251738	0.00180332	2.74393	NO	protein_coding
GMFG	2.97557	-0.633283	13.3967	0.000252074	0.00180489	2.74355	UP	protein_coding
MT.ND3	1.29331	6.96644	13.3885	0.000253169	0.00181189	2.74187	UP	protein_coding
RASL10B	-0.796645	3.19422	13.3819	0.000254062	0.00181743	2.74054	NO	protein_coding
NDUFAF2	0.880603	2.20273	13.3745	0.000255063	0.00182374	2.73904	NO	protein_coding
ACAD8	-0.437198	3.80635	13.3643	0.00025646	0.00183288	2.73687	NO	protein_coding
PLCH2	1.66562	1.69284	13.3517	0.000258185	0.00184435	2.73416	UP	protein_coding
TRIM47	-0.892235	3.23905	13.3495	0.000258498	0.00184573	2.73383	NO	protein_coding
UCP2	0.934073	2.9851	13.3408	0.000259691	0.00185339	2.73203	NO	protein_coding
RPL9	-0.358869	7.68154	13.3363	0.000260324	0.00185652	2.7313	NO	protein_coding
ARHGEF10L	0.434464	4.66214	13.3359	0.000260371	0.00185652	2.7313	NO	protein_coding
HNRNPA2B1	0.458375	8.18127	13.3346	0.000260553	0.00185695	2.7312	NO	protein_coding
FGL2	-3.55777	3.21926	13.3326	0.00026083	0.00185796	2.73096	DOWN	protein_coding
HACD4	-0.795997	3.6084	13.3319	0.000260936	0.00185796	2.73096	NO	protein_coding
HSPD1	0.442106	7.46289	13.3295	0.000261264	0.00185943	2.73062	NO	protein_coding
IER2	0.640539	5.20293	13.3256	0.000261803	0.001862	2.73002	NO	protein_coding
TANK	-0.442245	4.95943	13.3249	0.000261909	0.001862	2.73002	NO	protein_coding
SMAD9	-0.818061	4.59321	13.324	0.000262024	0.001862	2.73002	NO	protein_coding
CORO6	-0.69879	3.09871	13.3234	0.000262108	0.001862	2.73002	NO	protein_coding
MED24	0.33756	5.57508	13.3042	0.000264813	0.00188035	2.72576	NO	protein_coding
UBE2F	-0.438158	4.79044	13.2969	0.000265839	0.00188676	2.72428	NO	protein_coding
THBD	2.24583	-0.827898	13.2854	0.000267477	0.00189663	2.72202	UP	protein_coding
EHD3	-0.916213	5.96343	13.2796	0.000268309	0.00190165	2.72087	NO	protein_coding
OTUB1	0.305074	5.58329	13.2777	0.000268583	0.00190272	2.72063	NO	protein_coding
ISOC1	-0.57892	3.17855	13.2657	0.000270307	0.00191405	2.71805	NO	protein_coding
ZNF250	-0.461041	2.66731	13.2545	0.000271929	0.00192377	2.71585	NO	protein_coding
RBBP4	-0.403383	6.65475	13.2435	0.000273521	0.00193325	2.71371	NO	protein_coding
UBXN4	-0.262491	7.12056	13.2423	0.000273698	0.00193361	2.71363	NO	protein_coding
TXNRD2	0.439647	3.99478	13.241	0.000273896	0.00193413	2.71352	NO	protein_coding
ZNF140	-0.498724	3.29748	13.2162	0.00027754	0.00195806	2.70817	NO	protein_coding
FPGS	0.323502	5.10184	13.2122	0.000278129	0.00196131	2.70745	NO	protein_coding
SPRYD3	0.601528	5.32869	13.2004	0.000279891	0.00197283	2.70491	NO	protein_coding
ARL6IP4	0.52568	4.62334	13.1944	0.00028078	0.00197819	2.70373	NO	protein_coding
ZMAT5	0.403427	3.15065	13.1867	0.000281941	0.00198547	2.70214	NO	protein_coding
AFG2A	0.750829	4.25934	13.1734	0.000283945	0.00199775	2.69946	NO	protein_coding
DSE	-0.306811	7.1521	13.1725	0.000284087	0.00199783	2.69944	NO	protein_coding
FLOT1	0.404147	6.65532	13.1655	0.000285148	0.00200438	2.69802	NO	protein_coding
DHRS4	0.464767	2.94217	13.1476	0.00028788	0.00202266	2.69408	NO	protein_coding
ZNF726	1.6054	-0.205276	13.1375	0.000289441	0.00203199	2.69208	UP	protein_coding
TMPO	1.04547	5.80811	13.1373	0.000289472	0.00203199	2.69208	UP	protein_coding
NRBF2	-0.396391	4.49796	13.1357	0.000289716	0.00203277	2.69191	NO	protein_coding
NELFA	0.351478	3.98733	13.1312	0.000290411	0.00203672	2.69107	NO	protein_coding
ZNF740	-0.495647	4.79302	13.1274	0.000291016	0.00204003	2.69036	NO	protein_coding
PPP6R1	0.491734	6.83671	13.1264	0.000291162	0.00204013	2.69034	NO	protein_coding
DRP2	0.562775	5.25156	13.1175	0.000292554	0.00204895	2.68847	NO	protein_coding
GMNN	0.975174	2.9306	13.1112	0.000293535	0.00205488	2.68721	NO	protein_coding
FKBP7	-0.543896	4.61726	13.1095	0.000293804	0.00205489	2.68721	NO	protein_coding
YBX1	0.607789	8.05727	13.1039	0.000294687	0.00206011	2.68611	NO	protein_coding
TACC2	0.468747	4.16784	13.103	0.000294818	0.00206011	2.68611	NO	protein_coding
HCFC1	0.496842	7.46059	13.0973	0.000295726	0.00206552	2.68497	NO	protein_coding
ABCC5	-0.53115	5.73443	13.0856	0.000297568	0.00207673	2.68262	NO	protein_coding
PGAP1	-0.560545	4.90326	13.0854	0.000297602	0.00207673	2.68262	NO	protein_coding
PSG4	1.21262	-0.315997	13.0835	0.000297908	0.00207792	2.68237	UP	protein_coding
ZNF511	0.501715	3.05192	13.0732	0.000299552	0.00208845	2.68018	NO	protein_coding
SOCS4	-0.393062	5.89371	13.0695	0.000300139	0.00209137	2.67957	NO	protein_coding
SLC36A4	-0.472773	4.50692	13.0689	0.000300244	0.00209137	2.67957	NO	protein_coding
LRRN3	0.66705	4.9275	13.0658	0.000300734	0.00209384	2.67906	NO	protein_coding
PARD3	-0.34461	5.35642	13.065	0.000300871	0.00209384	2.67906	NO	protein_coding
CACTIN	0.424055	4.64914	13.063	0.000301183	0.00209507	2.6788	NO	protein_coding
OLFM2	-2.01283	0.795119	13.0368	0.000305429	0.00212364	2.67292	DOWN	protein_coding
ATOSB	0.571825	5.52668	13.0354	0.000305662	0.0021243	2.67278	NO	protein_coding
THOC5	-0.220539	5.61002	13.0322	0.000306188	0.002127	2.67223	NO	protein_coding
RC3H1	-0.348093	6.61948	13.0255	0.000307281	0.00213362	2.67088	NO	protein_coding
PFAS	0.704965	5.20956	13.0236	0.000307586	0.00213478	2.67065	NO	protein_coding
VDR	0.492439	4.98109	13.0214	0.000307952	0.00213635	2.67033	NO	protein_coding
HELLS	1.21403	5.11673	13.0193	0.000308303	0.00213783	2.67003	UP	protein_coding
COQ10B	-0.42903	5.17397	13.0184	0.000308444	0.00213784	2.67002	NO	protein_coding
PRKACA	0.359385	6.24397	13.0176	0.000308584	0.00213785	2.67002	NO	protein_coding
POLA1	0.804077	3.62501	13.0137	0.000309226	0.00214133	2.66932	NO	protein_coding
ZWILCH	0.832665	4.24007	13.0117	0.000309551	0.00214262	2.66906	NO	protein_coding
SAYSD1	-0.502824	3.40401	13.0075	0.000310251	0.00214649	2.66827	NO	protein_coding
ENPP1	0.655153	6.07123	13.0055	0.000310578	0.00214779	2.66801	NO	protein_coding
EVI5	-0.415119	6.34148	13.0011	0.000311306	0.00215186	2.66719	NO	protein_coding
FAM118A	-0.507106	3.48984	12.9968	0.000312031	0.0021559	2.66637	NO	protein_coding
SEMA4D	-2.57326	0.721443	12.9907	0.000313035	0.00216187	2.66517	DOWN	protein_coding
IL18R1	-1.88265	0.119988	12.9894	0.000313261	0.00216246	2.66505	DOWN	protein_coding
SCYL2	-0.287489	6.57489	12.9871	0.000313649	0.00216416	2.66471	NO	protein_coding
LRRC17	-0.901842	7.6826	12.9818	0.000314538	0.00216933	2.66368	NO	protein_coding
DIAPH1	0.609425	6.93806	12.9737	0.000315902	0.00217776	2.66199	NO	protein_coding
CDK2	0.774113	4.98188	12.9619	0.000317892	0.00218974	2.65961	NO	protein_coding
FOXRED2	0.57855	4.3691	12.9617	0.000317925	0.00218974	2.65961	NO	protein_coding
POLD2	0.476023	5.74202	12.9576	0.000318631	0.00219362	2.65884	NO	protein_coding
TSPAN4	0.539953	6.33752	12.9542	0.000319212	0.00219664	2.65824	NO	protein_coding
B4GALT5	-0.510833	5.54017	12.9531	0.000319391	0.00219689	2.65819	NO	protein_coding
ZSWIM5	1.75295	-0.649867	12.9517	0.000319637	0.00219759	2.65805	UP	protein_coding
S100A10	0.526486	6.60445	12.9499	0.000319936	0.00219866	2.65784	NO	protein_coding
FAM91A1	-0.279344	6.49025	12.9238	0.000324425	0.00222852	2.65198	NO	protein_coding
ARFGEF3	1.72631	0.125047	12.9217	0.000324787	0.00223001	2.65169	UP	protein_coding
PNPLA2	0.43226	6.20231	12.9127	0.000326354	0.00223977	2.6498	NO	protein_coding
SLC25A22	0.586325	4.78789	12.9113	0.000326601	0.00224046	2.64966	NO	protein_coding
RAD23A	0.331604	6.15782	12.9021	0.000328218	0.00224988	2.64784	NO	protein_coding
SH3RF3	-0.354812	5.45169	12.9018	0.000328266	0.00224988	2.64784	NO	protein_coding
MAPK10	-0.945661	3.77835	12.8942	0.000329607	0.00225807	2.64626	NO	protein_coding
TESMIN	1.02257	0.213425	12.8897	0.000330401	0.0022625	2.64541	UP	protein_coding
CKAP5	0.307516	7.568	12.8859	0.00033106	0.00226545	2.64485	NO	protein_coding
HBP1	-0.630378	5.4512	12.8856	0.000331127	0.00226545	2.64485	NO	protein_coding
TOR4A	0.625353	6.5323	12.8806	0.000332001	0.00227042	2.64389	NO	protein_coding
NAP1L1	-0.323751	8.15584	12.8769	0.000332661	0.00227393	2.64322	NO	protein_coding
SAR1A	-0.309686	7.58841	12.8756	0.000332889	0.00227447	2.64312	NO	protein_coding
TRIM55	0.671418	4.2206	12.8719	0.000333555	0.00227801	2.64245	NO	protein_coding
RHOJ	-0.733489	3.05278	12.8684	0.000334181	0.00228127	2.64182	NO	protein_coding
ABCD3	-0.346423	5.9887	12.8667	0.000334472	0.00228225	2.64164	NO	protein_coding
TRO	-0.762471	4.89647	12.8631	0.000335126	0.0022857	2.64098	NO	protein_coding
BMP4	-1.55547	3.71177	12.854	0.000336761	0.00229582	2.63906	DOWN	protein_coding
ELOF1	0.412598	4.44186	12.8517	0.000337176	0.00229764	2.63872	NO	protein_coding
ATAD5	1.45315	2.84477	12.8377	0.000339697	0.00231379	2.63568	UP	protein_coding
TRIM59	0.694214	5.11738	12.8325	0.000340646	0.00231923	2.63466	NO	protein_coding
C21orf58	1.20496	2.58353	12.8311	0.000340906	0.00231997	2.63452	UP	protein_coding
PEX10	0.35719	4.09343	12.8232	0.000342349	0.00232843	2.63294	NO	protein_coding
FCRLB	1.12022	0.540185	12.8226	0.000342451	0.00232843	2.63294	UP	protein_coding
AARSD1	0.474168	3.16831	12.82	0.000342925	0.00233041	2.63257	NO	protein_coding
SNRPF	0.735653	1.89339	12.8192	0.000343085	0.00233041	2.63257	NO	protein_coding
WNT5B	0.793238	7.21021	12.8179	0.000343313	0.00233041	2.63257	NO	protein_coding
UBE2B	-0.343219	5.00738	12.8177	0.000343349	0.00233041	2.63257	NO	protein_coding
CSAD	-0.510935	3.90969	12.8037	0.000345942	0.00234594	2.62968	NO	protein_coding
CLDN4	1.64441	0.134109	12.7947	0.0003476	0.00235615	2.6278	UP	protein_coding
FBLN1	-1.54379	7.40501	12.7864	0.000349151	0.00236561	2.62606	DOWN	protein_coding
TUB	-0.330406	5.27305	12.7818	0.000350011	0.00237039	2.62518	NO	protein_coding
OLR1	-1.12307	4.4456	12.7763	0.000351039	0.00237631	2.6241	DOWN	protein_coding
ATP2B4	0.725053	10.5494	12.7708	0.000352063	0.00238219	2.62302	NO	protein_coding
ATP8B4	-1.26433	0.869406	12.7687	0.000352468	0.00238306	2.62286	DOWN	protein_coding
KCNAB3	-0.950167	1.49496	12.7685	0.000352501	0.00238306	2.62286	NO	protein_coding
WWP1	-0.302673	4.97164	12.7615	0.000353832	0.0023909	2.62144	NO	protein_coding
GLIPR1	0.737403	8.37673	12.7607	0.000353972	0.0023909	2.62144	NO	protein_coding
NCBP2	-0.329927	5.95028	12.7584	0.000354407	0.00239279	2.62109	NO	protein_coding
MCM8	0.973954	3.7387	12.7484	0.00035632	0.00240465	2.61895	NO	protein_coding
DAGLB	0.632518	5.09636	12.7437	0.000357212	0.00240856	2.61824	NO	protein_coding
SYDE1	0.384831	6.49699	12.7403	0.000357864	0.0024119	2.61764	NO	protein_coding
TMEM120B	-0.350688	5.58585	12.7329	0.000359279	0.00241931	2.61631	NO	protein_coding
ZNF254	-0.499282	3.9947	12.7218	0.000361411	0.00243154	2.61412	NO	protein_coding
RUSC2	0.403716	6.86346	12.7203	0.000361699	0.00243241	2.61396	NO	protein_coding
DENND2D	-1.02602	0.745785	12.715	0.000362731	0.00243758	2.61304	DOWN	protein_coding
TXNIP	-1.76279	7.14757	12.7147	0.000362784	0.00243758	2.61304	DOWN	protein_coding
ZFP36	0.805333	4.06747	12.7093	0.000363845	0.00244257	2.61215	NO	protein_coding
TMEM101	0.471773	3.28185	12.7064	0.000364413	0.00244532	2.61166	NO	protein_coding
EPB41L3	0.602195	5.35195	12.7049	0.000364708	0.00244623	2.6115	NO	protein_coding
BMP1	-0.429113	6.70805	12.6837	0.000368851	0.00247294	2.60679	NO	protein_coding
DNM2	0.322129	7.05266	12.6829	0.000369013	0.00247295	2.60678	NO	protein_coding
ZNF521	-0.579927	4.65424	12.6775	0.000370076	0.00247899	2.60572	NO	protein_coding
SIPA1L2	-2.2239	3.87828	12.6762	0.000370334	0.00247964	2.60561	DOWN	protein_coding
PLA2G15	0.76363	4.97652	12.6743	0.000370719	0.00248114	2.60535	NO	protein_coding
ARB2A	-0.469426	5.26399	12.6721	0.000371156	0.00248298	2.60503	NO	protein_coding
JAG1	-0.598493	5.15218	12.6692	0.000371726	0.00248571	2.60455	NO	protein_coding
RBMS1	-0.338249	6.82719	12.6601	0.000373548	0.00249681	2.60261	NO	protein_coding
PIGO	0.359775	4.6387	12.6569	0.000374186	0.00249999	2.60206	NO	protein_coding
GGPS1	-0.342233	4.33376	12.6546	0.000374636	0.00250191	2.60173	NO	protein_coding
DIPK1A	-0.929549	5.21267	12.6494	0.000375693	0.00250729	2.6008	NO	protein_coding
IDH3B	0.384274	4.61958	12.649	0.000375767	0.00250729	2.6008	NO	protein_coding
SH3GLB1	-0.327383	6.87825	12.645	0.00037657	0.00251155	2.60006	NO	protein_coding
TRAM2	0.444481	8.90331	12.6202	0.000381604	0.00254403	2.59448	NO	protein_coding
PKN3	0.980968	1.98593	12.6157	0.000382528	0.00254908	2.59362	NO	protein_coding
SF3A2	0.516801	5.42992	12.6039	0.000384943	0.00256336	2.59119	NO	protein_coding
NAAA	0.727701	2.93332	12.6036	0.000385004	0.00256336	2.59119	NO	protein_coding
MXI1	-0.823435	3.95216	12.5969	0.000386381	0.00257142	2.58983	NO	protein_coding
MFF	-0.472404	5.42971	12.5787	0.00039016	0.00259544	2.58579	NO	protein_coding
CACYBP	0.529844	4.96552	12.572	0.00039157	0.0026037	2.58441	NO	protein_coding
NEIL3	1.76987	1.83597	12.5664	0.000392734	0.00261031	2.58331	UP	protein_coding
PPA2	-0.39057	4.29479	12.5635	0.000393351	0.00261328	2.58281	NO	protein_coding
MOK	0.929686	5.55328	12.5575	0.00039461	0.00262051	2.58161	NO	protein_coding
BBS1	-0.549298	3.90335	12.5535	0.000395462	0.00262504	2.58086	NO	protein_coding
CHAF1B	0.969586	2.53928	12.5504	0.000396119	0.00262826	2.58033	NO	protein_coding
WDR19	-0.514169	4.80445	12.5492	0.000396373	0.00262881	2.58024	NO	protein_coding
ESS2	0.461772	3.68928	12.5458	0.000397106	0.00263254	2.57962	NO	protein_coding
RHOG	0.447829	4.91281	12.5448	0.000397301	0.0026327	2.5796	NO	protein_coding
TBC1D16	-0.362325	6.24141	12.5351	0.000399369	0.00264526	2.57753	NO	protein_coding
ZMYM5	-0.33712	3.87595	12.5284	0.000400816	0.00265224	2.57639	NO	protein_coding
TSNAX	-0.296248	5.37375	12.5271	0.000401088	0.00265224	2.57639	NO	protein_coding
SEC22B	-0.335411	7.73174	12.5267	0.000401188	0.00265224	2.57639	NO	protein_coding
ARPP19	-0.306243	7.27048	12.5262	0.000401285	0.00265224	2.57639	NO	protein_coding
UBE2D3	-0.288833	7.86169	12.5239	0.000401781	0.00265438	2.57604	NO	protein_coding
TENT5B	1.04954	2.41902	12.5189	0.000402846	0.00265976	2.57516	UP	protein_coding
PLXNB1	-0.543248	5.87656	12.5185	0.000402941	0.00265976	2.57516	NO	protein_coding
ARHGAP28	-2.38866	4.20609	12.5124	0.000404255	0.00266728	2.57393	DOWN	protein_coding
RAD54B	1.21987	2.42813	12.5094	0.000404913	0.00267048	2.57341	UP	protein_coding
DDB2	-0.546687	4.56466	12.4819	0.000410916	0.00270891	2.56721	NO	protein_coding
CDC42SE2	-0.363607	4.96067	12.4806	0.000411196	0.00270895	2.5672	NO	protein_coding
RAP1GAP2	0.577191	4.13087	12.4803	0.000411274	0.00270895	2.5672	NO	protein_coding
NUFIP2	-0.307925	7.81462	12.4788	0.000411589	0.00270987	2.56705	NO	protein_coding
SYTL5	-1.61536	0.526563	12.471	0.000413318	0.00272008	2.56542	DOWN	protein_coding
TCIM	-1.6902	-0.204549	12.4616	0.000415394	0.00273258	2.56343	DOWN	protein_coding
PTPRK	-0.367461	7.71279	12.4607	0.00041561	0.00273283	2.56339	NO	protein_coding
EIF2AK2	-0.360245	7.26498	12.4593	0.000415917	0.00273367	2.56325	NO	protein_coding
ARID5B	-0.677579	9.25186	12.458	0.000416214	0.00273446	2.56313	NO	protein_coding
COMMD1	0.387711	3.54813	12.4564	0.000416567	0.00273561	2.56295	NO	protein_coding
CXCL16	-1.43289	0.276655	12.4554	0.000416796	0.00273594	2.56289	DOWN	protein_coding
NCOR2	0.512933	8.38104	12.4509	0.000417793	0.00274132	2.56204	NO	protein_coding
LUZP1	-0.339023	6.86548	12.4494	0.000418132	0.00274237	2.56187	NO	protein_coding
MSC	-0.951472	3.72569	12.4322	0.000422004	0.00276659	2.55806	NO	protein_coding
HROB	1.24942	1.81474	12.4293	0.000422639	0.0027695	2.5576	UP	protein_coding
SHOC2	-0.303551	6.09534	12.4286	0.000422807	0.0027695	2.5576	NO	protein_coding
KCNJ2	-1.23889	4.78594	12.4257	0.000423458	0.00277258	2.55712	DOWN	protein_coding
UBXN2A	-0.386779	4.68943	12.4232	0.000424024	0.0027751	2.55672	NO	protein_coding
UEVLD	-0.320504	4.96329	12.4102	0.000426999	0.0027922	2.55405	NO	protein_coding
RO60	-0.271987	7.28436	12.4056	0.000428043	0.00279784	2.55318	NO	protein_coding
PSMA2	0.326042	5.50734	12.4014	0.000429011	0.00280297	2.55238	NO	protein_coding
DTX3L	-0.415178	5.72579	12.4003	0.000429256	0.00280338	2.55232	NO	protein_coding
CXCL10	-2.371	0.0396533	12.3966	0.000430115	0.0028078	2.55163	DOWN	protein_coding
HGS	0.427788	6.97961	12.3936	0.000430812	0.00281115	2.55112	NO	protein_coding
TMEM248	-0.281895	7.07929	12.3924	0.000431075	0.00281168	2.55103	NO	protein_coding
MAP4K5	-0.281271	6.605	12.391	0.000431408	0.00281266	2.55088	NO	protein_coding
ATP5F1B	0.312571	8.35135	12.3846	0.000432879	0.00281923	2.54987	NO	protein_coding
ADAMTS19	-2.54953	-1.35114	12.3843	0.000432966	0.00281923	2.54987	DOWN	protein_coding
PAK4	0.406285	5.23725	12.3631	0.000437898	0.00285014	2.54513	NO	protein_coding
BTN3A3	-0.759357	4.6202	12.3585	0.000438981	0.00285597	2.54425	NO	protein_coding
POLA2	1.13686	3.67524	12.3561	0.000439545	0.00285685	2.54411	UP	protein_coding
PSME1	-0.461457	5.50991	12.3561	0.000439547	0.00285685	2.54411	NO	protein_coding
ZSWIM9	0.69273	2.87749	12.3556	0.000439672	0.00285685	2.54411	NO	protein_coding
JAK3	-0.774052	3.05379	12.3392	0.000443538	0.00288075	2.54049	NO	protein_coding
SERPINE1	0.839761	11.2419	12.3367	0.000444135	0.00288341	2.54009	NO	protein_coding
GLRX	-0.640791	6.23748	12.3301	0.000445716	0.00289245	2.53873	NO	protein_coding
SSX2IP	-0.566463	4.73658	12.3288	0.000446025	0.00289324	2.53862	NO	protein_coding
UBE2J1	-0.362447	5.95784	12.3121	0.000450033	0.002918	2.53491	NO	protein_coding
FAM53A	0.885152	0.353124	12.3081	0.000451005	0.00292308	2.53416	NO	protein_coding
BCL2L12	0.905124	2.60404	12.3063	0.000451441	0.00292467	2.53392	NO	protein_coding
AP1S2	0.499781	6.12905	12.301	0.000452726	0.00293008	2.53312	NO	protein_coding
MEA1	0.450239	4.66733	12.3005	0.000452848	0.00293008	2.53312	NO	protein_coding
DHX38	0.383207	5.62876	12.2976	0.000453539	0.00293332	2.53264	NO	protein_coding
QKI	-0.346432	7.52539	12.2931	0.00045463	0.00293914	2.53178	NO	protein_coding
SLC49A4	-0.377378	4.44477	12.2869	0.000456139	0.00294765	2.53052	NO	protein_coding
RNMT	-0.35335	5.53767	12.2847	0.000456698	0.00295003	2.53017	NO	protein_coding
UNC119B	-0.342332	5.42018	12.2813	0.000457523	0.00295412	2.52957	NO	protein_coding
SCMH1	-0.266304	4.72864	12.2737	0.000459397	0.00296497	2.52798	NO	protein_coding
MGAT5B	0.881626	1.92612	12.2703	0.000460214	0.002969	2.52739	NO	protein_coding
MYORG	1.11453	2.33742	12.2598	0.000462819	0.00298455	2.52512	UP	protein_coding
AQP1	-1.18005	0.126221	12.2584	0.000463168	0.00298555	2.52498	DOWN	protein_coding
TNXB	-1.27258	1.46023	12.2525	0.000464646	0.00299382	2.52377	DOWN	protein_coding
SYNPO2L	1.36301	2.52382	12.2493	0.000465436	0.00299766	2.52322	UP	protein_coding
MBIP	-0.446332	3.35848	12.2438	0.000466806	0.00300522	2.52212	NO	protein_coding
CENPT	0.517858	5.83922	12.2192	0.000473005	0.00304259	2.51676	NO	protein_coding
FMO2	-4.61632	-0.729485	12.2111	0.00047505	0.00305218	2.51539	DOWN	protein_coding
SPRED1	-0.28371	6.56985	12.211	0.000475092	0.00305218	2.51539	NO	protein_coding
CCDC15	1.19459	1.7687	12.2086	0.000475705	0.00305484	2.51501	UP	protein_coding
TCAF2	0.942803	2.18144	12.2057	0.000476446	0.00305832	2.51452	NO	protein_coding
ADK	0.447524	4.81106	12.2017	0.000477461	0.00306356	2.51377	NO	protein_coding
MRPL38	0.357507	4.55659	12.1991	0.000478138	0.00306662	2.51334	NO	protein_coding
PRMT5	0.346473	5.66622	12.1893	0.00048065	0.00308145	2.51124	NO	protein_coding
KIF17	0.735089	2.66254	12.1855	0.000481612	0.00308633	2.51056	NO	protein_coding
NDUFA9	0.352054	4.80337	12.1735	0.000484727	0.003105	2.50794	NO	protein_coding
NEDD8	0.432392	5.50196	12.1638	0.000487268	0.00311998	2.50585	NO	protein_coding
ATG9A	0.415049	6.28918	12.1587	0.000488592	0.00312661	2.50493	NO	protein_coding
CFH	-0.934061	5.78249	12.1583	0.000488711	0.00312661	2.50493	NO	protein_coding
EXOSC5	0.823617	1.98515	12.1546	0.000489663	0.0031314	2.50426	NO	protein_coding
ZBED6	-0.396945	8.01623	12.1493	0.000491052	0.00313898	2.50321	NO	protein_coding
NGF	1.29744	1.17907	12.1485	0.000491271	0.00313907	2.5032	UP	protein_coding
COPZ1	-0.29262	6.45377	12.1469	0.000491707	0.00314055	2.50299	NO	protein_coding
LEPROTL1	-0.314469	5.22373	12.1437	0.000492537	0.00314455	2.50244	NO	protein_coding
TIMM44	0.442588	4.36591	12.1255	0.000497372	0.00317278	2.49856	NO	protein_coding
TVP23C.CDRT4	-2.37587	1.49533	12.1214	0.000498457	0.00317838	2.49779	DOWN	protein_coding
CARHSP1	-0.525023	5.06155	12.1183	0.000499285	0.00318235	2.49725	NO	protein_coding
DNMT1	0.655319	6.73437	12.112	0.000500971	0.00319177	2.49597	NO	protein_coding
XPO6	-0.308433	7.54318	12.111	0.000501243	0.00319218	2.49591	NO	protein_coding
HINT2	0.630469	2.0204	12.1099	0.000501561	0.00319288	2.49582	NO	protein_coding
OSTF1	0.570606	3.65088	12.1081	0.000502033	0.00319457	2.49559	NO	protein_coding
MBOAT7	0.33467	7.40795	12.1062	0.000502542	0.00319648	2.49533	NO	protein_coding
C20orf203	-3.49803	-1.86959	12.1039	0.000503159	0.00319908	2.49497	DOWN	protein_coding
BEX3	-0.511525	6.3036	12.103	0.0005034	0.0031993	2.49495	NO	protein_coding
ZFAND3	-0.340433	6.67609	12.0994	0.000504376	0.00320417	2.49428	NO	protein_coding
ANKH	-0.490792	4.42293	12.0953	0.000505494	0.00320995	2.4935	NO	protein_coding
MIS18BP1	0.860512	4.23443	12.0882	0.00050743	0.0032191	2.49227	NO	protein_coding
[truncated: 10,892 more rows]

## Sheet: Table S3
Table S3: Differential mRNA expression for fibroblast treated with Met5A 10k EV vs MSTO 10k EV
	logFC	logCPM	LR	PValue	FDR	adj-P	diffexp	gene.type	label
POTEE	5.16667	1.81558	291.338	2.54167e-65	1.44781e-62	61.8393	UP	protein_coding	POTEE
ACTA1	3.7084	0.769528	184.869	4.19098e-42	9.07849e-40	39.042	UP	protein_coding	ACTA1
POTEI	4.80179	0.20576	166.972	3.39308e-38	6.44266e-36	35.1909	UP	protein_coding	POTEI
GLUD2	3.56061	0.468269	163.214	2.24623e-37	4.1623e-35	34.3807	UP	protein_coding	GLUD2
EIF5AL1	2.76703	1.51287	151.881	6.72574e-35	1.07752e-32	31.9676	UP	protein_coding	EIF5AL1
ZC3H11B	3.52649	0.807098	144.269	3.10283e-33	4.86955e-31	30.3125	UP	protein_coding	ZC3H11B
EIF3CL	3.44346	5.96654	122.384	1.90202e-28	2.2854e-26	25.641	UP	protein_coding	EIF3CL
GGH	1.84195	4.26649	118.725	1.20279e-27	1.37029e-25	24.8632	UP	protein_coding	GGH
CLCA2	-3.10065	1.49265	115.478	6.18538e-27	6.56077e-25	24.183	DOWN	protein_coding	CLCA2
PGAM4	3.87018	0.148296	112.779	2.41164e-26	2.5232e-24	23.598	UP	protein_coding
TK1	2.97426	4.56915	112.532	2.73209e-26	2.83916e-24	23.5468	UP	protein_coding
FKBP1C	2.53056	1.71077	110.259	8.60027e-26	8.75974e-24	23.0575	UP	protein_coding
AXL	1.19312	9.51778	107.496	3.46531e-25	3.41644e-23	22.4664	UP	protein_coding
C4B	-3.84881	2.44695	84.58	3.6897e-20	2.97108e-18	17.5271	DOWN	protein_coding	C4B
ACSL4	-0.913798	7.76628	82.3987	1.11226e-19	8.9097e-18	17.0501	NO	protein_coding
MOSPD1	-1.0355	4.92942	82.1252	1.27734e-19	1.0179e-17	16.9923	DOWN	protein_coding	MOSPD1
DRAP1	1.36676	6.73777	77.2156	1.53279e-18	1.12258e-16	15.9498	UP	protein_coding
SMPDL3A	-1.32783	3.95318	74.2274	6.96182e-18	4.9116e-16	15.3088	DOWN	protein_coding	SMPDL3A
MYPN	1.31326	5.43894	73.099	1.23309e-17	8.42886e-16	15.0742	UP	protein_coding
HERC4	0.926604	7.8737	70.6703	4.22202e-17	2.83558e-15	14.5474	NO	protein_coding
TWSG1	-1.54082	8.39831	68.2667	1.42814e-16	9.22891e-15	14.0348	DOWN	protein_coding	TWSG1
TBCEL	-0.678762	4.56129	68.1928	1.48265e-16	9.54105e-15	14.0204	NO	protein_coding
PRR11	2.29035	5.54881	67.0606	2.63293e-16	1.67332e-14	13.7764	UP	protein_coding
CHI3L1	-4.01775	1.04425	66.5054	3.48944e-16	2.19949e-14	13.6577	DOWN	protein_coding	CHI3L1
PTTG1	2.34663	3.85613	65.1324	7.00325e-16	4.36073e-14	13.3604	UP	protein_coding
CENPF	3.37328	6.24288	65.0586	7.27031e-16	4.50876e-14	13.3459	UP	protein_coding
WWTR1	-0.823638	6.70436	63.5493	1.56406e-15	9.54574e-14	13.0202	NO	protein_coding
TMEM98	-0.802027	5.78595	63.5344	1.57589e-15	9.57989e-14	13.0186	NO	protein_coding
SPC24	2.6867	3.33654	63.4841	1.61663e-15	9.78888e-14	13.0093	UP	protein_coding
RARRES1	-3.94325	0.423721	63.2968	1.77789e-15	1.06901e-13	12.971	DOWN	protein_coding	RARRES1
ARL5B	-0.855405	5.76773	62.9926	2.0748e-15	1.24165e-13	12.906	NO	protein_coding
JCAD	-0.823819	8.2482	62.9176	2.15535e-15	1.28485e-13	12.8911	NO	protein_coding
USP46	-0.80585	5.44983	62.1495	3.18346e-15	1.84761e-13	12.7334	NO	protein_coding
MMD	-2.11499	4.53229	61.948	3.52639e-15	2.0162e-13	12.6955	DOWN	protein_coding	MMD
GADD45B	1.31171	4.33232	61.5701	4.27261e-15	2.42482e-13	12.6153	UP	protein_coding
CIT	2.56158	5.27628	61.4634	4.51051e-15	2.55043e-13	12.5934	UP	protein_coding
IL1R1	-1.87574	6.31335	61.1978	5.16183e-15	2.90802e-13	12.5364	DOWN	protein_coding
LMNA	0.920363	9.30687	60.1934	8.59797e-15	4.80861e-13	12.318	NO	protein_coding
ROBO4	1.66163	1.73045	60.11	8.97022e-15	4.99862e-13	12.3011	UP	protein_coding
CD68	1.21603	5.61587	59.3534	1.3175e-14	7.31523e-13	12.1358	UP	protein_coding
TENT5C	-1.31121	5.48371	59.2386	1.39668e-14	7.72696e-13	12.112	DOWN	protein_coding
ACAP2	-0.64023	7.09121	58.0883	2.5061e-14	1.37167e-12	11.8628	NO	protein_coding
FOXE1	2.23604	0.59099	56.9916	4.37671e-14	2.34543e-12	11.6298	UP	protein_coding
RASSF3	-0.949742	6.56053	56.5979	5.34688e-14	2.85539e-12	11.5443	NO	protein_coding
CAVIN3	0.833496	6.53037	56.0557	7.04459e-14	3.73606e-12	11.4276	NO	protein_coding
CDCA3	3.33581	3.19047	55.461	9.53308e-14	4.98703e-12	11.3022	UP	protein_coding
ARHGAP33	1.46395	3.14895	54.9949	1.20845e-13	6.27903e-12	11.2021	UP	protein_coding
UBE2Q2	-0.623154	5.46844	54.9383	1.24374e-13	6.44063e-12	11.1911	NO	protein_coding
DOCK5	0.91345	6.86858	54.8489	1.30159e-13	6.71759e-12	11.1728	NO	protein_coding
RPS27AP5	2.2937	-0.0592752	54.8216	1.31984e-13	6.78903e-12	11.1682	UP	protein_coding
RGPD3	1.81456	0.817234	54.6362	1.45036e-13	7.43549e-12	11.1287	UP	protein_coding
CENPE	2.94631	5.03556	54.506	1.54971e-13	7.91845e-12	11.1014	UP	protein_coding
FST	1.3981	7.52047	54.2757	1.74243e-13	8.87371e-12	11.0519	UP	protein_coding
CENPW	2.49609	1.60915	53.6177	2.43551e-13	1.23218e-11	10.9093	UP	protein_coding
MKI67	3.73175	6.88137	53.1881	3.03093e-13	1.52339e-11	10.8172	UP	protein_coding
IQGAP3	3.45929	5.1332	53.0816	3.19977e-13	1.60036e-11	10.7958	UP	protein_coding
KIF20A	3.1139	4.79302	53.0785	3.20488e-13	1.60036e-11	10.7958	UP	protein_coding
PRC1	3.00718	5.05801	52.9013	3.50732e-13	1.74571e-11	10.758	UP	protein_coding
DRAM1	-1.22053	6.53362	52.7187	3.84916e-13	1.90354e-11	10.7204	DOWN	protein_coding
APOBEC3B	3.03869	2.66784	52.5511	4.19204e-13	2.06646e-11	10.6848	UP	protein_coding
DHRS3	-2.8523	4.19221	52.4067	4.51193e-13	2.21704e-11	10.6542	DOWN	protein_coding
HECW2	1.41004	4.39891	52.394	4.54112e-13	2.22428e-11	10.6528	UP	protein_coding
PIMREG	3.36574	2.63019	52.2791	4.81464e-13	2.35077e-11	10.6288	UP	protein_coding
CCNB2	2.73108	3.49152	52.0623	5.37671e-13	2.61689e-11	10.5822	UP	protein_coding
PIN1	0.774384	5.02674	51.9731	5.62664e-13	2.7299e-11	10.5639	NO	protein_coding
HNRNPA1L3	1.26619	2.20005	51.8142	6.10076e-13	2.95062e-11	10.5301	UP	protein_coding
H2AC16	3.55923	3.37324	51.6308	6.69828e-13	3.22945e-11	10.4909	UP	protein_coding
CENPM	3.20322	1.05426	51.2945	7.94962e-13	3.8188e-11	10.4181	UP	protein_coding
CDC20	3.63943	4.52048	51.2894	7.97032e-13	3.8188e-11	10.4181	UP	protein_coding
KITLG	-0.953691	6.78656	51.1775	8.4381e-13	4.03037e-11	10.3947	NO	protein_coding
TPT1	-0.838544	9.80599	51.0756	8.88751e-13	4.23189e-11	10.3735	NO	protein_coding
MCC	-1.37378	5.75863	50.9982	9.24528e-13	4.38865e-11	10.3577	DOWN	protein_coding
HMGB2	2.10564	4.38369	50.6657	1.09518e-12	5.18275e-11	10.2854	UP	protein_coding
PLAT	-2.33245	7.4806	50.6208	1.12051e-12	5.28631e-11	10.2768	DOWN	protein_coding
TACC3	2.61118	4.85663	50.4964	1.19383e-12	5.59607e-11	10.2521	UP	protein_coding
CAMK1D	-2.17496	3.588	50.3974	1.25562e-12	5.85196e-11	10.2327	DOWN	protein_coding
RHOQ	-0.784871	7.11428	49.8191	1.68593e-12	7.81013e-11	10.1073	NO	protein_coding
PLP2	1.38849	5.7676	49.5643	1.91971e-12	8.8664e-11	10.0523	UP	protein_coding
KLHL5	-1.12132	7.43688	49.5066	1.97702e-12	9.10376e-11	10.0408	DOWN	protein_coding
SHCBP1	3.11637	4.32415	49.4545	2.03024e-12	9.32091e-11	10.0305	UP	protein_coding
PCLAF	2.44828	3.05072	49.3795	2.10938e-12	9.65543e-11	10.0152	UP	protein_coding
FOXM1	2.43471	4.86802	49.1528	2.36783e-12	1.08063e-10	9.96632	UP	protein_coding
NRGN	1.59197	2.58821	48.8547	2.75651e-12	1.25059e-10	9.90288	UP	protein_coding
MMP3	2.39682	3.22312	48.8021	2.83138e-12	1.28078e-10	9.89252	UP	protein_coding
RNASEH2A	1.8527	2.62454	48.7445	2.91582e-12	1.31511e-10	9.88104	UP	protein_coding
NUDT5	-0.669755	5.05833	48.4299	3.42305e-12	1.53937e-10	9.81266	NO	protein_coding
RGS7	2.70164	0.875573	48.2939	3.66895e-12	1.64514e-10	9.7838	UP	protein_coding
SAPCD2	3.28664	2.10982	48.2842	3.68706e-12	1.64846e-10	9.78292	UP	protein_coding
NSG1	-1.93935	2.84355	48.1485	3.95133e-12	1.7564e-10	9.75538	DOWN	protein_coding
RFTN1	-0.909171	6.20369	47.8357	4.6348e-12	2.04837e-10	9.68859	NO	protein_coding
MT.ND2	2.00218	8.75317	47.2988	6.09504e-12	2.68601e-10	9.57089	UP	protein_coding
MARCHF4	1.22974	5.86684	47.1993	6.41238e-12	2.81778e-10	9.55009	UP	protein_coding
H3C3	3.32844	3.99635	47.1488	6.57974e-12	2.88309e-10	9.54014	UP	protein_coding
BUB1	3.07268	4.54236	47.0577	6.89289e-12	3.01172e-10	9.52119	UP	protein_coding
MT2A	2.17275	8.15505	47.0083	7.06862e-12	3.07976e-10	9.51148	UP	protein_coding
GADD45GIP1	1.05691	4.02518	46.7136	8.2158e-12	3.54941e-10	9.44984	UP	protein_coding
UTRN	0.65878	7.7012	46.4411	9.44118e-12	4.06738e-10	9.39069	NO	protein_coding
KIFC1	3.31654	3.86109	46.303	1.01308e-11	4.35227e-10	9.36128	UP	protein_coding
FHIP1A	1.93469	0.314957	46.2105	1.06204e-11	4.5499e-10	9.342	UP	protein_coding
CEP55	3.17914	4.10816	45.9211	1.23113e-11	5.24509e-10	9.28025	UP	protein_coding
ZDHHC12	0.853852	3.51521	45.8689	1.26437e-11	5.37183e-10	9.26988	NO	protein_coding
RPL21	-0.643587	7.79961	45.7079	1.3727e-11	5.81601e-10	9.23537	NO	protein_coding
CCNB1	2.46672	4.96757	45.3613	1.63838e-11	6.90364e-10	9.16092	UP	protein_coding
STX6	-0.581434	5.81922	45.3446	1.65239e-11	6.94366e-10	9.15841	NO	protein_coding
NBL1	-1.09308	5.38221	45.1464	1.8284e-11	7.66236e-10	9.11564	DOWN	protein_coding
H3C2	3.41095	4.59502	45.1399	1.83447e-11	7.66691e-10	9.11538	UP	protein_coding
ANLN	2.75844	7.09556	44.9593	2.01168e-11	8.38473e-10	9.07651	UP	protein_coding
KIF26B	-2.29717	3.51567	44.9435	2.02802e-11	8.42998e-10	9.07417	DOWN	protein_coding
SESN3	-1.37132	5.288	44.8309	2.14806e-11	8.90488e-10	9.05037	DOWN	protein_coding
LNX1	-3.11764	-0.237998	44.6711	2.33069e-11	9.58449e-10	9.01843	DOWN	protein_coding
BAG2	-0.779356	6.10889	44.4877	2.55964e-11	1.04146e-09	8.98236	NO	protein_coding
CENPH	2.07118	1.83864	44.4671	2.58673e-11	1.04971e-09	8.97893	UP	protein_coding
C4A	-1.77055	3.08888	44.1629	3.0216e-11	1.22295e-09	8.91259	DOWN	protein_coding
CCNA2	2.69512	4.50722	44.1444	3.05028e-11	1.23132e-09	8.90963	UP	protein_coding
PRR12	0.770982	6.3861	43.8967	3.46166e-11	1.39009e-09	8.85696	NO	protein_coding
ZFAND5	-1.1747	7.84874	43.7715	3.69045e-11	1.4781e-09	8.8303	DOWN	protein_coding
MFSD2B	3.19286	-0.790973	43.7135	3.80146e-11	1.51861e-09	8.81855	UP	protein_coding
CROT	-1.06247	4.87666	43.6249	3.97748e-11	1.58481e-09	8.80002	DOWN	protein_coding
RPL26	-0.594218	7.938	43.4827	4.27735e-11	1.69989e-09	8.76958	NO	protein_coding
ATP6V1A	-0.651592	7.28424	43.3988	4.46469e-11	1.76977e-09	8.75208	NO	protein_coding
SMC2	1.25207	5.15375	43.0223	5.41193e-11	2.13973e-09	8.66964	UP	protein_coding
PALLD	-0.726357	9.44937	42.8403	5.93971e-11	2.34238e-09	8.63034	NO	protein_coding
H1.5	3.42557	5.45182	42.7135	6.33743e-11	2.49283e-09	8.60331	UP	protein_coding
BMF	-1.80685	3.33783	42.5312	6.95648e-11	2.72935e-09	8.56394	DOWN	protein_coding
MCM5	2.00386	4.75748	42.5042	7.05318e-11	2.76025e-09	8.55905	UP	protein_coding
TPX2	2.38266	5.77335	42.2587	7.99646e-11	3.11356e-09	8.50674	UP	protein_coding
IL33	-4.31299	-0.311982	42.0857	8.73603e-11	3.38439e-09	8.47052	DOWN	protein_coding
FXYD5	1.21135	6.32484	41.9488	9.36932e-11	3.62061e-09	8.44122	UP	protein_coding
PLK1	2.83188	4.52878	41.9279	9.47037e-11	3.65048e-09	8.43765	UP	protein_coding
TSPAN6	-1.01234	4.31278	41.9203	9.50699e-11	3.65544e-09	8.43706	DOWN	protein_coding
FIBIN	-1.37869	5.09853	41.8824	9.69289e-11	3.70959e-09	8.43067	DOWN	protein_coding
ARRB1	-1.74697	4.90473	41.8818	9.69606e-11	3.70959e-09	8.43067	DOWN	protein_coding
SPAG5	2.77174	4.47729	41.8521	9.84469e-11	3.7571e-09	8.42515	UP	protein_coding
YPEL5	-0.639758	5.87966	41.8235	9.98932e-11	3.80287e-09	8.41989	NO	protein_coding
LPXN	1.41827	4.85885	41.7816	1.0206e-10	3.87576e-09	8.41164	UP	protein_coding
STK38L	-0.938124	4.07308	41.7432	1.04086e-10	3.94218e-09	8.40426	NO	protein_coding
WDR62	3.01655	3.42973	41.7387	1.04322e-10	3.94218e-09	8.40426	UP	protein_coding
ADORA1	-1.90709	0.797253	41.5892	1.12615e-10	4.24514e-09	8.37211	DOWN	protein_coding
CIBAR1	-0.928099	4.55609	41.5768	1.13332e-10	4.26172e-09	8.37041	NO	protein_coding
CEP250	0.996507	5.64601	41.3426	1.27753e-10	4.79229e-09	8.31946	NO	protein_coding
IRAG1	-1.03369	6.1001	41.1933	1.37891e-10	5.16001e-09	8.28735	DOWN	protein_coding
TUBB4B	1.00314	7.77697	41.0687	1.46974e-10	5.48656e-09	8.2607	UP	protein_coding
BIRC5	2.95047	4.4138	40.9931	1.52769e-10	5.68908e-09	8.24496	UP	protein_coding
PCSK5	-1.09707	2.75293	40.9005	1.60178e-10	5.95056e-09	8.22544	DOWN	protein_coding
SLC40A1	-2.04944	3.85523	40.8414	1.65098e-10	6.11857e-09	8.21335	DOWN	protein_coding
DKK1	1.78762	5.04444	40.8036	1.68325e-10	6.22107e-09	8.20613	UP	protein_coding
TMEM64	-0.743162	4.7516	40.7973	1.6887e-10	6.22107e-09	8.20613	NO	protein_coding
ITGA1	-1.0539	7.79238	40.7949	1.69077e-10	6.22107e-09	8.20613	DOWN	protein_coding
NUSAP1	2.87042	4.17649	40.342	2.13179e-10	7.82504e-09	8.10651	UP	protein_coding
CREB3L2	0.78523	8.08202	40.3275	2.14768e-10	7.8646e-09	8.10432	NO	protein_coding
RPS6KA4	0.969862	5.44768	40.1992	2.2934e-10	8.35842e-09	8.07788	NO	protein_coding
TOP2A	2.78825	6.58292	40.1698	2.32824e-10	8.46532e-09	8.07236	UP	protein_coding
TGFB3	-1.68498	2.11131	40.1102	2.40032e-10	8.70682e-09	8.06014	DOWN	protein_coding
RAB27A	-0.578928	4.27627	39.985	2.55921e-10	9.26133e-09	8.03333	NO	protein_coding
TECR	0.676936	5.50453	39.7817	2.83993e-10	1.02531e-08	7.98915	NO	protein_coding
ARL1	-0.574383	6.73747	39.7338	2.91041e-10	1.04584e-08	7.98053	NO	protein_coding
RECK	-0.963616	7.14433	39.6832	2.9869e-10	1.06834e-08	7.97129	NO	protein_coding
APOE	-2.129	2.17522	39.6662	3.01293e-10	1.07515e-08	7.96853	DOWN	protein_coding
H3C13	3.34146	2.22064	39.6503	3.03762e-10	1.08145e-08	7.96599	UP	protein_coding
FANCD2	2.68885	3.48137	39.5713	3.1629e-10	1.12345e-08	7.94945	UP	protein_coding
UBE2S	1.62165	5.63981	39.5238	3.2409e-10	1.1485e-08	7.93987	UP	protein_coding
CEP152	1.59192	3.24874	39.1626	3.8994e-10	1.37238e-08	7.86253	UP	protein_coding
KNL1	3.09005	5.10994	39.0315	4.17027e-10	1.46436e-08	7.83435	UP	protein_coding
TMEM263	-0.599952	7.55755	39.0001	4.23789e-10	1.48471e-08	7.82836	NO	protein_coding
N4BP2	-0.935278	3.87971	38.9069	4.44496e-10	1.55371e-08	7.80863	NO	protein_coding
FGD6	-0.819601	4.71665	38.8743	4.51999e-10	1.57636e-08	7.80235	NO	protein_coding
H2AC13	2.8265	3.89655	38.7687	4.77123e-10	1.66022e-08	7.77984	UP	protein_coding
MAGED4	-1.02231	6.07612	38.6502	5.06987e-10	1.76015e-08	7.75445	DOWN	protein_coding
BACH1	-0.749219	7.00205	38.6386	5.10002e-10	1.76663e-08	7.75286	NO	protein_coding
ASPM	3.11113	6.05766	38.5466	5.3461e-10	1.84771e-08	7.73337	UP	protein_coding
POC1A	1.99823	2.48556	38.5101	5.44712e-10	1.8784e-08	7.72621	UP	protein_coding
TMEM167A	-0.627361	6.78295	38.5035	5.46564e-10	1.88057e-08	7.72571	NO	protein_coding
MYL6	0.810838	8.30733	38.3297	5.97458e-10	2.04653e-08	7.68898	NO	protein_coding
ZMAT3	-0.747369	8.22927	38.3097	6.03633e-10	2.06309e-08	7.68548	NO	protein_coding
ZNF90	1.92003	0.939599	38.1986	6.38996e-10	2.1791e-08	7.66172	UP	protein_coding
CDKN3	2.37102	2.12984	38.1413	6.58041e-10	2.23909e-08	7.64993	UP	protein_coding
OSR1	0.804851	5.68072	38.0866	6.7675e-10	2.29766e-08	7.63871	NO	protein_coding
DCAF10	-0.570433	5.81962	38.0727	6.81554e-10	2.30888e-08	7.6366	NO	protein_coding
PDE5A	-1.27534	9.76584	37.9246	7.35314e-10	2.48007e-08	7.60554	DOWN	protein_coding
PRNP	-0.677558	8.14934	37.8867	7.4975e-10	2.52323e-08	7.59804	NO	protein_coding
GTSE1	3.26144	3.54959	37.8458	7.65623e-10	2.57102e-08	7.58989	UP	protein_coding
CCNG1	-0.773118	7.57921	37.6347	8.53135e-10	2.85865e-08	7.54384	NO	protein_coding
EIF2S3B	1.41055	0.687358	37.5887	8.73509e-10	2.92056e-08	7.53453	UP	protein_coding
ENTREP3	0.53702	5.75345	37.5829	8.76103e-10	2.92288e-08	7.53419	NO	protein_coding
H2AC7	2.13552	3.71244	37.5495	8.91235e-10	2.96692e-08	7.52769	UP	protein_coding
H2AC14	3.16666	3.61519	37.5321	8.99228e-10	2.98707e-08	7.52475	UP	protein_coding
AURKAIP1	0.759547	4.94997	37.5142	9.07495e-10	3.00803e-08	7.52172	NO	protein_coding
MT.ND5	2.34829	9.19442	37.4935	9.17194e-10	3.03364e-08	7.51804	UP	protein_coding
NCEH1	1.61912	6.24335	37.3448	9.89826e-10	3.26685e-08	7.48587	UP	protein_coding
TROAP	3.26753	3.09698	37.3403	9.9213e-10	3.26744e-08	7.48579	UP	protein_coding
EXTL2	-0.633852	5.25847	37.2647	1.03134e-09	3.38933e-08	7.46989	NO	protein_coding
KIF4A	2.96372	4.01247	37.2323	1.0486e-09	3.43182e-08	7.46447	UP	protein_coding
RACGAP1	1.97553	4.74962	37.2171	1.05681e-09	3.45091e-08	7.46207	UP	protein_coding
EIF3E	-0.639148	7.62849	37.195	1.06887e-09	3.47943e-08	7.45849	NO	protein_coding
RRM2	2.89519	5.6351	37.1928	1.07007e-09	3.47943e-08	7.45849	UP	protein_coding
ARL15	-0.756358	3.88849	37.1622	1.08702e-09	3.52709e-08	7.45258	NO	protein_coding
MRPL28	0.658012	4.67567	37.1498	1.09391e-09	3.54198e-08	7.45075	NO	protein_coding
HMGA1	0.831889	9.64418	37.0674	1.14113e-09	3.68711e-08	7.43331	NO	protein_coding
H2BC18	2.33041	4.30692	37.0299	1.16334e-09	3.73532e-08	7.42767	UP	protein_coding
PLCB4	1.74951	7.50209	37.0071	1.17701e-09	3.77134e-08	7.4235	UP	protein_coding
EIF3H	-0.484027	6.89874	36.8635	1.26693e-09	4.05102e-08	7.39244	NO	protein_coding
NRM	1.02509	3.27698	36.8412	1.28153e-09	4.0892e-08	7.38836	UP	protein_coding
HNRNPA1L2	10.5598	0.920841	36.7436	1.34735e-09	4.2903e-08	7.36751	UP	protein_coding
MND1	8.04779	-0.558531	36.7321	1.35529e-09	4.30668e-08	7.36586	UP	protein_coding
CKS1B	1.93302	3.28815	36.6056	1.44616e-09	4.58598e-08	7.33857	UP	protein_coding
ZBTB33	-0.690302	4.8978	36.5639	1.47745e-09	4.66805e-08	7.33086	NO	protein_coding
RDH10	-1.40314	6.41653	36.563	1.47811e-09	4.66805e-08	7.33086	DOWN	protein_coding
YTHDF3	-0.368476	6.97293	36.541	1.49487e-09	4.71129e-08	7.32686	NO	protein_coding
CYBRD1	-0.904782	7.842	36.3982	1.60848e-09	5.05897e-08	7.29594	NO	protein_coding
MT.ATP6	1.99911	8.65823	36.3446	1.65333e-09	5.18943e-08	7.28488	UP	protein_coding
QSOX1	-1.1768	10.7728	36.2408	1.74382e-09	5.45122e-08	7.26351	DOWN	protein_coding
MYO9A	0.534126	6.26825	36.2321	1.75157e-09	5.46433e-08	7.26246	NO	protein_coding
CCN4	-2.92639	3.9725	36.1851	1.79434e-09	5.58643e-08	7.25287	DOWN	protein_coding
DTD1	0.79838	4.13421	36.1648	1.81315e-09	5.62548e-08	7.24984	NO	protein_coding
TBC1D2B	-0.602109	6.5422	36.1637	1.8142e-09	5.62548e-08	7.24984	NO	protein_coding
RAVER1	0.663125	5.90922	36.1068	1.8679e-09	5.78036e-08	7.23805	NO	protein_coding
AURKB	3.16834	2.9868	36.0717	1.9019e-09	5.86334e-08	7.23185	UP	protein_coding
UBE2T	2.1094	1.88588	36.0712	1.90235e-09	5.86334e-08	7.23185	UP	protein_coding
H2AX	1.71696	5.33883	36.0571	1.91624e-09	5.89435e-08	7.22956	UP	protein_coding
CYGB	-1.83756	3.28687	35.9782	1.99541e-09	6.12563e-08	7.21285	DOWN	protein_coding
AZI2	-0.770264	5.40054	35.8926	2.08502e-09	6.38797e-08	7.19464	NO	protein_coding
GCLC	-0.739423	5.53668	35.7891	2.19879e-09	6.72313e-08	7.17243	NO	protein_coding
RPS7	-0.520824	7.98117	35.7826	2.20614e-09	6.73223e-08	7.17184	NO	protein_coding
KLC1	0.580652	7.19216	35.7418	2.25277e-09	6.8609e-08	7.16362	NO	protein_coding
CENPU	2.12333	2.65223	35.7099	2.29001e-09	6.94682e-08	7.15821	UP	protein_coding
DUT	0.77638	4.49501	35.6882	2.31567e-09	7.01082e-08	7.15423	NO	protein_coding
POLQ	2.77803	3.36891	35.6172	2.40153e-09	7.25648e-08	7.13927	UP	protein_coding
TBC1D20	-0.445639	6.20916	35.6051	2.41651e-09	7.28742e-08	7.13743	NO	protein_coding
EFR3A	-0.545137	7.20197	35.4877	2.56673e-09	7.7253e-08	7.11208	NO	protein_coding
KIF23	2.07935	4.96698	35.4825	2.57351e-09	7.73058e-08	7.11179	UP	protein_coding
LXN	-1.28973	3.994	35.4722	2.58718e-09	7.75649e-08	7.11033	DOWN	protein_coding
DEPDC1	2.69896	4.12361	35.3575	2.74404e-09	8.20392e-08	7.08598	UP	protein_coding
H3C12	3.17737	2.86164	35.3554	2.74708e-09	8.20392e-08	7.08598	UP	protein_coding
IL17RE	1.59825	2.204	35.3306	2.78231e-09	8.29302e-08	7.08129	UP	protein_coding
NEGR1	1.11796	5.02096	35.2833	2.85063e-09	8.44935e-08	7.07318	UP	protein_coding
SKIL	-0.884003	6.52509	35.2829	2.85124e-09	8.44935e-08	7.07318	NO	protein_coding
DIAPH3	1.45312	5.33619	35.2047	2.96803e-09	8.7507e-08	7.05796	UP	protein_coding
ZWINT	2.40722	3.29871	35.1696	3.022e-09	8.88687e-08	7.05125	UP	protein_coding
PKMYT1	3.26345	2.90601	35.1417	3.06558e-09	8.98068e-08	7.04669	UP	protein_coding
TNFRSF21	-1.40869	5.41231	35.1313	3.08207e-09	9.01184e-08	7.04519	DOWN	protein_coding
C12orf75	0.720144	7.04919	35.0785	3.16682e-09	9.24206e-08	7.03423	NO	protein_coding
KLF2	1.88026	3.85905	35.0658	3.18748e-09	9.26719e-08	7.03305	UP	protein_coding
H2AC15	2.06954	2.39846	35.0522	3.20987e-09	9.30845e-08	7.03112	UP	protein_coding
PBK	2.82811	3.31879	35.0498	3.21378e-09	9.30845e-08	7.03112	UP	protein_coding
GAB1	-1.20907	4.60956	34.9971	3.30205e-09	9.54615e-08	7.02017	DOWN	protein_coding
NDUFB9	0.535876	4.50472	34.9746	3.34034e-09	9.62071e-08	7.01679	NO	protein_coding
PYGO1	-0.646284	5.00098	34.9746	3.34035e-09	9.62071e-08	7.01679	NO	protein_coding
KIF20B	1.99876	4.70351	34.9678	3.35196e-09	9.6361e-08	7.0161	UP	protein_coding
UBE2C	3.12568	3.20295	34.8817	3.50355e-09	1.00531e-07	6.9977	UP	protein_coding
REX1BD	0.779116	4.04001	34.8669	3.5304e-09	1.01113e-07	6.99519	NO	protein_coding
ZNF436	-0.750992	4.29486	34.8449	3.57049e-09	1.02071e-07	6.9911	NO	protein_coding
RAB8B	-0.871232	5.98447	34.788	3.67628e-09	1.049e-07	6.97922	NO	protein_coding
TEDC1	2.23276	1.61842	34.771	3.70848e-09	1.05623e-07	6.97624	UP	protein_coding
PLEKHA1	-0.525247	4.58861	34.758	3.73341e-09	1.06137e-07	6.97413	NO	protein_coding
PHLDA2	0.990305	4.98626	34.7515	3.74595e-09	1.06297e-07	6.97348	NO	protein_coding
METTL8	-0.531483	4.81679	34.6644	3.91735e-09	1.10956e-07	6.95485	NO	protein_coding
TTK	2.88659	3.57107	34.599	4.05107e-09	1.14532e-07	6.94107	UP	protein_coding
KLHL24	-1.58131	5.25284	34.5888	4.07234e-09	1.14922e-07	6.9396	DOWN	protein_coding
H2AC11	2.56602	4.45486	34.5693	4.11353e-09	1.15872e-07	6.93602	UP	protein_coding
AK3	-0.927028	5.97862	34.5502	4.15409e-09	1.16801e-07	6.93256	NO	protein_coding
TIMELESS	1.55032	4.20291	34.536	4.18432e-09	1.17436e-07	6.9302	UP	protein_coding
TMEM217	-1.20934	1.4644	34.4224	4.43599e-09	1.24272e-07	6.90563	DOWN	protein_coding
MED15	0.651564	6.81648	34.417	4.44816e-09	1.24387e-07	6.90523	NO	protein_coding
LYPD6	1.27563	1.17099	34.4068	4.47156e-09	1.24814e-07	6.90374	UP	protein_coding
HMMR	2.92439	3.70408	34.3349	4.63985e-09	1.29277e-07	6.88848	UP	protein_coding
RAB9A	-0.727339	3.62688	34.2947	4.73676e-09	1.31738e-07	6.88029	NO	protein_coding
YAP1	-0.424976	8.11457	34.2666	4.80562e-09	1.33412e-07	6.8748	NO	protein_coding
MXRA8	0.802372	8.771	34.1802	5.02368e-09	1.39215e-07	6.85632	NO	protein_coding
CEP290	0.577971	5.14808	34.0658	5.32808e-09	1.47385e-07	6.83155	NO	protein_coding
CENPA	2.81941	1.86582	34.0409	5.39665e-09	1.49013e-07	6.82677	UP	protein_coding
BICRA	0.861657	4.6631	34.0081	5.48826e-09	1.51272e-07	6.82024	NO	protein_coding
SMAD5	-0.488924	6.75827	33.9654	5.61018e-09	1.54355e-07	6.81148	NO	protein_coding
YIF1B	0.799401	4.89273	33.9211	5.73931e-09	1.57345e-07	6.80315	NO	protein_coding
H3C7	2.80291	3.60572	33.9164	5.75322e-09	1.57446e-07	6.80287	UP	protein_coding
LRRC15	1.64766	6.76318	33.8854	5.84559e-09	1.59689e-07	6.79672	UP	protein_coding
CDCA8	2.81445	3.55498	33.8066	6.08709e-09	1.65659e-07	6.78079	UP	protein_coding
NEK2	3.56733	2.48913	33.806	6.08911e-09	1.65659e-07	6.78079	UP	protein_coding
C1orf198	-1.02185	7.18959	33.8037	6.09641e-09	1.65659e-07	6.78079	DOWN	protein_coding
WARS1	-1.34816	7.50718	33.6893	6.46544e-09	1.75376e-07	6.75603	DOWN	protein_coding
MEX3C	-0.540357	5.81137	33.6823	6.48895e-09	1.75571e-07	6.75555	NO	protein_coding
KIF2C	3.1414	3.91769	33.6803	6.49544e-09	1.75571e-07	6.75555	UP	protein_coding
ZEB1	-0.767367	7.92536	33.6106	6.73237e-09	1.81656e-07	6.74075	NO	protein_coding
EIF3L	-0.528846	7.33008	33.5798	6.84001e-09	1.84237e-07	6.73462	NO	protein_coding
ENSG00000284946	2.44256	2.50902	33.5296	7.01877e-09	1.88721e-07	6.72418	UP	protein_coding
PDE4C	-2.83131	1.18205	33.5011	7.12254e-09	1.91177e-07	6.71856	DOWN	protein_coding
EPAS1	-1.60834	9.21948	33.474	7.22224e-09	1.93516e-07	6.71328	DOWN	protein_coding
ATP6V0C	0.77395	7.22983	33.4212	7.42114e-09	1.98499e-07	6.70224	NO	protein_coding
CKAP2L	2.94548	3.84198	33.3973	7.51299e-09	2.00607e-07	6.69765	UP	protein_coding
ITGA6	1.97365	7.94639	33.3754	7.59781e-09	2.02339e-07	6.69392	UP	protein_coding
TMSB4X	-0.75642	9.1784	33.3738	7.60415e-09	2.02339e-07	6.69392	NO	protein_coding
TRIP13	2.23768	3.49732	33.3469	7.71011e-09	2.04804e-07	6.68866	UP	protein_coding
RIN2	-0.57847	6.40835	33.3268	7.79033e-09	2.06578e-07	6.68492	NO	protein_coding
AHCYL1	-0.526813	6.6311	33.2325	8.17711e-09	2.16461e-07	6.66462	NO	protein_coding
PDPN	-2.61762	2.2896	33.1391	8.5795e-09	2.26361e-07	6.6452	DOWN	protein_coding
DLGAP5	2.90087	4.17248	33.1389	8.58051e-09	2.26361e-07	6.6452	UP	protein_coding
H2BC15	1.93072	3.17745	33.115	8.6865e-09	2.28764e-07	6.64061	UP	protein_coding
RAB23	-0.835831	5.71359	33.1096	8.71096e-09	2.29016e-07	6.64013	NO	protein_coding
PRKCE	-0.781385	4.22884	33.0822	8.83451e-09	2.31648e-07	6.63517	NO	protein_coding
PARD6B	-1.63011	1.17431	33.0807	8.84119e-09	2.31648e-07	6.63517	DOWN	protein_coding
H3.3A	-0.599281	6.28741	33.0677	8.90061e-09	2.32808e-07	6.633	NO	protein_coding
AGT	-3.40409	-0.339898	33.0286	9.08144e-09	2.37135e-07	6.625	DOWN	protein_coding
SMAD3	-0.862642	8.07653	33.0011	9.21068e-09	2.40102e-07	6.6196	NO	protein_coding
ZNF561	-0.450889	5.23896	32.9858	9.28323e-09	2.41584e-07	6.61693	NO	protein_coding
ZBTB44	-0.875945	5.55651	32.9675	9.37122e-09	2.43462e-07	6.61357	NO	protein_coding
RGPD2	3.56292	-0.16234	32.954	9.43655e-09	2.44746e-07	6.61129	UP	protein_coding
HNMT	-1.58564	3.03486	32.9329	9.53972e-09	2.47005e-07	6.60729	DOWN	protein_coding
CHI3L2	-3.07217	1.197	32.9157	9.62415e-09	2.48772e-07	6.6042	DOWN	protein_coding
STMN1	0.924796	6.77263	32.8493	9.95894e-09	2.56994e-07	6.59008	NO	protein_coding
ZNF12	-0.460181	5.12876	32.8347	1.00336e-08	2.58488e-07	6.58756	NO	protein_coding
RPS3A	-0.669479	8.5824	32.8052	1.01872e-08	2.62006e-07	6.58169	NO	protein_coding
H3C8	3.09099	3.95322	32.7482	1.04906e-08	2.68908e-07	6.5704	UP	protein_coding
KIF18B	3.17089	3.93042	32.6531	1.10162e-08	2.81912e-07	6.54989	UP	protein_coding
GXYLT2	-1.78281	4.6899	32.626	1.1171e-08	2.85397e-07	6.54455	DOWN	protein_coding
RPS6KA3	-0.487626	6.45274	32.6169	1.12233e-08	2.8626e-07	6.54324	NO	protein_coding
CCDC124	0.800295	4.30187	32.5576	1.15713e-08	2.94646e-07	6.5307	NO	protein_coding
INO80E	0.51388	5.18831	32.511	1.1852e-08	3.01296e-07	6.52101	NO	protein_coding
RAB13	-0.567409	6.79128	32.506	1.18824e-08	3.01569e-07	6.52061	NO	protein_coding
CLPTM1	0.659822	7.19927	32.4774	1.20588e-08	3.05543e-07	6.51493	NO	protein_coding
TLK1	-0.588161	6.45994	32.4406	1.22894e-08	3.10872e-07	6.50742	NO	protein_coding
KIAA1549L	1.59623	5.19527	32.4186	1.2429e-08	3.13889e-07	6.50322	UP	protein_coding
PCNT	0.90693	5.6743	32.3712	1.27363e-08	3.20808e-07	6.49375	NO	protein_coding
CDK1	3.06349	3.82965	32.3699	1.27447e-08	3.20808e-07	6.49375	UP	protein_coding
HIRIP3	1.30707	1.35915	32.3564	1.28333e-08	3.22511e-07	6.49146	UP	protein_coding
NID2	-0.911122	9.17383	32.3374	1.29593e-08	3.25145e-07	6.48792	NO	protein_coding
SEPTIN2	-0.454956	8.99275	32.3335	1.29853e-08	3.25267e-07	6.48776	NO	protein_coding
HNRNPM	0.786476	6.30784	32.3086	1.31533e-08	3.28939e-07	6.48288	NO	protein_coding
SMIM13	-0.636808	5.12776	32.2922	1.32642e-08	3.31174e-07	6.47994	NO	protein_coding
GDE1	-0.565001	6.22329	32.2182	1.37792e-08	3.43476e-07	6.4641	NO	protein_coding
GOSR2	-0.408498	6.39976	32.0445	1.50682e-08	3.74392e-07	6.42667	NO	protein_coding
FBXO30	-0.493377	5.82699	31.9695	1.56613e-08	3.88501e-07	6.41061	NO	protein_coding
SPC25	3.08975	1.38727	31.9087	1.61588e-08	4.00197e-07	6.39773	UP	protein_coding
HJURP	2.83813	4.02273	31.8981	1.62474e-08	4.01745e-07	6.39605	UP	protein_coding
MYLIP	-1.00449	2.47523	31.8728	1.64603e-08	4.06107e-07	6.39136	DOWN	protein_coding
FAM210B	-0.969445	6.37736	31.8692	1.64908e-08	4.06107e-07	6.39136	NO	protein_coding
RUVBL2	0.665342	5.64247	31.8678	1.65031e-08	4.06107e-07	6.39136	NO	protein_coding
H4C13	2.67534	2.54778	31.8595	1.65734e-08	4.07188e-07	6.39021	UP	protein_coding
ESYT1	0.560166	7.85062	31.8287	1.68385e-08	4.12252e-07	6.38484	NO	protein_coding
NTN1	-2.0086	0.844131	31.8262	1.686e-08	4.12252e-07	6.38484	DOWN	protein_coding
DHFR	1.35337	4.9499	31.7998	1.7091e-08	4.17238e-07	6.37962	UP	protein_coding
MTFR1L	-0.383434	5.25516	31.7237	1.77741e-08	4.33227e-07	6.36328	NO	protein_coding
RMND5A	-0.701486	4.45943	31.7198	1.78093e-08	4.33398e-07	6.36311	NO	protein_coding
F2RL2	-1.06959	7.79528	31.716	1.78442e-08	4.3356e-07	6.36295	DOWN	protein_coding
CTSF	-1.07302	3.55253	31.6832	1.81482e-08	4.40251e-07	6.3563	DOWN	protein_coding
CENPK	2.17048	2.05563	31.6563	1.84016e-08	4.44994e-07	6.35165	UP	protein_coding
CDC25C	3.01771	1.37414	31.5794	1.91445e-08	4.62234e-07	6.33514	UP	protein_coding
UBE2D1	-0.76472	3.94017	31.4729	2.02242e-08	4.86215e-07	6.31317	NO	protein_coding
H4C9	2.68988	2.16671	31.4721	2.02326e-08	4.86215e-07	6.31317	UP	protein_coding
FANCI	1.74169	4.46968	31.4533	2.04294e-08	4.90179e-07	6.30965	UP	protein_coding
KIF15	2.57466	2.82893	31.2566	2.26074e-08	5.41591e-07	6.26633	UP	protein_coding
CENPX	0.827139	3.30765	31.2304	2.2915e-08	5.48107e-07	6.26113	NO	protein_coding
C1S	-1.76243	8.07267	31.2273	2.29513e-08	5.48122e-07	6.26112	DOWN	protein_coding
ZBTB1	-0.508979	5.41545	31.1428	2.3973e-08	5.7075e-07	6.24355	NO	protein_coding
TSPAN11	-2.16587	1.58025	31.1287	2.41469e-08	5.73126e-07	6.24175	DOWN	protein_coding
MT.ND4	1.75778	10.884	31.1287	2.41473e-08	5.73126e-07	6.24175	UP	protein_coding
CCDC102B	-2.38123	1.13833	31.1093	2.43901e-08	5.77995e-07	6.23808	DOWN	protein_coding
H4C4	2.40686	3.44368	31.0913	2.46178e-08	5.81601e-07	6.23537	UP	protein_coding
TUBGCP2	0.406289	6.17923	31.0777	2.47906e-08	5.84785e-07	6.233	NO	protein_coding
BUB1B	2.78006	3.90285	31.0402	2.52745e-08	5.94772e-07	6.22565	UP	protein_coding
KIF22	1.83569	4.39641	31.0389	2.52914e-08	5.94772e-07	6.22565	UP	protein_coding
C5orf24	-0.559581	6.85967	31.0027	2.57669e-08	6.04164e-07	6.21884	NO	protein_coding
BACH2	-1.64034	2.25251	31.0025	2.57693e-08	6.04164e-07	6.21884	DOWN	protein_coding
COL4A5	-0.981337	6.4161	30.9939	2.58838e-08	6.05924e-07	6.21758	NO	protein_coding
S1PR3	-1.24576	6.75157	30.9882	2.59601e-08	6.06788e-07	6.21696	DOWN	protein_coding
ATMIN	-0.52455	5.82306	30.9519	2.64497e-08	6.17294e-07	6.20951	NO	protein_coding
C14orf132	-1.04958	6.33935	30.9478	2.65056e-08	6.17662e-07	6.20925	DOWN	protein_coding
STAT1	-0.637446	7.86272	30.907	2.70699e-08	6.29857e-07	6.20076	NO	protein_coding
MRPL24	0.875021	3.81747	30.8752	2.75164e-08	6.39279e-07	6.19431	NO	protein_coding
AJM1	1.01805	3.09549	30.8275	2.82017e-08	6.54212e-07	6.18428	UP	protein_coding
SLTM	0.604998	5.08332	30.779	2.89147e-08	6.69742e-07	6.17409	NO	protein_coding
ASF1B	2.86238	2.00183	30.697	3.01638e-08	6.97623e-07	6.15638	UP	protein_coding
BMERB1	-0.933875	4.01187	30.6408	3.10502e-08	7.17045e-07	6.14445	NO	protein_coding
EIF4B	-0.585121	8.96164	30.6322	3.11869e-08	7.19122e-07	6.1432	NO	protein_coding
H2BC7	2.18648	3.27637	30.6119	3.15161e-08	7.25624e-07	6.13929	UP	protein_coding
DYNC2I2	1.05334	3.6129	30.5979	3.17445e-08	7.29791e-07	6.1368	UP	protein_coding
ANXA1	0.773273	7.91945	30.5151	3.31282e-08	7.59333e-07	6.11957	NO	protein_coding
ASL	0.725784	4.4815	30.4945	3.34816e-08	7.6629e-07	6.11561	NO	protein_coding
OSBPL8	-0.519242	7.6696	30.4723	3.38672e-08	7.73964e-07	6.11128	NO	protein_coding
H4C11	1.91845	4.72552	30.4435	3.43731e-08	7.84359e-07	6.10549	UP	protein_coding
PLXNC1	-2.94422	2.92358	30.4125	3.4927e-08	7.95818e-07	6.09919	DOWN	protein_coding
BRCA2	2.03966	4.14556	30.3919	3.53e-08	8.01941e-07	6.09586	UP	protein_coding
ZSWIM4	-0.716048	4.42139	30.3869	3.53904e-08	8.0281e-07	6.09539	NO	protein_coding
STX12	-0.586864	6.05604	30.3722	3.56601e-08	8.07736e-07	6.09273	NO	protein_coding
BCL10	-0.467223	5.43648	30.368	3.57371e-08	8.0829e-07	6.09243	NO	protein_coding
GGT5	-2.1447	0.481432	30.3357	3.63373e-08	8.20657e-07	6.08584	DOWN	protein_coding
CLSPN	2.61602	4.02376	30.2668	3.76507e-08	8.48839e-07	6.07117	UP	protein_coding
NDC80	2.76724	3.02535	30.2645	3.76955e-08	8.48839e-07	6.07117	UP	protein_coding
H2BC9	2.12003	3.48117	30.2586	3.78116e-08	8.50208e-07	6.07048	UP	protein_coding
PSMC3	0.736095	5.91984	30.2206	3.856e-08	8.6577e-07	6.0626	NO	protein_coding
RECQL4	1.80511	3.25827	30.0425	4.22687e-08	9.46276e-07	6.02398	UP	protein_coding
ZNF3	-0.455694	4.84109	30.0185	4.27945e-08	9.56656e-07	6.01924	NO	protein_coding
MT.ATP8	1.62155	4.70112	30.002	4.316e-08	9.63427e-07	6.01618	UP	protein_coding
C2	-2.59129	-0.406118	29.8839	4.58709e-08	1.02246e-06	5.99036	DOWN	protein_coding
PDCL	-0.578434	3.99333	29.8753	4.60742e-08	1.0255e-06	5.98906	NO	protein_coding
MZT2B	0.820884	5.20984	29.8504	4.66703e-08	1.03577e-06	5.98474	NO	protein_coding
ESPL1	2.12007	3.41554	29.8318	4.71208e-08	1.04426e-06	5.98119	UP	protein_coding
H2BC14	3.30541	2.06061	29.8271	4.7235e-08	1.04529e-06	5.98076	UP	protein_coding
DENND10	-0.531293	5.49352	29.7966	4.79821e-08	1.06029e-06	5.97457	NO	protein_coding
TICRR	2.26951	3.12815	29.7881	4.81939e-08	1.06345e-06	5.97328	UP	protein_coding
IGBP1	-0.656175	4.84031	29.7724	4.8586e-08	1.07056e-06	5.97039	NO	protein_coding
PLK4	2.62492	3.14821	29.7566	4.89831e-08	1.07777e-06	5.96747	UP	protein_coding
HYI	0.956694	4.27096	29.742	4.93536e-08	1.08383e-06	5.96504	NO	protein_coding
MAP3K5	-0.865913	6.05865	29.7402	4.93997e-08	1.08383e-06	5.96504	NO	protein_coding
PSG2	2.74751	-0.336936	29.693	5.06172e-08	1.10896e-06	5.95508	UP	protein_coding
MAD2L1	2.0037	3.55809	29.6827	5.08863e-08	1.11327e-06	5.9534	UP	protein_coding
SULF2	-1.73872	3.17622	29.6693	5.12411e-08	1.11822e-06	5.95147	DOWN	protein_coding
IFNGR2	-0.611844	5.3956	29.6686	5.12577e-08	1.11822e-06	5.95147	NO	protein_coding
CRISPLD2	-1.45192	5.76468	29.5719	5.38803e-08	1.17221e-06	5.931	DOWN	protein_coding
E2F1	2.20277	2.76247	29.5717	5.38849e-08	1.17221e-06	5.931	UP	protein_coding
TP53INP1	-1.01397	6.5683	29.55	5.44929e-08	1.18376e-06	5.92674	DOWN	protein_coding
MCM4	1.41499	5.50869	29.5054	5.57598e-08	1.20957e-06	5.91737	UP	protein_coding
ALDH3A2	-0.907244	3.19352	29.4101	5.85729e-08	1.2688e-06	5.89661	NO	protein_coding
KIF14	2.69463	3.80614	29.3914	5.91387e-08	1.27926e-06	5.89304	UP	protein_coding
EBP	0.992197	3.54903	29.3788	5.95241e-08	1.28579e-06	5.89083	NO	protein_coding
RPL15	-0.504243	9.39479	29.316	6.14855e-08	1.32629e-06	5.87736	NO	protein_coding
ALDH2	-1.07935	5.19437	29.3011	6.19613e-08	1.33469e-06	5.87462	DOWN	protein_coding
RAP2A	-0.596943	5.27365	29.2867	6.24236e-08	1.34276e-06	5.872	NO	protein_coding
H2BC17	2.46221	3.22916	29.2836	6.25216e-08	1.34299e-06	5.87193	UP	protein_coding
MATN2	-1.18373	4.92526	29.2549	6.3456e-08	1.36116e-06	5.86609	DOWN	protein_coding
C7	-3.14425	5.03807	29.2371	6.40406e-08	1.37179e-06	5.86271	DOWN	protein_coding
GNPDA1	-0.68136	5.40985	29.2228	6.45143e-08	1.38001e-06	5.86012	NO	protein_coding
KDM7A	-0.831425	3.84719	29.1932	6.55085e-08	1.39761e-06	5.85461	NO	protein_coding
CDKN2C	2.19037	2.60882	29.1929	6.55186e-08	1.39761e-06	5.85461	UP	protein_coding
KIAA1755	-1.88624	2.19549	29.1677	6.63751e-08	1.41392e-06	5.84958	DOWN	protein_coding
CIPC	-0.521489	3.83724	29.1502	6.69787e-08	1.4248e-06	5.84625	NO	protein_coding
ATF2	-0.463506	5.51557	29.1296	6.76949e-08	1.43433e-06	5.84335	NO	protein_coding
KIF11	2.29663	5.00548	29.1293	6.77065e-08	1.43433e-06	5.84335	UP	protein_coding
H2AC21	2.25761	2.65374	29.1016	6.8679e-08	1.45094e-06	5.83835	UP	protein_coding
MEGF9	-0.876422	6.02992	29.0651	6.99849e-08	1.4765e-06	5.83077	NO	protein_coding
CDH4	0.837186	5.58203	29.0561	7.03108e-08	1.48134e-06	5.82934	NO	protein_coding
CDH2	1.11731	6.54094	29.0379	7.09749e-08	1.49329e-06	5.82586	UP	protein_coding
TBC1D14	-0.443148	5.68414	29.0346	7.10981e-08	1.49384e-06	5.8257	NO	protein_coding
H4C6	1.56448	4.11508	29.0287	7.13146e-08	1.49634e-06	5.82497	UP	protein_coding
PSMB6	0.746337	5.49372	28.9773	7.32309e-08	1.53413e-06	5.81414	NO	protein_coding
PNRC2	-0.474487	5.97814	28.9751	7.33151e-08	1.53413e-06	5.81414	NO	protein_coding
MYBL2	2.82471	3.28277	28.9503	7.42584e-08	1.55176e-06	5.80918	UP	protein_coding
NUDT1	1.35176	1.54842	28.9418	7.45863e-08	1.5565e-06	5.80785	UP	protein_coding
RC3H2	-0.389774	6.58946	28.9197	7.54421e-08	1.57222e-06	5.80349	NO	protein_coding
E2F2	2.61447	0.322984	28.9105	7.57996e-08	1.57753e-06	5.80202	UP	protein_coding
TIMM17B	0.670682	3.60019	28.8887	7.66572e-08	1.59323e-06	5.79772	NO	protein_coding
GNAQ	-0.410706	6.81546	28.8445	7.84287e-08	1.62784e-06	5.78839	NO	protein_coding
MAP2	-1.93682	1.19837	28.8306	7.89929e-08	1.63735e-06	5.78586	DOWN	protein_coding
NR2F1	-0.778137	6.12231	28.817	7.95494e-08	1.64454e-06	5.78395	NO	protein_coding
CLTB	0.868564	5.12395	28.8116	7.97735e-08	1.64687e-06	5.78334	NO	protein_coding
C11orf68	0.567126	5.72274	28.8073	7.99506e-08	1.64831e-06	5.78296	NO	protein_coding
GINS2	2.35152	1.945	28.7734	8.13628e-08	1.67493e-06	5.776	UP	protein_coding
MOB1A	-0.54453	7.19957	28.7711	8.14597e-08	1.67493e-06	5.776	NO	protein_coding
LAMTOR3	-0.549786	4.43416	28.7239	8.34681e-08	1.70404e-06	5.76852	NO	protein_coding
EPHB1	2.46325	2.01128	28.7223	8.3535e-08	1.70404e-06	5.76852	UP	protein_coding
CHMP1B	-0.577949	5.28784	28.722	8.35475e-08	1.70404e-06	5.76852	NO	protein_coding
TAGLN2	0.61059	7.99474	28.7212	8.35855e-08	1.70404e-06	5.76852	NO	protein_coding
MAN1C1	-1.43844	4.46352	28.7173	8.37505e-08	1.70404e-06	5.76852	DOWN	protein_coding
TRIB2	-0.71942	4.58943	28.7171	8.37618e-08	1.70404e-06	5.76852	NO	protein_coding
CAMK1	0.606325	3.69329	28.6761	8.55537e-08	1.7382e-06	5.7599	NO	protein_coding
PAIP2	-0.534654	4.90998	28.6444	8.69637e-08	1.76451e-06	5.75337	NO	protein_coding
SCARA3	0.759306	6.94593	28.5969	8.91232e-08	1.80595e-06	5.74329	NO	protein_coding
ADRB2	1.73219	2.33844	28.5896	8.94618e-08	1.81042e-06	5.74222	UP	protein_coding
C13orf46	1.2046	2.74223	28.5694	9.03997e-08	1.827e-06	5.73826	UP	protein_coding
MYDGF	0.706912	6.36696	28.5602	9.08315e-08	1.83332e-06	5.73676	NO	protein_coding
NEPRO	-0.517686	5.00647	28.5481	9.13994e-08	1.84236e-06	5.73463	NO	protein_coding
SH3BGRL3	1.27324	7.75068	28.5294	9.22859e-08	1.8578e-06	5.731	UP	protein_coding
GUCY1B1	-2.69121	3.36784	28.4982	9.37874e-08	1.88556e-06	5.72456	DOWN	protein_coding
WNT2B	-2.28668	2.57279	28.4324	9.70261e-08	1.94812e-06	5.71038	DOWN	protein_coding
ARHGAP5	-0.539173	7.26775	28.3922	9.90616e-08	1.9864e-06	5.70193	NO	protein_coding
CMBL	-0.732042	5.05822	28.386	9.93796e-08	1.99018e-06	5.70111	NO	protein_coding
PTGDS	-3.26849	2.60638	28.3798	9.96999e-08	1.994e-06	5.70028	DOWN	protein_coding
RNF141	-0.724228	5.42444	28.3603	1.00708e-07	2.01155e-06	5.69647	NO	protein_coding
RPS4X	-0.567037	8.24215	28.2947	1.04181e-07	2.07821e-06	5.68231	NO	protein_coding
MYO18A	0.569759	7.14761	28.2912	1.04369e-07	2.07928e-06	5.68209	NO	protein_coding
LRRC49	-1.06496	3.6055	28.2565	1.06257e-07	2.11413e-06	5.67487	DOWN	protein_coding
NCAPG	2.76912	3.99081	28.2415	1.07086e-07	2.12789e-06	5.67205	UP	protein_coding
EZR	1.15702	6.97725	28.2297	1.07737e-07	2.13806e-06	5.66998	UP	protein_coding
H2AC17	2.03216	3.63374	28.2209	1.0823e-07	2.14508e-06	5.66856	UP	protein_coding
MCM2	1.70337	4.2949	28.2097	1.08856e-07	2.15471e-06	5.66661	UP	protein_coding
HMGN2	0.917266	7.08978	28.1634	1.11495e-07	2.2041e-06	5.65677	NO	protein_coding
PLEKHN1	1.56023	2.76849	28.1435	1.12644e-07	2.22396e-06	5.65287	UP	protein_coding
CLMP	-0.77059	8.21014	28.1374	1.12999e-07	2.22682e-06	5.65231	NO	protein_coding
ERCC6L	2.95588	2.68013	28.1361	1.13079e-07	2.22682e-06	5.65231	UP	protein_coding
EIF2S3	-0.541961	7.84576	27.9743	1.22939e-07	2.4179e-06	5.61656	NO	protein_coding
EML5	1.17289	2.339	27.9102	1.27081e-07	2.48981e-06	5.60383	UP	protein_coding
TMTC2	-1.8691	1.75439	27.9066	1.27317e-07	2.49126e-06	5.60358	DOWN	protein_coding
MT.ND1	1.72042	8.62409	27.8758	1.29356e-07	2.52473e-06	5.59778	UP	protein_coding
SSTR1	1.62073	4.15813	27.8641	1.30145e-07	2.53691e-06	5.59569	UP	protein_coding
EPN1	0.466122	7.26898	27.8389	1.31846e-07	2.56683e-06	5.5906	NO	protein_coding
ARHGAP11A	1.66508	5.2414	27.779	1.35997e-07	2.64095e-06	5.57824	UP	protein_coding
TIMP3	-1.56511	10.0939	27.7644	1.37022e-07	2.65749e-06	5.57553	DOWN	protein_coding
CCNL2	-0.564711	7.42105	27.7468	1.38274e-07	2.67841e-06	5.57212	NO	protein_coding
NCAPG2	1.64846	4.72751	27.6633	1.44374e-07	2.78953e-06	5.55447	UP	protein_coding
UQCRHL	1.9811	-0.346776	27.6312	1.46792e-07	2.8327e-06	5.5478	UP	protein_coding
CFL1	0.517036	9.17674	27.5692	1.51574e-07	2.91765e-06	5.53497	NO	protein_coding
SEL1L3	-0.936535	5.72706	27.5601	1.52288e-07	2.92572e-06	5.53377	NO	protein_coding
RAD54L	2.63083	1.99684	27.559	1.52373e-07	2.92572e-06	5.53377	UP	protein_coding
CYTL1	-2.29687	1.27296	27.5509	1.53017e-07	2.93441e-06	5.53248	DOWN	protein_coding
STAT3	-0.561936	7.56679	27.507	1.56524e-07	2.99531e-06	5.52356	NO	protein_coding
HIPK3	-0.522658	7.09584	27.5063	1.56582e-07	2.99531e-06	5.52356	NO	protein_coding
PPP5C	0.582602	5.49465	27.4678	1.59733e-07	3.04999e-06	5.5157	NO	protein_coding
ADGRL1	-1.10512	2.94782	27.4665	1.59837e-07	3.04999e-06	5.5157	DOWN	protein_coding
H3C4	1.93906	4.12052	27.45	1.61213e-07	3.07244e-06	5.51252	UP	protein_coding
ALAS1	-0.677226	5.55911	27.4324	1.62683e-07	3.09661e-06	5.50911	NO	protein_coding
LEO1	0.825775	3.51101	27.4115	1.64454e-07	3.12646e-06	5.50495	NO	protein_coding
GPKOW	0.677749	3.36959	27.3704	1.67981e-07	3.18956e-06	5.49627	NO	protein_coding
KISS1	2.60595	1.76046	27.35	1.69765e-07	3.21947e-06	5.49222	UP	protein_coding
DACT3	-0.829136	4.026	27.3387	1.7076e-07	3.23435e-06	5.49021	NO	protein_coding
FOXL1	-0.645858	6.49733	27.3346	1.71123e-07	3.23724e-06	5.48983	NO	protein_coding
ATP6V1C1	-0.451715	6.05657	27.2785	1.76155e-07	3.32833e-06	5.47777	NO	protein_coding
C21orf91	-0.692466	4.18317	27.2415	1.79564e-07	3.38857e-06	5.46998	NO	protein_coding
ZBTB41	-0.465909	5.50983	27.2282	1.80801e-07	3.40775e-06	5.46753	NO	protein_coding
SULT1A1	-1.95338	-0.430541	27.2192	1.81642e-07	3.41941e-06	5.46605	DOWN	protein_coding
ADD3	-0.620955	7.26182	27.1988	1.8357e-07	3.45147e-06	5.462	NO	protein_coding
CCNF	1.7803	4.03265	27.1818	1.85194e-07	3.47776e-06	5.4587	UP	protein_coding
MTCL3	0.981623	2.81315	27.1412	1.89127e-07	3.54728e-06	5.4501	NO	protein_coding
LMNB1	2.32783	4.53214	27.1346	1.89767e-07	3.55495e-06	5.44917	UP	protein_coding
PLSCR1	-0.701811	3.59983	27.0965	1.93545e-07	3.62131e-06	5.44113	NO	protein_coding
KCTD15	-0.807188	4.18722	27.0768	1.95533e-07	3.65291e-06	5.43736	NO	protein_coding
H2BC11	2.12243	2.77156	27.0714	1.96077e-07	3.65534e-06	5.43707	UP	protein_coding
FHL1	-1.24649	6.06034	27.0303	2.0029e-07	3.72938e-06	5.42836	DOWN	protein_coding
SPTAN1	0.521591	9.47094	27.0186	2.01508e-07	3.74752e-06	5.42626	NO	protein_coding
CEP128	2.09346	2.70035	26.9695	2.0669e-07	3.83924e-06	5.41575	UP	protein_coding
RPL34	-0.47672	7.01003	26.9592	2.07796e-07	3.85513e-06	5.41396	NO	protein_coding
CHTF18	1.82064	3.58161	26.9548	2.08273e-07	3.85932e-06	5.41349	UP	protein_coding
PLEC	0.924251	10.306	26.9109	2.13054e-07	3.94317e-06	5.40415	NO	protein_coding
TBXAS1	-1.44127	3.42124	26.9083	2.13341e-07	3.94358e-06	5.40411	DOWN	protein_coding
SKA3	2.45973	2.78808	26.9061	2.13589e-07	3.94358e-06	5.40411	UP	protein_coding
LRRN3	0.960914	4.9275	26.8641	2.18277e-07	4.02172e-06	5.39559	NO	protein_coding
NCAPD2	1.15122	6.05111	26.8635	2.18344e-07	4.02172e-06	5.39559	UP	protein_coding
MEAF6	-0.397838	5.11962	26.839	2.21124e-07	4.06805e-06	5.39061	NO	protein_coding
SLC8A1	0.61664	6.87007	26.8216	2.23128e-07	4.10001e-06	5.38722	NO	protein_coding
ARHGAP22	1.18159	5.66953	26.7968	2.26013e-07	4.14806e-06	5.38215	UP	protein_coding
SLC37A2	1.85964	1.74264	26.7862	2.27257e-07	4.16593e-06	5.38029	UP	protein_coding
H1.4	1.58227	4.61955	26.7171	2.35527e-07	4.30789e-06	5.36574	UP	protein_coding
ARL8B	-0.533135	6.38909	26.7168	2.35561e-07	4.30789e-06	5.36574	NO	protein_coding
H2AC12	2.23586	3.54162	26.6692	2.41445e-07	4.41024e-06	5.35554	UP	protein_coding
DPY19L3	-0.518879	6.11149	26.6012	2.50086e-07	4.56266e-06	5.34078	NO	protein_coding
NT5C2	-0.439406	6.97789	26.5696	2.54218e-07	4.62936e-06	5.33448	NO	protein_coding
LIMD1	-0.501028	6.85842	26.4732	2.67217e-07	4.85792e-06	5.31355	NO	protein_coding
MMP1	1.79599	7.53272	26.4662	2.68196e-07	4.86995e-06	5.31248	UP	protein_coding
MMP23B	-1.36029	1.87088	26.4508	2.70338e-07	4.90306e-06	5.30953	DOWN	protein_coding
RPL39L	1.51639	1.03837	26.4477	2.70765e-07	4.90502e-06	5.30936	UP	protein_coding
BTAF1	-0.415807	6.32962	26.4378	2.72157e-07	4.92443e-06	5.30764	NO	protein_coding
KIF24	2.41252	1.7194	26.4157	2.7529e-07	4.97528e-06	5.30318	UP	protein_coding
H2BC4	1.04212	5.11079	26.4059	2.76698e-07	4.99485e-06	5.30148	UP	protein_coding
INCENP	1.40686	4.63087	26.3851	2.79686e-07	5.04288e-06	5.29732	UP	protein_coding
RAD51	1.96577	1.36072	26.3767	2.80907e-07	5.05895e-06	5.29594	UP	protein_coding
ACTN4	0.602436	9.81855	26.3685	2.82108e-07	5.07465e-06	5.29459	NO	protein_coding
SIX4	-0.919638	5.82718	26.359	2.83491e-07	5.09357e-06	5.29298	NO	protein_coding
RBM42	0.553307	5.43013	26.3293	2.8789e-07	5.16657e-06	5.2868	NO	protein_coding
BCL2L11	-1.73568	1.7984	26.3191	2.89417e-07	5.18792e-06	5.28501	DOWN	protein_coding
ZNF805	-0.4939	5.44551	26.3093	2.90877e-07	5.20197e-06	5.28383	NO	protein_coding
ATP1B1	0.920826	5.54647	26.2595	2.9848e-07	5.33173e-06	5.27313	NO	protein_coding
GSS	0.499771	5.11787	26.2397	3.01551e-07	5.38035e-06	5.26919	NO	protein_coding
DESI2	-0.51529	6.0402	26.187	3.09902e-07	5.52294e-06	5.25783	NO	protein_coding
PLPPR3	-1.30986	2.27965	26.1675	3.1305e-07	5.57259e-06	5.25394	DOWN	protein_coding
TBL1XR1	-0.640367	7.86091	26.1608	3.1414e-07	5.58552e-06	5.25294	NO	protein_coding
RTL3	2.42816	-0.253657	26.1483	3.16173e-07	5.61517e-06	5.25064	UP	protein_coding
ST3GAL5	-0.996846	3.42438	26.1026	3.2375e-07	5.73708e-06	5.24131	NO	protein_coding
GCLM	-1.18595	6.24541	26.1024	3.23783e-07	5.73708e-06	5.24131	DOWN	protein_coding
NUF2	2.82833	2.80938	26.0968	3.24716e-07	5.74698e-06	5.24056	UP	protein_coding
ZNF414	0.687953	2.76923	26.0837	3.26935e-07	5.77962e-06	5.2381	NO	protein_coding
LZTFL1	-0.613321	3.82219	26.0573	3.31439e-07	5.8525e-06	5.23266	NO	protein_coding
NDUFB7	0.689674	4.11806	26.0484	3.32971e-07	5.87282e-06	5.23115	NO	protein_coding
TFDP2	-0.728849	5.13279	26.0172	3.38396e-07	5.96165e-06	5.22463	NO	protein_coding
PYCR2	0.478369	4.60266	26.0149	3.38794e-07	5.96185e-06	5.22462	NO	protein_coding
SMIM14	-0.811133	5.78197	25.9792	3.45111e-07	6.06606e-06	5.21709	NO	protein_coding
NCAPH	2.95693	3.10981	25.9713	3.46527e-07	6.08401e-06	5.21581	UP	protein_coding
ZDHHC4	-0.608775	3.85878	25.9579	3.48947e-07	6.1195e-06	5.21328	NO	protein_coding
GAS2L1	0.753887	4.88728	25.9446	3.51355e-07	6.15442e-06	5.21081	NO	protein_coding
TNK2	0.561307	5.62432	25.9425	3.51738e-07	6.15442e-06	5.21081	NO	protein_coding
CLIC1	0.607752	8.12244	25.9205	3.55767e-07	6.21783e-06	5.20636	NO	protein_coding
PFN1	0.543802	9.17575	25.9004	3.59496e-07	6.27588e-06	5.20233	NO	protein_coding
RAD51AP1	2.38472	1.92143	25.8887	3.61672e-07	6.30671e-06	5.2002	UP	protein_coding
GATAD1	-0.577247	5.28901	25.8492	3.6916e-07	6.42999e-06	5.19179	NO	protein_coding
SIPA1L1	-0.549279	6.80791	25.8425	3.70449e-07	6.43858e-06	5.19121	NO	protein_coding
PRKD3	-0.620644	6.09266	25.8422	3.70491e-07	6.43858e-06	5.19121	NO	protein_coding
HDGFL2	0.655731	5.35224	25.8334	3.72184e-07	6.46071e-06	5.18972	NO	protein_coding
LIPE	1.31731	1.1418	25.8257	3.73685e-07	6.47946e-06	5.18846	UP	protein_coding
PDLIM1	-0.650153	7.19394	25.7827	3.82104e-07	6.61797e-06	5.17927	NO	protein_coding
ZDHHC8	0.555588	6.19103	25.7779	3.83043e-07	6.62603e-06	5.17875	NO	protein_coding
TPM3	0.543369	8.25231	25.776	3.83431e-07	6.62603e-06	5.17875	NO	protein_coding
KIAA0930	-0.799416	6.04581	25.7679	3.85034e-07	6.64627e-06	5.17742	NO	protein_coding
CDT1	2.18766	3.39625	25.752	3.88233e-07	6.69397e-06	5.17432	UP	protein_coding
DIO2	-1.83808	5.97063	25.74	3.90638e-07	6.72789e-06	5.17212	DOWN	protein_coding
NLRP1	0.509615	6.01649	25.7289	3.92901e-07	6.75931e-06	5.1701	NO	protein_coding
CDCA2	2.17639	4.01153	25.7038	3.98044e-07	6.84013e-06	5.16494	UP	protein_coding
SKA1	2.78875	2.8147	25.693	4.00283e-07	6.87093e-06	5.16298	UP	protein_coding
ACP1	-0.438107	5.40914	25.6824	4.02483e-07	6.90099e-06	5.16109	NO	protein_coding
RGS2	-1.82736	2.2976	25.6604	4.07089e-07	6.97219e-06	5.15663	DOWN	protein_coding
LITAF	-0.992459	6.82298	25.6514	4.08999e-07	6.99711e-06	5.15508	NO	protein_coding
H2BC6	2.14314	2.97869	25.6378	4.11891e-07	7.03875e-06	5.1525	UP	protein_coding
STOML1	0.60149	3.772	25.6254	4.14539e-07	7.07615e-06	5.1502	NO	protein_coding
ARHGDIA	0.658487	8.61839	25.5862	4.23059e-07	7.21358e-06	5.14185	NO	protein_coding
H2AC8	1.90116	4.61544	25.5648	4.27772e-07	7.28586e-06	5.13752	UP	protein_coding
PODN	-1.66335	3.86616	25.5459	4.31974e-07	7.34929e-06	5.13375	DOWN	protein_coding
MT.CO2	1.52241	10.173	25.5257	4.36533e-07	7.41865e-06	5.12967	UP	protein_coding
GYS1	0.78882	6.41725	25.5033	4.41621e-07	7.49683e-06	5.12512	NO	protein_coding
UHRF1	1.58392	5.87345	25.4719	4.48867e-07	7.61144e-06	5.11853	UP	protein_coding
RFX1	0.696851	4.18774	25.4474	4.54622e-07	7.69206e-06	5.11396	NO	protein_coding
GRHL1	-1.93948	-0.268916	25.3998	4.65974e-07	7.87547e-06	5.10372	DOWN	protein_coding
SNRPC	0.507133	5.04616	25.3805	4.70662e-07	7.94597e-06	5.09985	NO	protein_coding
TMEM18	0.564235	3.85195	25.3341	4.82116e-07	8.13042e-06	5.08989	NO	protein_coding
CTSZ	0.57258	6.32078	25.2454	5.04788e-07	8.50343e-06	5.07041	NO	protein_coding
NUP214	0.371045	6.37937	25.1816	5.21772e-07	8.77993e-06	5.05651	NO	protein_coding
AP1B1	0.402183	6.70673	25.1753	5.23493e-07	8.79128e-06	5.05595	NO	protein_coding
CENPI	1.86251	3.68037	25.1749	5.2359e-07	8.79128e-06	5.05595	UP	protein_coding
DDHD1	-0.406432	5.30403	25.1475	5.31074e-07	8.90721e-06	5.05026	NO	protein_coding
GPBP1L1	-0.328332	6.21586	25.1191	5.38961e-07	9.02965e-06	5.04433	NO	protein_coding
EME1	2.07871	1.17088	25.1112	5.41167e-07	9.05674e-06	5.04303	UP	protein_coding
TBC1D1	0.563973	6.18195	25.0322	5.6382e-07	9.42559e-06	5.02569	NO	protein_coding
CTHRC1	-0.898757	6.95729	24.9969	5.74223e-07	9.58909e-06	5.01822	NO	protein_coding
KMT2D	0.710941	7.93469	24.9444	5.9007e-07	9.84304e-06	5.00687	NO	protein_coding
PPP1R12B	-0.710583	5.37549	24.9275	5.95284e-07	9.91925e-06	5.00352	NO	protein_coding
FKBP2	1.29628	2.39324	24.9151	5.99099e-07	9.97202e-06	5.00122	UP	protein_coding
TGM2	-0.987372	8.57658	24.9047	6.02355e-07	1.00154e-05	4.99933	NO	protein_coding
HACD1	0.707293	3.81962	24.901	6.03498e-07	1.00235e-05	4.99898	NO	protein_coding
SCAF1	0.58158	7.2677	24.7738	6.4469e-07	1.06846e-05	4.97124	NO	protein_coding
H1.1	2.12425	2.28629	24.7705	6.45795e-07	1.06914e-05	4.97096	UP	protein_coding
SNRPA	0.626908	4.94074	24.7269	6.60566e-07	1.08904e-05	4.96296	NO	protein_coding
TPM2	1.05499	8.95887	24.7266	6.60646e-07	1.08904e-05	4.96296	UP	protein_coding
CKAP2	1.18267	5.65631	24.6886	6.73805e-07	1.10954e-05	4.95486	UP	protein_coding
KANK2	-0.402424	7.6288	24.6852	6.75017e-07	1.11035e-05	4.95454	NO	protein_coding
SMC4	1.35006	6.49503	24.6737	6.79048e-07	1.11579e-05	4.95242	UP	protein_coding
ERRFI1	-1.31159	6.31642	24.6324	6.93768e-07	1.13876e-05	4.94357	DOWN	protein_coding
KNTC1	1.31993	4.80546	24.5986	7.06035e-07	1.15643e-05	4.93688	UP	protein_coding
S100A3	1.28379	0.0704184	24.5986	7.06042e-07	1.15643e-05	4.93688	UP	protein_coding
H2BC3	2.61822	0.398181	24.589	7.09549e-07	1.16094e-05	4.93519	UP	protein_coding
LHFPL2	-1.09147	5.55123	24.5682	7.17274e-07	1.16922e-05	4.93211	DOWN	protein_coding
ATP5IF1	0.891778	4.036	24.5672	7.17646e-07	1.16922e-05	4.93211	NO	protein_coding
RBM10	0.405575	5.66503	24.5238	7.33964e-07	1.19327e-05	4.92326	NO	protein_coding
DOCK1	-0.416721	7.13815	24.5022	7.42261e-07	1.20549e-05	4.91884	NO	protein_coding
RAD1	-0.567687	4.78485	24.4648	7.56812e-07	1.22653e-05	4.91132	NO	protein_coding
TSPAN3	-0.499705	6.74448	24.4621	7.57873e-07	1.22696e-05	4.91117	NO	protein_coding
SNX15	0.578858	3.86092	24.4593	7.58961e-07	1.22743e-05	4.911	NO	protein_coding
DBF4B	1.41285	3.16135	24.3913	7.86216e-07	1.27017e-05	4.89614	UP	protein_coding
FAM131B	-1.04908	2.1966	24.3774	7.91919e-07	1.27804e-05	4.89346	DOWN	protein_coding
ZNF8	-0.412013	4.53943	24.3661	7.96573e-07	1.2842e-05	4.89137	NO	protein_coding
PHLDB2	-1.07086	5.35454	24.3524	8.02281e-07	1.29205e-05	4.88872	DOWN	protein_coding
H3C10	1.87806	3.73177	24.3346	8.09699e-07	1.30263e-05	4.88518	UP	protein_coding
H2BC13	2.31397	2.44072	24.3237	8.14305e-07	1.30867e-05	4.88317	UP	protein_coding
YY1	-0.473003	6.46488	24.3115	8.19491e-07	1.31563e-05	4.88087	NO	protein_coding
ANXA2	0.631352	10.5464	24.29	8.28699e-07	1.32903e-05	4.87647	NO	protein_coding
IL27RA	-0.766361	2.56878	24.257	8.43015e-07	1.35058e-05	4.86948	NO	protein_coding
RPS6KA2	-1.33374	6.07041	24.2397	8.50595e-07	1.36131e-05	4.86604	DOWN	protein_coding
TNFRSF10B	-0.397447	7.71311	24.2323	8.53878e-07	1.36514e-05	4.86482	NO	protein_coding
PDAP1	0.452555	5.75428	24.213	8.62474e-07	1.37745e-05	4.86092	NO	protein_coding
ANTXR1	-0.788729	8.32849	24.2104	8.63634e-07	1.37787e-05	4.86079	NO	protein_coding
ADAMTSL1	1.09126	6.05476	24.1957	8.70259e-07	1.387e-05	4.85792	UP	protein_coding
MBTD1	-0.602027	3.76606	24.1792	8.7777e-07	1.39753e-05	4.85464	NO	protein_coding
IPCEF1	-2.51591	-0.672047	24.1692	8.82308e-07	1.4033e-05	4.85285	DOWN	protein_coding
ATAD2	1.42458	5.18427	24.1155	9.07277e-07	1.44152e-05	4.84118	UP	protein_coding
FLNC	1.04109	11.3669	24.0779	9.25158e-07	1.46841e-05	4.83315	UP	protein_coding
MT.ND3	1.75607	6.96644	24.062	9.32841e-07	1.47908e-05	4.83001	UP	protein_coding
AKR1C1	-2.07651	4.87421	24.0489	9.39209e-07	1.48765e-05	4.8275	DOWN	protein_coding
ZBTB34	-0.824126	4.31338	24.011	9.5785e-07	1.51561e-05	4.81941	NO	protein_coding
PAMR1	-0.84608	7.02585	23.9817	9.72544e-07	1.53728e-05	4.81325	NO	protein_coding
CDR2	-0.830084	5.13062	23.9751	9.75918e-07	1.54103e-05	4.81219	NO	protein_coding
RGS17	-1.06067	3.37835	23.9179	1.00533e-06	1.58421e-05	4.80019	DOWN	protein_coding
MSI2	-0.637258	6.1321	23.8863	1.02196e-06	1.60878e-05	4.7935	NO	protein_coding
SEC11C	1.03565	2.39975	23.863	1.03442e-06	1.62673e-05	4.78869	UP	protein_coding
FAM117B	-1.41099	3.42995	23.8459	1.04365e-06	1.63957e-05	4.78527	DOWN	protein_coding
H2AC4	2.26054	2.41667	23.8288	1.05295e-06	1.65248e-05	4.78186	UP	protein_coding
GPR153	-0.595257	4.11909	23.8153	1.06037e-06	1.66173e-05	4.77944	NO	protein_coding
NDUFS6	1.04415	3.53467	23.8132	1.0615e-06	1.66173e-05	4.77944	UP	protein_coding
SUN2	0.876559	6.37259	23.8122	1.06208e-06	1.66173e-05	4.77944	NO	protein_coding
CDCA5	2.2961	3.26861	23.8001	1.06877e-06	1.67049e-05	4.77716	UP	protein_coding
PEX13	-0.35622	4.70499	23.7865	1.07634e-06	1.68062e-05	4.77453	NO	protein_coding
VARS1	0.550693	6.8767	23.749	1.09753e-06	1.71196e-05	4.76651	NO	protein_coding
ZC3H3	0.554193	4.62851	23.722	1.11302e-06	1.73437e-05	4.76086	NO	protein_coding
MSRB3	-0.485325	6.88483	23.7085	1.12088e-06	1.74485e-05	4.75824	NO	protein_coding
GABARAPL1	-0.978356	6.62944	23.6967	1.12777e-06	1.7538e-05	4.75602	NO	protein_coding
LSM4	0.67199	4.96224	23.6849	1.13467e-06	1.76275e-05	4.75381	NO	protein_coding
FNDC3B	-0.56107	8.48542	23.6804	1.13735e-06	1.76513e-05	4.75322	NO	protein_coding
CAMLG	-0.509421	4.79029	23.6708	1.14302e-06	1.77213e-05	4.7515	NO	protein_coding
TCF19	1.84163	3.70624	23.6348	1.16462e-06	1.80382e-05	4.74381	UP	protein_coding
PSD3	-0.893525	6.3836	23.62	1.1736e-06	1.81559e-05	4.74098	NO	protein_coding
NAA50	-0.537516	7.14052	23.6184	1.17458e-06	1.81559e-05	4.74098	NO	protein_coding
TIPARP	0.915939	6.13369	23.6074	1.1813e-06	1.82414e-05	4.73894	NO	protein_coding
TTC3	-0.412782	8.77646	23.6021	1.18458e-06	1.82736e-05	4.73818	NO	protein_coding
SYNM	0.996405	3.61	23.5903	1.19188e-06	1.83679e-05	4.73594	NO	protein_coding
STAM2	-0.365945	5.94672	23.5769	1.20018e-06	1.84772e-05	4.73336	NO	protein_coding
ZNF260	-0.584746	5.00164	23.5439	1.22096e-06	1.87595e-05	4.72678	NO	protein_coding
MDM2	-0.759774	8.77702	23.5115	1.24167e-06	1.90588e-05	4.7199	NO	protein_coding
FTSJ3	0.517415	5.43218	23.5029	1.24725e-06	1.91253e-05	4.71839	NO	protein_coding
XKR8	0.660996	3.51653	23.4764	1.26453e-06	1.9371e-05	4.71285	NO	protein_coding
MTHFD1	0.681583	5.80741	23.4293	1.29588e-06	1.98118e-05	4.70308	NO	protein_coding
AJUBA	0.540601	6.46053	23.4075	1.31067e-06	2.00179e-05	4.69858	NO	protein_coding
RNF217	-0.515543	5.75948	23.3631	1.34129e-06	2.04519e-05	4.68927	NO	protein_coding
UFM1	-0.508958	6.49137	23.3624	1.34174e-06	2.04519e-05	4.68927	NO	protein_coding
MRPS28	0.768628	2.74417	23.341	1.35678e-06	2.06452e-05	4.68518	NO	protein_coding
DCTN3	0.439325	4.83458	23.3405	1.3571e-06	2.06452e-05	4.68518	NO	protein_coding
DPP9	0.528461	6.6656	23.337	1.35958e-06	2.06501e-05	4.68508	NO	protein_coding
LMNB2	0.84422	6.88881	23.3363	1.36011e-06	2.06501e-05	4.68508	NO	protein_coding
FOXN3	-0.595741	7.00775	23.3341	1.36166e-06	2.06531e-05	4.68501	NO	protein_coding
CCDC18	1.23156	2.93948	23.3322	1.363e-06	2.06532e-05	4.68501	UP	protein_coding
BLM	2.35737	2.14735	23.2904	1.39295e-06	2.10861e-05	4.676	UP	protein_coding
TLE2	-2.24851	-0.592759	23.2822	1.39891e-06	2.11556e-05	4.67457	DOWN	protein_coding
MOB3B	-3.36609	-1.14606	23.2088	1.45334e-06	2.19572e-05	4.65842	DOWN	protein_coding
FANCA	1.97969	3.41361	23.1639	1.48764e-06	2.24532e-05	4.64872	UP	protein_coding
NDUFB10	0.715151	4.57819	23.1569	1.4931e-06	2.25135e-05	4.64756	NO	protein_coding
FRYL	0.494518	6.32821	23.1311	1.51327e-06	2.27953e-05	4.64215	NO	protein_coding
PPP1R14B	0.877401	6.0454	23.0987	1.53895e-06	2.31595e-05	4.63527	NO	protein_coding
BCL7C	0.615221	4.84004	23.0779	1.55568e-06	2.33884e-05	4.631	NO	protein_coding
POLR2F	0.843881	2.96047	23.0595	1.57062e-06	2.3573e-05	4.62759	NO	protein_coding
MLXIP	-0.643227	6.30746	23.059	1.57102e-06	2.3573e-05	4.62759	NO	protein_coding
EDN1	1.61943	3.73539	23.0451	1.58243e-06	2.37211e-05	4.62487	UP	protein_coding
FRS2	-0.455386	5.60895	23.0399	1.58674e-06	2.37625e-05	4.62411	NO	protein_coding
ITGAV	-0.592783	8.5826	22.9622	1.65215e-06	2.4694e-05	4.60741	NO	protein_coding
PHF10	-0.56556	5.00968	22.957	1.65665e-06	2.47371e-05	4.60665	NO	protein_coding
DOCK9	0.661115	4.96993	22.9182	1.69047e-06	2.52177e-05	4.5983	NO	protein_coding
GMFG	4.11783	-0.633283	22.8979	1.70835e-06	2.54597e-05	4.59415	UP	protein_coding
RELB	-0.727559	4.42665	22.8894	1.71592e-06	2.55478e-05	4.59265	NO	protein_coding
CDC45	2.43831	1.96968	22.8629	1.73981e-06	2.58534e-05	4.58748	UP	protein_coding
CACNA1H	-1.67735	1.506	22.8389	1.76161e-06	2.6152e-05	4.58249	DOWN	protein_coding
UBE2W	-0.502671	5.0119	22.8296	1.77016e-06	2.62284e-05	4.58123	NO	protein_coding
PRKCI	-0.63229	6.74312	22.8223	1.77692e-06	2.63032e-05	4.57999	NO	protein_coding
ANKRD1	3.70436	1.47086	22.8071	1.79103e-06	2.64866e-05	4.57697	UP	protein_coding
MAP1LC3B2	1.48846	-0.41576	22.8022	1.79564e-06	2.65292e-05	4.57628	UP	protein_coding
DTL	2.5771	3.65218	22.7742	1.82193e-06	2.68661e-05	4.5708	UP	protein_coding
AHNAK	0.749632	11.7429	22.7573	1.83806e-06	2.70521e-05	4.5678	NO	protein_coding
DNMBP	0.601547	6.55544	22.7462	1.8487e-06	2.71826e-05	4.56571	NO	protein_coding
PRRC1	-0.462668	7.08549	22.7153	1.87867e-06	2.75968e-05	4.55914	NO	protein_coding
MFAP5	3.18718	0.391293	22.6953	1.89828e-06	2.78583e-05	4.55504	UP	protein_coding
ITGB3	-0.982453	5.60136	22.6428	1.95088e-06	2.85758e-05	4.544	NO	protein_coding
H1.3	1.99932	4.32674	22.6219	1.9722e-06	2.88605e-05	4.5397	UP	protein_coding
PRXL2B	0.614372	4.51764	22.6182	1.97606e-06	2.88896e-05	4.53926	NO	protein_coding
SGO1	2.75309	1.84728	22.5205	2.07918e-06	3.03682e-05	4.51758	UP	protein_coding
CHAF1A	1.39311	3.78019	22.5088	2.09181e-06	3.05123e-05	4.51553	UP	protein_coding
BNIP2	-0.344415	6.48326	22.5077	2.09303e-06	3.05123e-05	4.51553	NO	protein_coding
URGCP	0.431152	5.3193	22.4715	2.13281e-06	3.10337e-05	4.50817	NO	protein_coding
APPBP2	-0.428376	6.43217	22.4594	2.14628e-06	3.12001e-05	4.50584	NO	protein_coding
SKAP2	-0.554898	5.02422	22.4557	2.15048e-06	3.12317e-05	4.5054	NO	protein_coding
PTGES	-2.00874	2.16868	22.4415	2.16646e-06	3.14341e-05	4.5026	DOWN	protein_coding
GIPC1	0.612165	6.29617	22.432	2.17713e-06	3.15592e-05	4.50087	NO	protein_coding
ISOC1	-0.751883	3.17855	22.3999	2.21389e-06	3.20618e-05	4.49401	NO	protein_coding
PSMC3IP	1.75152	1.55982	22.3792	2.23784e-06	3.23782e-05	4.48975	UP	protein_coding
TNFSF18	-1.92491	1.08623	22.3605	2.2598e-06	3.26652e-05	4.48592	DOWN	protein_coding
UBTD2	-0.600323	4.74828	22.3485	2.27387e-06	3.28351e-05	4.48366	NO	protein_coding
PFKP	0.571102	7.32951	22.3469	2.27583e-06	3.28351e-05	4.48366	NO	protein_coding
USP3	-0.501847	4.93396	22.3401	2.28384e-06	3.29199e-05	4.48254	NO	protein_coding
MICA	0.784289	5.71805	22.317	2.31151e-06	3.32875e-05	4.47772	NO	protein_coding
FILIP1L	-0.606747	6.72568	22.2884	2.34621e-06	3.3724e-05	4.47206	NO	protein_coding
ANK2	-1.04495	3.73057	22.278	2.35899e-06	3.3876e-05	4.47011	DOWN	protein_coding
DNASE1L1	0.594908	5.13191	22.2599	2.3813e-06	3.41645e-05	4.46642	NO	protein_coding
ZNF367	2.91514	2.04124	22.2572	2.38466e-06	3.41808e-05	4.46622	UP	protein_coding
ZNF106	-0.627502	8.37277	22.2526	2.3904e-06	3.42312e-05	4.46558	NO	protein_coding
CARNMT1	-0.607964	4.97266	22.2279	2.42133e-06	3.46419e-05	4.4604	NO	protein_coding
CYRIA	-0.836574	3.3052	22.211	2.4427e-06	3.49151e-05	4.45699	NO	protein_coding
GALNT6	0.85461	6.02667	22.2076	2.44704e-06	3.49448e-05	4.45662	NO	protein_coding
TSR3	0.722145	4.03482	22.2024	2.45369e-06	3.50072e-05	4.45584	NO	protein_coding
AP3S1	-0.467337	5.94778	22.1673	2.49895e-06	3.56199e-05	4.44831	NO	protein_coding
C1R	-1.9321	7.87648	22.1563	2.51332e-06	3.57584e-05	4.44662	DOWN	protein_coding
PSMC5	0.468058	5.77753	22.1391	2.53587e-06	3.60459e-05	4.44314	NO	protein_coding
ZNF426	-0.463779	4.93312	22.121	2.55997e-06	3.63548e-05	4.43944	NO	protein_coding
SSPN	-0.710547	4.32692	22.1137	2.56966e-06	3.64588e-05	4.4382	NO	protein_coding
BTG3	-0.603672	4.54637	22.0745	2.62277e-06	3.7178e-05	4.42971	NO	protein_coding
RPS4Y1	-0.436383	6.74278	22.069	2.63023e-06	3.72458e-05	4.42892	NO	protein_coding
DCUN1D4	-0.484318	5.61916	22.0674	2.63239e-06	3.72458e-05	4.42892	NO	protein_coding
TDP2	-0.577362	5.14678	22.0597	2.64296e-06	3.73609e-05	4.42758	NO	protein_coding
IQSEC3	-1.60129	0.473078	22.0311	2.68269e-06	3.78877e-05	4.4215	DOWN	protein_coding
SLX9	0.979375	2.61287	22.0144	2.70608e-06	3.81753e-05	4.41822	NO	protein_coding
MST1	-1.30535	2.1709	22.0131	2.70802e-06	3.81753e-05	4.41822	DOWN	protein_coding
ORC1	2.66535	1.77682	22.0033	2.7218e-06	3.83346e-05	4.41641	UP	protein_coding
EDNRA	-0.55639	4.32212	21.996	2.73214e-06	3.84449e-05	4.41516	NO	protein_coding
FEN1	1.70243	3.51623	21.9902	2.74052e-06	3.85276e-05	4.41423	UP	protein_coding
MFAP4	-1.61959	6.5611	21.986	2.74654e-06	3.85769e-05	4.41367	DOWN	protein_coding
ROR2	-2.39414	2.36976	21.9821	2.75206e-06	3.86192e-05	4.4132	DOWN	protein_coding
FAIM2	-1.75937	2.36828	21.9668	2.77412e-06	3.88934e-05	4.41012	DOWN	protein_coding
B3GALNT2	-0.471347	5.14931	21.9569	2.78842e-06	3.90581e-05	4.40829	NO	protein_coding
SDCBP	-0.571931	7.21591	21.9472	2.8026e-06	3.9221e-05	4.40648	NO	protein_coding
BRCA1	1.68236	3.78737	21.9367	2.81794e-06	3.93854e-05	4.40466	UP	protein_coding
HEBP1	-0.698871	5.42866	21.9357	2.81946e-06	3.93854e-05	4.40466	NO	protein_coding
SOX4	-2.05782	6.69145	21.9237	2.83703e-06	3.95948e-05	4.40236	DOWN	protein_coding
ST3GAL1	-0.932504	6.83924	21.9024	2.86878e-06	4.00017e-05	4.39792	NO	protein_coding
ERCC2	0.553514	6.23703	21.8978	2.87567e-06	4.00614e-05	4.39727	NO	protein_coding
GNG10	-0.49147	5.14342	21.896	2.87833e-06	4.00622e-05	4.39727	NO	protein_coding
SLFN11	-0.726032	5.07181	21.8858	2.8936e-06	4.02383e-05	4.39536	NO	protein_coding
DNAJC6	1.70962	1.07162	21.8703	2.91709e-06	4.04936e-05	4.39261	UP	protein_coding
RPS6KB2	0.374037	5.04702	21.8686	2.91968e-06	4.04936e-05	4.39261	NO	protein_coding
TMEFF2	1.08163	1.3553	21.8624	2.92921e-06	4.05867e-05	4.39162	UP	protein_coding
MIER3	-0.472765	4.60643	21.8444	2.95678e-06	4.09318e-05	4.38794	NO	protein_coding
PTK7	-0.838529	8.39493	21.8326	2.97496e-06	4.11464e-05	4.38567	NO	protein_coding
MARCKSL1	-0.981403	6.3198	21.8306	2.9781e-06	4.11529e-05	4.3856	NO	protein_coding
PFDN2	1.12781	2.80359	21.8277	2.98256e-06	4.11775e-05	4.38534	UP	protein_coding
H2BC8	1.50878	3.13533	21.8121	3.00693e-06	4.14767e-05	4.3822	UP	protein_coding
BMS1	0.524098	5.38919	21.8059	3.01677e-06	4.15752e-05	4.38117	NO	protein_coding
FOSL1	1.1513	6.75368	21.7971	3.03062e-06	4.17286e-05	4.37957	UP	protein_coding
HACE1	-0.43766	4.36434	21.7876	3.04562e-06	4.18977e-05	4.37781	NO	protein_coding
ANKRD52	0.619752	7.67505	21.7669	3.07867e-06	4.22687e-05	4.37398	NO	protein_coding
VCAM1	-4.43131	5.01334	21.7655	3.08083e-06	4.22687e-05	4.37398	DOWN	protein_coding
SH3GLB1	-0.429544	6.87825	21.7491	3.10737e-06	4.25568e-05	4.37103	NO	protein_coding
SF3A2	0.67947	5.42992	21.7411	3.12031e-06	4.2696e-05	4.36961	NO	protein_coding
PCMTD2	-0.605271	4.88835	21.7363	3.12815e-06	4.27653e-05	4.36891	NO	protein_coding
GINS4	1.22253	3.6754	21.7239	3.1485e-06	4.30053e-05	4.36648	UP	protein_coding
ADAM23	-0.581688	5.38244	21.7184	3.15749e-06	4.30898e-05	4.36563	NO	protein_coding
ZNF664	-0.498005	6.29294	21.701	3.1863e-06	4.34444e-05	4.36207	NO	protein_coding
NSD2	1.01536	6.83466	21.6929	3.19979e-06	4.35897e-05	4.36062	UP	protein_coding
IER3IP1	-0.550757	4.84875	21.6909	3.20309e-06	4.35961e-05	4.36055	NO	protein_coding
CIP2A	1.57876	3.91354	21.6715	3.23571e-06	4.40011e-05	4.35654	UP	protein_coding
RPS3	-0.481084	8.50098	21.668	3.24156e-06	4.40417e-05	4.35614	NO	protein_coding
AGAP1	-0.498634	5.3641	21.6623	3.25122e-06	4.41339e-05	4.35523	NO	protein_coding
XRCC2	2.15974	1.97609	21.6599	3.25528e-06	4.41501e-05	4.35507	UP	protein_coding
CAPZA2	-0.401915	6.48093	21.6451	3.28049e-06	4.44529e-05	4.3521	NO	protein_coding
NR2C1	-0.422994	4.30327	21.6219	3.32035e-06	4.49533e-05	4.34724	NO	protein_coding
HNRNPH3	0.632731	5.64816	21.5961	3.36538e-06	4.55229e-05	4.34177	NO	protein_coding
TNS3	-0.802044	8.91947	21.5865	3.38228e-06	4.57074e-05	4.34001	NO	protein_coding
DCUN1D1	-0.454077	5.75186	21.585	3.38497e-06	4.57074e-05	4.34001	NO	protein_coding
COL24A1	-0.831456	3.49962	21.5274	3.48808e-06	4.70585e-05	4.32736	NO	protein_coding
PLPP5	-0.521657	4.73009	21.4997	3.53881e-06	4.7701e-05	4.32147	NO	protein_coding
SYNE1	0.970069	8.04758	21.4914	3.55416e-06	4.7866e-05	4.31997	NO	protein_coding
MT1E	1.18997	6.40611	21.4815	3.57254e-06	4.80714e-05	4.31811	UP	protein_coding
PCGF3	-0.363105	5.8308	21.4784	3.57833e-06	4.81073e-05	4.31779	NO	protein_coding
PSMD2	0.789428	8.34613	21.4509	3.63009e-06	4.87605e-05	4.31193	NO	protein_coding
TMEM164	-0.58235	4.65349	21.4463	3.63871e-06	4.88337e-05	4.31128	NO	protein_coding
BTG2	-1.03799	5.27316	21.4433	3.64455e-06	4.88694e-05	4.31096	DOWN	protein_coding
RPL9	-0.455122	7.68154	21.4233	3.68268e-06	4.93359e-05	4.30684	NO	protein_coding
DOHH	0.875188	2.91615	21.4217	3.68576e-06	4.93359e-05	4.30684	NO	protein_coding
FTL	-0.803022	11.0803	21.3816	3.76376e-06	5.03361e-05	4.29812	NO	protein_coding
PLTP	-1.24012	5.95793	21.3499	3.82632e-06	5.11231e-05	4.29138	DOWN	protein_coding
SELENOH	0.504226	4.62378	21.3478	3.83066e-06	5.11231e-05	4.29138	NO	protein_coding
SUSD5	0.975421	3.46337	21.3468	3.83257e-06	5.11231e-05	4.29138	NO	protein_coding
TMEM230	-0.456929	6.11271	21.3188	3.88904e-06	5.18313e-05	4.28541	NO	protein_coding
SPG21	-0.478	5.39389	21.3099	3.9071e-06	5.20271e-05	4.28377	NO	protein_coding
ZNF652	-0.481384	5.28898	21.2778	3.97305e-06	5.28594e-05	4.27688	NO	protein_coding
ELP2	-0.398018	6.54198	21.2634	4.00311e-06	5.31105e-05	4.27482	NO	protein_coding
ORC6	1.71797	2.66147	21.2621	4.00574e-06	5.31105e-05	4.27482	UP	protein_coding
IFI27L1	0.961222	1.7274	21.2603	4.00945e-06	5.3114e-05	4.27479	NO	protein_coding
SEC23IP	-0.350017	6.55482	21.2552	4.02013e-06	5.32096e-05	4.27401	NO	protein_coding
VRK1	1.26383	3.6376	21.2504	4.03016e-06	5.32965e-05	4.2733	UP	protein_coding
NAB1	-0.515618	5.15878	21.2316	4.06997e-06	5.37458e-05	4.26966	NO	protein_coding
GTF2I	-0.389912	8.04904	21.2311	4.07112e-06	5.37458e-05	4.26966	NO	protein_coding
PTP4A2	-0.374209	7.98597	21.2281	4.07733e-06	5.37816e-05	4.26937	NO	protein_coding
LACC1	-0.739842	4.18988	21.2219	4.09058e-06	5.39101e-05	4.26833	NO	protein_coding
SLC41A2	-0.600359	3.35406	21.2066	4.12336e-06	5.42956e-05	4.26524	NO	protein_coding
PLXNA4	2.34481	0.872098	21.1996	4.13842e-06	5.44473e-05	4.26402	UP	protein_coding
USP5	0.550002	6.53027	21.1951	4.14833e-06	5.4531e-05	4.26336	NO	protein_coding
COL14A1	-3.88955	2.37834	21.1898	4.15967e-06	5.46335e-05	4.26254	DOWN	protein_coding
PSG5	1.1221	6.94016	21.1785	4.18431e-06	5.49102e-05	4.26035	UP	protein_coding
CACNB3	-0.604272	5.04247	21.1607	4.22331e-06	5.53747e-05	4.25669	NO	protein_coding
HSPBP1	0.529053	4.18539	21.1294	4.29285e-06	5.62385e-05	4.24997	NO	protein_coding
RIN1	0.602101	5.6564	21.1171	4.32049e-06	5.65524e-05	4.24755	NO	protein_coding
GLCE	-0.537151	6.13143	21.0956	4.3693e-06	5.71427e-05	4.24304	NO	protein_coding
MELK	1.54819	4.09687	21.0798	4.4055e-06	5.75672e-05	4.23983	UP	protein_coding
ALG3	0.633729	4.57123	21.0726	4.42207e-06	5.77347e-05	4.23856	NO	protein_coding
PROSER3	0.592228	4.63616	21.0613	4.44814e-06	5.80059e-05	4.23653	NO	protein_coding
CYB5R3	0.598289	8.16151	21.05	4.47452e-06	5.8271e-05	4.23455	NO	protein_coding
PPP1R2	-0.421169	5.34449	21.0472	4.48113e-06	5.83077e-05	4.23427	NO	protein_coding
BLID	1.60715	1.47736	21.0386	4.50117e-06	5.8478e-05	4.23301	UP	protein_coding
RHOBTB3	-1.06488	8.30153	21.0383	4.50182e-06	5.8478e-05	4.23301	DOWN	protein_coding
PLEKHH2	-1.2436	4.29821	21.035	4.50964e-06	5.85155e-05	4.23273	DOWN	protein_coding
TMEM160	1.25024	1.91529	21.0339	4.51231e-06	5.85155e-05	4.23273	UP	protein_coding
LRRC45	0.962435	2.71758	20.9798	4.64144e-06	6.01393e-05	4.22084	NO	protein_coding
PNPLA6	0.55625	6.70136	20.9781	4.64553e-06	6.01416e-05	4.22083	NO	protein_coding
MED16	0.488953	5.50556	20.972	4.66036e-06	6.02829e-05	4.21981	NO	protein_coding
KANSL3	-0.333637	5.69909	20.9444	4.72803e-06	6.11068e-05	4.21391	NO	protein_coding
SAYSD1	-0.639914	3.40401	20.932	4.75875e-06	6.14522e-05	4.21146	NO	protein_coding
KCNH2	-3.79639	0.039605	20.9255	4.77496e-06	6.16097e-05	4.21035	DOWN	protein_coding
FBXO32	-1.8425	5.00575	20.921	4.78615e-06	6.17024e-05	4.2097	DOWN	protein_coding
RAB42	-1.84966	0.0572959	20.909	4.81631e-06	6.19873e-05	4.2077	DOWN	protein_coding
KRT8	-0.793693	4.04225	20.8967	4.84732e-06	6.22595e-05	4.20579	NO	protein_coding
G3BP2	-0.389302	7.59104	20.8903	4.8636e-06	6.23871e-05	4.20491	NO	protein_coding
EI24	-0.413452	6.36069	20.8408	4.99091e-06	6.39669e-05	4.19404	NO	protein_coding
NT5E	0.83788	9.45695	20.8321	5.01344e-06	6.42021e-05	4.19245	NO	protein_coding
RBBP4	-0.506254	6.65475	20.8221	5.03984e-06	6.44864e-05	4.19053	NO	protein_coding
NIN	0.471221	7.01662	20.8131	5.06353e-06	6.46973e-05	4.18911	NO	protein_coding
DNAJB9	-0.600668	5.04876	20.8111	5.06894e-06	6.46973e-05	4.18911	NO	protein_coding
CSNK1A1	-0.347832	8.4385	20.7657	5.19032e-06	6.61168e-05	4.17969	NO	protein_coding
SH3BGRL	-0.540493	5.94043	20.765	5.19222e-06	6.61168e-05	4.17969	NO	protein_coding
RIPOR3	-1.70261	4.63894	20.7647	5.19305e-06	6.61168e-05	4.17969	DOWN	protein_coding
EIF1B	-0.563678	4.44229	20.7438	5.25007e-06	6.67322e-05	4.17566	NO	protein_coding
SLCO2B1	-4.04669	-0.282195	20.7398	5.2611e-06	6.68125e-05	4.17514	DOWN	protein_coding
EFEMP1	-0.85378	8.4268	20.7384	5.26507e-06	6.68125e-05	4.17514	NO	protein_coding
TRMT10C	-0.513118	3.87564	20.7271	5.29599e-06	6.71495e-05	4.17296	NO	protein_coding
FBXO21	-0.331134	5.3112	20.7237	5.30552e-06	6.72149e-05	4.17253	NO	protein_coding
RASL10B	-0.994649	3.19422	20.7097	5.34438e-06	6.76515e-05	4.16972	NO	protein_coding
STIL	1.56951	3.8905	20.6915	5.3956e-06	6.82437e-05	4.16594	UP	protein_coding
KLF9	-1.12151	4.59802	20.6658	5.46828e-06	6.91061e-05	4.16048	DOWN	protein_coding
TRIM47	-1.1139	3.23905	20.621	5.59779e-06	7.06847e-05	4.15067	DOWN	protein_coding
H2BC10	2.13118	3.14132	20.6056	5.64321e-06	7.11998e-05	4.14752	UP	protein_coding
CIB2	-1.26638	0.264628	20.5694	5.75094e-06	7.24996e-05	4.13966	DOWN	protein_coding
RPL32	-0.44999	8.13091	20.5677	5.75589e-06	7.25025e-05	4.13965	NO	protein_coding
NFYC	0.403962	4.29402	20.5597	5.77988e-06	7.27451e-05	4.1382	NO	protein_coding
ALYREF	0.763314	4.46991	20.5556	5.79249e-06	7.28442e-05	4.13761	NO	protein_coding
IGFBP2	-2.27383	3.7334	20.5419	5.83398e-06	7.3306e-05	4.13486	DOWN	protein_coding
FMN2	0.7782	6.35783	20.5368	5.84972e-06	7.34165e-05	4.13421	NO	protein_coding
MCM10	2.58464	2.61433	20.5359	5.85232e-06	7.34165e-05	4.13421	UP	protein_coding
CHCHD1	0.827726	2.50414	20.5144	5.91836e-06	7.41844e-05	4.12969	NO	protein_coding
CAB39L	-0.564203	3.62777	20.5105	5.93059e-06	7.42754e-05	4.12916	NO	protein_coding
MCM3	1.24264	4.53464	20.509	5.93527e-06	7.42754e-05	4.12916	UP	protein_coding
TYMS	1.20525	5.08842	20.5069	5.94171e-06	7.42956e-05	4.12904	UP	protein_coding
RAB33B	-0.563844	3.61722	20.4987	5.96727e-06	7.45282e-05	4.12768	NO	protein_coding
ELOVL1	0.622604	6.30105	20.4978	5.97001e-06	7.45282e-05	4.12768	NO	protein_coding
CCDC150	1.89498	1.32628	20.459	6.09221e-06	7.59921e-05	4.11923	UP	protein_coding
KLF3	-0.607161	5.99375	20.4449	6.13744e-06	7.64942e-05	4.11637	NO	protein_coding
MIPEP	-0.501767	4.23906	20.4321	6.17838e-06	7.6942e-05	4.11384	NO	protein_coding
KLHL7	-0.451909	4.81318	20.4193	6.22007e-06	7.73986e-05	4.11127	NO	protein_coding
PPA1	-0.387872	5.87503	20.4082	6.25608e-06	7.77838e-05	4.10911	NO	protein_coding
SCARB2	-0.417742	8.05913	20.4031	6.27284e-06	7.79291e-05	4.1083	NO	protein_coding
ODC1	0.971495	6.16975	20.391	6.31247e-06	7.83063e-05	4.1062	NO	protein_coding
H2AJ	0.7617	3.84033	20.3908	6.31338e-06	7.83063e-05	4.1062	NO	protein_coding
ACOT7	0.494329	5.53705	20.3776	6.35694e-06	7.87831e-05	4.10357	NO	protein_coding
ANKRD11	0.341504	7.77874	20.3751	6.36515e-06	7.88041e-05	4.10345	NO	protein_coding
OGDH	0.563559	6.67136	20.374	6.36889e-06	7.88041e-05	4.10345	NO	protein_coding
DEPP1	-1.71394	4.41769	20.3695	6.38377e-06	7.8885e-05	4.10301	DOWN	protein_coding
GADD45A	0.559199	5.19095	20.369	6.38568e-06	7.8885e-05	4.10301	NO	protein_coding
H1.2	1.10444	5.63879	20.3672	6.39163e-06	7.88951e-05	4.10295	UP	protein_coding
IFNAR1	-0.46662	6.24755	20.3464	6.4616e-06	7.9631e-05	4.09892	NO	protein_coding
BOLA3	0.615821	3.1099	20.3436	6.47092e-06	7.96819e-05	4.09864	NO	protein_coding
UCP2	1.15623	2.9851	20.3328	6.50763e-06	8.00699e-05	4.09653	UP	protein_coding
SIRT1	-0.697997	4.38721	20.3236	6.53884e-06	8.03896e-05	4.0948	NO	protein_coding
SHMT1	1.1384	2.17028	20.3021	6.61283e-06	8.12343e-05	4.09026	UP	protein_coding
TNFSF15	-4.51956	2.51555	20.2987	6.62466e-06	8.12631e-05	4.09011	DOWN	protein_coding
SETX	-0.33812	7.3521	20.2984	6.62574e-06	8.12631e-05	4.09011	NO	protein_coding
TRPA1	-2.24063	7.20635	20.294	6.6409e-06	8.13841e-05	4.08946	DOWN	protein_coding
TGFBR1	-1.27601	6.46903	20.2759	6.70403e-06	8.20924e-05	4.0857	DOWN	protein_coding
NMD3	-0.333944	5.86665	20.2659	6.739e-06	8.24549e-05	4.08378	NO	protein_coding
GPNMB	-1.2909	5.00382	20.2482	6.80183e-06	8.30255e-05	4.08079	DOWN	protein_coding
AMOTL1	-0.45687	7.58181	20.2334	6.8546e-06	8.36033e-05	4.07778	NO	protein_coding
ACAT2	1.04155	4.50658	20.2311	6.86283e-06	8.36373e-05	4.0776	UP	protein_coding
RRM1	0.951653	6.11069	20.2227	6.89306e-06	8.39393e-05	4.07603	NO	protein_coding
RAP2C	-0.418801	5.50625	20.2194	6.90479e-06	8.39622e-05	4.07592	NO	protein_coding
DAPK2	-1.63623	-0.446073	20.2191	6.90587e-06	8.39622e-05	4.07592	DOWN	protein_coding
MGAT5	-0.525572	7.6851	20.1813	7.04384e-06	8.5572e-05	4.06767	NO	protein_coding
EIF5A2	-0.548951	5.23125	20.1477	7.16872e-06	8.70204e-05	4.06038	NO	protein_coding
SRGAP1	0.436504	7.73233	20.1444	7.18117e-06	8.71029e-05	4.05997	NO	protein_coding
RNF152	-0.541707	5.64955	20.1328	7.22478e-06	8.75627e-05	4.05768	NO	protein_coding
GUCY1A1	-4.30824	1.59599	20.1235	7.26007e-06	8.79211e-05	4.05591	DOWN	protein_coding
SMAD1	-1.35628	4.03305	20.1169	7.285e-06	8.81536e-05	4.05476	DOWN	protein_coding
DSTN	-0.418367	7.65554	20.0908	7.38517e-06	8.92956e-05	4.04917	NO	protein_coding
EBNA1BP2	0.652375	4.77636	20.0836	7.4131e-06	8.95628e-05	4.04787	NO	protein_coding
PPP2R5A	-0.467648	4.90604	20.0815	7.42114e-06	8.95896e-05	4.04774	NO	protein_coding
PPP1R15A	0.651396	6.88405	20.0771	7.43821e-06	8.97252e-05	4.04709	NO	protein_coding
STX16	-0.332883	6.73216	20.0648	7.48618e-06	9.02331e-05	4.04463	NO	protein_coding
ENSG00000286264	1.35044	1.15404	20.0553	7.52359e-06	9.06131e-05	4.04281	UP	protein_coding
BORCS5	-0.598641	3.56795	20.0495	7.54634e-06	9.08159e-05	4.04184	NO	protein_coding
SPRED1	-0.363545	6.56985	20.0423	7.57476e-06	9.10866e-05	4.04055	NO	protein_coding
BDKRB2	-1.65803	6.74831	20.0392	7.58694e-06	9.11618e-05	4.04019	DOWN	protein_coding
LAMB1	-0.843584	9.12916	20.0351	7.60323e-06	9.12208e-05	4.03991	NO	protein_coding
RLF	-0.475464	5.13559	20.035	7.60371e-06	9.12208e-05	4.03991	NO	protein_coding
ACP2	0.528878	4.96809	20.0261	7.63912e-06	9.15742e-05	4.03823	NO	protein_coding
CSNK1G3	-0.440539	5.44884	20.0049	7.72435e-06	9.25238e-05	4.03375	NO	protein_coding
SRPX2	-0.766333	6.46048	19.9876	7.79452e-06	9.32916e-05	4.03016	NO	protein_coding
RPUSD3	0.405912	4.08138	19.9771	7.83755e-06	9.37337e-05	4.0281	NO	protein_coding
ESCO2	2.57155	1.97515	19.9742	7.84932e-06	9.38016e-05	4.02779	UP	protein_coding
SPHK2	0.467334	4.22119	19.9434	7.97692e-06	9.52523e-05	4.02112	NO	protein_coding
C19orf53	0.977577	4.09155	19.9414	7.98537e-06	9.52792e-05	4.021	NO	protein_coding
MEF2A	-0.4787	6.0733	19.9097	8.11878e-06	9.6796e-05	4.01414	NO	protein_coding
CABLES1	-0.988617	4.34843	19.902	8.15149e-06	9.71107e-05	4.01273	NO	protein_coding
CLEC11A	0.819483	6.52275	19.8933	8.18851e-06	9.74762e-05	4.0111	NO	protein_coding
CRIM1	0.498586	9.86369	19.891	8.19845e-06	9.75191e-05	4.01091	NO	protein_coding
H2BC5	1.29441	3.82168	19.8738	8.27269e-06	9.82236e-05	4.00778	UP	protein_coding
SERPINB9	-0.985319	3.08556	19.8734	8.27435e-06	9.82236e-05	4.00778	NO	protein_coding
DR1	-0.356371	6.47168	19.8728	8.27684e-06	9.82236e-05	4.00778	NO	protein_coding
TGIF2	-0.557936	3.76483	19.8703	8.28797e-06	9.82799e-05	4.00754	NO	protein_coding
C5orf22	-0.479413	4.65137	19.8503	8.37492e-06	9.92344e-05	4.00334	NO	protein_coding
ULBP2	1.05196	2.60088	19.8337	8.44792e-06	0.000100022	3.9999	UP	protein_coding
EIF4E3	-0.82734	2.40502	19.8254	8.48497e-06	0.000100327	3.99858	NO	protein_coding
GLIPR2	-1.03583	5.02415	19.825	8.48673e-06	0.000100327	3.99858	DOWN	protein_coding
GOLIM4	0.575626	6.69057	19.7886	8.64975e-06	0.000102098	3.99098	NO	protein_coding
NDUFB5	-0.412549	4.88936	19.7585	8.78719e-06	0.00010364	3.98447	NO	protein_coding
RALGPS1	-1.05991	1.40197	19.7393	8.87556e-06	0.000104602	3.98046	DOWN	protein_coding
UBE2B	-0.425718	5.00738	19.7319	8.91023e-06	0.000104931	3.9791	NO	protein_coding
SLC6A17	1.84116	2.11016	19.7127	9.00012e-06	0.000105908	3.97507	UP	protein_coding
GSR	-0.58248	6.15954	19.7095	9.01506e-06	0.000106003	3.97468	NO	protein_coding
NPTX1	3.29458	7.47025	19.7081	9.02199e-06	0.000106003	3.97468	UP	protein_coding
PPP1CB	-0.508628	7.91674	19.7034	9.04405e-06	0.000106181	3.97395	NO	protein_coding
FBRS	0.39508	6.52029	19.6906	9.10474e-06	0.000106812	3.97138	NO	protein_coding
CDC42SE2	-0.456478	4.96067	19.688	9.11738e-06	0.000106879	3.97111	NO	protein_coding
H4C3	1.57053	3.70481	19.6743	9.18288e-06	0.000107483	3.96866	UP	protein_coding
DTYMK	0.906154	3.63453	19.6539	9.2816e-06	0.000108556	3.96435	NO	protein_coding
LIG1	1.19332	4.27002	19.6437	9.33087e-06	0.000109049	3.96238	UP	protein_coding
RIC1	-0.404676	6.60953	19.6421	9.33909e-06	0.000109062	3.96233	NO	protein_coding
DEPDC1B	2.03348	1.44758	19.6403	9.34775e-06	0.000109081	3.96225	UP	protein_coding
ABCD3	-0.428126	5.9887	19.6378	9.35998e-06	0.000109141	3.96201	NO	protein_coding
LRRFIP2	0.421194	5.55796	19.6219	9.43809e-06	0.000109968	3.95873	NO	protein_coding
PNRC1	-1.08606	6.43186	19.6028	9.53279e-06	0.000110987	3.95473	DOWN	protein_coding
GINS1	1.59527	2.94159	19.5873	9.61079e-06	0.000111807	3.95153	UP	protein_coding
H4C12	1.39689	5.65901	19.5844	9.62501e-06	0.000111807	3.95153	UP	protein_coding
ECT2	0.974796	5.47682	19.5783	9.65598e-06	0.000112082	3.95046	NO	protein_coding
CPE	-0.959829	3.05846	19.5448	9.82672e-06	0.000113978	3.94318	NO	protein_coding
MOB3C	-0.629467	3.76345	19.5391	9.85615e-06	0.000114233	3.94221	NO	protein_coding
THSD4	-0.92119	8.1948	19.5295	9.90605e-06	0.000114725	3.94034	NO	protein_coding
CFAP299	0.964182	1.01451	19.5248	9.92997e-06	0.000114916	3.93962	NO	protein_coding
MT.CYB	0.976787	9.87108	19.5203	9.95383e-06	0.000115105	3.93891	NO	protein_coding
SPATA13	-0.799215	5.9621	19.5153	9.97987e-06	0.00011532	3.9381	NO	protein_coding
OSTC	-0.434507	6.36301	19.5058	1.00294e-05	0.000115805	3.93627	NO	protein_coding
POLE2	1.64257	1.1956	19.4786	1.01731e-05	0.000117376	3.93042	UP	protein_coding
PGD	-0.635718	8.12242	19.4524	1.03137e-05	0.000118909	3.92479	NO	protein_coding
CPZ	-2.48541	3.00905	19.4291	1.04401e-05	0.000120277	3.91982	DOWN	protein_coding
FRK	-1.58324	-0.0659694	19.4147	1.05193e-05	0.000121098	3.91686	DOWN	protein_coding
POLE	1.19846	5.00232	19.3987	1.06077e-05	0.000122025	3.91355	UP	protein_coding
ATXN2L	0.458728	7.43185	19.394	1.06341e-05	0.000122236	3.9128	NO	protein_coding
DDX54	0.53492	5.69491	19.3657	1.07925e-05	0.000123873	3.90702	NO	protein_coding
PIGO	0.445815	4.6387	19.3625	1.08111e-05	0.000123993	3.9066	NO	protein_coding
CACNA1G	-1.84794	0.423847	19.3535	1.08619e-05	0.000124483	3.90489	DOWN	protein_coding
TMED2	-0.453296	8.14001	19.3509	1.08766e-05	0.000124559	3.90462	NO	protein_coding
MRPL20	0.499419	4.00511	19.3461	1.09043e-05	0.000124783	3.90385	NO	protein_coding
LENG1	1.2326	0.618952	19.3371	1.09557e-05	0.000125185	3.90245	UP	protein_coding
EIF5A	0.472417	8.5805	19.3077	1.11254e-05	0.00012703	3.89609	NO	protein_coding
KCNK1	-0.724487	1.71545	19.3042	1.11459e-05	0.000127169	3.89562	NO	protein_coding
GOLPH3	-0.447069	6.35964	19.2966	1.11907e-05	0.000127586	3.8942	NO	protein_coding
ENSG00000285043	0.849593	3.07536	19.2895	1.12322e-05	0.000127964	3.89291	NO	protein_coding
FAM3A	0.458015	4.60151	19.2725	1.13326e-05	0.000129013	3.88937	NO	protein_coding
TTC28	-0.6198	6.43345	19.2705	1.13444e-05	0.000129051	3.88924	NO	protein_coding
MAP4K3	-0.580235	6.21086	19.2508	1.14625e-05	0.000130202	3.88538	NO	protein_coding
MPHOSPH6	-0.552578	3.97071	19.2239	1.1625e-05	0.00013195	3.87959	NO	protein_coding
IER5	0.490313	6.05787	19.2213	1.16407e-05	0.000132031	3.87932	NO	protein_coding
ZNF564	-0.640906	2.93684	19.2198	1.16501e-05	0.00013204	3.87929	NO	protein_coding
RPL17.C18orf32	-0.746357	4.11945	19.2123	1.16959e-05	0.000132461	3.87791	NO	protein_coding
TMEM52B	-1.48469	1.75857	19.182	1.18828e-05	0.000134426	3.87152	DOWN	protein_coding
CDC37	0.530032	7.21492	19.1814	1.18868e-05	0.000134426	3.87152	NO	protein_coding
POLD1	1.06609	3.93582	19.1677	1.19719e-05	0.000135289	3.86874	UP	protein_coding
BABAM1	0.435096	5.21396	19.1538	1.20596e-05	0.000136179	3.86589	NO	protein_coding
NAGA	0.356952	5.23409	19.1456	1.21114e-05	0.000136664	3.86434	NO	protein_coding
GPR137B	-0.684626	4.2998	19.1314	1.22018e-05	0.000137566	3.86149	NO	protein_coding
ZFAND6	-0.449899	5.20137	19.1303	1.22092e-05	0.000137566	3.86149	NO	protein_coding
STAT2	-0.661416	7.64538	19.1222	1.22611e-05	0.00013805	3.85996	NO	protein_coding
ZC3H18	0.40719	5.5457	19.1142	1.23125e-05	0.000138526	3.85847	NO	protein_coding
NUDT4	-0.357406	6.90362	19.0631	1.2647e-05	0.000142186	3.84714	NO	protein_coding
SDF2L1	0.886073	3.01359	19.0463	1.27586e-05	0.000143178	3.84412	NO	protein_coding
CDC14A	-0.912737	2.05407	19.0456	1.27631e-05	0.000143178	3.84412	NO	protein_coding
TP53RK	-0.439513	4.22505	19.0438	1.27753e-05	0.000143211	3.84403	NO	protein_coding
AOX1	0.76327	5.51661	19.0318	1.28561e-05	0.000144011	3.8416	NO	protein_coding
C1QL1	-1.95928	0.510558	19.0214	1.29259e-05	0.000144688	3.83957	DOWN	protein_coding
SMC3	0.595292	5.59654	19.0165	1.29594e-05	0.000144957	3.83876	NO	protein_coding
MBNL2	-0.449762	6.63536	19.0033	1.30492e-05	0.000145856	3.83608	NO	protein_coding
SH3RF3	-0.430316	5.45169	18.9972	1.30908e-05	0.000146111	3.83532	NO	protein_coding
SCN2A	-1.13253	2.41053	18.9972	1.3091e-05	0.000146111	3.83532	DOWN	protein_coding
NID1	-0.692308	7.64892	18.977	1.32305e-05	0.000147559	3.83103	NO	protein_coding
SPDL1	1.29409	4.52365	18.9608	1.33432e-05	0.000148709	3.82766	UP	protein_coding
HSPB7	0.858765	3.75438	18.9414	1.34796e-05	0.000150031	3.82382	NO	protein_coding
ETV6	-0.698955	5.06719	18.9411	1.34814e-05	0.000150031	3.82382	NO	protein_coding
IFT52	-0.467327	3.94948	18.9323	1.35441e-05	0.000150539	3.82235	NO	protein_coding
MIS18BP1	1.08056	4.23443	18.9319	1.35465e-05	0.000150539	3.82235	UP	protein_coding
LRRC32	-0.961896	4.60504	18.9213	1.36221e-05	0.00015127	3.82025	NO	protein_coding
UCHL1	-0.485072	8.16026	18.9171	1.36523e-05	0.000151495	3.8196	NO	protein_coding
GRAMD1C	-0.661089	2.57582	18.9127	1.36838e-05	0.000151735	3.81891	NO	protein_coding
LYNX1	-0.832247	3.94811	18.9076	1.37204e-05	0.000152032	3.81807	NO	protein_coding
MT.ND4L	0.804699	6.24576	18.9024	1.37583e-05	0.000152342	3.81718	NO	protein_coding
ARPC1B	0.56651	6.57419	18.8933	1.38238e-05	0.000152957	3.81543	NO	protein_coding
MAP3K14	-0.84471	3.98697	18.8795	1.39241e-05	0.000153956	3.8126	NO	protein_coding
TPR	0.364481	7.12286	18.8624	1.40494e-05	0.000155119	3.80934	NO	protein_coding
TRIM5	-0.620217	5.74525	18.8605	1.40634e-05	0.000155161	3.80922	NO	protein_coding
ADAMTS9	-2.0129	2.3153	18.8463	1.41684e-05	0.000156208	3.8063	DOWN	protein_coding
ELL2	-0.445116	8.29687	18.8097	1.44433e-05	0.000159124	3.79826	NO	protein_coding
UBE2J1	-0.447814	5.95784	18.8077	1.44583e-05	0.000159175	3.79812	NO	protein_coding
RNF130	-0.503064	3.82048	18.7918	1.45789e-05	0.000160389	3.79483	NO	protein_coding
VPS41	-0.427941	6.03112	18.789	1.46004e-05	0.000160511	3.7945	NO	protein_coding
PRKG1	-0.535813	6.08337	18.7785	1.46815e-05	0.000161172	3.79271	NO	protein_coding
BPGM	-0.459071	4.13375	18.7714	1.47358e-05	0.000161591	3.79158	NO	protein_coding
E2F7	1.48083	5.32374	18.7708	1.47407e-05	0.000161591	3.79158	UP	protein_coding
MELTF	-1.8693	0.335944	18.7651	1.47852e-05	0.000161963	3.79058	DOWN	protein_coding
CCDC22	0.699221	3.25912	18.7632	1.47994e-05	0.000162003	3.79048	NO	protein_coding
EPHX1	-0.677388	5.5182	18.7619	1.48099e-05	0.000162003	3.79048	NO	protein_coding
SUDS3	-0.315197	5.69735	18.7341	1.50273e-05	0.000164264	3.78446	NO	protein_coding
PSAP	-0.656287	9.49036	18.7255	1.50949e-05	0.000164886	3.78282	NO	protein_coding
HNRNPA2B1	0.543468	8.18127	18.7125	1.51982e-05	0.000165897	3.78016	NO	protein_coding
COPZ1	-0.363074	6.45377	18.7018	1.52837e-05	0.000166711	3.77803	NO	protein_coding
EP400	0.424101	7.27397	18.6889	1.53874e-05	0.000167724	3.7754	NO	protein_coding
CDC6	1.90356	3.19582	18.6854	1.5416e-05	0.000167916	3.77491	UP	protein_coding
RAB11A	-0.359449	6.62857	18.6825	1.54393e-05	0.000168051	3.77456	NO	protein_coding
VAT1L	-1.67649	4.86299	18.6731	1.55155e-05	0.000168761	3.77273	DOWN	protein_coding
HS2ST1	-0.474888	5.96972	18.6657	1.55763e-05	0.000169302	3.77134	NO	protein_coding
CMSS1	1.00655	2.37841	18.6614	1.56108e-05	0.000169558	3.77068	UP	protein_coding
PIF1	1.01684	2.80384	18.6436	1.57572e-05	0.000170906	3.76724	UP	protein_coding
AUNIP	1.85565	0.712202	18.636	1.58201e-05	0.000171468	3.76582	UP	protein_coding
EEFSEC	0.62461	2.80464	18.6145	1.60003e-05	0.000173299	3.7612	NO	protein_coding
SAP30BP	0.41744	5.23319	18.5988	1.61326e-05	0.000174392	3.75847	NO	protein_coding
SART1	0.689738	5.01925	18.5984	1.61352e-05	0.000174392	3.75847	NO	protein_coding
CADM4	-0.976258	2.08724	18.597	1.61472e-05	0.000174399	3.75846	NO	protein_coding
RAB5A	-0.424925	5.83713	18.5947	1.61667e-05	0.000174487	3.75824	NO	protein_coding
AP3S2	-0.44472	4.94594	18.5875	1.62285e-05	0.000175031	3.75688	NO	protein_coding
ATF6B	0.425306	6.20261	18.5792	1.62989e-05	0.000175667	3.75531	NO	protein_coding
RPS6KC1	-0.347241	5.55858	18.5725	1.63562e-05	0.000176161	3.75409	NO	protein_coding
SLC9A1	0.339296	6.85021	18.554	1.65156e-05	0.000177753	3.75018	NO	protein_coding
ENOX1	-1.16281	1.94561	18.5518	1.65347e-05	0.000177835	3.74998	DOWN	protein_coding
H4C14	3.79448	3.99927	18.5495	1.65547e-05	0.000177925	3.74976	UP	protein_coding
SF3B4	0.612791	5.70745	18.5423	1.66173e-05	0.000178473	3.74843	NO	protein_coding
XPR1	-0.396649	6.67934	18.5322	1.67057e-05	0.000179298	3.74643	NO	protein_coding
TEDC2	1.38184	1.22064	18.5268	1.67533e-05	0.000179683	3.74549	UP	protein_coding
HROB	1.5273	1.81474	18.5214	1.68003e-05	0.00018	3.74473	UP	protein_coding
CCHCR1	0.469445	3.69087	18.5208	1.68062e-05	0.00018	3.74473	NO	protein_coding
C16orf87	-0.530182	4.13196	18.5142	1.68643e-05	0.000180496	3.74353	NO	protein_coding
COL17A1	2.10833	-0.486324	18.5037	1.69578e-05	0.000181371	3.74143	UP	protein_coding
FKBP14	-0.444498	6.54184	18.499	1.69994e-05	0.000181599	3.74089	NO	protein_coding
DYM	-0.410637	5.13788	18.4986	1.70027e-05	0.000181599	3.74089	NO	protein_coding
MRPL12	0.678189	4.42927	18.4727	1.72352e-05	0.000183954	3.73529	NO	protein_coding
MMP11	-1.23201	2.54214	18.446	1.74791e-05	0.000186428	3.72949	DOWN	protein_coding
TRAF3	-0.35315	5.99742	18.4394	1.75389e-05	0.000186936	3.72831	NO	protein_coding
RPL23	-0.432518	8.30939	18.4359	1.75719e-05	0.000187158	3.72779	NO	protein_coding
ATP5MF	0.576896	5.53862	18.4291	1.76346e-05	0.000187696	3.72655	NO	protein_coding
AHNAK2	0.828954	7.33325	18.423	1.76913e-05	0.000188169	3.72545	NO	protein_coding
YWHAH	0.523676	6.22709	18.4197	1.77213e-05	0.000188357	3.72502	NO	protein_coding
NCAPD3	1.02552	4.76224	18.4143	1.77723e-05	0.000188769	3.72407	UP	protein_coding
POM121	0.487701	6.55099	18.4085	1.7826e-05	0.000189209	3.72306	NO	protein_coding
RAD23A	0.39577	6.15782	18.4067	1.78429e-05	0.000189258	3.72295	NO	protein_coding
NGF	1.60875	1.17907	18.3919	1.79824e-05	0.000190606	3.71986	UP	protein_coding
VCL	-0.396212	10.0063	18.3869	1.80297e-05	0.000190975	3.71902	NO	protein_coding
ERAP1	-0.537614	5.97529	18.3738	1.81535e-05	0.000192155	3.71635	NO	protein_coding
TLCD4	-1.39973	2.18263	18.3664	1.82241e-05	0.000192769	3.71496	DOWN	protein_coding
DTX2	0.720135	3.67899	18.362	1.82666e-05	0.000193069	3.71429	NO	protein_coding
MMADHC	-0.413614	6.07342	18.3607	1.82788e-05	0.000193069	3.71429	NO	protein_coding
PPP1CA	0.456021	5.8687	18.3546	1.83379e-05	0.00019344	3.71345	NO	protein_coding
SCN7A	-3.0314	2.84593	18.3515	1.83678e-05	0.000193623	3.71304	DOWN	protein_coding
GOLGA7	-0.383295	5.25792	18.3448	1.84324e-05	0.000194171	3.71182	NO	protein_coding
FYTTD1	-0.414867	6.30625	18.3401	1.84778e-05	0.000194394	3.71132	NO	protein_coding
UMAD1	-0.644538	2.71605	18.34	1.84788e-05	0.000194394	3.71132	NO	protein_coding
PTPN23	0.556242	6.49094	18.3316	1.85603e-05	0.000195118	3.7097	NO	protein_coding
C1orf52	-0.429295	3.79629	18.3299	1.85764e-05	0.000195154	3.70962	NO	protein_coding
PRIM1	1.66104	1.2409	18.3175	1.86983e-05	0.0001963	3.70708	UP	protein_coding
EEIG2	-0.445042	4.01114	18.3156	1.87171e-05	0.000196364	3.70694	NO	protein_coding
RHEB	-0.395533	5.89403	18.2961	1.89094e-05	0.000198245	3.7028	NO	protein_coding
SNRPB	0.633343	5.73603	18.2917	1.89529e-05	0.000198567	3.70209	NO	protein_coding
GFPT2	-0.680072	4.03524	18.2844	1.90262e-05	0.000198914	3.70133	NO	protein_coding
ENTPD6	0.52478	5.6488	18.2834	1.90362e-05	0.000198914	3.70133	NO	protein_coding
WDR26	-0.375807	8.07952	18.2832	1.90378e-05	0.000198914	3.70133	NO	protein_coding
GABBR2	1.20759	3.58985	18.277	1.91004e-05	0.000199432	3.70021	UP	protein_coding
EML2	0.562943	4.47915	18.2715	1.91556e-05	0.000199873	3.69925	NO	protein_coding
ZWILCH	0.989587	4.24007	18.269	1.91807e-05	0.0002	3.69897	NO	protein_coding
ABCC1	-0.643261	8.45082	18.2533	1.93392e-05	0.000201515	3.69569	NO	protein_coding
ZNF555	-0.600784	3.02151	18.2483	1.93899e-05	0.00020177	3.69514	NO	protein_coding
LMAN2	0.439849	6.8184	18.2419	1.94549e-05	0.00020231	3.69398	NO	protein_coding
PDLIM3	-1.57759	2.21022	18.2126	1.9757e-05	0.000205313	3.68758	DOWN	protein_coding
EEF1A1	-0.453583	12.7617	18.2017	1.98705e-05	0.000206214	3.68568	NO	protein_coding
LIFR	-0.762384	6.18183	18.1973	1.99164e-05	0.000206551	3.68497	NO	protein_coding
SRD5A1	-0.412649	4.76124	18.1826	2.00701e-05	0.000208003	3.68193	NO	protein_coding
DGCR6	1.10579	0.91272	18.1814	2.00835e-05	0.000208003	3.68193	UP	protein_coding
CCNY	-0.374589	5.96933	18.1615	2.02945e-05	0.000210047	3.67768	NO	protein_coding
MIB1	-0.37907	6.80112	18.1588	2.03228e-05	0.000210198	3.67737	NO	protein_coding
DPH3	-0.435505	5.28042	18.145	2.04708e-05	0.000211587	3.67451	NO	protein_coding
GRAMD1B	1.04053	4.62784	18.1223	2.07166e-05	0.000213983	3.66962	UP	protein_coding
PRKACB	-0.474517	5.76891	18.1121	2.08274e-05	0.000214983	3.6676	NO	protein_coding
PMP22	-1.00545	5.74668	18.097	2.09934e-05	0.000216552	3.66444	DOWN	protein_coding
TIMM13	0.527049	4.19609	18.0869	2.11044e-05	0.000217263	3.66301	NO	protein_coding
ENSG00000271793	4.32383	0.594658	18.0859	2.11154e-05	0.000217263	3.66301	UP	protein_coding
TNFRSF12A	0.927314	6.76909	18.0856	2.11189e-05	0.000217263	3.66301	NO	protein_coding
LUM	-1.38172	7.7399	18.0789	2.11942e-05	0.000217696	3.66215	DOWN	protein_coding
FAM89A	-0.750961	1.88916	18.078	2.12034e-05	0.000217696	3.66215	NO	protein_coding
PRRC2A	0.419245	8.71463	18.0579	2.14285e-05	0.00021986	3.65785	NO	protein_coding
SNN	-0.655257	4.18649	18.0465	2.15571e-05	0.000221032	3.65555	NO	protein_coding
ZNRF1	-0.484355	5.12813	18.0414	2.16158e-05	0.000221487	3.65465	NO	protein_coding
NRSN2	0.430575	5.42718	18.0375	2.16596e-05	0.000221788	3.65406	NO	protein_coding
ANGPT1	-0.679247	6.42922	18.0235	2.1819e-05	0.000223271	3.65117	NO	protein_coding
DRAM2	-0.549558	4.40869	18.0216	2.18409e-05	0.000223279	3.65115	NO	protein_coding
CCNG2	-0.951276	5.43277	18.0209	2.18488e-05	0.000223279	3.65115	NO	protein_coding
SGO2	1.50762	4.35162	18.0075	2.20038e-05	0.000224714	3.64837	UP	protein_coding
SURF2	0.916731	1.18787	17.996	2.21368e-05	0.000225921	3.64604	NO	protein_coding
CAVIN1	0.64772	10.2461	17.9805	2.23177e-05	0.000227617	3.6428	NO	protein_coding
SCP2	-0.482731	6.36389	17.9717	2.24217e-05	0.000228526	3.64106	NO	protein_coding
FBXO5	1.64871	3.33629	17.9629	2.25251e-05	0.000229428	3.63935	UP	protein_coding
DDRGK1	0.702142	4.05783	17.956	2.26073e-05	0.000230113	3.63806	NO	protein_coding
TMEM248	-0.339287	7.07929	17.9452	2.27361e-05	0.000231271	3.63588	NO	protein_coding
IL34	-3.24136	0.702719	17.9422	2.2772e-05	0.000231483	3.63548	DOWN	protein_coding
RPL27	0.990851	5.83253	17.9318	2.28966e-05	0.000232595	3.6334	NO	protein_coding
SASH1	-0.440382	6.87521	17.9243	2.29868e-05	0.000233358	3.63198	NO	protein_coding
SDK1	-1.16696	4.15348	17.9189	2.30519e-05	0.000233864	3.63104	DOWN	protein_coding
ATXN1	-0.569139	5.8541	17.9046	2.32265e-05	0.00023548	3.62805	NO	protein_coding
CKS2	1.10578	3.10281	17.8839	2.34798e-05	0.000237892	3.62362	UP	protein_coding
ADAM10	-0.506956	8.40592	17.8757	2.3581e-05	0.000238759	3.62204	NO	protein_coding
SRGAP2C	-0.347845	5.53005	17.8649	2.37161e-05	0.000239969	3.61984	NO	protein_coding
CWC27	0.475315	4.40077	17.8435	2.39834e-05	0.000242515	3.61526	NO	protein_coding
NDUFA6	0.610708	4.46382	17.8327	2.41203e-05	0.000243738	3.61308	NO	protein_coding
AATF	0.523704	4.67786	17.8181	2.43058e-05	0.000245452	3.61003	NO	protein_coding
SLC25A15	-0.719377	2.75987	17.8114	2.43919e-05	0.00024616	3.60878	NO	protein_coding
UNC119B	-0.412051	5.42018	17.8088	2.44256e-05	0.000246338	3.60847	NO	protein_coding
CKAP5	0.361575	7.568	17.8068	2.44506e-05	0.000246429	3.60831	NO	protein_coding
PIAS2	-0.394667	5.30009	17.7975	2.45706e-05	0.000247476	3.60647	NO	protein_coding
PRPF31	0.414791	4.87227	17.7938	2.4619e-05	0.000247754	3.60598	NO	protein_coding
SLC2A4RG	0.627648	5.82078	17.7928	2.46319e-05	0.000247754	3.60598	NO	protein_coding
TRIM38	-0.557102	5.93666	17.7916	2.46465e-05	0.000247754	3.60598	NO	protein_coding
CUL4A	0.256597	6.85486	17.7843	2.47422e-05	0.000248553	3.60458	NO	protein_coding
CGGBP1	-0.347808	6.24709	17.7711	2.49139e-05	0.000250115	3.60186	NO	protein_coding
FBXW2	-0.280016	6.46572	17.7612	2.50433e-05	0.00025125	3.59989	NO	protein_coding
PKN3	1.16497	1.98593	17.7354	2.53853e-05	0.000254349	3.59457	UP	protein_coding
BICC1	-0.850838	6.22528	17.7222	2.55621e-05	0.000255954	3.59184	NO	protein_coding
FAM83D	1.81591	3.38213	17.7209	2.55803e-05	0.000255969	3.59181	UP	protein_coding
EMC10	0.382381	6.37976	17.7142	2.56706e-05	0.000256706	3.59056	NO	protein_coding
NDC1	0.942833	5.07141	17.6925	2.59653e-05	0.000259484	3.58589	NO	protein_coding
ARPP19	-0.363749	7.27048	17.6812	2.61194e-05	0.000260751	3.58377	NO	protein_coding
TMEM109	0.645606	5.48683	17.6807	2.6126e-05	0.000260751	3.58377	NO	protein_coding
VGLL4	-0.447555	5.40473	17.6745	2.62112e-05	0.000261432	3.58264	NO	protein_coding
NRP2	-1.01867	7.34962	17.6716	2.62511e-05	0.00026166	3.58226	DOWN	protein_coding
STK4	-0.310248	5.97003	17.6508	2.65398e-05	0.000264366	3.57779	NO	protein_coding
FH	0.446471	5.53403	17.6312	2.68159e-05	0.000266944	3.57358	NO	protein_coding
ANAPC15	0.821435	2.99435	17.6126	2.7079e-05	0.000269388	3.56962	NO	protein_coding
FAM50B	0.73808	2.18709	17.5975	2.72953e-05	0.000271365	3.56645	NO	protein_coding
UPF3B	0.72816	2.15327	17.5942	2.73418e-05	0.000271652	3.56599	NO	protein_coding
REEP4	0.782394	4.07247	17.5897	2.74072e-05	0.00027212	3.56524	NO	protein_coding
RIDA	-0.834256	3.11595	17.588	2.74314e-05	0.00027212	3.56524	NO	protein_coding
TBCD	0.421331	5.99198	17.587	2.74458e-05	0.00027212	3.56524	NO	protein_coding
PPA2	-0.461953	4.29479	17.586	2.74597e-05	0.00027212	3.56524	NO	protein_coding
GNAL	-1.35319	-0.200118	17.5681	2.77204e-05	0.000274527	3.56142	DOWN	protein_coding
SRSF8	-0.598569	4.39975	17.5642	2.77773e-05	0.000274913	3.5608	NO	protein_coding
CCDC15	1.43545	1.7687	17.5422	2.81006e-05	0.000277934	3.55606	UP	protein_coding
CSPG4	0.750661	8.49683	17.5379	2.81642e-05	0.000278384	3.55536	NO	protein_coding
ZNF277	-0.652694	3.93509	17.5329	2.8238e-05	0.000278934	3.5545	NO	protein_coding
PTPN12	-0.365767	6.69531	17.5009	2.87176e-05	0.000283489	3.54746	NO	protein_coding
KIFC3	0.650573	5.65377	17.468	2.92192e-05	0.00028793	3.54071	NO	protein_coding
WNK4	0.752755	4.51952	17.4667	2.9239e-05	0.00028793	3.54071	NO	protein_coding
TMED8	-0.415342	4.01778	17.46	2.93417e-05	0.000288539	3.5398	NO	protein_coding
ZBTB14	-0.617664	3.16506	17.4534	2.94441e-05	0.000289362	3.53856	NO	protein_coding
ADISSP	0.513393	4.33417	17.4329	2.97633e-05	0.000292311	3.53415	NO	protein_coding
NAV2	0.780367	7.089	17.4253	2.9882e-05	0.00029329	3.5327	NO	protein_coding
NOC2L	0.562039	6.40828	17.4075	3.01637e-05	0.00029579	3.52902	NO	protein_coding
ZNF776	-0.351555	4.3104	17.4068	3.01752e-05	0.00029579	3.52902	NO	protein_coding
ARSI	-0.74144	3.81348	17.3982	3.03107e-05	0.000296929	3.52735	NO	protein_coding
VMA21	-0.470563	5.93001	17.3916	3.04174e-05	0.000297784	3.5261	NO	protein_coding
KCTD20	-0.510928	6.59888	17.3734	3.07086e-05	0.000300444	3.52224	NO	protein_coding
MGST2	-0.902945	2.36527	17.3666	3.0819e-05	0.000301333	3.52095	NO	protein_coding
PAPOLA	-0.328316	7.35449	17.3447	3.11759e-05	0.000304629	3.51623	NO	protein_coding
BNIP3L	-0.786269	7.28537	17.3412	3.12347e-05	0.000305009	3.51569	NO	protein_coding
PRDX6	-0.468538	8.24051	17.3305	3.14105e-05	0.000306532	3.51352	NO	protein_coding
ENPP1	0.756991	6.07123	17.3087	3.17727e-05	0.000309695	3.50907	NO	protein_coding
CMTM6	-0.416868	6.60109	17.3086	3.17749e-05	0.000309695	3.50907	NO	protein_coding
SVEP1	-1.41669	8.18693	17.2956	3.19922e-05	0.000311512	3.50653	DOWN	protein_coding
ALPL	-2.34882	3.19829	17.2951	3.20019e-05	0.000311512	3.50653	DOWN	protein_coding
SLITRK1	1.87923	2.50152	17.2903	3.20818e-05	0.000312092	3.50572	UP	protein_coding
ZNF275	-0.356184	5.25151	17.2857	3.21594e-05	0.000312649	3.50494	NO	protein_coding
PAK4	0.480723	5.23725	17.2761	3.23229e-05	0.000314041	3.50301	NO	protein_coding
OIP5	2.19951	-0.0762812	17.2735	3.23662e-05	0.000314263	3.50271	UP	protein_coding
RPL39	-0.611677	6.60277	17.2711	3.24071e-05	0.000314461	3.50243	NO	protein_coding
ATP5ME	0.869868	2.83429	17.2637	3.25349e-05	0.000315502	3.501	NO	protein_coding
MCAM	0.594309	6.61355	17.2477	3.28098e-05	0.000317968	3.49762	NO	protein_coding
HEPH	-0.914457	4.39869	17.2292	3.31308e-05	0.000320785	3.49379	NO	protein_coding
MSC	-1.12389	3.72569	17.2285	3.31422e-05	0.000320785	3.49379	DOWN	protein_coding
HNRNPUL2	0.322329	6.42619	17.2164	3.3354e-05	0.000322631	3.49129	NO	protein_coding
SPOPL	-0.382399	4.73458	17.2105	3.34589e-05	0.000323443	3.4902	NO	protein_coding
TMEM170B	-0.81859	1.58413	17.2071	3.35186e-05	0.000323816	3.4897	NO	protein_coding
MCM7	1.29386	5.65261	17.1903	3.38153e-05	0.000326477	3.48615	UP	protein_coding
PODXL	2.19567	4.71215	17.1766	3.40598e-05	0.000328632	3.48329	UP	protein_coding
ZNF726	1.81376	-0.205276	17.1732	3.41222e-05	0.000329028	3.48277	UP	protein_coding
IREB2	-0.332126	6.21652	17.1639	3.42884e-05	0.000330319	3.48107	NO	protein_coding
MRPL4	0.480724	4.72093	17.1634	3.4299e-05	0.000330319	3.48107	NO	protein_coding
LAMA5	-1.19846	6.90325	17.1589	3.43795e-05	0.000330886	3.48032	DOWN	protein_coding
PSCA	1.32518	-0.444562	17.1573	3.44086e-05	0.00033096	3.48022	UP	protein_coding
ATP8B3	0.812469	3.16983	17.144	3.46508e-05	0.00033308	3.47745	NO	protein_coding
RBL1	1.2829	3.65086	17.1292	3.49216e-05	0.00033527	3.47461	UP	protein_coding
OSTF1	0.679252	3.65088	17.1292	3.49221e-05	0.00033527	3.47461	NO	protein_coding
SQOR	-0.793265	4.94399	17.1216	3.5061e-05	0.000336393	3.47315	NO	protein_coding
SMARCA4	0.430096	7.40257	17.1091	3.52935e-05	0.000338413	3.47055	NO	protein_coding
TPST1	-0.738317	5.437	17.0993	3.54749e-05	0.00033994	3.4686	NO	protein_coding
CXCL16	-1.68303	0.276655	17.0969	3.55208e-05	0.000340168	3.46831	DOWN	protein_coding
PHC2	-0.39252	6.4364	17.0931	3.55912e-05	0.000340588	3.46777	NO	protein_coding
TNFAIP8	-1.26627	4.32108	17.0922	3.56089e-05	0.000340588	3.46777	DOWN	protein_coding
THEMIS2	-0.891584	2.11033	17.0908	3.56343e-05	0.000340618	3.46773	NO	protein_coding
GOLGA4	0.495816	7.49492	17.0736	3.5959e-05	0.000343509	3.46406	NO	protein_coding
IQGAP1	0.467294	9.14476	17.0722	3.59857e-05	0.000343551	3.46401	NO	protein_coding
NCBP2	-0.381493	5.95028	17.0699	3.60283e-05	0.000343744	3.46376	NO	protein_coding
SMC1A	0.64635	5.85729	17.0491	3.64258e-05	0.000347321	3.45927	NO	protein_coding
MAD1L1	0.542175	4.17801	17.008	3.72229e-05	0.000354702	3.45014	NO	protein_coding
TMOD1	-1.65735	2.6369	16.9991	3.73982e-05	0.000356151	3.44837	DOWN	protein_coding
SAR1A	-0.355792	7.58841	16.9935	3.75082e-05	0.000356978	3.44736	NO	protein_coding
HECTD2	-0.575421	4.35315	16.9922	3.75333e-05	0.000356996	3.44734	NO	protein_coding
BLOC1S6	-0.464262	6.11007	16.9847	3.76815e-05	0.000358184	3.44589	NO	protein_coding
SNRPN	-0.469117	5.4032	16.9725	3.79245e-05	0.000360271	3.44337	NO	protein_coding
POLR2M	-0.426062	5.58706	16.9668	3.80383e-05	0.000361129	3.44234	NO	protein_coding
TRIB1	-0.594989	5.04144	16.9566	3.82441e-05	0.000362859	3.44026	NO	protein_coding
MXI1	-0.955174	3.95216	16.9212	3.89634e-05	0.000369292	3.43263	NO	protein_coding
CD302	-1.15353	3.73055	16.9209	3.89702e-05	0.000369292	3.43263	DOWN	protein_coding
PCMTD1	-0.79699	5.52456	16.9033	3.93323e-05	0.000372495	3.42888	NO	protein_coding
CPD	-0.566706	8.53106	16.8656	4.01232e-05	0.000379751	3.4205	NO	protein_coding
ZFP36	0.929861	4.06747	16.8586	4.02694e-05	0.000380782	3.41932	NO	protein_coding
CNTRL	0.910222	3.91892	16.8581	4.02816e-05	0.000380782	3.41932	NO	protein_coding
SEC22B	-0.388698	7.73174	16.8178	4.11446e-05	0.000388701	3.41038	NO	protein_coding
BBS9	-0.510098	3.99233	16.8022	4.14846e-05	0.000391671	3.40708	NO	protein_coding
ALDH16A1	0.722244	3.30488	16.793	4.16876e-05	0.000393279	3.4053	NO	protein_coding
PTBP3	-0.389493	6.65466	16.7921	4.1706e-05	0.000393279	3.4053	NO	protein_coding
UST	-0.569918	4.96518	16.79	4.1753e-05	0.000393481	3.40508	NO	protein_coding
H3C6	1.5523	4.25729	16.7855	4.18528e-05	0.000394131	3.40436	UP	protein_coding
FAM151B	-0.920938	0.34132	16.7845	4.18732e-05	0.000394131	3.40436	NO	protein_coding
PNMA8A	-1.35863	1.61423	16.7799	4.19756e-05	0.000394854	3.40356	DOWN	protein_coding
HLA.DMA	-1.43699	2.03426	16.7722	4.21468e-05	0.000396221	3.40206	DOWN	protein_coding
SNF8	0.403085	4.43503	16.7381	4.29099e-05	0.000403149	3.39453	NO	protein_coding
FNTA	-0.290588	5.54026	16.7361	4.29559e-05	0.000403334	3.39433	NO	protein_coding
NFIC	0.475151	8.51405	16.7321	4.30465e-05	0.000403938	3.39368	NO	protein_coding
PLAAT4	-2.10013	0.806915	16.7307	4.30793e-05	0.000404	3.39362	DOWN	protein_coding
TMEM175	0.558594	4.01564	16.727	4.31633e-05	0.000404541	3.39304	NO	protein_coding
UBFD1	-0.338353	7.02546	16.724	4.32301e-05	0.00040492	3.39263	NO	protein_coding
VASH2	-2.83035	1.39112	16.7148	4.34414e-05	0.000406651	3.39078	DOWN	protein_coding
EPS8L1	1.1605	0.0761768	16.6955	4.3885e-05	0.000410555	3.38663	UP	protein_coding
HMG20B	0.442134	5.67043	16.6785	4.42794e-05	0.000413992	3.38301	NO	protein_coding
SNRPA1	0.588503	3.99746	16.6529	4.48806e-05	0.000419359	3.37741	NO	protein_coding
CCDC136	0.682077	3.27941	16.646	4.50452e-05	0.000420641	3.37609	NO	protein_coding
PERP	-0.420632	7.1222	16.6446	4.50789e-05	0.0004207	3.37603	NO	protein_coding
HSD17B11	-0.581244	4.13228	16.6261	4.55212e-05	0.000424056	3.37258	NO	protein_coding
BDH1	1.05996	0.801504	16.6073	4.59726e-05	0.000428002	3.36855	UP	protein_coding
YTHDF2	-0.297103	6.23924	16.5936	4.63069e-05	0.000430853	3.36567	NO	protein_coding
JAG1	-0.68545	5.15218	16.5841	4.65408e-05	0.000432767	3.36375	NO	protein_coding
ARHGEF3	-1.22842	1.53238	16.5721	4.68344e-05	0.000434974	3.36154	DOWN	protein_coding
PITRM1	0.487921	6.64811	16.5721	4.68347e-05	0.000434974	3.36154	NO	protein_coding
KPNA2	0.909637	7.05266	16.567	4.69604e-05	0.000435879	3.36063	NO	protein_coding
GLYCTK	0.870415	2.35346	16.5603	4.71277e-05	0.000437168	3.35935	NO	protein_coding
LAS1L	0.419306	4.87392	16.5463	4.74775e-05	0.000440147	3.3564	NO	protein_coding
METTL9	-0.343832	6.17848	16.5329	4.78138e-05	0.00044299	3.35361	NO	protein_coding
ATG13	-0.391685	6.2369	16.5318	4.78418e-05	0.00044299	3.35361	NO	protein_coding
FEM1B	-0.465891	6.36309	16.5286	4.79211e-05	0.000443458	3.35315	NO	protein_coding
DCUN1D3	-0.354558	5.83989	16.4835	4.90756e-05	0.000453868	3.34307	NO	protein_coding
MYORG	1.29987	2.33742	16.4725	4.93618e-05	0.000456241	3.34081	UP	protein_coding
DHX16	0.362479	4.927	16.4434	5.01234e-05	0.000463002	3.33442	NO	protein_coding
HAUS8	1.49053	1.56409	16.4377	5.02765e-05	0.000463859	3.33361	UP	protein_coding
TMEM243	-0.541243	3.00362	16.4324	5.04163e-05	0.00046487	3.33267	NO	protein_coding
GRIK2	0.648053	4.79964	16.4121	5.09588e-05	0.00046959	3.32828	NO	protein_coding
RPL26L1	0.696975	2.88175	16.3966	5.13775e-05	0.000473165	3.32499	NO	protein_coding
PTGR3	-0.537768	4.72375	16.3877	5.16181e-05	0.000475096	3.32322	NO	protein_coding
NDUFAF2	0.979475	2.20273	16.3845	5.1707e-05	0.00047563	3.32273	NO	protein_coding
EVA1B	0.656769	5.03678	16.3793	5.18483e-05	0.000476489	3.32195	NO	protein_coding
PGM2	0.55754	4.89819	16.3788	5.18623e-05	0.000476489	3.32195	NO	protein_coding
RGS10	-0.573891	4.58314	16.3577	5.2443e-05	0.000481249	3.31763	NO	protein_coding
SLC4A8	0.625845	3.8448	16.3532	5.25685e-05	0.000482113	3.31685	NO	protein_coding
COMMD6	-0.543109	4.46598	16.3512	5.26232e-05	0.000482327	3.31666	NO	protein_coding
GET4	0.387329	4.59304	16.3366	5.30309e-05	0.000485774	3.31357	NO	protein_coding
VAMP4	-0.585018	4.92029	16.3297	5.32222e-05	0.000487237	3.31226	NO	protein_coding
ADAMTS8	-3.27611	3.02914	16.3219	5.34438e-05	0.000488974	3.31071	DOWN	protein_coding
ARL6IP1	0.762044	6.58752	16.3134	5.3682e-05	0.000490706	3.30918	NO	protein_coding
RCBTB1	-0.354346	5.23874	16.3121	5.3721e-05	0.000490706	3.30918	NO	protein_coding
SNX25	0.519154	4.28251	16.3118	5.37288e-05	0.000490706	3.30918	NO	protein_coding
SLC39A11	-0.566231	4.19658	16.3046	5.39317e-05	0.000492267	3.3078	NO	protein_coding
RBMS1	-0.383736	6.82719	16.3011	5.40329e-05	0.000492898	3.30724	NO	protein_coding
AZIN1	-0.374845	7.51647	16.2936	5.42461e-05	0.000494549	3.30579	NO	protein_coding
TUBA1B	0.622968	9.80127	16.2815	5.45936e-05	0.000497423	3.30327	NO	protein_coding
TEAD3	-0.445747	6.18228	16.28	5.46373e-05	0.000497526	3.30318	NO	protein_coding
HECA	-0.433565	4.93224	16.25	5.55087e-05	0.000505162	3.29657	NO	protein_coding
NCK1	-0.516964	4.76781	16.2459	5.56284e-05	0.000505952	3.29589	NO	protein_coding
NUDC	0.621774	4.96018	16.2428	5.57223e-05	0.000506506	3.29541	NO	protein_coding
ENSG00000258728	-1.03347	2.37257	16.2192	5.64202e-05	0.000512548	3.29027	DOWN	protein_coding
PDGFD	-2.92031	4.08656	16.207	5.67844e-05	0.000515521	3.28775	DOWN	protein_coding
CRIPT	-0.610441	4.54626	16.206	5.68146e-05	0.000515521	3.28775	NO	protein_coding
RPTOR	0.371876	6.09159	16.1617	5.8157e-05	0.000527391	3.27787	NO	protein_coding
INTS6L	-0.645356	3.41977	16.1467	5.86196e-05	0.000531273	3.27468	NO	protein_coding
MBOAT7	0.386701	7.40795	16.1449	5.86767e-05	0.000531477	3.27452	NO	protein_coding
COX17	1.02044	1.73988	16.1288	5.91761e-05	0.00053537	3.27135	UP	protein_coding
CMKLR2	1.36201	1.99734	16.1221	5.93881e-05	0.000536972	3.27005	UP	protein_coding
TCHP	0.562722	3.18622	16.1149	5.96136e-05	0.000538694	3.26866	NO	protein_coding
RPS19BP1	0.547229	3.99233	16.0877	6.04756e-05	0.000546163	3.26268	NO	protein_coding
SSR1	-0.340402	8.3091	16.0795	6.07387e-05	0.000548217	3.26105	NO	protein_coding
SEMA5A	0.578259	8.04839	16.0653	6.11944e-05	0.000551733	3.25827	NO	protein_coding
CREB3L1	0.471847	8.35654	16.0651	6.12001e-05	0.000551733	3.25827	NO	protein_coding
POSTN	-2.29935	7.36878	16.0608	6.13414e-05	0.000552684	3.25752	DOWN	protein_coding
FUCA2	0.470871	6.82323	16.0561	6.14934e-05	0.000553535	3.25685	NO	protein_coding
ICAM1	-1.1067	6.6439	16.0556	6.15079e-05	0.000553535	3.25685	DOWN	protein_coding
CMC1	0.767133	1.85807	16.052	6.16266e-05	0.000554175	3.25635	NO	protein_coding
GLRX	-0.731826	6.23748	16.0512	6.16511e-05	0.000554175	3.25635	NO	protein_coding
FTH1	-0.813614	10.3244	16.0339	6.22201e-05	0.000558963	3.25262	NO	protein_coding
ASPN	-2.22466	-0.182529	16.0317	6.22922e-05	0.000559284	3.25237	DOWN	protein_coding
PPP4R2	-0.337034	6.1805	16.0246	6.25263e-05	0.000561059	3.25099	NO	protein_coding
ZFYVE16	-0.343748	6.04251	15.9969	6.34465e-05	0.000568653	3.24515	NO	protein_coding
MRPS34	0.599066	4.18394	15.9889	6.37154e-05	0.00057073	3.24357	NO	protein_coding
ZNF24	-0.268676	6.16252	15.9877	6.37553e-05	0.000570755	3.24355	NO	protein_coding
DNLZ	0.86122	1.9839	15.9731	6.42485e-05	0.000574501	3.24071	NO	protein_coding
TMEM120A	0.464439	4.03632	15.9671	6.4452e-05	0.000575986	3.23959	NO	protein_coding
ATP7A	-0.518776	5.97021	15.9489	6.50756e-05	0.000581222	3.23566	NO	protein_coding
MAGED4B	0.887445	5.32255	15.9344	6.55777e-05	0.000585365	3.23257	NO	protein_coding
CDKN2B	-1.05915	4.40225	15.9292	6.57554e-05	0.000586059	3.23206	DOWN	protein_coding
ASS1	-1.17788	4.65155	15.9286	6.57783e-05	0.000586059	3.23206	DOWN	protein_coding
PCBP2	-0.313309	8.52188	15.9274	6.58179e-05	0.000586059	3.23206	NO	protein_coding
RNF11	-0.373865	6.69273	15.9011	6.67391e-05	0.000593322	3.22671	NO	protein_coding
RALGPS2	-0.967177	6.6624	15.881	6.7454e-05	0.000599331	3.22233	NO	protein_coding
RASL11A	-1.63997	1.4317	15.8723	6.77635e-05	0.000601734	3.2206	DOWN	protein_coding
CD163L1	1.14098	3.28517	15.8699	6.78475e-05	0.000602132	3.22031	UP	protein_coding
SINHCAF	-0.718662	4.27118	15.8688	6.78885e-05	0.000602148	3.2203	NO	protein_coding
ATP6V0A1	0.352539	6.03516	15.8676	6.79333e-05	0.000602198	3.22026	NO	protein_coding
DSCC1	1.85462	1.12614	15.8615	6.81509e-05	0.00060378	3.21912	UP	protein_coding
NRBF2	-0.434082	4.49796	15.8516	6.851e-05	0.000606611	3.21709	NO	protein_coding
YDJC	0.646995	2.64848	15.8427	6.88318e-05	0.00060876	3.21555	NO	protein_coding
UBXN4	-0.287019	7.12056	15.8345	6.91291e-05	0.000611038	3.21393	NO	protein_coding
CPQ	-0.548896	4.7737	15.8317	6.92327e-05	0.000611602	3.21353	NO	protein_coding
ZBTB10	-0.58916	4.72254	15.8263	6.94295e-05	0.000612988	3.21255	NO	protein_coding
STOM	-0.955558	8.65219	15.8225	6.9572e-05	0.000613894	3.21191	NO	protein_coding
RNMT	-0.400826	5.53767	15.8169	6.97759e-05	0.00061534	3.21088	NO	protein_coding
SRSF5	-0.388349	6.78939	15.8112	6.99867e-05	0.000616845	3.20982	NO	protein_coding
GTF2A2	-0.334068	4.86426	15.7954	7.05726e-05	0.000621653	3.20645	NO	protein_coding
CENPN	1.18343	4.17309	15.7933	7.06522e-05	0.000621998	3.20621	UP	protein_coding
RABEP2	0.644853	3.91483	15.792	7.07018e-05	0.000622079	3.20615	NO	protein_coding
TMPO	1.14841	5.80811	15.7826	7.10535e-05	0.000624816	3.20425	UP	protein_coding
PRKACA	0.395697	6.24397	15.7809	7.11179e-05	0.000625024	3.2041	NO	protein_coding
MFSD10	0.461594	5.41715	15.7664	7.16645e-05	0.000629469	3.20103	NO	protein_coding
DNAJC9	1.05512	4.03812	15.7644	7.17385e-05	0.000629759	3.20083	UP	protein_coding
MAP7D1	0.500031	7.58021	15.7454	7.24651e-05	0.000635775	3.1967	NO	protein_coding
SERPINB6	0.320458	6.16492	15.7378	7.27562e-05	0.000637965	3.1952	NO	protein_coding
COL4A6	-1.99711	3.18862	15.7298	7.30625e-05	0.000640285	3.19363	DOWN	protein_coding
ZBED5	-0.429294	5.04657	15.7107	7.38066e-05	0.000646438	3.18947	NO	protein_coding
NEDD8	0.491382	5.50196	15.7055	7.4007e-05	0.000647825	3.18854	NO	protein_coding
CTSO	-0.820814	4.70937	15.7042	7.40586e-05	0.000647907	3.18849	NO	protein_coding
FMO2	-5.52735	-0.729485	15.6964	7.43667e-05	0.000650233	3.18693	DOWN	protein_coding
SLC2A9	-1.44447	-0.128881	15.6925	7.45192e-05	0.000651196	3.18629	DOWN	protein_coding
C21orf58	1.33154	2.58353	15.6884	7.46794e-05	0.000652225	3.1856	UP	protein_coding
PSRC1	0.929334	3.38477	15.6855	7.47948e-05	0.000652863	3.18518	NO	protein_coding
ADAMTS13	-1.25415	1.29485	15.6807	7.49856e-05	0.000654157	3.18432	DOWN	protein_coding
RPS13	-0.34682	7.29127	15.6686	7.54667e-05	0.000657981	3.18179	NO	protein_coding
CXCL6	-6.45593	1.19215	15.6666	7.55459e-05	0.000658298	3.18158	DOWN	protein_coding
FAM168B	-0.324391	7.40377	15.6533	7.60798e-05	0.000662575	3.17877	NO	protein_coding
WDR76	1.32493	3.46034	15.6435	7.64765e-05	0.000665653	3.17675	UP	protein_coding
PLCH2	1.80918	1.69284	15.6202	7.74213e-05	0.000673496	3.17167	UP	protein_coding
MRPL41	0.667973	4.01547	15.5948	7.84702e-05	0.000681849	3.16631	NO	protein_coding
MRPS7	0.561353	3.97342	15.5924	7.85692e-05	0.000682323	3.16601	NO	protein_coding
CENPJ	0.888831	3.87547	15.5883	7.87424e-05	0.000683441	3.1653	NO	protein_coding
XIAP	-0.300094	6.22541	15.5814	7.90298e-05	0.000685549	3.16396	NO	protein_coding
ABHD11	0.908415	2.33958	15.5802	7.90773e-05	0.000685574	3.16395	NO	protein_coding
PARP14	-0.697355	6.45362	15.5655	7.96949e-05	0.000690157	3.16105	NO	protein_coding
PHACTR4	0.356651	5.37875	15.5655	7.96957e-05	0.000690157	3.16105	NO	protein_coding
LRRC28	-0.580845	2.91409	15.5607	7.98984e-05	0.000691524	3.16019	NO	protein_coding
XPO1	0.502673	8.04753	15.5579	8.00163e-05	0.000692154	3.1598	NO	protein_coding
PSME1	-0.517639	5.50991	15.5489	8.03973e-05	0.000694828	3.15812	NO	protein_coding
ELFN1	0.678417	4.40268	15.5485	8.04157e-05	0.000694828	3.15812	NO	protein_coding
LBH	-1.35269	7.60122	15.5267	8.13487e-05	0.000702494	3.15336	DOWN	protein_coding
PPP6R1	0.534904	6.83671	15.5232	8.15005e-05	0.000703411	3.15279	NO	protein_coding
ATAD5	1.60644	2.84477	15.5183	8.17096e-05	0.00070482	3.15192	UP	protein_coding
DDX6	-0.276513	8.36452	15.5094	8.2094e-05	0.000707739	3.15013	NO	protein_coding
CHURC1	-0.497266	4.99897	15.5064	8.2227e-05	0.000708488	3.14967	NO	protein_coding
ZNF254	-0.55016	3.9947	15.4966	8.26531e-05	0.00071176	3.14767	NO	protein_coding
RYBP	-0.610552	4.98759	15.4925	8.28353e-05	0.000712931	3.14695	NO	protein_coding
CISD3	0.423985	3.40189	15.4809	8.33419e-05	0.000716889	3.14455	NO	protein_coding
POLR2A	0.306539	8.26086	15.4487	8.47742e-05	0.000728802	3.13739	NO	protein_coding
FBXL22	-2.16293	-0.799767	15.4263	8.57883e-05	0.000736697	3.13271	DOWN	protein_coding
UBE2H	-0.636462	7.52023	15.4095	8.65542e-05	0.000742859	3.12909	NO	protein_coding
TIMM10	0.851622	2.35844	15.4066	8.66839e-05	0.000743558	3.12869	NO	protein_coding
DHX38	0.429122	5.62876	15.4052	8.6747e-05	0.000743684	3.12861	NO	protein_coding
MYO19	0.665421	4.96334	15.3905	8.74261e-05	0.000748767	3.12565	NO	protein_coding
G6PC3	0.47144	5.82329	15.3903	8.74373e-05	0.000748767	3.12565	NO	protein_coding
HSPE1	0.606156	4.44382	15.3872	8.75807e-05	0.000749578	3.12518	NO	protein_coding
EZH2	1.38394	3.58431	15.3828	8.7784e-05	0.000750899	3.12442	UP	protein_coding
PCDHGB7	-0.463533	5.21897	15.3788	8.79717e-05	0.000752087	3.12373	NO	protein_coding
NUDT11	-0.490615	3.77068	15.3732	8.82332e-05	0.000753903	3.12268	NO	protein_coding
CEP131	0.705646	3.11513	15.3721	8.82825e-05	0.000753906	3.12268	NO	protein_coding
RASL11B	-2.53655	-0.544307	15.369	8.84269e-05	0.00075472	3.12221	DOWN	protein_coding
ATOSB	0.62111	5.52668	15.3658	8.85765e-05	0.000755389	3.12183	NO	protein_coding
PCSK7	0.504647	6.49887	15.3652	8.86035e-05	0.000755389	3.12183	NO	protein_coding
SNED1	-1.02622	3.37542	15.3516	8.92433e-05	0.000760422	3.11895	DOWN	protein_coding
CDC73	-0.263338	6.13503	15.3433	8.96368e-05	0.000763352	3.11727	NO	protein_coding
LTBP4	-1.37736	7.1309	15.3331	9.01233e-05	0.000767071	3.11516	DOWN	protein_coding
HIPK2	-0.658082	9.28642	15.325	9.05131e-05	0.000769962	3.11353	NO	protein_coding
YIPF2	0.39349	5.18245	15.3205	9.07274e-05	0.000771359	3.11274	NO	protein_coding
RNH1	0.454606	6.73116	15.3187	9.08142e-05	0.00077167	3.11257	NO	protein_coding
DZIP1	-0.477881	5.94256	15.3058	9.1435e-05	0.000776154	3.11005	NO	protein_coding
ATP5MC1	0.477281	4.21525	15.3056	9.14429e-05	0.000776154	3.11005	NO	protein_coding
RWDD2A	-0.658902	2.87796	15.3031	9.15643e-05	0.000776756	3.10972	NO	protein_coding
CUTA	0.421714	6.23765	15.2942	9.19966e-05	0.000779993	3.10791	NO	protein_coding
PMM1	0.328138	4.68307	15.2899	9.22099e-05	0.000781371	3.10714	NO	protein_coding
SNX18	-0.708615	7.76279	15.2888	9.22643e-05	0.000781402	3.10713	NO	protein_coding
ZNF568	-0.450889	3.26853	15.2765	9.28626e-05	0.000786036	3.10456	NO	protein_coding
ZNF616	-0.509576	3.74162	15.2739	9.29933e-05	0.000786709	3.10419	NO	protein_coding
NFXL1	-0.508648	4.24271	15.269	9.32346e-05	0.000788316	3.1033	NO	protein_coding
KLHL9	-0.290405	6.29606	15.2659	9.3385e-05	0.000789155	3.10284	NO	protein_coding
NDUFS8	0.371027	5.17118	15.2633	9.35167e-05	0.000789833	3.10246	NO	protein_coding
HEXA	-0.484667	6.37359	15.2598	9.36883e-05	0.000790849	3.10191	NO	protein_coding
HELLS	1.31738	5.11673	15.2527	9.4041e-05	0.00079339	3.10051	UP	protein_coding
CILP	-3.14433	0.0623411	15.2478	9.42887e-05	0.000795044	3.09961	DOWN	protein_coding
JOSD2	0.714068	3.39613	15.2425	9.45515e-05	0.000796823	3.09864	NO	protein_coding
RFTN2	-1.91252	1.40865	15.2365	9.48517e-05	0.000798915	3.0975	DOWN	protein_coding
TRAM1	-0.627563	9.11265	15.2293	9.52146e-05	0.000801003	3.09637	NO	protein_coding
CHP1	-0.373254	7.05098	15.2286	9.5251e-05	0.000801003	3.09637	NO	protein_coding
INA	1.23016	3.268	15.2285	9.52558e-05	0.000801003	3.09637	UP	protein_coding
SPTBN1	0.481284	9.21769	15.2101	9.61898e-05	0.000807974	3.0926	NO	protein_coding
NAP1L1	-0.351822	8.15584	15.2079	9.63013e-05	0.000808469	3.09234	NO	protein_coding
TACC2	0.504027	4.16784	15.2015	9.6625e-05	0.000810744	3.09112	NO	protein_coding
RPS15	0.614409	7.4263	15.199	9.67544e-05	0.000811386	3.09077	NO	protein_coding
ULK2	-0.493621	4.48235	15.1813	9.76634e-05	0.000818563	3.08695	NO	protein_coding
ITPKB	-0.799474	4.17787	15.1658	9.84724e-05	0.000824894	3.0836	NO	protein_coding
PDGFC	-0.473538	6.92632	15.1622	9.86572e-05	0.00082586	3.08309	NO	protein_coding
CCDC6	-0.354032	6.89737	15.1465	9.94812e-05	0.000831224	3.08028	NO	protein_coding
ZBTB46	-0.426931	4.02622	15.1462	9.94983e-05	0.000831224	3.08028	NO	protein_coding
UBE2F	-0.467001	4.79044	15.1356	0.000100058	0.000835449	3.07808	NO	protein_coding
NEDD9	-0.835271	5.5509	15.1177	0.000101012	0.000842956	3.07419	NO	protein_coding
PELI1	-0.7386	1.85771	15.1131	0.000101258	0.000843836	3.07374	NO	protein_coding
SCAMP3	0.52043	5.73927	15.1129	0.000101269	0.000843836	3.07374	NO	protein_coding
PRPF6	0.34428	5.92058	15.1127	0.000101282	0.000843836	3.07374	NO	protein_coding
TMEM68	-0.46161	4.02089	15.1096	0.000101446	0.000844742	3.07328	NO	protein_coding
C9orf72	-0.723244	3.08665	15.1063	0.000101622	0.000845746	3.07276	NO	protein_coding
DRP2	0.603928	5.25156	15.1033	0.000101786	0.000846658	3.07229	NO	protein_coding
HARS1	0.404851	6.10027	15.1008	0.000101922	0.000847327	3.07195	NO	protein_coding
RAB1A	-0.306268	7.06012	15.0986	0.000102037	0.000847826	3.07169	NO	protein_coding
TCEAL7	-0.642153	3.46589	15.0959	0.000102184	0.000848588	3.0713	NO	protein_coding
CCDC51	0.58893	1.9247	15.0931	0.000102338	0.000849407	3.07088	NO	protein_coding
REXO5	1.04716	1.61627	15.0877	0.000102632	0.000851389	3.06987	UP	protein_coding
TRAIP	1.79021	1.25041	15.0811	0.000102992	0.000853602	3.06874	UP	protein_coding
HR	-2.18406	2.87909	15.0807	0.000103009	0.000853602	3.06874	DOWN	protein_coding
RAB8A	0.354415	6.03381	15.0785	0.000103131	0.000853691	3.0687	NO	protein_coding
COPE	0.442743	6.31788	15.0731	0.000103425	0.0008552	3.06793	NO	protein_coding
WASL	-0.343678	5.96342	15.0662	0.000103807	0.000857897	3.06656	NO	protein_coding
STRADB	-0.547794	4.86596	15.0508	0.000104656	0.000864336	3.06332	NO	protein_coding
COQ10B	-0.461096	5.17397	15.0493	0.000104739	0.000864336	3.06332	NO	protein_coding
CARM1	0.442303	6.3508	15.049	0.000104754	0.000864336	3.06332	NO	protein_coding
ZRANB1	-0.556288	5.82671	15.0449	0.000104985	0.000865777	3.06259	NO	protein_coding
FAP	-0.719922	7.31567	15.0405	0.000105228	0.000867313	3.06182	NO	protein_coding
DDIAS	1.94659	2.23999	15.0171	0.000106543	0.000877679	3.05666	UP	protein_coding
TXNRD2	0.469746	3.99478	15.0142	0.000106703	0.000878113	3.05645	NO	protein_coding
PLSCR4	-0.620555	3.60072	15.0141	0.00010671	0.000878113	3.05645	NO	protein_coding
SORT1	-0.429191	7.04598	14.9927	0.00010793	0.00088768	3.05174	NO	protein_coding
ZFAND3	-0.378822	6.67609	14.9882	0.000108188	0.000888853	3.05117	NO	protein_coding
INMT	-1.2532	2.82962	14.9822	0.000108533	0.000891208	3.05002	DOWN	protein_coding
NFX1	-0.279616	5.72386	14.9504	0.000110373	0.000905356	3.04318	NO	protein_coding
PLD1	-0.780485	4.32598	14.9483	0.000110499	0.000905905	3.04292	NO	protein_coding
CHCHD3	0.51365	4.50109	14.9437	0.000110768	0.000907627	3.04209	NO	protein_coding
EHBP1L1	0.500553	5.82106	14.9371	0.000111155	0.000909234	3.04132	NO	protein_coding
HTATSF1	0.425522	4.64973	14.937	0.00011116	0.000909234	3.04132	NO	protein_coding
SYNPO2L	1.51049	2.52382	14.9366	0.000111184	0.000909234	3.04132	UP	protein_coding
YES1	-0.34069	6.2402	14.936	0.000111222	0.000909234	3.04132	NO	protein_coding
SETBP1	-1.56171	1.87423	14.9353	0.00011126	0.000909234	3.04132	DOWN	protein_coding
PAF1	0.431866	4.95101	14.9322	0.000111447	0.000910277	3.04083	NO	protein_coding
PLEKHA3	-0.395306	5.10834	14.931	0.000111514	0.000910346	3.04079	NO	protein_coding
APC	0.440946	6.86186	14.9276	0.000111718	0.000911525	3.04023	NO	protein_coding
ERMP1	-0.563387	4.45622	14.9218	0.000112063	0.000913857	3.03912	NO	protein_coding
CAST	0.441201	7.64904	14.9173	0.000112331	0.000915296	3.03844	NO	protein_coding
PDGFRA	-0.999543	8.58207	14.9168	0.000112359	0.000915296	3.03844	NO	protein_coding
RO60	-0.29781	7.28436	14.8832	0.00011438	0.000931264	3.03093	NO	protein_coding
CNOT6	-0.39148	5.42359	14.8698	0.000115194	0.0009374	3.02808	NO	protein_coding
TRIQK	-0.469888	4.20119	14.8659	0.000115431	0.000938831	3.02741	NO	protein_coding
DNAJC7	0.282001	5.76559	14.8586	0.000115876	0.000941948	3.02597	NO	protein_coding
FLII	0.513763	7.85653	14.8505	0.000116376	0.000945521	3.02433	NO	protein_coding
RHOBTB1	-0.554925	4.75467	14.8478	0.000116545	0.000946392	3.02393	NO	protein_coding
DDA1	0.417429	5.67322	14.843	0.000116843	0.000948307	3.02305	NO	protein_coding
H2AC25	0.799262	1.34743	14.8312	0.000117577	0.00095376	3.02056	NO	protein_coding
FAM171B	-0.692569	6.04567	14.8287	0.000117728	0.000954083	3.02041	NO	protein_coding
STAT5A	-0.98843	2.3724	14.8285	0.000117741	0.000954083	3.02041	NO	protein_coding
PLCB3	0.446731	5.92014	14.8218	0.000118164	0.000956691	3.01923	NO	protein_coding
FAM91A1	-0.298925	6.49025	14.8214	0.000118187	0.000956691	3.01923	NO	protein_coding
MEDAG	-2.35069	-1.09972	14.8182	0.000118387	0.000957805	3.01872	DOWN	protein_coding
CNIH4	-0.418258	4.70041	14.8062	0.000119144	0.000963428	3.01618	NO	protein_coding
PPP1R13L	1.07068	3.11054	14.7929	0.000119984	0.000969705	3.01336	UP	protein_coding
CSNK2A2	-0.337447	6.44982	14.7917	0.000120061	0.000969822	3.01331	NO	protein_coding
TUB	-0.355281	5.27305	14.7884	0.000120271	0.000971007	3.01278	NO	protein_coding
EIF4EBP2	-0.551734	6.79379	14.7747	0.000121151	0.000977596	3.00984	NO	protein_coding
SAMHD1	-0.429222	4.74123	14.7644	0.000121816	0.000981986	3.00789	NO	protein_coding
C14orf119	-0.38222	5.41475	14.7626	0.000121933	0.000981986	3.00789	NO	protein_coding
COL3A1	-1.09572	10.3014	14.7623	0.00012195	0.000981986	3.00789	DOWN	protein_coding
MVD	0.624878	4.64747	14.7481	0.00012287	0.000988879	3.00486	NO	protein_coding
TBCB	0.444725	5.14484	14.7443	0.000123118	0.000990351	3.00421	NO	protein_coding
KATNB1	0.441428	3.83751	14.7412	0.000123323	0.000991485	3.00371	NO	protein_coding
OLFML2A	-2.28523	6.00354	14.7358	0.000123674	0.000993786	3.00271	DOWN	protein_coding
SSRP1	0.545771	6.21711	14.7342	0.00012378	0.000993984	3.00262	NO	protein_coding
ATG9A	0.457203	6.28918	14.7335	0.000123828	0.000993984	3.00262	NO	protein_coding
CCDC68	-1.18052	3.83921	14.731	0.00012399	0.000994306	3.00248	DOWN	protein_coding
THOP1	0.603134	4.91583	14.7309	0.000123997	0.000994306	3.00248	NO	protein_coding
ZNF185	1.46025	4.13022	14.7214	0.000124627	0.000998832	3.00051	UP	protein_coding
ELF1	-0.399598	5.42606	14.719	0.00012478	0.000999543	3.0002	NO	protein_coding
CYP46A1	1.15742	-0.0683272	14.7125	0.000125216	0.00100251	2.99891	UP	protein_coding
GPR39	0.806761	1.96324	14.7114	0.000125285	0.00100254	2.9989	NO	protein_coding
ST13	-0.359753	7.35626	14.7104	0.000125353	0.00100256	2.99889	NO	protein_coding
NTM	0.625739	6.13077	14.7088	0.000125461	0.00100291	2.99874	NO	protein_coding
JAK3	-0.8458	3.05379	14.6979	0.000126187	0.00100819	2.99646	NO	protein_coding
SHC2	-1.10941	1.29787	14.6803	0.000127374	0.00101661	2.99284	DOWN	protein_coding
SH3PXD2B	-0.451869	6.61561	14.6477	0.000129592	0.00103378	2.98557	NO	protein_coding
CRACD	-1.10752	1.99491	14.6421	0.00012998	0.00103634	2.9845	DOWN	protein_coding
ANKDD1A	-0.852323	2.32994	14.6394	0.000130168	0.0010373	2.9841	NO	protein_coding
PHETA2	-0.476985	3.25421	14.6365	0.000130362	0.00103831	2.98367	NO	protein_coding
TONSL	1.20206	3.57846	14.6319	0.000130684	0.00104033	2.98283	UP	protein_coding
NOC4L	0.623427	3.7864	14.6287	0.000130905	0.00104155	2.98232	NO	protein_coding
VEGFC	0.780454	6.09051	14.6205	0.000131479	0.00104558	2.98064	NO	protein_coding
TP53I11	-0.821662	6.04006	14.6168	0.000131733	0.00104706	2.98003	NO	protein_coding
SHOC2	-0.328854	6.09534	14.6047	0.000132585	0.00105328	2.97746	NO	protein_coding
CENPT	0.566436	5.83922	14.5994	0.000132955	0.00105568	2.97647	NO	protein_coding
TRAPPC5	0.508198	4.28003	14.591	0.000133551	0.00105986	2.97475	NO	protein_coding
ANKRA2	-0.592446	3.94438	14.5748	0.000134704	0.00106846	2.97124	NO	protein_coding
LTBP3	-0.542377	7.30153	14.5675	0.00013523	0.00107208	2.96977	NO	protein_coding
CFAP97	-0.401908	5.80423	14.5644	0.000135452	0.00107259	2.96957	NO	protein_coding
NUFIP2	-0.332597	7.81462	14.5639	0.000135487	0.00107259	2.96957	NO	protein_coding
ZMYM2	-0.375417	6.49955	14.5626	0.000135579	0.00107259	2.96957	NO	protein_coding
STON1	-0.947183	4.83645	14.5621	0.000135615	0.00107259	2.96957	NO	protein_coding
FBLIM1	-0.437637	6.69399	14.5617	0.000135642	0.00107259	2.96957	NO	protein_coding
TXNDC17	0.573728	4.16805	14.5454	0.00013682	0.00108134	2.96604	NO	protein_coding
CCDC77	0.959853	1.88827	14.5372	0.000137419	0.00108551	2.96436	NO	protein_coding
NDUFS7	0.471825	4.43727	14.5361	0.000137497	0.00108557	2.96434	NO	protein_coding
CYP3A7	-2.53789	-0.254686	14.5333	0.000137707	0.00108668	2.9639	DOWN	protein_coding
KCNE1	1.37377	-0.0657063	14.5313	0.000137852	0.00108726	2.96367	UP	protein_coding
TMEM182	-1.02205	0.130632	14.5293	0.000137993	0.00108782	2.96344	DOWN	protein_coding
TDRP	-0.579719	3.01733	14.5254	0.000138284	0.00108925	2.96287	NO	protein_coding
BTF3L4	-0.465795	5.5122	14.5242	0.000138373	0.00108925	2.96287	NO	protein_coding
TIPRL	-0.350598	5.28831	14.524	0.000138387	0.00108925	2.96287	NO	protein_coding
EXO1	1.81659	2.33863	14.5208	0.00013862	0.00109052	2.96237	UP	protein_coding
VWCE	-1.17258	1.76183	14.5153	0.000139027	0.00109317	2.96131	DOWN	protein_coding
VDR	0.519943	4.98109	14.5098	0.000139429	0.00109577	2.96028	NO	protein_coding
RLIM	-0.327521	6.99734	14.5044	0.000139829	0.00109835	2.95926	NO	protein_coding
GEM	-0.700254	4.31915	14.5014	0.000140052	0.00109954	2.95879	NO	protein_coding
PHB1	0.425095	6.05898	14.4861	0.000141194	0.00110794	2.95548	NO	protein_coding
SMOX	-0.542246	3.95493	14.4849	0.000141289	0.00110812	2.95541	NO	protein_coding
KIAA2013	0.433512	5.77789	14.4809	0.000141586	0.00110988	2.95472	NO	protein_coding
EFL1	0.535862	4.53439	14.4767	0.000141901	0.00111179	2.95398	NO	protein_coding
SIRT7	0.526429	4.07866	14.4727	0.000142202	0.00111358	2.95328	NO	protein_coding
ITPA	0.59043	3.72203	14.4702	0.000142393	0.0011145	2.95292	NO	protein_coding
PGM3	-0.291241	7.17698	14.4675	0.0001426	0.00111556	2.95251	NO	protein_coding
PGPEP1	-0.513372	6.19743	14.4479	0.00014409	0.00112664	2.94822	NO	protein_coding
RPS26	0.793761	6.98128	14.4441	0.000144384	0.00112824	2.9476	NO	protein_coding
FAM111B	2.29254	2.55713	14.4433	0.000144441	0.00112824	2.9476	UP	protein_coding
ARHGAP11B	1.57067	0.509503	14.4388	0.00014479	0.00113039	2.94677	UP	protein_coding
LAMTOR1	0.33714	5.38418	14.4187	0.000146338	0.0011419	2.94237	NO	protein_coding
NXNL2	1.12906	0.0105715	14.4099	0.000147027	0.00114669	2.94055	UP	protein_coding
MSANTD4	-0.389313	4.70539	14.4032	0.000147548	0.00114959	2.93946	NO	protein_coding
ARRDC4	-1.50147	4.80337	14.4012	0.000147706	0.00115024	2.93921	DOWN	protein_coding
RAB3B	0.64439	9.91695	14.3887	0.000148694	0.00115735	2.93654	NO	protein_coding
RELL2	0.825675	1.84051	14.3716	0.000150048	0.0011667	2.93304	NO	protein_coding
DCTN2	0.247384	6.27884	14.3565	0.00015126	0.00117553	2.92977	NO	protein_coding
CHCHD6	0.780775	1.86159	14.3505	0.000151737	0.00117864	2.92862	NO	protein_coding
TMEM106A	0.621305	4.04934	14.3431	0.00015234	0.00118273	2.92711	NO	protein_coding
MPRIP	0.393527	8.26065	14.3397	0.000152615	0.00118427	2.92655	NO	protein_coding
PARD6G	-0.672553	3.70395	14.3359	0.00015292	0.00118561	2.92606	NO	protein_coding
KLF10	-0.687073	5.43788	14.3356	0.000152942	0.00118561	2.92606	NO	protein_coding
NSRP1	0.529463	3.82729	14.3248	0.000153825	0.00119185	2.92378	NO	protein_coding
AKR1C3	-2.21389	-0.364469	14.3071	0.000155277	0.00120189	2.92014	DOWN	protein_coding
CHAF1B	1.03764	2.53928	14.3049	0.000155458	0.00120269	2.91985	UP	protein_coding
FLOT1	0.42126	6.65532	14.2996	0.000155895	0.00120547	2.91885	NO	protein_coding
ATP2B4	0.767353	10.5494	14.2866	0.000156977	0.00121322	2.91606	NO	protein_coding
ENSG00000284776	0.570628	2.84277	14.2827	0.000157302	0.00121512	2.91538	NO	protein_coding
LRRC7	2.09118	-0.13337	14.276	0.000157869	0.00121888	2.91404	UP	protein_coding
PUM2	-0.252133	6.66284	14.2735	0.000158078	0.00121989	2.91368	NO	protein_coding
WWP1	-0.319433	4.97164	14.2545	0.000159681	0.00123164	2.90952	NO	protein_coding
TMEM183A	-0.457059	5.11565	14.2489	0.000160156	0.00123469	2.90844	NO	protein_coding
ZC3H4	0.554426	6.10906	14.24	0.000160912	0.00123973	2.90667	NO	protein_coding
ZNF286A	-0.415964	4.5766	14.2393	0.000160972	0.00123973	2.90667	NO	protein_coding
DOCK10	0.506952	6.51992	14.235	0.000161339	0.00124194	2.9059	NO	protein_coding
ACP3	-1.56469	2.26491	14.2327	0.000161541	0.00124287	2.90557	DOWN	protein_coding
MTFR2	1.90129	0.651092	14.2226	0.000162406	0.0012489	2.90347	UP	protein_coding
WIPI1	-0.465745	5.81473	14.2159	0.000162989	0.00125276	2.90213	NO	protein_coding
SAFB	0.699415	5.11237	14.2029	0.000164117	0.0012608	2.89935	NO	protein_coding
REEP3	-0.382389	6.91062	14.1972	0.000164614	0.00126288	2.89864	NO	protein_coding
ELP6	0.548636	3.05895	14.197	0.000164634	0.00126288	2.89864	NO	protein_coding
ZNF322	-0.420209	4.64172	14.1872	0.000165489	0.0012688	2.89661	NO	protein_coding
S1PR1	-0.873656	4.20683	14.1817	0.00016598	0.00127193	2.89554	NO	protein_coding
BANP	0.628763	3.59382	14.1672	0.000167265	0.00128115	2.8924	NO	protein_coding
MRPL23	0.509559	3.99196	14.1521	0.000168611	0.00129081	2.88914	NO	protein_coding
DACT1	-0.911453	4.0236	14.1449	0.000169256	0.0012951	2.8877	NO	protein_coding
CACYBP	0.562125	4.96552	14.1407	0.000169631	0.00129733	2.88695	NO	protein_coding
GPATCH4	0.795289	3.0241	14.1271	0.000170867	0.00130519	2.88433	NO	protein_coding
TTC1	0.328612	4.80352	14.1266	0.000170914	0.00130519	2.88433	NO	protein_coding
DCHS1	-0.907907	6.28029	14.1186	0.000171636	0.00131006	2.88271	NO	protein_coding
TCEAL3	1.00646	2.88578	14.1146	0.000172005	0.00131217	2.88201	UP	protein_coding
CTSH	-1.09808	1.04141	14.1137	0.000172083	0.00131217	2.88201	DOWN	protein_coding
KLHL28	-0.477942	4.2765	14.112	0.000172246	0.00131276	2.88182	NO	protein_coding
MOK	0.98552	5.55328	14.0861	0.000174628	0.00133025	2.87607	NO	protein_coding
ZNF532	-0.45507	6.70053	14.083	0.000174916	0.00133179	2.87556	NO	protein_coding
OPCML	1.97561	1.21234	14.0783	0.000175354	0.00133446	2.87469	UP	protein_coding
MMS22L	0.876413	4.40948	14.0617	0.00017691	0.00134497	2.87129	NO	protein_coding
COLGALT2	0.664314	4.28953	14.0351	0.000179434	0.00136348	2.86535	NO	protein_coding
DDX39A	0.950674	4.70117	14.034	0.000179533	0.00136357	2.86532	NO	protein_coding
DNAJC18	-0.446704	4.16175	14.0263	0.00018027	0.00136849	2.86376	NO	protein_coding
C2orf49	-0.445616	4.48495	14.0143	0.000181427	0.00137591	2.86141	NO	protein_coding
NCOA6	0.364394	6.01512	14.0131	0.000181537	0.00137607	2.86136	NO	protein_coding
DNMT1	0.70538	6.73437	14.012	0.000181644	0.0013762	2.86132	NO	protein_coding
USP38	-0.291428	5.35935	14.0084	0.000181995	0.00137752	2.8609	NO	protein_coding
SLC16A2	0.446777	6.66238	14.0071	0.000182118	0.00137776	2.86083	NO	protein_coding
BET1	-0.514718	4.26747	14.0015	0.000182662	0.00138053	2.85995	NO	protein_coding
PHC1	-0.583229	5.04567	14.0015	0.000182665	0.00138053	2.85995	NO	protein_coding
BCS1L	0.43317	3.57799	13.9994	0.000182866	0.00138137	2.85969	NO	protein_coding
PTEN	-0.381748	7.24774	13.9958	0.000183216	0.00138334	2.85907	NO	protein_coding
SESTD1	-0.3918	4.85937	13.9947	0.000183326	0.00138349	2.85902	NO	protein_coding
XPO6	-0.331409	7.54318	13.9841	0.000184366	0.00139013	2.85695	NO	protein_coding
CRBN	-0.387301	4.1706	13.9839	0.000184386	0.00139013	2.85695	NO	protein_coding
EPB41L3	0.631869	5.35195	13.9723	0.000185525	0.00139803	2.85448	NO	protein_coding
COMT	0.457579	6.30863	13.9675	0.000186	0.00140092	2.85359	NO	protein_coding
CDH11	-0.510156	8.34091	13.9657	0.000186173	0.00140154	2.85339	NO	protein_coding
PLPP1	-0.511034	4.247	13.9632	0.000186424	0.00140274	2.85302	NO	protein_coding
PLOD3	0.424818	7.27819	13.96	0.00018674	0.00140443	2.8525	NO	protein_coding
INPP1	-0.391642	4.28491	13.955	0.00018724	0.0014075	2.85155	NO	protein_coding
GNAI2	0.391071	8.72854	13.9374	0.000189002	0.00141925	2.84794	NO	protein_coding
PDCD4	-0.594565	5.83133	13.9369	0.000189055	0.00141925	2.84794	NO	protein_coding
GGPS1	-0.358515	4.33376	13.9366	0.000189079	0.00141925	2.84794	NO	protein_coding
PTPN18	0.494247	4.01741	13.9346	0.000189286	0.00142011	2.84768	NO	protein_coding
NCOR2	0.542721	8.38104	13.9303	0.000189711	0.00142227	2.84702	NO	protein_coding
SCN9A	0.464315	8.22839	13.9299	0.000189759	0.00142227	2.84702	NO	protein_coding
ST6GALNAC6	-0.450584	5.63422	13.9283	0.000189922	0.0014228	2.84686	NO	protein_coding
SPSB1	-0.639983	5.13221	13.9177	0.000190995	0.00143014	2.84462	NO	protein_coding
ACAD8	-0.446627	3.80635	13.9079	0.000191992	0.00143628	2.84276	NO	protein_coding
TRAM2	0.466692	8.90331	13.9071	0.000192071	0.00143628	2.84276	NO	protein_coding
TOR1AIP2	-0.272062	7.91896	13.8966	0.000193151	0.00144288	2.84077	NO	protein_coding
HNRNPUL2.BSCL2	2.16854	3.02605	13.8942	0.000193396	0.0014439	2.84046	UP	protein_coding
MON1A	0.523747	3.50345	13.8782	0.000195048	0.00145482	2.83719	NO	protein_coding
SPART	-0.310792	6.12687	13.874	0.000195483	0.00145736	2.83643	NO	protein_coding
UBE2D3	-0.303826	7.86169	13.8664	0.000196279	0.00146258	2.83488	NO	protein_coding
DPP8	-0.261623	5.99496	13.8626	0.000196673	0.0014641	2.83443	NO	protein_coding
GPAA1	0.370923	6.23833	13.8609	0.000196849	0.0014647	2.83425	NO	protein_coding
JAK1	-0.318619	7.92095	13.8581	0.000197142	0.00146617	2.83381	NO	protein_coding
RYK	-0.366341	6.22702	13.8498	0.000198021	0.00147152	2.83223	NO	protein_coding
CDK2	0.800554	4.98188	13.8495	0.000198053	0.00147152	2.83223	NO	protein_coding
KCNH1	1.30898	3.57002	13.8398	0.000199074	0.00147781	2.83038	UP	protein_coding
BUD23	0.40716	4.43245	13.8396	0.000199091	0.00147781	2.83038	NO	protein_coding
MXD3	1.01508	1.99671	13.8376	0.000199308	0.0014787	2.83012	UP	protein_coding
TTC17	-0.350719	6.67099	13.8344	0.000199646	0.0014805	2.82959	NO	protein_coding
LUZP1	-0.357231	6.86548	13.8304	0.00020007	0.00148293	2.82888	NO	protein_coding
CRELD2	0.544092	4.92776	13.8264	0.000200503	0.00148542	2.82815	NO	protein_coding
MCM8	1.01567	3.7387	13.8209	0.000201086	0.00148839	2.82728	UP	protein_coding
ORMDL1	-0.453203	5.45832	13.8116	0.000202081	0.00149453	2.82549	NO	protein_coding
CORIN	-1.88452	3.50392	13.8113	0.000202121	0.00149453	2.82549	DOWN	protein_coding
TRIAP1	-0.501907	3.75806	13.8048	0.000202814	0.00149893	2.82422	NO	protein_coding
MED28	-0.410297	6.0719	13.7991	0.000203435	0.0015028	2.8231	NO	protein_coding
BTN3A3	-0.802722	4.6202	13.7975	0.000203611	0.00150338	2.82293	NO	protein_coding
NDUFS5	0.651262	4.2558	13.7905	0.000204368	0.00150734	2.82179	NO	protein_coding
MRPL45	-0.410152	4.22666	13.7898	0.000204441	0.00150734	2.82179	NO	protein_coding
ATP10A	1.00577	5.57824	13.788	0.000204643	0.0015081	2.82157	UP	protein_coding
MRPL27	0.389014	4.04947	13.7825	0.000205238	0.00151176	2.82052	NO	protein_coding
HDAC6	0.316838	4.6827	13.7756	0.000205992	0.00151659	2.81913	NO	protein_coding
FAM72D	1.90592	0.318953	13.7626	0.000207423	0.00152581	2.8165	UP	protein_coding
C7orf50	0.579809	4.87269	13.7624	0.000207443	0.00152581	2.8165	NO	protein_coding
RAB6A	-0.343755	7.09358	13.7595	0.000207769	0.00152713	2.81612	NO	protein_coding
ZNF791	-0.324563	5.04119	13.7585	0.000207881	0.00152713	2.81612	NO	protein_coding
TBC1D16	-0.37948	6.24141	13.7581	0.000207921	0.00152713	2.81612	NO	protein_coding
REXO4	0.368412	4.07426	13.7565	0.000208102	0.00152729	2.81608	NO	protein_coding
XPOT	-0.465945	7.75693	13.7561	0.000208141	0.00152729	2.81608	NO	protein_coding
RAB31	-0.555279	5.41615	13.754	0.000208376	0.00152829	2.81579	NO	protein_coding
USPL1	-0.358199	4.34171	13.7509	0.000208715	0.00153005	2.81529	NO	protein_coding
PPP6C	-0.327836	5.52716	13.747	0.000209151	0.00153251	2.8146	NO	protein_coding
MRPL30	-0.383166	5.17063	13.7414	0.000209778	0.00153637	2.8135	NO	protein_coding
CFAP298	0.527708	3.15838	13.7354	0.000210446	0.00154053	2.81233	NO	protein_coding
CCT5	0.505364	7.02926	13.7241	0.000211722	0.00154914	2.80991	NO	protein_coding
MINDY2	-0.396795	6.06227	13.7215	0.000212014	0.00155027	2.80959	NO	protein_coding
CAND1	-0.252089	7.4945	13.7209	0.000212078	0.00155027	2.80959	NO	protein_coding
ABCF2	0.329763	5.52875	13.7146	0.000212798	0.00155479	2.80833	NO	protein_coding
REXO1	0.568371	5.68993	13.6946	0.000215067	0.00157062	2.80393	NO	protein_coding
NFE2L2	-0.758526	6.9885	13.691	0.000215483	0.00157283	2.80332	NO	protein_coding
GMCL1	-0.419853	3.54033	13.6899	0.000215616	0.00157283	2.80332	NO	protein_coding
POM121C	0.436746	6.60648	13.6893	0.000215676	0.00157283	2.80332	NO	protein_coding
WWP2	0.312461	5.22201	13.6808	0.000216656	0.00157923	2.80155	NO	protein_coding
TEK	-1.70489	5.3559	13.6781	0.00021697	0.00158032	2.80125	DOWN	protein_coding
SNTB2	-0.302914	7.597	13.6777	0.000217012	0.00158032	2.80125	NO	protein_coding
NCLN	0.627322	6.8825	13.675	0.000217329	0.00158116	2.80102	NO	protein_coding
ZKSCAN8	-0.39382	5.85678	13.675	0.000217332	0.00158116	2.80102	NO	protein_coding
CACUL1	-0.28255	6.07602	13.671	0.000217795	0.00158377	2.80031	NO	protein_coding
BTBD1	-0.30552	6.78839	13.6691	0.000218009	0.00158406	2.80023	NO	protein_coding
FAM171A1	0.30878	5.85826	13.6689	0.00021804	0.00158406	2.80023	NO	protein_coding
POLD2	0.488783	5.74202	13.6622	0.00021881	0.00158816	2.79911	NO	protein_coding
EMP3	0.602085	6.7841	13.6622	0.00021881	0.00158816	2.79911	NO	protein_coding
PAQR4	1.19748	2.73647	13.6399	0.000221426	0.00160638	2.79415	UP	protein_coding
SMAP2	0.454905	5.64767	13.6304	0.000222557	0.00161383	2.79214	NO	protein_coding
DHX32	-0.485035	4.39251	13.6185	0.000223969	0.0016233	2.7896	NO	protein_coding
ZNF230	-0.61277	1.60989	13.6106	0.000224912	0.00162936	2.78798	NO	protein_coding
TOMM34	0.712615	5.0286	13.6079	0.000225238	0.00163096	2.78756	NO	protein_coding
KIAA1191	-0.310466	6.2291	13.6065	0.0002254	0.00163137	2.78745	NO	protein_coding
RC3H1	-0.355457	6.61948	13.5979	0.000226439	0.00163812	2.78566	NO	protein_coding
ABCB8	0.420274	4.68089	13.5958	0.000226693	0.00163841	2.78558	NO	protein_coding
CLPX	-0.319627	5.21123	13.581	0.000228481	0.00165056	2.78237	NO	protein_coding
HMGN4	-0.341733	5.03445	13.5795	0.000228668	0.00165114	2.78222	NO	protein_coding
SEC24A	-0.318665	6.9356	13.566	0.000230319	0.00166228	2.7793	NO	protein_coding
MAP1B	0.523579	10.3858	13.5561	0.000231533	0.00166968	2.77737	NO	protein_coding
ARL14EP	-0.363237	4.27805	13.5559	0.000231562	0.00166968	2.77737	NO	protein_coding
PSMA7	0.432514	6.02272	13.5358	0.000234051	0.00168664	2.77298	NO	protein_coding
SLC27A4	0.634256	4.64903	13.5352	0.000234134	0.00168664	2.77298	NO	protein_coding
PCMT1	0.577476	5.02047	13.5337	0.00023432	0.0016872	2.77283	NO	protein_coding
ATG12	-0.272447	6.01005	13.5189	0.000236175	0.00169975	2.76961	NO	protein_coding
ADPRHL1	1.72878	1.40468	13.5176	0.000236338	0.00170013	2.76952	UP	protein_coding
C2CD2	-0.435486	5.85975	13.5164	0.000236483	0.00170038	2.76945	NO	protein_coding
NOL12	0.530634	3.33927	13.5098	0.000237321	0.00170561	2.76812	NO	protein_coding
EIF2AK2	-0.37504	7.26498	13.5076	0.000237598	0.00170597	2.76803	NO	protein_coding
DHCR24	0.79531	7.52466	13.5069	0.000237686	0.00170597	2.76803	NO	protein_coding
CNTROB	0.471422	4.9733	13.5068	0.000237705	0.00170597	2.76803	NO	protein_coding
GMNN	0.992251	2.9306	13.5049	0.000237937	0.00170608	2.768	NO	protein_coding
SOCS4	-0.39922	5.89371	13.5041	0.000238047	0.00170608	2.768	NO	protein_coding
SYT7	-1.2403	1.44198	13.504	0.000238052	0.00170608	2.768	DOWN	protein_coding
FAT4	0.516996	7.43553	13.5002	0.000238544	0.00170881	2.76731	NO	protein_coding
RNF24	-0.564459	6.44922	13.4819	0.000240873	0.00172469	2.76329	NO	protein_coding
DCP2	-0.390885	5.29286	13.4735	0.000241957	0.00173164	2.76154	NO	protein_coding
MYH9	0.395198	11.3369	13.4676	0.000242715	0.00173626	2.76039	NO	protein_coding
EXT1	-0.559414	8.26952	13.4603	0.000243667	0.00174226	2.75889	NO	protein_coding
FGF7	-1.17953	6.41788	13.4544	0.00024443	0.00174691	2.75773	DOWN	protein_coding
SNX30	-0.473167	5.73974	13.4397	0.000246356	0.00175985	2.75453	NO	protein_coding
DYNC1H1	0.541456	10.4161	13.4355	0.000246911	0.0017622	2.75394	NO	protein_coding
RASSF1	0.470475	4.11283	13.4349	0.000246988	0.0017622	2.75394	NO	protein_coding
DNAJC17	0.573973	2.63971	13.4276	0.000247949	0.00176795	2.75253	NO	protein_coding
ITGB8	-1.43263	5.08996	13.417	0.000249354	0.00177704	2.7503	DOWN	protein_coding
SULT1C4	-2.93544	0.294972	13.4162	0.000249456	0.00177704	2.7503	DOWN	protein_coding
VHL	-0.374932	5.25235	13.41	0.00025028	0.00178209	2.74907	NO	protein_coding
NBAS	-0.250144	7.01712	13.4016	0.000251412	0.00178932	2.74731	NO	protein_coding
RFX8	1.50675	3.05519	13.3882	0.000253208	0.00180126	2.74442	UP	protein_coding
ABCC4	-0.677843	7.34758	13.3811	0.000254169	0.0018059	2.74331	NO	protein_coding
EHD3	-0.919621	5.96343	13.381	0.000254191	0.0018059	2.74331	NO	protein_coding
SERPINB7	1.46508	6.15299	13.3808	0.000254211	0.0018059	2.74331	UP	protein_coding
VAMP7	-0.543742	4.31297	13.3759	0.000254883	0.00180984	2.74236	NO	protein_coding
GLIPR1	0.754837	8.37673	13.3637	0.000256535	0.00182072	2.73976	NO	protein_coding
HHIP	2.54249	3.37991	13.3613	0.000256875	0.0018223	2.73938	UP	protein_coding
CCDC107	0.621157	3.74124	13.3514	0.000258227	0.00183104	2.7373	NO	protein_coding
C11orf98	0.716784	3.12014	13.3348	0.000260523	0.00184562	2.73386	NO	protein_coding
ZNF644	-0.306366	5.74126	13.3329	0.000260792	0.00184668	2.73361	NO	protein_coding
TRAPPC2	-0.407961	4.04946	13.3299	0.000261211	0.00184879	2.73311	NO	protein_coding
RAP1GAP2	0.595682	4.13087	13.3211	0.000262442	0.00185665	2.73127	NO	protein_coding
TXLNB	-1.72646	-0.302215	13.3083	0.000264232	0.0018676	2.72872	DOWN	protein_coding
ZGRF1	1.12139	2.85918	13.3067	0.000264465	0.00186839	2.72853	UP	protein_coding
FGF11	-1.58372	-0.280055	13.3047	0.000264746	0.00186915	2.72836	DOWN	protein_coding
ZMIZ1	0.458367	7.96059	13.3036	0.000264903	0.00186915	2.72836	NO	protein_coding
ICE1	-0.260854	6.33536	13.3033	0.000264938	0.00186915	2.72836	NO	protein_coding
USF3	-0.448417	5.47916	13.2983	0.000265643	0.00187327	2.7274	NO	protein_coding
DIAPH1	0.616949	6.93806	13.2934	0.000266346	0.00187736	2.72645	NO	protein_coding
WIZ	0.293469	6.27802	13.2891	0.000266951	0.00188076	2.72567	NO	protein_coding
ATRIP	0.696676	3.00094	13.2872	0.000267222	0.00188181	2.72542	NO	protein_coding
SERPING1	-0.878846	4.28889	13.281	0.000268113	0.00188722	2.72418	NO	protein_coding
IGDCC4	-0.721487	5.91165	13.2784	0.000268476	0.00188891	2.72379	NO	protein_coding
MSH5	0.906762	2.80262	13.277	0.000268675	0.00188945	2.72366	NO	protein_coding
SERPINB2	1.92765	6.79236	13.2761	0.00026881	0.00188953	2.72365	UP	protein_coding
MRPL42	-0.361984	5.77343	13.2745	0.000269045	0.00189032	2.72346	NO	protein_coding
VTN	-1.98208	-0.539816	13.2722	0.000269375	0.00189116	2.72327	DOWN	protein_coding
CCL2	-1.4662	5.17768	13.2715	0.000269476	0.00189116	2.72327	DOWN	protein_coding
PRKAA1	-0.288899	6.95002	13.2704	0.000269636	0.00189116	2.72327	NO	protein_coding
ENG	0.572626	7.89802	13.2702	0.000269656	0.00189116	2.72327	NO	protein_coding
ADAM17	-0.414267	6.11794	13.269	0.000269824	0.00189148	2.7232	NO	protein_coding
SMS	0.412305	7.0038	13.2661	0.000270252	0.00189361	2.72271	NO	protein_coding
YME1L1	-0.254734	7.41812	13.2593	0.000271237	0.00189965	2.72133	NO	protein_coding
GBF1	0.326313	7.66817	13.2578	0.000271455	0.00190031	2.72118	NO	protein_coding
LDAF1	-0.678779	4.64439	13.2556	0.000271771	0.00190165	2.72087	NO	protein_coding
CXCL10	-2.44607	0.0396533	13.2481	0.000272857	0.00190839	2.71933	DOWN	protein_coding
RCC2	-0.437381	6.29811	13.2433	0.000273559	0.0019124	2.71842	NO	protein_coding
GSTM2	-0.497117	5.31864	13.2425	0.00027368	0.0019124	2.71842	NO	protein_coding
RGPD5	-0.62851	5.62226	13.2416	0.000273806	0.00191241	2.71842	NO	protein_coding
SLC30A7	-0.380057	7.03074	13.2384	0.000274267	0.00191409	2.71804	NO	protein_coding
DAGLB	0.645338	5.09636	13.2379	0.000274351	0.00191409	2.71804	NO	protein_coding
RBM18	-0.34977	4.65204	13.2374	0.00027442	0.00191409	2.71804	NO	protein_coding
FBLN2	-0.864118	5.87748	13.2259	0.000276109	0.00192413	2.71576	NO	protein_coding
OSMR	-0.646745	7.79751	13.219	0.000277123	0.00192899	2.71467	NO	protein_coding
CIMAP1B	-1.91186	-0.95595	13.2188	0.000277151	0.00192899	2.71467	DOWN	protein_coding
AKAP9	0.493591	6.56721	13.2186	0.000277183	0.00192899	2.71467	NO	protein_coding
CAMTA2	0.283701	5.98683	13.212	0.00027816	0.00193491	2.71334	NO	protein_coding
ZBTB8A	-0.49781	3.47071	13.203	0.000279501	0.00194337	2.71144	NO	protein_coding
NAA40	-0.406314	4.53756	13.2	0.000279949	0.0019456	2.71095	NO	protein_coding
NANP	-0.467658	3.69546	13.1958	0.000280573	0.00194906	2.71018	NO	protein_coding
ZNF660	-0.723752	2.27191	13.1949	0.000280713	0.00194915	2.71015	NO	protein_coding
TXNIP	-1.79758	7.14757	13.1938	0.000280872	0.00194938	2.7101	DOWN	protein_coding
MAPK6	-0.342386	6.45574	13.1823	0.000282599	0.00196047	2.70764	NO	protein_coding
KPNA1	-0.301608	6.43606	13.1752	0.000283677	0.00196706	2.70618	NO	protein_coding
CROCC	0.578857	3.38557	13.1662	0.000285042	0.0019751	2.70441	NO	protein_coding
RPLP0	-0.402757	9.50669	13.1659	0.000285093	0.0019751	2.70441	NO	protein_coding
PIK3R3	-0.644311	5.00509	13.1618	0.000285718	0.00197854	2.70365	NO	protein_coding
ERO1B	-0.588175	2.60877	13.1591	0.00028612	0.00198043	2.70324	NO	protein_coding
TENT2	-0.303808	5.35415	13.1567	0.000286496	0.00198214	2.70287	NO	protein_coding
HCFC1	0.497858	7.46059	13.151	0.000287359	0.00198633	2.70195	NO	protein_coding
LRRC1	-0.684867	3.29322	13.1465	0.000288059	0.00198968	2.70122	NO	protein_coding
AKR1B1	-0.839818	6.74445	13.1454	0.000288222	0.00198968	2.70122	NO	protein_coding
GANC	0.510941	3.87332	13.1454	0.000288232	0.00198968	2.70122	NO	protein_coding
FITM2	0.486784	4.40641	13.1424	0.000288685	0.00199192	2.70073	NO	protein_coding
NCBP3	-0.315481	5.86674	13.1381	0.000289354	0.00199564	2.69992	NO	protein_coding
EXOC6	-0.586599	4.22025	13.1293	0.000290707	0.00200407	2.69809	NO	protein_coding
PROSER2	0.815795	2.80837	13.1272	0.000291036	0.00200544	2.69779	NO	protein_coding
NEK9	-0.414024	6.52942	13.1258	0.00029125	0.00200601	2.69767	NO	protein_coding
ZNF84	-0.399756	4.88842	13.1243	0.000291497	0.00200681	2.69749	NO	protein_coding
TBC1D22B	-0.548252	3.97325	13.1232	0.000291656	0.00200701	2.69745	NO	protein_coding
C18orf54	0.962524	3.42358	13.1207	0.000292048	0.00200881	2.69706	NO	protein_coding
MYO5A	0.520507	7.21975	13.1156	0.00029285	0.00201342	2.69606	NO	protein_coding
SYDE1	0.390294	6.49699	13.1006	0.000295198	0.00202866	2.69279	NO	protein_coding
LMF2	0.499804	6.80505	13.0969	0.000295778	0.00203174	2.69213	NO	protein_coding
MFF	-0.481892	5.42971	13.0952	0.000296048	0.00203269	2.69193	NO	protein_coding
ABHD12	0.570459	6.44726	13.0836	0.00029789	0.00204442	2.68943	NO	protein_coding
PHF19	0.783163	4.31399	13.0813	0.000298253	0.002046	2.68909	NO	protein_coding
ARHGAP42	-0.566887	4.21582	13.0749	0.000299277	0.00205211	2.6878	NO	protein_coding
PRKCD	0.407136	4.64558	13.065	0.00030086	0.00206113	2.68589	NO	protein_coding
TPP1	-0.627651	7.6117	13.0616	0.00030142	0.00206312	2.68548	NO	protein_coding
BORCS8	0.487114	3.85837	13.0551	0.000302456	0.00206816	2.68442	NO	protein_coding
MGAT5B	0.905855	1.92612	13.0546	0.000302544	0.00206816	2.68442	NO	protein_coding
ASNSD1	-0.432933	4.99513	13.0545	0.000302559	0.00206816	2.68442	NO	protein_coding
CCNJ	-0.661661	3.47491	13.0481	0.000303599	0.00207435	2.68312	NO	protein_coding
PPCDC	0.689373	1.58151	12.9981	0.000311815	0.00212939	2.67174	NO	protein_coding
COMMD1	0.394108	3.54813	12.9973	0.000311933	0.00212939	2.67174	NO	protein_coding
NUFIP1	-0.512008	3.82618	12.9948	0.00031236	0.00213136	2.67134	NO	protein_coding
JADE3	-0.42176	3.41627	12.986	0.000313829	0.00213855	2.66988	NO	protein_coding
GINS3	1.44131	1.16957	12.9857	0.000313884	0.00213855	2.66988	UP	protein_coding
RUSC2	0.407841	6.86346	12.9854	0.000313933	0.00213855	2.66988	NO	protein_coding
ELAC2	0.373988	5.7292	12.9852	0.000313969	0.00213855	2.66988	NO	protein_coding
NAAA	0.741921	2.93332	12.9831	0.00031431	0.00213992	2.6696	NO	protein_coding
CCNI	-0.605346	7.74845	12.9793	0.000314949	0.00214332	2.66891	NO	protein_coding
PPIL3	-0.443987	3.3402	12.9772	0.000315307	0.0021444	2.66869	NO	protein_coding
MME	-1.00205	7.08637	12.9767	0.000315386	0.0021444	2.66869	DOWN	protein_coding
KHDRBS3	0.623938	3.68936	12.9689	0.000316706	0.00215243	2.66707	NO	protein_coding
CD59	0.462649	9.36306	12.9653	0.00031732	0.00215565	2.66642	NO	protein_coding
TMEM14C	-0.344026	5.60758	12.9578	0.000318586	0.00216329	2.66489	NO	protein_coding
LIN7C	-0.347713	6.76756	12.9486	0.000320168	0.00217308	2.66293	NO	protein_coding
UBL5	0.521262	4.36094	12.944	0.000320947	0.0021774	2.66206	NO	protein_coding
NRIP3	0.676831	5.31029	12.9382	0.000321946	0.00218321	2.6609	NO	protein_coding
TIMM9	-0.498531	3.36581	12.9358	0.000322351	0.00218464	2.66062	NO	protein_coding
GPSM2	0.938685	3.78668	12.9353	0.00032244	0.00218464	2.66062	NO	protein_coding
ZFP36L2	-0.976307	7.30965	12.9338	0.000322709	0.00218526	2.6605	NO	protein_coding
XRCC3	1.2172	2.30036	12.9328	0.000322882	0.00218526	2.6605	UP	protein_coding
GMFB	-0.324935	6.67155	12.9317	0.000323061	0.00218526	2.6605	NO	protein_coding
MLH1	0.331416	4.74534	12.9315	0.0003231	0.00218526	2.6605	NO	protein_coding
CSTF2	0.52013	3.68476	12.9262	0.000324022	0.00219053	2.65945	NO	protein_coding
SCYL2	-0.286608	6.57489	12.924	0.000324396	0.00219209	2.65914	NO	protein_coding
TPGS1	0.770231	2.58677	12.9205	0.000325002	0.0021937	2.65882	NO	protein_coding
PANK4	0.555858	4.33882	12.9203	0.000325034	0.0021937	2.65882	NO	protein_coding
FN3KRP	0.500616	4.00665	12.9202	0.000325061	0.0021937	2.65882	NO	protein_coding
VPS4A	0.329153	6.15209	12.9187	0.00032532	0.00219449	2.65867	NO	protein_coding
MRAS	-0.441213	5.62043	12.9117	0.00032653	0.00220168	2.65725	NO	protein_coding
PCDHGB1	-0.9443	3.77385	12.9083	0.000327137	0.0022048	2.65663	NO	protein_coding
KTN1	0.411109	7.5089	12.9042	0.000327838	0.00220856	2.65589	NO	protein_coding
COX7A2L	-0.377437	5.65468	12.8963	0.000329227	0.00221695	2.65424	NO	protein_coding
CPNE2	0.400644	3.97616	12.8883	0.00033064	0.00222549	2.65258	NO	protein_coding
RFC4	1.0067	2.61357	12.8771	0.000332624	0.00223787	2.65017	UP	protein_coding
NAXE	0.344007	4.48532	12.8743	0.000333129	0.00224028	2.6497	NO	protein_coding
MFAP3	-0.31547	5.46639	12.8712	0.000333684	0.00224303	2.64916	NO	protein_coding
TRIR	0.390957	5.94163	12.8671	0.000334405	0.00224638	2.64852	NO	protein_coding
ACAD11	-0.527154	5.18188	12.8667	0.000334473	0.00224638	2.64852	NO	protein_coding
UEVLD	-0.325558	4.96329	12.8597	0.000335743	0.00225297	2.64724	NO	protein_coding
NUDT15	0.639569	3.46975	12.8596	0.000335748	0.00225297	2.64724	NO	protein_coding
GAS2L3	1.07193	4.11539	12.8578	0.000336083	0.00225334	2.64717	UP	protein_coding
EVI5	-0.412685	6.34148	12.8577	0.000336096	0.00225334	2.64717	NO	protein_coding
TMED1	0.503124	3.69593	12.8516	0.000337187	0.00225967	2.64596	NO	protein_coding
EIF2A	-0.358923	5.81969	12.8356	0.000340083	0.00227808	2.64243	NO	protein_coding
COG6	-0.390972	5.40722	12.8271	0.000341636	0.00228649	2.64083	NO	protein_coding
ANKS6	-0.316443	4.57053	12.8218	0.000342599	0.00229194	2.6398	NO	protein_coding
CCDC9	0.571045	4.08128	12.813	0.000344211	0.00230173	2.63795	NO	protein_coding
RNF114	-0.29267	5.75324	12.8073	0.000345262	0.00230775	2.63681	NO	protein_coding
ARHGEF39	1.37327	0.0292865	12.8037	0.000345928	0.0023112	2.63616	UP	protein_coding
SIGMAR1	0.454929	5.67653	12.794	0.000347732	0.00232123	2.63428	NO	protein_coding
PSMD9	0.284287	4.56471	12.7834	0.000349717	0.00233246	2.63219	NO	protein_coding
ZNRD2	0.532744	3.11649	12.7761	0.000351072	0.00234048	2.6307	NO	protein_coding
YBX1	0.599858	8.05727	12.77	0.000352219	0.00234696	2.62949	NO	protein_coding
PDE4D	-0.914451	3.06138	12.769	0.000352416	0.00234696	2.62949	NO	protein_coding
NOL7	0.423986	4.55074	12.7685	0.000352501	0.00234696	2.62949	NO	protein_coding
UBE2G1	-0.354785	5.88822	12.7658	0.000353021	0.0023494	2.62904	NO	protein_coding
CCDC9B	0.556608	7.10671	12.7649	0.00035318	0.00234944	2.62904	NO	protein_coding
BBS1	-0.552993	3.90335	12.7604	0.00035403	0.00235408	2.62818	NO	protein_coding
DAG1	0.562914	7.5922	12.7533	0.000355374	0.00236177	2.62676	NO	protein_coding
COQ4	0.488353	4.49786	12.7527	0.000355495	0.00236177	2.62676	NO	protein_coding
SEMA4D	-2.54663	0.721443	12.7483	0.000356333	0.0023653	2.62611	DOWN	protein_coding
MAP3K7	-0.290361	6.26537	12.7383	0.000358237	0.00237589	2.62417	NO	protein_coding
YPEL1	-1.48845	0.515765	12.7374	0.000358408	0.002376	2.62415	DOWN	protein_coding
PIK3CA	-0.331969	5.8943	12.7347	0.000358931	0.00237756	2.62387	NO	protein_coding
HSPB6	0.672798	6.90678	12.7346	0.000358953	0.00237756	2.62387	NO	protein_coding
SLC39A6	-0.435506	6.93356	12.7238	0.000361034	0.00238929	2.62173	NO	protein_coding
H2AZ1	0.8702	6.0675	12.7203	0.000361703	0.00239204	2.62123	NO	protein_coding
E2F8	2.46131	0.556537	12.72	0.000361762	0.00239204	2.62123	UP	protein_coding
S100A10	0.521669	6.60445	12.7176	0.000362228	0.0023941	2.62086	NO	protein_coding
CEP72	1.15656	1.15491	12.7115	0.000363414	0.00240091	2.61963	UP	protein_coding
AARSD1	0.471291	3.16831	12.7087	0.000363951	0.00240254	2.61933	NO	protein_coding
DLGAP4	0.470093	7.43146	12.7086	0.000363974	0.00240254	2.61933	NO	protein_coding
CYFIP2	-0.994763	3.83226	12.7075	0.000364191	0.00240294	2.61926	NO	protein_coding
GSTM3	-0.528648	5.20221	12.7042	0.000364831	0.00240613	2.61868	NO	protein_coding
ADAMTS10	-0.884566	3.70393	12.7018	0.0003653	0.0024082	2.61831	NO	protein_coding
TUFM	0.288473	6.56976	12.6991	0.000365829	0.00241065	2.61787	NO	protein_coding
PCDHB2	-1.06808	0.714803	12.6977	0.000366104	0.00241142	2.61773	DOWN	protein_coding
PPM1G	0.446616	5.49462	12.6891	0.000367787	0.00242148	2.61592	NO	protein_coding
QKI	-0.351813	7.52539	12.6849	0.000368616	0.00242589	2.61513	NO	protein_coding
SMYD2	0.408278	4.02247	12.6471	0.000376144	0.00247166	2.60701	NO	protein_coding
ARHGAP20	-0.811061	3.66527	12.6463	0.000376302	0.00247166	2.60701	NO	protein_coding
MAN1A1	-0.776673	6.03981	12.646	0.000376373	0.00247166	2.60701	NO	protein_coding
SLC35G1	-0.461625	2.37381	12.6399	0.000377604	0.00247868	2.60578	NO	protein_coding
RGPD6	0.912237	5.2314	12.636	0.000378386	0.00248276	2.60507	NO	protein_coding
SLC39A9	-0.372317	6.6042	12.6339	0.000378808	0.00248446	2.60477	NO	protein_coding
WDR19	-0.515345	4.80445	12.6257	0.000380471	0.0024943	2.60305	NO	protein_coding
RTL8C	0.509313	6.82414	12.6211	0.000381421	0.00249947	2.60215	NO	protein_coding
PUS3	-0.470157	2.28342	12.6186	0.000381919	0.00250167	2.60177	NO	protein_coding
TBC1D5	-0.339237	6.34168	12.6104	0.000383609	0.00251167	2.60004	NO	protein_coding
RAB1B	0.321227	7.20096	12.6095	0.000383793	0.0025118	2.60001	NO	protein_coding
ARRDC1	0.538863	3.35139	12.6002	0.000385702	0.00252322	2.59804	NO	protein_coding
POMGNT1	0.363444	6.10126	12.5851	0.000388824	0.00254257	2.59473	NO	protein_coding
LRRC20	-0.81548	2.65515	12.5828	0.000389309	0.00254412	2.59446	NO	protein_coding
SMAD2	-0.278386	6.84146	12.5824	0.000389393	0.00254412	2.59446	NO	protein_coding
TRIM23	-0.362054	4.43521	12.5768	0.000390566	0.00255061	2.59336	NO	protein_coding
TSPAN18	-2.2181	-0.724113	12.5761	0.000390718	0.00255061	2.59336	DOWN	protein_coding
SUV39H1	1.08372	2.95361	12.5729	0.000391375	0.00255355	2.59286	UP	protein_coding
CNIH1	-0.348652	6.28382	12.5723	0.000391499	0.00255355	2.59286	NO	protein_coding
KCNE3	-2.434	-0.920461	12.5676	0.000392501	0.00255899	2.59193	DOWN	protein_coding
CLK1	-0.675639	5.49468	12.5602	0.000394043	0.00256761	2.59047	NO	protein_coding
POLR2L	0.609966	6.0627	12.5597	0.000394157	0.00256761	2.59047	NO	protein_coding
PIEZO1	0.624249	8.76375	12.5495	0.000396309	0.00258054	2.58829	NO	protein_coding
TAC3	-2.1867	0.645391	12.54	0.000398332	0.00259262	2.58626	DOWN	protein_coding
KIAA0513	-0.508921	5.47321	12.5317	0.000400112	0.00260089	2.58488	NO	protein_coding
VRK2	0.459217	4.05133	12.5294	0.000400598	0.00260296	2.58453	NO	protein_coding
SWT1	-0.58741	2.25391	12.5281	0.000400887	0.00260373	2.5844	NO	protein_coding
PSMC6	0.331663	5.46898	12.5216	0.000402268	0.00261144	2.58312	NO	protein_coding
RPS6KA5	-1.18089	1.69206	12.521	0.000402413	0.00261144	2.58312	DOWN	protein_coding
ARHGAP28	-2.38827	4.20609	12.5103	0.000404717	0.00262528	2.58082	DOWN	protein_coding
YIPF6	-0.352033	5.74995	12.5089	0.000405027	0.00262619	2.58067	NO	protein_coding
COL12A1	-0.646557	11.2586	12.5077	0.000405289	0.00262678	2.58058	NO	protein_coding
FBLN1	-1.52561	7.40501	12.4999	0.000406963	0.00263541	2.57915	DOWN	protein_coding
RBM14	0.560383	5.49139	12.4914	0.000408825	0.00264635	2.57735	NO	protein_coding
NFKBIB	0.44269	3.87688	12.4844	0.000410358	0.00265516	2.57591	NO	protein_coding
PARD3	-0.336186	5.35642	12.4807	0.000411178	0.00265934	2.57523	NO	protein_coding
MAT2A	-0.38961	7.72943	12.4788	0.000411587	0.00266087	2.57498	NO	protein_coding
USP35	0.396389	4.16906	12.4725	0.000412985	0.00266879	2.57369	NO	protein_coding
H3C11	1.33254	3.80675	12.4696	0.000413639	0.00266984	2.57351	UP	protein_coding
ZNF649	-0.625277	2.48961	12.4694	0.000413669	0.00266984	2.57351	NO	protein_coding
KNSTRN	0.721416	4.09137	12.4597	0.00041583	0.00268266	2.57143	NO	protein_coding
BET1L	-0.382815	5.77059	12.4575	0.000416313	0.00268465	2.57111	NO	protein_coding
RPAP1	0.313823	4.82944	12.4554	0.000416787	0.00268658	2.5708	NO	protein_coding
RBAK	-0.310237	4.66691	12.4545	0.000416995	0.0026868	2.57076	NO	protein_coding
H3C15	3.47052	4.76321	12.4446	0.000419212	0.00269995	2.56864	UP	protein_coding
FAM118B	-0.434478	3.47133	12.4422	0.000419745	0.00270225	2.56827	NO	protein_coding
PLEKHA6	-0.54076	5.94172	12.4304	0.000422403	0.00271823	2.56571	NO	protein_coding
RASSF4	-1.03819	3.31779	12.4158	0.000425726	0.00273846	2.56249	DOWN	protein_coding
B3GAT3	0.432204	4.74801	12.4141	0.000426102	0.00273974	2.56229	NO	protein_coding
UBXN6	0.338224	6.23379	12.4131	0.000426332	0.00274007	2.56224	NO	protein_coding
CCNC	-0.415956	4.9171	12.4099	0.000427055	0.00274262	2.56183	NO	protein_coding
RMDN3	0.422377	4.35869	12.4098	0.000427086	0.00274262	2.56183	NO	protein_coding
NNT	-0.258654	6.23246	12.4088	0.000427325	0.00274302	2.56177	NO	protein_coding
CACNA1C	-0.803652	5.49454	12.4024	0.000428773	0.00275001	2.56067	NO	protein_coding
IMPACT	-0.433362	4.98362	12.4011	0.000429086	0.00275087	2.56053	NO	protein_coding
ZNF724	1.18099	1.95722	12.393	0.00043095	0.00276167	2.55883	UP	protein_coding
ZNF639	-0.413968	4.51485	12.3913	0.000431335	0.00276298	2.55862	NO	protein_coding
CAPN15	0.609544	5.82063	12.3866	0.000432429	0.00276818	2.55781	NO	protein_coding
BMT2	-0.448518	4.2751	12.3863	0.000432506	0.00276818	2.55781	NO	protein_coding
CSGALNACT1	-1.01204	3.12138	12.3817	0.00043356	0.00277377	2.55693	DOWN	protein_coding
TCF7	0.597573	2.73091	12.3802	0.000433903	0.00277386	2.55692	NO	protein_coding
SAV1	-0.526831	5.66546	12.3801	0.000433934	0.00277386	2.55692	NO	protein_coding
TSNAX	-0.294143	5.37375	12.3769	0.000434688	0.00277602	2.55658	NO	protein_coding
HSP90B1	0.387472	9.85952	12.3767	0.000434722	0.00277602	2.55658	NO	protein_coding
IL16	-2.10279	3.15602	12.3763	0.000434813	0.00277602	2.55658	DOWN	protein_coding
IL18R1	-1.83333	0.119988	12.3679	0.000436772	0.00278737	2.55481	DOWN	protein_coding
UQCC3	0.688107	2.0915	12.3668	0.000437043	0.00278794	2.55472	NO	protein_coding
IFT22	-0.47334	3.12298	12.3562	0.000439518	0.00280257	2.55244	NO	protein_coding
ITSN1	0.307474	6.10543	12.352	0.000440503	0.00280768	2.55165	NO	protein_coding
FGL2	-3.39821	3.21926	12.3462	0.000441888	0.00281534	2.55047	DOWN	protein_coding
TSKU	-0.716222	4.48068	12.3399	0.000443367	0.00282243	2.54938	NO	protein_coding
MYO1B	-0.46508	7.82889	12.3368	0.000444122	0.00282607	2.54882	NO	protein_coding
GLUL	-0.407835	6.43325	12.3264	0.000446592	0.00284061	2.54659	NO	protein_coding
RAB2A	-0.317125	7.01494	12.325	0.000446928	0.00284157	2.54644	NO	protein_coding
OLR1	-1.102	4.4456	12.3223	0.000447573	0.0028445	2.54599	DOWN	protein_coding
EEF2	-0.305681	11.2982	12.3165	0.000448967	0.00285217	2.54482	NO	protein_coding
FAM72B	1.09906	1.01087	12.3151	0.00044931	0.00285317	2.54467	UP	protein_coding
CNOT8	-0.377451	4.98576	12.3111	0.000450279	0.00285815	2.54392	NO	protein_coding
CYC1	0.445331	5.22095	12.2963	0.000453864	0.00287971	2.54065	NO	protein_coding
[truncated: 10,892 more rows]

## Sheet: Table S4
Table S3: Differential mRNA expression for fibroblast treated with Met5A 100k EV vs MSTO 100k EV
	logFC	logCPM	LR	PValue	FDR	adj-P	diffexp	gene.type	label
POTEE	4.5449	1.81558	226.352	3.72336e-51	1.78954e-48	47.7473	UP	protein_coding	POTEE
PRR33	12.3902	-0.940231	216.649	4.86871e-49	2.20237e-46	45.6571	UP	protein_coding	PRR33
PFKFB4	3.31895	4.4192	200.012	2.07561e-45	7.60067e-43	42.1191	UP	protein_coding	PFKFB4
TBX3	1.18546	7.27646	159.393	1.5359e-36	3.32706e-34	33.4779	UP	protein_coding	TBX3
NMRK2	10.9173	-2.26177	142.364	8.09666e-33	1.50032e-30	29.8238	UP	protein_coding	NMRK2
NDRG1	3.81638	6.60485	141.648	1.16096e-32	2.12567e-30	29.6725	UP	protein_coding	NDRG1
FKBP1C	2.98882	1.71077	140.031	2.62069e-32	4.63291e-30	29.3341	UP	protein_coding	FKBP1C
C1QL2	11.3123	-1.92036	138.882	4.6751e-32	8.07899e-30	29.0926	UP	protein_coding	C1QL2
ABCC8	11.0832	-2.0726	133.941	5.62736e-31	8.92255e-29	28.0495	UP	protein_coding
BAG2	-1.59861	6.10889	133.649	6.52028e-31	1.02328e-28	27.99	DOWN	protein_coding	BAG2
ZC3H11B	3.39812	0.807098	129.172	6.21935e-30	9.10986e-28	27.0405	UP	protein_coding
GGH	2.06198	4.26649	127.613	1.36417e-29	1.96084e-27	26.7076	UP	protein_coding
TBX5	1.54897	5.03195	124.844	5.50452e-29	7.42627e-27	26.1292	UP	protein_coding
PGAM4	3.98938	0.148296	122.428	1.86075e-28	2.44601e-26	25.6115	UP	protein_coding
EIF5AL1	2.70164	1.51287	122.217	2.06934e-28	2.69715e-26	25.5691	UP	protein_coding
ACTA1	3.3749	0.769528	119.517	8.06891e-28	1.04286e-25	24.9818	UP	protein_coding
ACSL4	-1.27089	7.76628	118.653	1.24737e-27	1.5855e-25	24.7998	DOWN	protein_coding	ACSL4
CATSPERZ	10.9939	0.0198026	118.408	1.41128e-27	1.7662e-25	24.753	UP	protein_coding
TUFT1	-1.93056	5.02979	114.327	1.10523e-26	1.27808e-24	23.8934	DOWN	protein_coding	TUFT1
ZRSR2	1.74184	1.84073	112.608	2.62902e-26	2.93002e-24	23.5331	UP	protein_coding
TCAF2	3.14707	2.18144	112.551	2.70659e-26	2.99478e-24	23.5236	UP	protein_coding
TK1	3.13278	4.56915	111.682	4.19566e-26	4.60924e-24	23.3364	UP	protein_coding
PIP5K1A	-0.911081	6.60185	111.34	4.98479e-26	5.4373e-24	23.2646	NO	protein_coding
HTR1A	9.77304	-3.14967	110.921	6.15785e-26	6.66956e-24	23.1759	UP	protein_coding
PITPNC1	1.79899	3.63675	110.84	6.41563e-26	6.90017e-24	23.1611	UP	protein_coding
PRSS53	2.08894	3.04277	110.453	7.79853e-26	8.32926e-24	23.0794	UP	protein_coding
FEZF2	10.2417	-2.7875	109.761	1.10551e-25	1.16457e-23	22.9338	UP	protein_coding
KDM3A	1.70023	5.51674	109.133	1.51786e-25	1.58807e-23	22.7991	UP	protein_coding
ENO2	2.5331	5.52467	107.416	3.60901e-25	3.67593e-23	22.4346	UP	protein_coding
ASPG	11.2481	-1.97627	105.684	8.65037e-25	8.52838e-23	22.0691	UP	protein_coding
GLUD2	2.80805	0.468269	102.573	4.1584e-24	3.82971e-22	21.4168	UP	protein_coding
HSPB7	2.1862	3.75438	102.028	5.47295e-24	4.9807e-22	21.3027	UP	protein_coding
MFSD2B	4.15084	-0.790973	99.486	1.97554e-23	1.7462e-21	20.7579	UP	protein_coding
SLC5A3	2.02876	6.70617	98.5078	3.23753e-23	2.81317e-21	20.5508	UP	protein_coding
KCNV2	9.48571	-3.23762	96.9631	7.06312e-23	6.0017e-21	20.2217	UP	protein_coding
LRRC26	9.47647	-3.2834	95.9507	1.17782e-22	9.84505e-21	20.0068	UP	protein_coding
ARHGAP29	-1.58169	6.81106	94.9778	1.92533e-22	1.60063e-20	19.7957	DOWN	protein_coding	ARHGAP29
ANKZF1	1.65932	4.42282	94.6124	2.31565e-22	1.90453e-20	19.7202	UP	protein_coding
POTEI	3.49595	0.20576	93.6315	3.80088e-22	3.07671e-20	19.5119	UP	protein_coding
PDK1	2.26512	5.7969	93.5101	4.04137e-22	3.25425e-20	19.4875	UP	protein_coding
APLN	5.68467	-0.552153	93.2076	4.7087e-22	3.77186e-20	19.4234	UP	protein_coding
NYX	10.4712	-2.62122	92.2981	7.45569e-22	5.88044e-20	19.2306	UP	protein_coding
RASSF3	-1.4101	6.56053	91.658	1.03029e-21	8.00292e-20	19.0968	DOWN	protein_coding	RASSF3
PPFIA4	3.57087	2.48168	90.5101	1.84039e-21	1.42237e-19	18.847	UP	protein_coding
CASS4	-2.91253	4.76094	89.6676	2.81731e-21	2.14506e-19	18.6686	DOWN	protein_coding	CASS4
RNF41	-0.877778	5.90497	89.1257	3.70502e-21	2.80705e-19	18.5517	NO	protein_coding
SFRP4	9.72979	-3.1755	88.6147	4.79712e-21	3.61665e-19	18.4417	UP	protein_coding
FIBIN	-2.43996	5.09853	88.5511	4.95386e-21	3.7166e-19	18.4299	DOWN	protein_coding	FIBIN
STK35	0.851539	5.52519	86.7903	1.2066e-20	8.92191e-19	18.0495	NO	protein_coding
GYS1	1.59273	6.41725	86.5152	1.38664e-20	1.01555e-18	17.9933	UP	protein_coding
SERPINB6	0.82349	6.16492	85.7338	2.05866e-20	1.4935e-18	17.8258	NO	protein_coding
USP53	-2.48644	6.86146	84.9439	3.06952e-20	2.21094e-18	17.6554	DOWN	protein_coding	USP53
TRIM35	-1.10334	4.87211	84.6257	3.60547e-20	2.56723e-18	17.5905	DOWN	protein_coding
HILPDA	2.94754	2.90605	83.2098	7.37916e-20	5.1587e-18	17.2875	UP	protein_coding
NR4A3	3.03875	0.72328	83.013	8.15136e-20	5.67275e-18	17.2462	UP	protein_coding
UGCG	-2.12185	8.46089	82.7165	9.4707e-20	6.56123e-18	17.183	DOWN	protein_coding
NR4A2	2.49127	0.741769	82.2414	1.20439e-19	8.16012e-18	17.0883	UP	protein_coding
ANKRD37	4.10347	-0.133157	82.0549	1.32361e-19	8.92853e-18	17.0492	UP	protein_coding
RTL10	-1.25551	5.13844	81.8745	1.45005e-19	9.73877e-18	17.0115	DOWN	protein_coding
MB21D2	-1.09182	4.47507	80.7638	2.54374e-19	1.67191e-17	16.7768	DOWN	protein_coding
KCNN3	4.75455	0.000430273	80.1764	3.42437e-19	2.24114e-17	16.6495	UP	protein_coding
KBTBD13	8.05275	-3.18498	80.0401	3.66886e-19	2.38089e-17	16.6233	UP	protein_coding
CD79A	4.1179	-1.78194	79.1295	5.81681e-19	3.7432e-17	16.4268	UP	protein_coding
DNER	6.7053	1.05368	78.4956	8.01759e-19	5.08837e-17	16.2934	UP	protein_coding
DCUN1D3	-0.89631	5.83989	78.4902	8.03949e-19	5.08837e-17	16.2934	NO	protein_coding
SYNM	1.98096	3.61	78.3802	8.49981e-19	5.35707e-17	16.2711	UP	protein_coding
RORA	1.95299	4.25256	78.045	1.00722e-18	6.27167e-17	16.2026	UP	protein_coding
ZNF561	-0.799942	5.23896	77.558	1.2888e-18	7.96051e-17	16.0991	NO	protein_coding
MRPS6	1.58538	4.45687	77.5311	1.30646e-18	8.03736e-17	16.0949	UP	protein_coding
NEDD9	-2.30107	5.5509	76.6427	2.04864e-18	1.24538e-16	15.9047	DOWN	protein_coding
FAM13A	1.95923	4.8625	76.4242	2.28828e-18	1.38014e-16	15.8601	UP	protein_coding
ZMIZ1	1.20435	7.96059	75.9414	2.92214e-18	1.75557e-16	15.7556	UP	protein_coding
C1orf198	-1.81292	7.18959	75.733	3.24734e-18	1.94335e-16	15.7114	DOWN	protein_coding
TFRC	-1.21349	8.27925	74.7391	5.37204e-18	3.19004e-16	15.4962	DOWN	protein_coding
NFIL3	1.47674	4.81213	74.5518	5.90691e-18	3.48078e-16	15.4583	UP	protein_coding
ERO1A	1.37902	6.91047	73.9157	8.15242e-18	4.73148e-16	15.325	UP	protein_coding
EIF3CL	2.73214	5.96654	73.4586	1.0277e-17	5.94211e-16	15.2261	UP	protein_coding
NARF	0.981711	3.9967	72.1373	2.00728e-17	1.14766e-15	14.9402	NO	protein_coding
RAB33B	-1.25452	3.61722	72.0887	2.05735e-17	1.17193e-15	14.9311	DOWN	protein_coding
ATOH8	2.65188	3.47259	71.904	2.25931e-17	1.28222e-15	14.892	UP	protein_coding
CHD1L	0.950794	4.93385	71.8709	2.29749e-17	1.2991e-15	14.8864	NO	protein_coding
MT2A	2.91027	8.15505	71.712	2.49014e-17	1.40287e-15	14.853	UP	protein_coding
UCK2	-1.28072	5.88418	71.5385	2.71901e-17	1.52622e-15	14.8164	DOWN	protein_coding
EIF5A2	-1.20372	5.23125	70.8925	3.77223e-17	2.07203e-15	14.6836	DOWN	protein_coding
FAM162A	1.82525	3.68138	70.6149	4.34236e-17	2.37671e-15	14.624	UP	protein_coding
ARFGEF3	4.05235	0.125047	70.3778	4.89687e-17	2.6519e-15	14.5764	UP	protein_coding
NFKBIE	-1.59319	3.57991	70.3145	5.05637e-17	2.71913e-15	14.5656	DOWN	protein_coding
PALLD	-1.06841	9.44937	69.8997	6.23979e-17	3.34383e-15	14.4758	DOWN	protein_coding
PFKFB3	1.6984	5.64623	69.8081	6.5364e-17	3.49062e-15	14.4571	UP	protein_coding
INSIG2	1.41039	3.48338	69.6462	7.0956e-17	3.77614e-15	14.423	UP	protein_coding
KIF5A	3.27143	0.775239	69.6063	7.24048e-17	3.83995e-15	14.4157	UP	protein_coding
FILIP1L	-1.24563	6.72568	69.3207	8.3688e-17	4.4231e-15	14.3543	DOWN	protein_coding
KRTAP1.5	-3.10407	2.85808	68.8502	1.06236e-16	5.57647e-15	14.2536	DOWN	protein_coding
IL21R	4.81646	0.68735	68.1222	1.53674e-16	8.01187e-15	14.0963	UP	protein_coding
BNIP3	2.13073	6.2182	67.4226	2.1912e-16	1.1347e-14	13.9451	UP	protein_coding
SPOCK2	5.28543	-1.92476	67.3978	2.21895e-16	1.14522e-14	13.9411	UP	protein_coding
FHL2	-1.2281	6.82592	67.3252	2.30216e-16	1.18419e-14	13.9266	DOWN	protein_coding
YTHDF2	-0.685039	6.23924	66.9436	2.79394e-16	1.43236e-14	13.8439	NO	protein_coding
SYNPO2	-2.7453	5.52804	66.7554	3.07378e-16	1.57059e-14	13.8039	DOWN	protein_coding
ARL5B	-1.00951	5.76773	66.1793	4.11706e-16	2.08978e-14	13.6799	DOWN	protein_coding
PRR11	2.42542	5.54881	66.0075	4.49213e-16	2.27266e-14	13.6435	UP	protein_coding
PTTG1	2.51177	3.85613	65.5633	5.62759e-16	2.83778e-14	13.547	UP	protein_coding
METTL8	-0.845671	4.81679	65.4641	5.91814e-16	2.97454e-14	13.5266	NO	protein_coding
SCNN1A	5.28159	-1.57548	64.9462	7.69719e-16	3.83116e-14	13.4167	UP	protein_coding
PRICKLE1	-2.24588	5.78153	64.913	7.82798e-16	3.88369e-14	13.4108	DOWN	protein_coding
PVR	-1.35965	7.73431	64.2585	1.09122e-15	5.36197e-14	13.2707	DOWN	protein_coding
SPC24	2.86597	3.33654	64.2331	1.10534e-15	5.41405e-14	13.2665	UP	protein_coding
HK2	1.76652	6.00877	64.1853	1.13253e-15	5.52962e-14	13.2573	UP	protein_coding
VCL	-0.847576	10.0063	64.0718	1.19967e-15	5.81625e-14	13.2354	NO	protein_coding
DDX41	1.04745	5.08872	64.067	1.20258e-15	5.81625e-14	13.2354	UP	protein_coding
GAL3ST1	6.58746	-2.43739	63.9689	1.26401e-15	6.09419e-14	13.2151	UP	protein_coding
ETV1	1.52591	4.54989	63.8743	1.32616e-15	6.354e-14	13.197	UP	protein_coding
TWSG1	-1.73577	8.39831	63.8023	1.37554e-15	6.57011e-14	13.1824	DOWN	protein_coding
ARNT2	-1.64659	5.84318	63.6889	1.45703e-15	6.91638e-14	13.1601	DOWN	protein_coding
CIT	2.77047	5.27628	63.3982	1.68871e-15	7.99152e-14	13.0974	UP	protein_coding
TNFRSF10B	-0.734345	7.71311	63.278	1.79498e-15	8.44245e-14	13.0735	NO	protein_coding
CENPF	3.49046	6.24288	63.0561	2.00899e-15	9.36309e-14	13.0286	UP	protein_coding
STC1	3.36077	7.08022	62.8485	2.23237e-15	1.03415e-13	12.9854	UP	protein_coding
SH3D21	2.26576	4.49978	62.8309	2.25234e-15	1.04027e-13	12.9829	UP	protein_coding
ZNF121	-1.03548	6.08578	62.2851	2.9716e-15	1.36428e-13	12.8651	DOWN	protein_coding
CDR2	-1.57655	5.13062	62.0107	3.41593e-15	1.55896e-13	12.8072	DOWN	protein_coding
ABCA3	2.6571	0.176142	61.9362	3.54771e-15	1.61431e-13	12.792	UP	protein_coding
GPR146	4.4238	-0.193125	61.7734	3.85336e-15	1.73521e-13	12.7606	UP	protein_coding
LDHA	1.73327	9.06395	61.7708	3.85853e-15	1.73521e-13	12.7606	UP	protein_coding
NUFIP2	-0.784843	7.81462	61.7543	3.8911e-15	1.74476e-13	12.7583	NO	protein_coding
F2RL2	-1.76166	7.79528	61.7337	3.93194e-15	1.75794e-13	12.755	DOWN	protein_coding
YTHDF3	-0.544593	6.97293	61.5443	4.32896e-15	1.92984e-13	12.7145	NO	protein_coding
ID3	3.81088	4.53304	61.5167	4.39004e-15	1.95141e-13	12.7097	UP	protein_coding
TPI1	0.981034	8.22201	61.4552	4.52931e-15	2.00442e-13	12.698	NO	protein_coding
NMD3	-0.666806	5.86665	61.2799	4.95102e-15	2.18185e-13	12.6612	NO	protein_coding
ISOC1	-1.49166	3.17855	60.9799	5.76603e-15	2.52654e-13	12.5975	DOWN	protein_coding
CASP3	-1.3838	5.77627	60.8437	6.17914e-15	2.69986e-13	12.5687	DOWN	protein_coding
ID2	2.5704	4.24535	60.517	7.29448e-15	3.16918e-13	12.4991	UP	protein_coding
MEF2C	1.5757	2.96917	60.41	7.70224e-15	3.33691e-13	12.4767	UP	protein_coding
TMEM217	-1.95413	1.4644	60.2633	8.29785e-15	3.58486e-13	12.4455	DOWN	protein_coding
ARL15	-1.12016	3.88849	60.2418	8.38912e-15	3.61414e-13	12.442	DOWN	protein_coding
DAB2	-1.6464	9.06857	60.2124	8.51553e-15	3.65835e-13	12.4367	DOWN	protein_coding
KDM4C	1.08991	4.37497	60.1374	8.84613e-15	3.77927e-13	12.4226	UP	protein_coding
ZNHIT6	-1.14887	5.46455	59.877	1.00973e-14	4.30185e-13	12.3663	DOWN	protein_coding
NT5C2	-0.753755	6.97789	59.6353	1.14167e-14	4.83717e-13	12.3154	NO	protein_coding
SEC23IP	-0.670284	6.55482	59.5237	1.2083e-14	5.10541e-13	12.292	NO	protein_coding
RELB	-1.37451	4.42665	59.2065	1.41962e-14	5.96549e-13	12.2244	DOWN	protein_coding
AREG	4.56769	-0.381123	59.1778	1.44046e-14	6.0366e-13	12.2192	UP	protein_coding
KIF1A	6.42566	-2.33444	59.151	1.46027e-14	6.10297e-13	12.2145	UP	protein_coding
SAP30	1.70606	2.06637	58.8744	1.68066e-14	7.00501e-13	12.1546	UP	protein_coding
TRPM1	7.87291	-3.00552	58.4795	2.05416e-14	8.51564e-13	12.0698	UP	protein_coding
CHIC2	-0.979136	4.18454	57.9801	2.64782e-14	1.08886e-12	11.963	NO	protein_coding
MYH7B	5.09238	-1.75291	57.8431	2.83888e-14	1.16432e-12	11.9339	UP	protein_coding
GSDMA	6.00008	-2.72467	57.3122	3.71837e-14	1.50893e-12	11.8213	UP	protein_coding
PCNT	1.31558	5.6743	57.0143	4.32649e-14	1.7465e-12	11.7578	UP	protein_coding
CENPW	2.75656	1.60915	56.6209	5.28482e-14	2.12776e-12	11.6721	UP	protein_coding
KIAA0232	-0.712129	6.03207	56.417	5.86213e-14	2.35403e-12	11.6282	NO	protein_coding
GPI	0.876939	7.56743	56.0321	7.1296e-14	2.84813e-12	11.5454	NO	protein_coding
ALPK2	-1.12227	7.31565	55.7345	8.29501e-14	3.29657e-12	11.4819	DOWN	protein_coding
TGFBRAP1	-0.750506	5.11425	55.4687	9.49596e-14	3.76412e-12	11.4243	NO	protein_coding
SMAD6	1.91632	3.85304	55.3089	1.02999e-13	4.0723e-12	11.3902	UP	protein_coding
RPS27AP5	2.5686	-0.0592752	55.2676	1.05186e-13	4.12754e-12	11.3843	UP	protein_coding
PHLDB2	-1.92597	5.35454	55.2674	1.05201e-13	4.12754e-12	11.3843	DOWN	protein_coding
ANGPTL4	4.78196	3.64643	55.0043	1.20267e-13	4.67098e-12	11.3306	UP	protein_coding
ENTPD7	-1.43125	5.85552	54.951	1.23573e-13	4.78728e-12	11.3199	DOWN	protein_coding
DRAP1	1.24831	6.73777	54.8488	1.30167e-13	5.03006e-12	11.2984	UP	protein_coding
CCNB2	2.97353	3.49152	54.732	1.3814e-13	5.32478e-12	11.2737	UP	protein_coding
ID1	4.25	4.39203	54.6943	1.40812e-13	5.41424e-12	11.2665	UP	protein_coding
HMGB2	2.34505	4.38369	54.6622	1.43133e-13	5.48972e-12	11.2604	UP	protein_coding
RIMS2	0.979719	3.46306	54.5975	1.47921e-13	5.65926e-12	11.2472	NO	protein_coding
QSOX1	-1.69343	10.7728	54.4948	1.55861e-13	5.94824e-12	11.2256	DOWN	protein_coding
DRAM1	-1.43777	6.53362	54.405	1.63147e-13	6.21091e-12	11.2068	DOWN	protein_coding
NUFIP1	-1.242	3.82618	54.3806	1.65183e-13	6.26858e-12	11.2028	DOWN	protein_coding
PDK3	2.48436	1.35973	54.3771	1.65478e-13	6.26858e-12	11.2028	UP	protein_coding
CCL2	-3.88759	5.17768	54.1421	1.86507e-13	7.03057e-12	11.153	DOWN	protein_coding
C13orf46	1.78849	2.74223	54.0866	1.91847e-13	7.19889e-12	11.1427	UP	protein_coding
SYTL3	2.12043	1.94322	54.086	1.91908e-13	7.19889e-12	11.1427	UP	protein_coding
SLC37A2	2.86246	1.74264	53.9492	2.05738e-13	7.69891e-12	11.1136	UP	protein_coding
CDH11	-1.16241	8.34091	53.9314	2.07618e-13	7.7504e-12	11.1107	DOWN	protein_coding
DPF3	-1.73977	5.28625	53.8777	2.13365e-13	7.90737e-12	11.102	DOWN	protein_coding
CDCA3	3.44901	3.19047	53.7349	2.29448e-13	8.48296e-12	11.0715	UP	protein_coding
EGLN1	1.36199	5.52172	53.6134	2.44087e-13	8.98101e-12	11.0467	UP	protein_coding
SAMD1	0.950356	4.71758	53.4214	2.69148e-13	9.83255e-12	11.0073	NO	protein_coding
NSG1	-2.4475	2.84355	53.2626	2.91814e-13	1.06353e-11	10.9733	DOWN	protein_coding
CEP152	2.01345	3.24874	53.1748	3.05141e-13	1.10947e-11	10.9549	UP	protein_coding
RNASEH2A	2.09387	2.62454	53.1071	3.15853e-13	1.14571e-11	10.9409	UP	protein_coding
AZIN1	-0.774059	7.51647	53.0093	3.31969e-13	1.19852e-11	10.9214	NO	protein_coding
FUT11	1.12321	4.92702	52.9724	3.38265e-13	1.21839e-11	10.9142	UP	protein_coding
ZNF106	-1.11779	8.37277	52.8777	3.54968e-13	1.27259e-11	10.8953	DOWN	protein_coding
KIF20A	3.28208	4.79302	52.8433	3.61254e-13	1.29211e-11	10.8887	UP	protein_coding
ZNF275	-0.718331	5.25151	52.8127	3.66921e-13	1.30934e-11	10.8829	NO	protein_coding
VGLL3	-1.79487	7.87716	52.6159	4.05584e-13	1.44395e-11	10.8404	DOWN	protein_coding
PLIN2	1.56893	6.26994	52.5843	4.12179e-13	1.46404e-11	10.8344	UP	protein_coding
C5orf22	-0.908049	4.65137	52.5656	4.16116e-13	1.47462e-11	10.8313	NO	protein_coding
KAT6B	0.786272	6.02253	52.5172	4.26507e-13	1.50797e-11	10.8216	NO	protein_coding
CENPE	3.05038	5.03556	52.3732	4.58934e-13	1.6189e-11	10.7908	UP	protein_coding
NPFFR1	5.87842	-2.14895	52.2391	4.91375e-13	1.72937e-11	10.7621	UP	protein_coding
HDHD5	1.17107	3.41362	52.2292	4.93873e-13	1.73419e-11	10.7609	UP	protein_coding
TCF7	1.3249	2.73091	52.0649	5.3696e-13	1.87692e-11	10.7266	UP	protein_coding
FHIP1A	2.16695	0.314957	51.9539	5.682e-13	1.98161e-11	10.703	UP	protein_coding
CDV3	-0.857444	8.34193	51.9215	5.77657e-13	2.01004e-11	10.6968	NO	protein_coding
PRNP	-0.907778	8.14934	51.8346	6.03772e-13	2.09144e-11	10.6796	NO	protein_coding
USP46	-0.840179	5.44983	51.76	6.27164e-13	2.16315e-11	10.6649	NO	protein_coding
ALAS1	-1.07234	5.55911	51.4402	7.38132e-13	2.53404e-11	10.5962	DOWN	protein_coding
CTTNBP2NL	-0.627926	6.48716	51.3042	7.91074e-13	2.70974e-11	10.5671	NO	protein_coding
BRIX1	-1.32291	4.78804	51.1796	8.42896e-13	2.86832e-11	10.5424	DOWN	protein_coding
STAT1	-0.941446	7.86272	51.1794	8.42966e-13	2.86832e-11	10.5424	NO	protein_coding
FOXM1	2.64896	4.86802	51.1202	8.68801e-13	2.9497e-11	10.5302	UP	protein_coding
BCOR	0.80017	5.09769	50.9907	9.28059e-13	3.14395e-11	10.5025	NO	protein_coding
PGK1	1.27453	7.89335	50.7424	1.05322e-12	3.56011e-11	10.4485	UP	protein_coding
PPP1R3G	2.29907	1.00049	50.7036	1.07423e-12	3.62316e-11	10.4409	UP	protein_coding
TMEM107	1.16864	2.66329	50.5929	1.13655e-12	3.81664e-11	10.4183	UP	protein_coding
KIAA1549L	2.15836	5.19527	50.273	1.3378e-12	4.47289e-11	10.3494	UP	protein_coding
E2F7	2.66178	5.32374	50.1604	1.41676e-12	4.72663e-11	10.3254	UP	protein_coding
C4B	-3.43371	2.44695	50.1392	1.43217e-12	4.76771e-11	10.3217	DOWN	protein_coding
ZNF395	2.15725	4.10836	50.0973	1.46307e-12	4.86005e-11	10.3134	UP	protein_coding
PRC1	3.08308	5.05801	50.0031	1.53507e-12	5.07472e-11	10.2946	UP	protein_coding
HOXB6	1.36212	4.28016	49.9998	1.5376e-12	5.07472e-11	10.2946	UP	protein_coding
PIMREG	3.4592	2.63019	49.8029	1.69989e-12	5.59835e-11	10.2519	UP	protein_coding
NFATC2	2.78849	0.388846	49.7316	1.76286e-12	5.79333e-11	10.2371	UP	protein_coding
ESPN	5.94878	-2.86346	49.7257	1.76814e-12	5.79829e-11	10.2367	UP	protein_coding
PFKP	0.936142	7.32951	49.6727	1.81658e-12	5.93185e-11	10.2268	NO	protein_coding
XPO6	-0.713511	7.54318	49.6589	1.8294e-12	5.96104e-11	10.2247	NO	protein_coding
BCL11B	5.81409	-2.25386	49.6495	1.83817e-12	5.97696e-11	10.2235	UP	protein_coding
CDC42EP2	-1.2944	5.00384	49.5648	1.91926e-12	6.22748e-11	10.2057	DOWN	protein_coding
TGFB2	-2.79438	5.28605	49.3837	2.10484e-12	6.81526e-11	10.1665	DOWN	protein_coding
PYGO1	-0.883932	5.00098	49.3737	2.11567e-12	6.83593e-11	10.1652	NO	protein_coding
NCAM1	7.59367	-2.45674	49.1999	2.31165e-12	7.45351e-11	10.1276	UP	protein_coding
KLHL42	-0.645966	5.79371	49.1309	2.39439e-12	7.70412e-11	10.1133	NO	protein_coding
APOBEC3B	3.09637	2.66784	49.0917	2.44275e-12	7.84331e-11	10.1055	UP	protein_coding
PLPP5	-0.911051	4.73009	49.0424	2.50486e-12	8.026e-11	10.0955	NO	protein_coding
NRGN	1.71262	2.58821	49.0382	2.51028e-12	8.02664e-11	10.0955	UP	protein_coding
AMOTL1	-0.81353	7.58181	48.9372	2.64288e-12	8.4331e-11	10.074	NO	protein_coding
MEF2D	0.974183	6.52867	48.8637	2.74385e-12	8.7191e-11	10.0595	NO	protein_coding
SYN2	3.04908	-2.1655	48.844	2.77158e-12	8.77897e-11	10.0566	UP	protein_coding
SAMD11	3.74442	1.98372	48.8422	2.77411e-12	8.77897e-11	10.0566	UP	protein_coding
EXTL2	-0.833386	5.25847	48.8375	2.78066e-12	8.78164e-11	10.0564	NO	protein_coding
ITGA1	-1.3347	7.79238	48.7784	2.86577e-12	9.03187e-11	10.0442	DOWN	protein_coding
ZSWIM5	3.50792	-0.649867	48.7245	2.94564e-12	9.25157e-11	10.0338	UP	protein_coding
CDKN3	2.89368	2.12984	48.7233	2.94751e-12	9.25157e-11	10.0338	UP	protein_coding
CDC42EP3	-1.1831	8.99605	48.6678	3.032e-12	9.4974e-11	10.0224	DOWN	protein_coding
ANO7	2.78586	0.0639933	48.5635	3.19769e-12	9.99529e-11	10.0002	UP	protein_coding
CFAP99	7.1001	-2.71091	48.5596	3.20395e-12	9.99529e-11	10.0002	UP	protein_coding
CD68	1.19495	5.61587	48.4446	3.39747e-12	1.05775e-10	9.97561	UP	protein_coding
LRP11	0.806911	6.49944	48.3907	3.49228e-12	1.08289e-10	9.96542	NO	protein_coding
IQGAP3	3.45237	5.1332	48.3654	3.53754e-12	1.09472e-10	9.9607	UP	protein_coding
MYO9A	0.681024	6.26825	48.334	3.59469e-12	1.11017e-10	9.95461	NO	protein_coding
TMEM98	-0.796552	5.78595	48.278	3.69886e-12	1.14005e-10	9.94308	NO	protein_coding
CAMK1G	2.39782	1.44784	48.1144	4.0206e-12	1.23674e-10	9.90772	UP	protein_coding
CEP55	3.44365	4.10816	48.0948	4.06111e-12	1.2467e-10	9.90424	UP	protein_coding
ATMIN	-0.748368	5.82306	48.0423	4.1712e-12	1.27795e-10	9.89349	NO	protein_coding
RRAS2	-0.865202	6.53631	47.9789	4.30825e-12	1.3147e-10	9.88117	NO	protein_coding
SLFN12	-1.17065	5.49581	47.6804	5.01691e-12	1.5219e-10	9.81762	DOWN	protein_coding
BHLHE40	1.93598	5.40603	47.5541	5.35062e-12	1.61993e-10	9.7905	UP	protein_coding
ANKMY1	1.27285	2.70058	47.4634	5.60407e-12	1.69333e-10	9.77126	UP	protein_coding
SHCBP1	3.2162	4.32415	47.4592	5.61602e-12	1.69362e-10	9.77118	UP	protein_coding
BUB1	3.25772	4.54236	47.3933	5.80811e-12	1.7413e-10	9.75913	UP	protein_coding
PCSK5	-1.38877	2.75293	47.2948	6.10732e-12	1.82744e-10	9.73816	DOWN	protein_coding
H3C3	3.51056	3.99635	47.2462	6.26067e-12	1.86969e-10	9.72823	UP	protein_coding
KCNJ2	-3.04305	4.78594	47.2066	6.3884e-12	1.90231e-10	9.72072	DOWN	protein_coding
SLC4A8	1.16311	3.8448	47.2047	6.39463e-12	1.90231e-10	9.72072	UP	protein_coding
TLK1	-0.811553	6.45994	47.1397	6.6104e-12	1.9627e-10	9.70715	NO	protein_coding
NYAP1	1.90757	0.580178	47.0977	6.75335e-12	1.99803e-10	9.6994	UP	protein_coding
LATS2	-1.03163	6.86213	47.0699	6.8499e-12	2.0221e-10	9.6942	DOWN	protein_coding
MKI67	3.6478	6.88137	47.0281	6.9978e-12	2.0618e-10	9.68575	UP	protein_coding
CCNJ	-1.4931	3.47491	46.9124	7.42321e-12	2.1788e-10	9.66178	DOWN	protein_coding
CPEB2	-1.32755	6.73084	46.8292	7.74494e-12	2.2689e-10	9.64418	DOWN	protein_coding
MMD	-2.14835	4.53229	46.8211	7.77723e-12	2.27403e-10	9.6432	DOWN	protein_coding
PEX13	-0.575268	4.70499	46.7398	8.10678e-12	2.36589e-10	9.62601	NO	protein_coding
CENPH	2.26694	1.83864	46.6556	8.46246e-12	2.46501e-10	9.60818	UP	protein_coding
H3C2	3.65358	4.59502	46.5642	8.86673e-12	2.57789e-10	9.58874	UP	protein_coding
ATP6V1A	-0.769558	7.28424	46.5501	8.93039e-12	2.58938e-10	9.5868	NO	protein_coding
PRKCI	-1.04152	6.74312	46.548	8.93993e-12	2.58938e-10	9.5868	DOWN	protein_coding
MAFA	3.486	-2.30909	46.4767	9.27133e-12	2.68032e-10	9.57181	UP	protein_coding
RASGRP1	-4.22852	0.770945	46.3888	9.69705e-12	2.79289e-10	9.55395	DOWN	protein_coding
LIFR	-1.42302	6.18183	46.3097	1.00964e-11	2.90024e-10	9.53757	DOWN	protein_coding
HAPSTR1	0.619448	8.14745	46.3075	1.01075e-11	2.90024e-10	9.53757	NO	protein_coding
RAD1	-0.900514	4.78485	46.182	1.07765e-11	3.08644e-10	9.51054	NO	protein_coding
C2orf92	2.37584	0.682319	46.1075	1.11939e-11	3.20005e-10	9.49484	UP	protein_coding
ADRB1	12.5073	-0.71317	46.0627	1.1453e-11	3.26803e-10	9.48571	UP	protein_coding
HNRNPA1L3	1.307	2.20005	45.8307	1.28925e-11	3.66518e-10	9.4359	UP	protein_coding
H2AC16	3.48695	3.37324	45.6902	1.38515e-11	3.91698e-10	9.40705	UP	protein_coding
SMC2	1.40278	5.15375	45.6897	1.38546e-11	3.91698e-10	9.40705	UP	protein_coding
HEBP1	-1.16925	5.42866	45.6797	1.39258e-11	3.92988e-10	9.40562	DOWN	protein_coding
GADD45B	1.22486	4.33232	45.4257	1.5854e-11	4.46584e-10	9.3501	UP	protein_coding
TACC3	2.62137	4.85663	45.4013	1.60528e-11	4.51357e-10	9.34548	UP	protein_coding
TP53RK	-0.786457	4.22505	45.3715	1.6299e-11	4.57443e-10	9.33966	NO	protein_coding
TFB1M	1.08421	2.81682	45.3276	1.66682e-11	4.66953e-10	9.33073	UP	protein_coding
STX6	-0.662778	5.81922	45.3226	1.67112e-11	4.67306e-10	9.3304	NO	protein_coding
PLEKHN1	2.14511	2.76849	45.3161	1.67666e-11	4.68003e-10	9.32975	UP	protein_coding
SMAD7	2.35361	4.17612	45.307	1.68449e-11	4.69337e-10	9.32852	UP	protein_coding
GPRC5A	-2.51995	6.84812	45.1904	1.78776e-11	4.9721e-10	9.30346	DOWN	protein_coding
H2AC13	3.25249	3.89655	45.0365	1.93401e-11	5.36914e-10	9.2701	UP	protein_coding
CAVIN3	0.817994	6.53037	44.8657	2.11022e-11	5.84779e-10	9.23301	NO	protein_coding
SPAG5	3.05255	4.47729	44.8337	2.14496e-11	5.93335e-10	9.2267	UP	protein_coding
RGPD3	1.88052	0.817234	44.7874	2.19635e-11	6.06461e-10	9.2172	UP	protein_coding
CENPU	2.55927	2.65223	44.6837	2.31582e-11	6.37163e-10	9.19575	UP	protein_coding
STK17B	-1.10509	6.92791	44.6789	2.3215e-11	6.37583e-10	9.19546	DOWN	protein_coding
ZNF292	0.799851	6.33713	44.6535	2.35173e-11	6.44735e-10	9.19062	NO	protein_coding
ABHD5	-0.905063	5.14155	44.6461	2.36064e-11	6.46026e-10	9.18975	NO	protein_coding
VEGFC	1.49285	6.09051	44.5157	2.52324e-11	6.89298e-10	9.16159	UP	protein_coding
H2BC7	2.84644	3.27637	44.3776	2.70766e-11	7.3767e-10	9.13214	UP	protein_coding
UBTD2	-0.978913	4.74828	44.376	2.70991e-11	7.3767e-10	9.13214	NO	protein_coding
BMAL1	1.12922	3.42409	44.3447	2.75361e-11	7.48242e-10	9.12596	UP	protein_coding
DPY19L3	-0.766438	6.11149	44.2726	2.85681e-11	7.74917e-10	9.11074	NO	protein_coding
TEAD3	-0.843552	6.18228	44.2602	2.87501e-11	7.78481e-10	9.10875	NO	protein_coding
CDKN2B	-2.13024	4.40225	44.1365	3.06259e-11	8.27815e-10	9.08207	DOWN	protein_coding
KDM4B	0.93993	6.04044	44.0468	3.20618e-11	8.65106e-10	9.06293	NO	protein_coding
MFAP3	-0.670035	5.46639	44.0104	3.26638e-11	8.79807e-10	9.05561	NO	protein_coding
GREM2	2.72786	3.09988	43.9541	3.36168e-11	9.03891e-10	9.04388	UP	protein_coding
EIF3E	-0.790712	7.62849	43.6954	3.83681e-11	1.02805e-09	8.98799	NO	protein_coding
TMEM184C	-0.781515	5.76747	43.516	4.20514e-11	1.12283e-09	8.94969	NO	protein_coding
SYDE2	-1.55627	4.07274	43.3354	4.61157e-11	1.22922e-09	8.91037	DOWN	protein_coding
RPL26	-0.673771	7.938	43.2625	4.78662e-11	1.27367e-09	8.89494	NO	protein_coding
AK4	2.72476	2.44098	43.2575	4.79901e-11	1.27476e-09	8.89457	UP	protein_coding
MAP2K1	1.09144	5.49241	43.2286	4.87045e-11	1.29151e-09	8.8889	UP	protein_coding
MZF1	0.976221	4.19667	43.2214	4.88823e-11	1.29399e-09	8.88807	NO	protein_coding
SLFN11	-1.18509	5.07181	43.2093	4.91866e-11	1.29981e-09	8.88612	DOWN	protein_coding
RAB23	-1.10134	5.71359	43.1816	4.98874e-11	1.31607e-09	8.88072	DOWN	protein_coding
H1.5	3.6268	5.45182	43.1623	5.03819e-11	1.32684e-09	8.87718	UP	protein_coding
FERMT2	-0.899798	7.26809	43.1395	5.09715e-11	1.34007e-09	8.87287	NO	protein_coding
RFX1	0.991738	4.18774	43.1328	5.11483e-11	1.34242e-09	8.87211	NO	protein_coding
CDC20	3.46077	4.52048	43.0837	5.24483e-11	1.3742e-09	8.86195	UP	protein_coding
NPHP4	1.13448	3.27361	43.029	5.39337e-11	1.41072e-09	8.85056	UP	protein_coding
KLHL3	2.4507	2.81413	43.0238	5.40776e-11	1.41208e-09	8.85014	UP	protein_coding
STBD1	1.47543	2.74062	43.0021	5.46818e-11	1.42543e-09	8.84605	UP	protein_coding
SMPDL3A	-1.15553	3.95318	42.9749	5.54464e-11	1.44292e-09	8.84076	DOWN	protein_coding
LACC1	-1.22864	4.18988	42.814	6.01994e-11	1.56133e-09	8.80651	DOWN	protein_coding
ZNF3	-0.623889	4.84109	42.4422	7.28021e-11	1.88184e-09	8.72542	NO	protein_coding
SLC6A15	1.95232	1.54843	42.4385	7.29411e-11	1.88227e-09	8.72532	UP	protein_coding
PLK1	3.01704	4.52878	42.3646	7.575e-11	1.95148e-09	8.70964	UP	protein_coding
CENPM	3.00774	1.05426	42.3342	7.69357e-11	1.97871e-09	8.70362	UP	protein_coding
DCTN3	0.651291	4.83458	42.2196	8.15799e-11	2.09466e-09	8.67889	NO	protein_coding
WARS1	-1.77022	7.50718	42.1859	8.29955e-11	2.12745e-09	8.67214	DOWN	protein_coding
CADM4	-1.76269	2.08724	42.1344	8.52095e-11	2.17695e-09	8.66215	DOWN	protein_coding
HDAC5	1.02696	5.9324	42.0693	8.80935e-11	2.2469e-09	8.64842	UP	protein_coding
GRAMD1B	1.73161	4.62784	42.0278	8.99834e-11	2.2913e-09	8.63992	UP	protein_coding
LRRC8D	-0.979292	5.05399	41.6658	1.08286e-10	2.74371e-09	8.56166	NO	protein_coding
CDON	1.54593	1.47393	41.6001	1.11987e-10	2.83284e-09	8.54778	UP	protein_coding
SERAC1	-1.21346	3.83279	41.5749	1.13442e-10	2.86492e-09	8.54289	DOWN	protein_coding
TICRR	2.88639	3.12815	41.5392	1.15529e-10	2.91282e-09	8.53569	UP	protein_coding
NNMT	-1.73714	5.58792	41.536	1.15717e-10	2.91282e-09	8.53569	DOWN	protein_coding
CDC42SE2	-0.761919	4.96067	41.4938	1.18244e-10	2.96671e-09	8.52773	NO	protein_coding
ZNF18	-1.023	2.56396	41.4083	1.23531e-10	3.09432e-09	8.50943	DOWN	protein_coding
POGK	-0.693915	5.66977	41.3562	1.26867e-10	3.17272e-09	8.49857	NO	protein_coding
MT1X	2.79478	6.31159	41.3118	1.29782e-10	3.24034e-09	8.48941	UP	protein_coding
AFAP1L1	1.23892	3.52442	41.1384	1.41823e-10	3.52951e-09	8.45229	UP	protein_coding
ARHGAP33	1.37591	3.14895	41.0646	1.47279e-10	3.65937e-09	8.43659	UP	protein_coding
MSANTD4	-0.76053	4.70539	41.0346	1.49562e-10	3.71009e-09	8.43062	NO	protein_coding
RC3H2	-0.527366	6.58946	40.9131	1.5915e-10	3.94158e-09	8.40433	NO	protein_coding
MBLAC2	-1.02705	3.31979	40.897	1.60469e-10	3.96786e-09	8.40144	DOWN	protein_coding
IFIT5	-0.748449	4.78585	40.8203	1.66889e-10	4.11339e-09	8.3858	NO	protein_coding
SEMA6D	1.44694	4.84727	40.8076	1.67981e-10	4.13368e-09	8.38366	UP	protein_coding
PMAIP1	-1.04252	5.18055	40.8002	1.68612e-10	4.14257e-09	8.38273	DOWN	protein_coding
FNDC3B	-0.842463	8.48542	40.7837	1.70045e-10	4.17111e-09	8.37975	NO	protein_coding
CREB3L2	0.866252	8.08202	40.7573	1.72355e-10	4.22105e-09	8.37458	NO	protein_coding
MXD3	1.90419	1.99671	40.7387	1.74005e-10	4.25268e-09	8.37134	UP	protein_coding
H3C13	3.56131	2.22064	40.7365	1.74199e-10	4.25268e-09	8.37134	UP	protein_coding
CCNA2	2.73927	4.50722	40.7129	1.76321e-10	4.29764e-09	8.36677	UP	protein_coding
NPC1	1.42942	5.71193	40.7071	1.76842e-10	4.30354e-09	8.36617	UP	protein_coding
JAZF1	-1.57578	5.11176	40.7009	1.77404e-10	4.31037e-09	8.36549	DOWN	protein_coding
HMGA1	0.954854	9.64418	40.6618	1.80992e-10	4.39063e-09	8.35747	NO	protein_coding
S1PR3	-1.669	6.75157	40.5798	1.88752e-10	4.56448e-09	8.34061	DOWN	protein_coding
SEL1L3	-1.31838	5.72706	40.4922	1.97398e-10	4.7586e-09	8.32252	DOWN	protein_coding
DEPDC1	3.0791	4.12361	40.344	2.1296e-10	5.11768e-09	8.29093	UP	protein_coding
IPCEF1	-4.68033	-0.672047	40.249	2.23564e-10	5.3569e-09	8.27109	DOWN	protein_coding
ACBD5	0.599516	4.75707	40.2486	2.23611e-10	5.3569e-09	8.27109	NO	protein_coding
MMP1	2.40129	7.53272	40.2179	2.27158e-10	5.43341e-09	8.26493	UP	protein_coding
H2AC15	2.37716	2.39846	40.1101	2.40039e-10	5.72371e-09	8.24232	UP	protein_coding
SGMS2	-1.23459	5.45728	40.0612	2.46134e-10	5.85998e-09	8.2321	DOWN	protein_coding
ALDH1B1	-1.64539	5.5689	39.8817	2.69823e-10	6.40414e-09	8.19354	DOWN	protein_coding
MAP3K14	-1.44286	3.98697	39.8675	2.71784e-10	6.44074e-09	8.19106	DOWN	protein_coding
SQOR	-1.41368	4.94399	39.6574	3.02656e-10	7.1613e-09	8.14501	DOWN	protein_coding
INSC	2.54235	-0.0845004	39.5923	3.12907e-10	7.39249e-09	8.13121	UP	protein_coding
DLC1	-0.967976	8.06666	39.5717	3.16238e-10	7.45973e-09	8.12728	NO	protein_coding
MAML3	1.21001	3.28086	39.5682	3.16808e-10	7.46172e-09	8.12716	UP	protein_coding
KLHL9	-0.533315	6.29606	39.5634	3.17572e-10	7.46828e-09	8.12678	NO	protein_coding
H2BC5	1.98717	3.82168	39.5164	3.25315e-10	7.63869e-09	8.11698	UP	protein_coding
NFXL1	-0.950802	4.24271	39.5131	3.25873e-10	7.64014e-09	8.1169	NO	protein_coding
BIRC5	3.05122	4.4138	39.3354	3.56909e-10	8.34233e-09	8.07871	UP	protein_coding
GOLGA7	-0.643924	5.25792	39.3229	3.59212e-10	8.38343e-09	8.07658	NO	protein_coding
TPX2	2.44302	5.77335	39.2518	3.72527e-10	8.681e-09	8.06143	UP	protein_coding
WDR36	-0.973705	6.64123	39.2405	3.74685e-10	8.71808e-09	8.05958	NO	protein_coding
TIMP3	-2.21814	10.0939	39.222	3.78258e-10	8.78793e-09	8.05611	DOWN	protein_coding
MAP4K3	-0.95307	6.21086	39.1668	3.891e-10	9.02618e-09	8.0445	NO	protein_coding
ZNF805	-0.690036	5.44551	39.1332	3.95847e-10	9.16888e-09	8.03768	NO	protein_coding
BUB1B	3.34746	3.90285	39.0711	4.08653e-10	9.45124e-09	8.02451	UP	protein_coding
FKBP14	-0.738104	6.54184	39.0014	4.23496e-10	9.75199e-09	8.01091	NO	protein_coding
ROBO4	1.45198	1.73045	39.0011	4.23559e-10	9.75199e-09	8.01091	UP	protein_coding
USP35	0.768744	4.16906	38.9464	4.35613e-10	1.00146e-08	7.99937	NO	protein_coding
ANKRD44	0.96933	3.64476	38.9137	4.4297e-10	1.01685e-08	7.99274	NO	protein_coding
CLASP2	0.773736	5.47734	38.8759	4.51626e-10	1.03517e-08	7.98499	NO	protein_coding
LMNA	0.809501	9.30687	38.8185	4.65106e-10	1.06448e-08	7.97286	NO	protein_coding
UBE2F	-0.861073	4.79044	38.7448	4.82988e-10	1.10213e-08	7.95777	NO	protein_coding
CYP27B1	4.00122	-0.97966	38.7338	4.85716e-10	1.10671e-08	7.95596	UP	protein_coding
IRAG1	-1.15243	6.1001	38.7223	4.88586e-10	1.11161e-08	7.95405	DOWN	protein_coding
LPXN	1.47836	4.85885	38.694	4.95719e-10	1.12617e-08	7.9484	UP	protein_coding
MAT2A	-0.784593	7.72943	38.6338	5.11254e-10	1.15861e-08	7.93606	NO	protein_coding
TSC22D2	-0.853303	7.84556	38.6291	5.12495e-10	1.15861e-08	7.93606	NO	protein_coding
NID2	-1.14678	9.17383	38.6289	5.12537e-10	1.15861e-08	7.93606	DOWN	protein_coding
RNF216	-0.459002	6.32108	38.6131	5.16701e-10	1.16523e-08	7.93359	NO	protein_coding
TOP2A	2.89232	6.58292	38.5766	5.26472e-10	1.18552e-08	7.92609	UP	protein_coding
TRAM1	-1.15536	9.11265	38.5567	5.31853e-10	1.19589e-08	7.92231	DOWN	protein_coding
GFRA1	-1.58092	6.84384	38.5434	5.35507e-10	1.20235e-08	7.91997	DOWN	protein_coding
PIN1	0.733273	5.02674	38.522	5.41397e-10	1.2138e-08	7.91585	NO	protein_coding
SVEP1	-2.57888	8.18693	38.5001	5.475e-10	1.2257e-08	7.91162	DOWN	protein_coding
DTD1	0.9081	4.13421	38.4451	5.63167e-10	1.25894e-08	7.89999	NO	protein_coding
POLQ	3.07106	3.36891	38.4258	5.68742e-10	1.26956e-08	7.89635	UP	protein_coding
PITPNB	-0.97687	6.34558	38.3874	5.80045e-10	1.29104e-08	7.88906	NO	protein_coding
TNK2	0.750914	5.62432	38.3726	5.84467e-10	1.299e-08	7.88639	NO	protein_coding
HRK	6.5662	-1.67205	38.3668	5.86212e-10	1.301e-08	7.88572	UP	protein_coding
CCNB1	2.40459	4.96757	38.3616	5.87765e-10	1.30257e-08	7.8852	UP	protein_coding
ATG9B	5.40604	-2.4106	38.346	5.92509e-10	1.31119e-08	7.88233	UP	protein_coding
MCC	-1.37041	5.75863	38.2856	6.11123e-10	1.35044e-08	7.86952	DOWN	protein_coding
ENOX1	-2.03413	1.94561	38.2786	6.1332e-10	1.35189e-08	7.86906	DOWN	protein_coding
HEG1	-1.5722	8.71875	38.2779	6.13539e-10	1.35189e-08	7.86906	DOWN	protein_coding
CENPK	2.55396	2.05563	38.2712	6.1566e-10	1.35463e-08	7.86818	UP	protein_coding
GAPDH	0.694798	11.3199	38.2347	6.27279e-10	1.37822e-08	7.86068	NO	protein_coding
SAPCD2	3.0541	2.10982	38.2312	6.28382e-10	1.37868e-08	7.86054	UP	protein_coding
ATP2A2	-0.46447	9.00638	38.1835	6.43947e-10	1.40881e-08	7.85115	NO	protein_coding
PLEKHO2	-0.921346	5.96838	38.1669	6.49444e-10	1.4168e-08	7.84869	NO	protein_coding
THSD4	-1.50184	8.1948	37.9593	7.2237e-10	1.57144e-08	7.8037	DOWN	protein_coding
CKS1B	2.11065	3.28815	37.9559	7.23623e-10	1.57194e-08	7.80356	UP	protein_coding
TESMIN	1.87286	0.213425	37.9089	7.41258e-10	1.60798e-08	7.79372	UP	protein_coding
H2AC14	3.35571	3.61519	37.8572	7.61156e-10	1.64882e-08	7.78283	UP	protein_coding
CLCA2	-1.95037	1.49265	37.8361	7.69435e-10	1.6644e-08	7.77874	DOWN	protein_coding
GTSE1	3.43354	3.54959	37.7903	7.87706e-10	1.70153e-08	7.76916	UP	protein_coding
IFNE	3.03071	1.25559	37.7789	7.92337e-10	1.70914e-08	7.76722	UP	protein_coding
H2BC14	3.99933	2.06061	37.7615	7.99451e-10	1.72207e-08	7.76395	UP	protein_coding
AFAP1	-0.859032	7.73914	37.7569	8.01315e-10	1.72367e-08	7.76355	NO	protein_coding
PHF21A	0.926097	5.58335	37.7289	8.12914e-10	1.74618e-08	7.75791	NO	protein_coding
PLP2	1.31236	5.7676	37.7221	8.15735e-10	1.74979e-08	7.75701	UP	protein_coding
ARL1	-0.636302	6.73747	37.712	8.20002e-10	1.75649e-08	7.75535	NO	protein_coding
HNMT	-2.00588	3.03486	37.6191	8.59972e-10	1.83702e-08	7.73589	DOWN	protein_coding
CNN2	-0.987232	8.94959	37.6171	8.6087e-10	1.83702e-08	7.73589	NO	protein_coding
GCLM	-1.67013	6.24541	37.6164	8.6118e-10	1.83702e-08	7.73589	DOWN	protein_coding
NEPRO	-0.680321	5.00647	37.5875	8.74018e-10	1.86183e-08	7.73006	NO	protein_coding
ARL14EP	-0.702226	4.27805	37.5283	9.00964e-10	1.91657e-08	7.71747	NO	protein_coding
TTC28	-0.995301	6.43345	37.5065	9.11067e-10	1.93481e-08	7.71336	NO	protein_coding
IL12A	-2.96273	2.31105	37.5037	9.12379e-10	1.93481e-08	7.71336	DOWN	protein_coding
PLCH2	3.07432	1.69284	37.5017	9.13311e-10	1.93481e-08	7.71336	UP	protein_coding
SHB	0.67524	5.54932	37.4944	9.16766e-10	1.9393e-08	7.71236	NO	protein_coding
H2BC18	2.50154	4.30692	37.4919	9.1795e-10	1.9393e-08	7.71236	UP	protein_coding
TUBGCP2	0.493439	6.17923	37.4407	9.4234e-10	1.98374e-08	7.70252	NO	protein_coding
RAB32	-0.877368	4.88979	37.4397	9.42857e-10	1.98374e-08	7.70252	NO	protein_coding
SNX25	0.864216	4.28251	37.3339	9.95391e-10	2.08987e-08	7.67988	NO	protein_coding
MDFIC	0.57287	6.11187	37.3327	9.96018e-10	2.08987e-08	7.67988	NO	protein_coding
SMIM13	-0.785392	5.12776	37.2859	1.02019e-09	2.13767e-08	7.67006	NO	protein_coding
TRMT10C	-0.798942	3.87564	37.1887	1.07231e-09	2.24384e-08	7.64901	NO	protein_coding
MXI1	1.53445	3.95216	37.1855	1.07407e-09	2.24446e-08	7.64889	UP	protein_coding
PNRC2	-0.612543	5.97814	37.1538	1.09169e-09	2.2758e-08	7.64287	NO	protein_coding
RACGAP1	2.11809	4.74962	37.1532	1.09203e-09	2.2758e-08	7.64287	UP	protein_coding
MAP1LC3B2	2.07645	-0.41576	37.1403	1.0993e-09	2.28785e-08	7.64057	UP	protein_coding
WDR62	2.9861	3.42973	37.0508	1.15094e-09	2.39155e-08	7.62132	UP	protein_coding
TSPAN6	-1.09449	4.31278	37.0486	1.15223e-09	2.39155e-08	7.62132	DOWN	protein_coding
H3C7	3.11366	3.60572	37.039	1.15788e-09	2.40002e-08	7.61979	UP	protein_coding
CYTL1	-3.33295	1.27296	37.0256	1.1659e-09	2.4134e-08	7.61737	DOWN	protein_coding
GBP1	-1.46273	5.87304	37.0173	1.17089e-09	2.41994e-08	7.6162	DOWN	protein_coding
TMEM64	-0.810267	4.7516	37.0151	1.17221e-09	2.41994e-08	7.6162	NO	protein_coding
KIF4A	3.1253	4.01247	37.0101	1.17516e-09	2.42279e-08	7.61568	UP	protein_coding
PPP1R3C	1.30498	5.82245	36.9435	1.21604e-09	2.50036e-08	7.602	UP	protein_coding
MATN2	-1.55351	4.92526	36.9407	1.21775e-09	2.50053e-08	7.60197	DOWN	protein_coding
UBE2C	3.40617	3.20295	36.9331	1.22251e-09	2.50696e-08	7.60085	UP	protein_coding
H4C4	2.81146	3.44368	36.9262	1.22686e-09	2.51253e-08	7.59989	UP	protein_coding
MCM5	1.99858	4.75748	36.9138	1.23469e-09	2.5252e-08	7.5977	UP	protein_coding
ASPM	3.2061	6.05766	36.8797	1.2565e-09	2.56639e-08	7.59068	UP	protein_coding
H2BC9	2.51642	3.48117	36.8628	1.26739e-09	2.5852e-08	7.58751	UP	protein_coding
PRKAG2	-0.956366	4.90085	36.8401	1.28226e-09	2.61208e-08	7.58301	NO	protein_coding
BMP4	-3.35435	3.71177	36.8317	1.2878e-09	2.61988e-08	7.58172	DOWN	protein_coding
PSTPIP2	-0.917332	4.44765	36.8132	1.30008e-09	2.64137e-08	7.57817	NO	protein_coding
CLEC2D	1.36669	2.89515	36.7231	1.36158e-09	2.76267e-08	7.55867	UP	protein_coding
KBTBD6	-0.733769	4.5963	36.7139	1.36798e-09	2.77201e-08	7.5572	NO	protein_coding
BNC2	-1.00599	6.706	36.6303	1.42792e-09	2.88586e-08	7.53973	DOWN	protein_coding
CCDC77	1.63961	1.88827	36.5668	1.47526e-09	2.97373e-08	7.5267	UP	protein_coding
CDC25C	3.46643	1.37414	36.5613	1.47943e-09	2.97823e-08	7.52604	UP	protein_coding
GTF3C4	-0.650903	5.60147	36.5095	1.51926e-09	3.05043e-08	7.51564	NO	protein_coding
ENSG00000284946	2.72836	2.50902	36.5056	1.52229e-09	3.05071e-08	7.5156	UP	protein_coding
IL27RA	-1.1096	2.56878	36.5042	1.52337e-09	3.05071e-08	7.5156	DOWN	protein_coding
RASD1	2.09765	0.212811	36.4584	1.55959e-09	3.11803e-08	7.50612	UP	protein_coding
AXL	0.757315	9.51778	36.4545	1.56273e-09	3.11803e-08	7.50612	NO	protein_coding
EXOC6	-1.13842	4.22025	36.4541	1.56307e-09	3.11803e-08	7.50612	DOWN	protein_coding
WDR75	-0.638225	5.27166	36.4334	1.57977e-09	3.14726e-08	7.50207	NO	protein_coding
H2AC11	2.804	4.45486	36.3995	1.60746e-09	3.19828e-08	7.49508	UP	protein_coding
CCNT1	-0.580615	5.73626	36.3167	1.67718e-09	3.3327e-08	7.4772	NO	protein_coding
KNL1	3.12841	5.10994	36.1327	1.84323e-09	3.64851e-08	7.43788	UP	protein_coding
COL3A1	-2.04862	10.3014	36.0753	1.89839e-09	3.75286e-08	7.42564	DOWN	protein_coding
KIFC1	3.03496	3.86109	36.0133	1.9598e-09	3.86432e-08	7.41293	UP	protein_coding
CTSC	-1.06677	8.74969	35.9389	2.03598e-09	4.0094e-08	7.39692	DOWN	protein_coding
PCLAF	2.20097	3.05072	35.9153	2.06085e-09	4.05319e-08	7.3922	UP	protein_coding
SPDL1	1.94078	4.52365	35.868	2.11151e-09	4.14752e-08	7.38221	UP	protein_coding
NDC80	3.21385	3.02535	35.8442	2.13748e-09	4.19317e-08	7.37746	UP	protein_coding
PLXNA4	3.28314	0.872098	35.8122	2.1728e-09	4.25702e-08	7.37089	UP	protein_coding
MT1E	1.67106	6.40611	35.7055	2.2951e-09	4.48522e-08	7.34822	UP	protein_coding
DCAF10	-0.629279	5.81962	35.6846	2.31995e-09	4.52803e-08	7.34409	NO	protein_coding
MIER3	-0.694426	4.60643	35.6534	2.35732e-09	4.59513e-08	7.3377	NO	protein_coding
TRNP1	0.906793	6.38492	35.6124	2.40749e-09	4.687e-08	7.32911	NO	protein_coding
ZEB1	-0.902609	7.92536	35.5564	2.47778e-09	4.81773e-08	7.31716	NO	protein_coding
H4C13	3.00513	2.54778	35.5206	2.52363e-09	4.89451e-08	7.31029	UP	protein_coding
UPP1	1.12992	3.71272	35.5149	2.5311e-09	4.90023e-08	7.30978	UP	protein_coding
CIBAR1	-0.984105	4.55609	35.5135	2.53295e-09	4.90023e-08	7.30978	NO	protein_coding
XKR8	0.890094	3.51653	35.4861	2.56871e-09	4.96317e-08	7.30424	NO	protein_coding
PBK	3.01149	3.31879	35.4458	2.62254e-09	5.06081e-08	7.29578	UP	protein_coding
BMF	1.73562	3.33783	35.4189	2.65892e-09	5.12459e-08	7.29034	UP	protein_coding
PGD	-0.98532	8.12242	35.3863	2.70379e-09	5.20021e-08	7.28398	NO	protein_coding
SLC16A7	-0.895199	6.03593	35.3855	2.70492e-09	5.20021e-08	7.28398	NO	protein_coding
NUSAP1	2.82905	4.17649	35.3698	2.72678e-09	5.23568e-08	7.28103	UP	protein_coding
PTBP3	-0.644401	6.65466	35.3122	2.80874e-09	5.38633e-08	7.26871	NO	protein_coding
IL17RE	1.72305	2.204	35.2996	2.82687e-09	5.41435e-08	7.26645	UP	protein_coding
MAD2L1	2.34591	3.55809	35.1859	2.99689e-09	5.73286e-08	7.24163	UP	protein_coding
CENPV	-0.921863	3.09771	35.1664	3.02694e-09	5.78315e-08	7.23784	NO	protein_coding
BLID	2.24214	1.47736	35.1425	3.06436e-09	5.84738e-08	7.23304	UP	protein_coding
H4C6	1.85986	4.11508	35.1076	3.11974e-09	5.94568e-08	7.2258	UP	protein_coding
H3C4	2.36394	4.12052	35.0889	3.14997e-09	5.98374e-08	7.22303	UP	protein_coding
ZCCHC10	-0.741486	3.04483	35.088	3.15139e-09	5.98374e-08	7.22303	NO	protein_coding
TBC1D1	0.735209	6.18195	35.0295	3.24741e-09	6.15088e-08	7.21106	NO	protein_coding
EIF3F	-0.611191	7.91536	35.0164	3.26945e-09	6.18501e-08	7.20866	NO	protein_coding
RAD51AP1	2.98074	1.92143	34.9973	3.30164e-09	6.23823e-08	7.20494	UP	protein_coding
MAK16	-1.05059	4.97778	34.9018	3.46761e-09	6.53577e-08	7.1847	DOWN	protein_coding
ATP5IF1	1.16513	4.036	34.8732	3.5189e-09	6.62432e-08	7.17886	UP	protein_coding
ANGPT1	-1.09014	6.42922	34.8423	3.57528e-09	6.71768e-08	7.17278	DOWN	protein_coding
ADPRHL1	3.04895	1.40468	34.8412	3.57723e-09	6.71768e-08	7.17278	UP	protein_coding
AURKB	3.2742	2.9868	34.7709	3.70878e-09	6.95622e-08	7.15763	UP	protein_coding
SLC20A2	-1.45831	6.45954	34.6956	3.855e-09	7.22168e-08	7.14136	DOWN	protein_coding
TMEM167A	-0.676966	6.78295	34.6571	3.93195e-09	7.35686e-08	7.13331	NO	protein_coding
TOX2	0.820059	4.61986	34.6128	4.02244e-09	7.51703e-08	7.12395	NO	protein_coding
H2BC13	2.98559	2.44072	34.6009	4.04711e-09	7.55394e-08	7.12183	UP	protein_coding
CPNE2	0.71927	3.97616	34.5826	4.0854e-09	7.61617e-08	7.11826	NO	protein_coding
ANLN	2.539	7.09556	34.5198	4.2194e-09	7.84697e-08	7.1053	UP	protein_coding
NLE1	-0.901053	3.87749	34.5139	4.23214e-09	7.86114e-08	7.10451	NO	protein_coding
HNRNPA1L2	10.2426	0.920841	34.478	4.31105e-09	7.99806e-08	7.09702	UP	protein_coding
MIPEP	-0.749374	4.23906	34.4576	4.35648e-09	8.0629e-08	7.09351	NO	protein_coding
C7	-4.29765	5.03807	34.4543	4.36379e-09	8.06673e-08	7.0933	DOWN	protein_coding
PODXL	3.41695	4.71215	34.4053	4.47502e-09	8.25249e-08	7.08341	UP	protein_coding
H2AC17	2.41058	3.63374	34.3759	4.54319e-09	8.36818e-08	7.07737	UP	protein_coding
ZWINT	2.53354	3.29871	34.3557	4.59047e-09	8.44515e-08	7.07339	UP	protein_coding
MAGED4	-1.10633	6.07612	34.3488	4.60681e-09	8.46509e-08	7.07237	DOWN	protein_coding
PLK2	-1.76208	7.21663	34.3165	4.68404e-09	8.59672e-08	7.06567	DOWN	protein_coding
RND3	-1.50174	8.83441	34.2977	4.72938e-09	8.66958e-08	7.062	DOWN	protein_coding
THBD	3.67685	-0.827898	34.2651	4.80931e-09	8.80562e-08	7.05524	UP	protein_coding
STAT3	-0.714315	7.56679	34.2531	4.83908e-09	8.84959e-08	7.05308	NO	protein_coding
TROAP	3.27968	3.09698	34.2088	4.95044e-09	9.04249e-08	7.04371	UP	protein_coding
TTK	3.03491	3.57107	34.1607	5.07445e-09	9.25801e-08	7.03348	UP	protein_coding
SMIM3	1.06174	4.07078	34.1428	5.12136e-09	9.32307e-08	7.03044	UP	protein_coding
STARD13	-0.591357	6.20065	34.1424	5.12223e-09	9.32307e-08	7.03044	NO	protein_coding
ADAM8	2.39098	0.983389	34.0634	5.3344e-09	9.68632e-08	7.01384	UP	protein_coding
EFEMP1	-1.26683	8.4268	34.0061	5.49402e-09	9.96438e-08	7.00155	DOWN	protein_coding
DIO2	-2.54224	5.97063	33.9924	5.53278e-09	1.00229e-07	6.99901	DOWN	protein_coding
H3C12	3.28144	2.86164	33.9898	5.54011e-09	1.00243e-07	6.99894	UP	protein_coding
ENOSF1	1.31639	4.44339	33.9626	5.61816e-09	1.01536e-07	6.99338	UP	protein_coding
LCA5	0.968768	3.1234	33.9603	5.62495e-09	1.0154e-07	6.99336	NO	protein_coding
KCNC3	4.56125	-1.33614	33.9061	5.78364e-09	1.0416e-07	6.9823	UP	protein_coding
NFKB1	-0.729264	5.50339	33.8547	5.9386e-09	1.06825e-07	6.97133	NO	protein_coding
PISD	-0.64787	5.06604	33.834	6.00208e-09	1.07715e-07	6.96772	NO	protein_coding
SAR1A	-0.570019	7.58841	33.776	6.18379e-09	1.10847e-07	6.95528	NO	protein_coding
DBF4B	1.80562	3.16135	33.7321	6.32492e-09	1.13245e-07	6.94598	UP	protein_coding
TPT1	-0.774348	9.80599	33.7268	6.34196e-09	1.13418e-07	6.94532	NO	protein_coding
EPAS1	-1.89087	9.21948	33.706	6.41036e-09	1.14508e-07	6.94116	DOWN	protein_coding
ZFAND5	-1.18189	7.84874	33.6659	6.54363e-09	1.16753e-07	6.93273	DOWN	protein_coding
CHAMP1	-0.880451	5.78966	33.6607	6.56115e-09	1.1693e-07	6.93207	NO	protein_coding
H3C10	2.38602	3.73177	33.6295	6.66753e-09	1.18687e-07	6.9256	UP	protein_coding
TMEM47	-0.901367	7.44969	33.6272	6.67519e-09	1.18687e-07	6.9256	NO	protein_coding
PERP	-0.681463	7.1222	33.6206	6.6978e-09	1.18952e-07	6.92463	NO	protein_coding
MT.ATP6	2.05917	8.65823	33.6166	6.71184e-09	1.19063e-07	6.92422	UP	protein_coding
ASGR1	1.722	0.607609	33.5911	6.80024e-09	1.20493e-07	6.91904	UP	protein_coding
FYTTD1	-0.639674	6.30625	33.5539	6.93156e-09	1.22678e-07	6.91123	NO	protein_coding
USP38	-0.516034	5.35935	33.5214	7.04847e-09	1.24604e-07	6.90447	NO	protein_coding
ENO1	0.854208	9.82429	33.5114	7.08493e-09	1.25105e-07	6.90273	NO	protein_coding
MT.ND2	1.79634	8.75317	33.4357	7.36605e-09	1.29919e-07	6.88633	UP	protein_coding
CNOT8	0.681016	4.98576	33.4214	7.42022e-09	1.30626e-07	6.88397	NO	protein_coding
HECW2	1.22409	4.39891	33.4207	7.42308e-09	1.30626e-07	6.88397	UP	protein_coding
SEC11C	1.3428	2.39975	33.4118	7.45721e-09	1.31076e-07	6.88248	UP	protein_coding
GINS2	2.72168	1.945	33.3638	7.64322e-09	1.3404e-07	6.87277	UP	protein_coding
SPAST	-0.648904	4.69494	33.3222	7.80863e-09	1.36784e-07	6.86396	NO	protein_coding
DR1	-0.52478	6.47168	33.3058	7.87461e-09	1.37783e-07	6.8608	NO	protein_coding
SNX18	-1.21119	7.76279	33.2683	8.02794e-09	1.40307e-07	6.85292	DOWN	protein_coding
BLTP3A	-1.01101	4.55392	33.2064	8.28778e-09	1.44519e-07	6.84007	DOWN	protein_coding
H2BC15	2.06966	3.17745	33.1687	8.44981e-09	1.47178e-07	6.83216	UP	protein_coding
NCK1	-0.849351	4.76781	33.0865	8.81495e-09	1.53364e-07	6.81428	NO	protein_coding
CAMK1	0.718355	3.69329	33.0641	8.91701e-09	1.54964e-07	6.80977	NO	protein_coding
DIPK2A	1.16498	4.92137	33.0506	8.97911e-09	1.55868e-07	6.80724	UP	protein_coding
RECK	-1.00616	7.14433	33.0483	8.9899e-09	1.55879e-07	6.80721	DOWN	protein_coding
HOXA6	1.72771	-0.445473	33.0325	9.0632e-09	1.56973e-07	6.80418	UP	protein_coding
REEP4	1.17464	4.07247	33.0172	9.13493e-09	1.58037e-07	6.80124	UP	protein_coding
NIM1K	2.83179	-0.600427	32.9539	9.43716e-09	1.62899e-07	6.78808	UP	protein_coding
BCKDK	0.592142	5.30388	32.9431	9.4896e-09	1.63621e-07	6.78616	NO	protein_coding
VEGFA	1.49601	7.37047	32.9063	9.67086e-09	1.66373e-07	6.77892	UP	protein_coding
CDCA8	2.94135	3.55498	32.8958	9.72337e-09	1.6709e-07	6.77705	UP	protein_coding
DLGAP5	3.05777	4.17248	32.8623	9.89221e-09	1.69801e-07	6.77006	UP	protein_coding
CENPJ	1.41225	3.87547	32.7801	1.03198e-08	1.76944e-07	6.75216	UP	protein_coding
NUF2	3.39326	2.80938	32.754	1.04588e-08	1.78929e-07	6.74732	UP	protein_coding
TPBG	1.01424	6.7789	32.7518	1.04709e-08	1.78937e-07	6.7473	UP	protein_coding
NEURL1	2.06386	0.408805	32.7033	1.07357e-08	1.83055e-07	6.73742	UP	protein_coding
EFL1	0.885986	4.53439	32.6836	1.08446e-08	1.84707e-07	6.73352	NO	protein_coding
KLF12	-0.671172	6.26437	32.6756	1.08894e-08	1.85264e-07	6.73221	NO	protein_coding
H2BC4	1.26375	5.11079	32.641	1.10854e-08	1.88182e-07	6.72542	UP	protein_coding
MYO1B	-0.867188	7.82889	32.6289	1.11544e-08	1.89145e-07	6.7232	NO	protein_coding
WDR54	1.13249	2.44974	32.6066	1.12828e-08	1.90972e-07	6.71903	UP	protein_coding
CWC27	0.710921	4.40077	32.6059	1.1287e-08	1.90972e-07	6.71903	NO	protein_coding
LRRC15	1.74244	6.76318	32.5895	1.13828e-08	1.92171e-07	6.71631	UP	protein_coding
H2AC21	2.55669	2.65374	32.5849	1.14095e-08	1.92411e-07	6.71577	UP	protein_coding
SH3BP4	-0.6057	7.96153	32.564	1.15332e-08	1.94283e-07	6.71156	NO	protein_coding
KLHL5	-1.03831	7.43688	32.5515	1.16077e-08	1.95324e-07	6.70924	DOWN	protein_coding
ANKRD36B	1.23984	3.67449	32.5469	1.16348e-08	1.95566e-07	6.70871	UP	protein_coding
PPFIBP1	0.772018	6.78824	32.5268	1.17558e-08	1.97385e-07	6.70469	NO	protein_coding
DRP2	0.9733	5.25156	32.5213	1.17893e-08	1.97731e-07	6.70393	NO	protein_coding
LITAF	-1.29336	6.82298	32.517	1.18153e-08	1.97951e-07	6.70344	DOWN	protein_coding
C1S	-2.12102	8.07267	32.4979	1.19324e-08	1.99695e-07	6.69963	DOWN	protein_coding
RALGPS1	-1.63588	1.40197	32.4821	1.20298e-08	2.01106e-07	6.69657	DOWN	protein_coding
FANCI	1.90597	4.46968	32.4376	1.23081e-08	2.05333e-07	6.68754	UP	protein_coding
LAMP5	7.2046	-1.08232	32.4374	1.23093e-08	2.05333e-07	6.68754	UP	protein_coding
INMT	-2.22708	2.82962	32.4078	1.24986e-08	2.08039e-07	6.68185	DOWN	protein_coding
POC1A	1.96172	2.48556	32.3816	1.26683e-08	2.10637e-07	6.67647	UP	protein_coding
KIF22	2.01676	4.39641	32.3464	1.28996e-08	2.14251e-07	6.66908	UP	protein_coding
GLYCTK	1.32762	2.35346	32.3279	1.3023e-08	2.16067e-07	6.66541	UP	protein_coding
CEP290	0.625082	5.14808	32.3181	1.30885e-08	2.1692e-07	6.6637	NO	protein_coding
ARRB1	-1.78152	4.90473	32.3153	1.3108e-08	2.17008e-07	6.66352	DOWN	protein_coding
KLC1	0.60897	7.19216	32.297	1.3232e-08	2.18826e-07	6.6599	NO	protein_coding
MDM2	-1.02242	8.77702	32.2604	1.34831e-08	2.22553e-07	6.65257	DOWN	protein_coding
CDK17	-0.765097	5.83274	32.26	1.34863e-08	2.22553e-07	6.65257	NO	protein_coding
SULT1A1	-2.70732	-0.430541	32.2562	1.35123e-08	2.22742e-07	6.6522	DOWN	protein_coding
B4GALT5	-0.92675	5.54017	32.2059	1.3867e-08	2.28345e-07	6.64141	NO	protein_coding
PGM2	0.860194	4.89819	32.1946	1.39481e-08	2.29189e-07	6.63981	NO	protein_coding
PDE4DIP	-0.910177	7.63112	32.1171	1.45156e-08	2.38007e-07	6.62341	NO	protein_coding
SDE2	-0.707491	4.79376	32.074	1.48409e-08	2.4308e-07	6.61425	NO	protein_coding
PDLIM1	-0.827864	7.19394	32.0358	1.51361e-08	2.47652e-07	6.60616	NO	protein_coding
DENND2D	-1.99864	0.745785	32.0246	1.52234e-08	2.48817e-07	6.60412	DOWN	protein_coding
PLEKHA1	-0.574807	4.58861	32.0185	1.52709e-08	2.49327e-07	6.60323	NO	protein_coding
MTMR10	-0.759847	5.43709	31.9988	1.54268e-08	2.51606e-07	6.59928	NO	protein_coding
APBB2	-0.560217	6.51458	31.9929	1.54738e-08	2.52106e-07	6.59842	NO	protein_coding
PKMYT1	3.26944	2.90601	31.9872	1.55194e-08	2.5258e-07	6.5976	UP	protein_coding
CTDP1	0.743286	4.71966	31.972	1.56409e-08	2.54021e-07	6.59513	NO	protein_coding
SHMT1	1.5556	2.17028	31.9469	1.58443e-08	2.57052e-07	6.58998	UP	protein_coding
AMMECR1L	-0.497296	5.25362	31.9398	1.59023e-08	2.57722e-07	6.58885	NO	protein_coding
SLC30A7	-0.673526	7.03074	31.9378	1.59193e-08	2.57724e-07	6.58884	NO	protein_coding
NUDT4	0.510084	6.90362	31.9121	1.61308e-08	2.60343e-07	6.58445	NO	protein_coding
HMMR	2.97277	3.70408	31.912	1.61318e-08	2.60343e-07	6.58445	UP	protein_coding
RUNX1	0.85	7.19536	31.8788	1.641e-08	2.64279e-07	6.57794	NO	protein_coding
RAI1	0.642352	6.79109	31.8753	1.64397e-08	2.6448e-07	6.57761	NO	protein_coding
SIPA1L1	-0.694228	6.80791	31.8066	1.7031e-08	2.73707e-07	6.56271	NO	protein_coding
BMP2K	-0.87535	6.42501	31.7617	1.74298e-08	2.79823e-07	6.55312	NO	protein_coding
KIF15	2.75857	2.82893	31.7312	1.77057e-08	2.83661e-07	6.5472	UP	protein_coding
GCNT4	-1.89339	3.90214	31.7211	1.77978e-08	2.84839e-07	6.5454	DOWN	protein_coding
TDG	-0.896623	4.61562	31.6941	1.80474e-08	2.88533e-07	6.5398	NO	protein_coding
ERRFI1	1.61396	6.31642	31.6791	1.81865e-08	2.90455e-07	6.53692	UP	protein_coding
PDGFC	-0.782293	6.92632	31.6275	1.86771e-08	2.97672e-07	6.52626	NO	protein_coding
MTMR1	-0.574873	5.45924	31.625	1.87003e-08	2.97733e-07	6.52617	NO	protein_coding
PLXNC1	-3.69457	2.92358	31.6086	1.8859e-08	2.99949e-07	6.52295	DOWN	protein_coding
C12orf75	0.751576	7.04919	31.6032	1.89116e-08	3.00476e-07	6.52219	NO	protein_coding
GLI2	0.990706	5.476	31.5767	1.91715e-08	3.0429e-07	6.51671	NO	protein_coding
PDGFB	2.3201	-0.946965	31.5136	1.98053e-08	3.14026e-07	6.50303	UP	protein_coding
EAF1	-0.72451	4.90393	31.5096	1.98459e-08	3.14345e-07	6.50259	NO	protein_coding
KIF20B	2.02663	4.70351	31.365	2.13798e-08	3.38294e-07	6.47071	UP	protein_coding
PSRC1	1.4376	3.38477	31.359	2.14464e-08	3.38999e-07	6.4698	UP	protein_coding
NFX1	-0.461741	5.72386	31.3202	2.18792e-08	3.45485e-07	6.46157	NO	protein_coding
STEAP3	0.787617	6.85054	31.3098	2.19967e-08	3.46984e-07	6.45969	NO	protein_coding
CHI3L1	-3.09515	1.04425	31.2845	2.2285e-08	3.51171e-07	6.45448	DOWN	protein_coding
PLAGL1	0.584474	5.7927	31.2804	2.23328e-08	3.51565e-07	6.45399	NO	protein_coding
SEL1L	-0.577418	8.10675	31.2519	2.26626e-08	3.56392e-07	6.44807	NO	protein_coding
POLR1C	-0.942769	3.56738	31.2368	2.28397e-08	3.5881e-07	6.44514	NO	protein_coding
DHFR	1.45391	4.9499	31.2206	2.30303e-08	3.61435e-07	6.44197	UP	protein_coding
KIF2C	3.18087	3.91769	31.2184	2.30567e-08	3.6148e-07	6.44192	UP	protein_coding
FRS2	-0.604377	5.60895	31.1923	2.33687e-08	3.65998e-07	6.43652	NO	protein_coding
SEC22B	-0.601892	7.73174	31.1884	2.34158e-08	3.66363e-07	6.43609	NO	protein_coding
CKAP2L	3.00033	3.84198	31.1804	2.35128e-08	3.6686e-07	6.4355	UP	protein_coding
RFK	-0.848836	4.66405	31.1799	2.35191e-08	3.6686e-07	6.4355	NO	protein_coding
ZBTB33	-0.72685	4.8978	31.1627	2.3728e-08	3.69744e-07	6.4321	NO	protein_coding
RRM2	2.78392	5.6351	31.1525	2.38531e-08	3.71317e-07	6.43026	UP	protein_coding
FAM91A1	-0.492807	6.49025	31.1496	2.38883e-08	3.71489e-07	6.43005	NO	protein_coding
SPC25	3.21193	1.38727	31.1403	2.40033e-08	3.729e-07	6.42841	UP	protein_coding
RPL21	-0.601693	7.79961	31.1184	2.42754e-08	3.76747e-07	6.42395	NO	protein_coding
H2AC7	2.07007	3.71244	31.1064	2.4427e-08	3.78718e-07	6.42168	UP	protein_coding
TNFSF18	-2.77502	1.08623	31.0798	2.47631e-08	3.83542e-07	6.41619	DOWN	protein_coding
KIF14	2.94579	3.80614	31.0621	2.4991e-08	3.86681e-07	6.41265	UP	protein_coding
PRRC1	-0.615141	7.08549	31.0465	2.51915e-08	3.89392e-07	6.40961	NO	protein_coding
PRKAA1	-0.501432	6.95002	30.9788	2.60856e-08	4.02e-07	6.39577	NO	protein_coding
SNTA1	0.95993	3.6715	30.9648	2.62746e-08	4.0429e-07	6.39331	NO	protein_coding
SEC61G	0.808232	4.72639	30.9639	2.62867e-08	4.0429e-07	6.39331	NO	protein_coding
SORT1	-0.703591	7.04598	30.9525	2.64419e-08	4.0627e-07	6.39118	NO	protein_coding
KIF18B	3.24775	3.93042	30.9482	2.65014e-08	4.06778e-07	6.39064	UP	protein_coding
RBMS3	-0.655228	6.29344	30.935	2.66814e-08	4.09132e-07	6.38814	NO	protein_coding
FXYD5	1.13111	6.32484	30.887	2.735e-08	4.18968e-07	6.37782	UP	protein_coding
CSGALNACT2	-0.910879	5.02604	30.8325	2.81293e-08	4.29621e-07	6.36691	NO	protein_coding
CDCA2	2.55914	4.01153	30.7934	2.87015e-08	4.37492e-07	6.35903	UP	protein_coding
PAX2	9.90912	-2.66217	30.7669	2.90963e-08	4.4307e-07	6.35353	UP	protein_coding
RNF141	-0.863506	5.42444	30.7601	2.91986e-08	4.44189e-07	6.35243	NO	protein_coding
LIG4	-0.659035	4.44672	30.7191	2.98215e-08	4.53216e-07	6.34369	NO	protein_coding
RHOBTB3	-1.50004	8.30153	30.7051	3.00372e-08	4.55594e-07	6.34142	DOWN	protein_coding
PRDX6	-0.710721	8.24051	30.6979	3.01491e-08	4.56793e-07	6.34028	NO	protein_coding
SMYD2	0.701906	4.02247	30.6962	3.01756e-08	4.56793e-07	6.34028	NO	protein_coding
SKA1	3.26552	2.8147	30.6899	3.02738e-08	4.57829e-07	6.3393	UP	protein_coding
H3C8	3.14724	3.95322	30.6861	3.03326e-08	4.58176e-07	6.33897	UP	protein_coding
GNAQ	-0.480343	6.81546	30.6846	3.03564e-08	4.58176e-07	6.33897	NO	protein_coding
KCTD20	-0.776017	6.59888	30.668	3.06173e-08	4.61661e-07	6.33568	NO	protein_coding
RASA4B	1.60791	2.87504	30.6229	3.13371e-08	4.71678e-07	6.32635	UP	protein_coding
BTG1	0.746325	6.37429	30.6225	3.1343e-08	4.71678e-07	6.32635	NO	protein_coding
GRIK2	0.973675	4.79964	30.6205	3.13756e-08	4.71708e-07	6.32633	NO	protein_coding
BTBD3	-0.647476	5.77002	30.5876	3.19124e-08	4.79309e-07	6.31938	NO	protein_coding
HMGN2	1.04577	7.08978	30.569	3.22193e-08	4.83447e-07	6.31565	UP	protein_coding
RNF152	-0.762514	5.64955	30.5268	3.29286e-08	4.93608e-07	6.30662	NO	protein_coding
UBE2S	1.53495	5.63981	30.5198	3.30482e-08	4.94919e-07	6.30547	UP	protein_coding
OPN3	-1.37878	5.40278	30.4911	3.35408e-08	5.01807e-07	6.29946	DOWN	protein_coding
PXN	0.754432	8.0309	30.4367	3.44943e-08	5.1457e-07	6.28856	NO	protein_coding
SH3KBP1	0.657342	6.10232	30.4258	3.46875e-08	5.16952e-07	6.28655	NO	protein_coding
HS3ST3A1	1.17829	4.86885	30.367	3.57559e-08	5.32358e-07	6.2738	UP	protein_coding
SYNC	-0.999822	5.88189	30.365	3.57927e-08	5.32391e-07	6.27377	NO	protein_coding
CENPX	0.887411	3.30765	30.331	3.64257e-08	5.41283e-07	6.26658	NO	protein_coding
NIFK	-0.927954	4.55533	30.2894	3.72149e-08	5.52475e-07	6.25769	NO	protein_coding
ATOSA	0.706043	5.13766	30.2425	3.8127e-08	5.65471e-07	6.24759	NO	protein_coding
DNAJB4	-1.42813	6.53995	30.212	3.873e-08	5.73309e-07	6.24161	DOWN	protein_coding
H2BC8	1.92513	3.13533	30.2068	3.88351e-08	5.74311e-07	6.24085	UP	protein_coding
GANC	0.851607	3.87332	30.1913	3.91454e-08	5.78344e-07	6.23781	NO	protein_coding
RFX8	2.46448	3.05519	30.1819	3.93354e-08	5.80593e-07	6.23613	UP	protein_coding
TOP1	-0.430523	7.05716	30.0866	4.13167e-08	6.09253e-07	6.2152	NO	protein_coding
ESPL1	2.27536	3.41554	30.0236	4.26814e-08	6.28774e-07	6.20151	UP	protein_coding
TRIP13	2.26187	3.49732	30.0104	4.29738e-08	6.32475e-07	6.19896	UP	protein_coding
SLC39A11	-0.883787	4.19658	29.9305	4.47817e-08	6.56571e-07	6.18272	NO	protein_coding
ZSCAN32	-0.650794	3.35162	29.914	4.51635e-08	6.60908e-07	6.17986	NO	protein_coding
PRKD3	-0.76225	6.09266	29.9043	4.53915e-08	6.63613e-07	6.17808	NO	protein_coding
NR1D1	2.02294	3.8708	29.8832	4.58862e-08	6.70209e-07	6.17379	UP	protein_coding
IGFBP2	-3.41084	3.7334	29.8687	4.62319e-08	6.73978e-07	6.17135	DOWN	protein_coding
EME1	2.42381	1.17088	29.8526	4.6616e-08	6.78933e-07	6.16817	UP	protein_coding
H1.3	2.47802	4.32674	29.8506	4.66646e-08	6.78998e-07	6.16813	UP	protein_coding
C1orf52	-0.637154	3.79629	29.8388	4.69507e-08	6.82515e-07	6.16589	NO	protein_coding
OLR1	-2.05886	4.4456	29.8335	4.70797e-08	6.83745e-07	6.16511	DOWN	protein_coding
IRF2BP2	0.876264	6.65779	29.8057	4.77594e-08	6.92962e-07	6.15929	NO	protein_coding
FRYL	0.619755	6.32821	29.8018	4.78551e-08	6.93056e-07	6.15923	NO	protein_coding
WWC2	-0.502399	6.58651	29.7785	4.84323e-08	7.00742e-07	6.15444	NO	protein_coding
DDX6	-0.433526	8.36452	29.7647	4.87787e-08	7.0509e-07	6.15176	NO	protein_coding
SERPINB9	-1.41004	3.08556	29.7568	4.89777e-08	7.07303e-07	6.15039	DOWN	protein_coding
ORMDL1	-0.763174	5.45832	29.7086	5.02106e-08	7.23747e-07	6.14041	NO	protein_coding
PPP1R14B	1.08851	6.0454	29.6728	5.11474e-08	7.3656e-07	6.13279	UP	protein_coding
LPAR1	-1.28903	8.90895	29.6626	5.1417e-08	7.39751e-07	6.13091	DOWN	protein_coding
CACNA1B	4.76615	-2.47319	29.6304	5.22774e-08	7.51426e-07	6.12411	UP	protein_coding
KIF11	2.47446	5.00548	29.6278	5.23495e-08	7.51761e-07	6.12392	UP	protein_coding
LRRC32	-1.40221	4.60504	29.5929	5.32987e-08	7.63253e-07	6.11733	DOWN	protein_coding
TPST1	-1.12245	5.437	29.5576	5.42783e-08	7.76296e-07	6.10997	DOWN	protein_coding
ITCH	-0.446452	6.62456	29.5565	5.43104e-08	7.76296e-07	6.10997	NO	protein_coding
MXRA8	0.818605	8.771	29.546	5.46045e-08	7.79052e-07	6.10843	NO	protein_coding
PPP6C	-0.5478	5.52716	29.4928	5.61234e-08	7.99979e-07	6.09692	NO	protein_coding
THOC5	-0.377364	5.61002	29.4645	5.69508e-08	8.11022e-07	6.09097	NO	protein_coding
PODN	-2.1136	3.86616	29.3295	6.10577e-08	8.67098e-07	6.06193	DOWN	protein_coding
INO80E	0.541258	5.18831	29.3039	6.18724e-08	8.77857e-07	6.05658	NO	protein_coding
TBC1D14	-0.504939	5.68414	29.2804	6.26263e-08	8.87735e-07	6.05172	NO	protein_coding
CENPA	2.73877	1.86582	29.2669	6.30633e-08	8.93107e-07	6.0491	UP	protein_coding
NRIP1	-0.855591	6.55845	29.2587	6.33299e-08	8.95811e-07	6.04778	NO	protein_coding
FANCD2	2.42677	3.48137	29.2575	6.33708e-08	8.95811e-07	6.04778	UP	protein_coding
SGO1	3.37597	1.84728	29.2541	6.34818e-08	8.96556e-07	6.04742	UP	protein_coding
MAPK7	0.672152	4.89881	29.2418	6.3885e-08	9.01424e-07	6.04507	NO	protein_coding
MNT	0.882913	5.61418	29.2237	6.44866e-08	9.09078e-07	6.0414	NO	protein_coding
BTF3L4	-0.756775	5.5122	29.1965	6.53983e-08	9.20243e-07	6.0361	NO	protein_coding
NCAPG	2.98794	3.99081	29.1591	6.66715e-08	9.37301e-07	6.02812	UP	protein_coding
PKP4	-0.649263	6.12488	29.1368	6.74442e-08	9.46435e-07	6.02391	NO	protein_coding
STMN1	0.953229	6.77263	29.1267	6.7797e-08	9.50518e-07	6.02204	NO	protein_coding
SLC39A9	-0.644327	6.6042	29.1132	6.82692e-08	9.56266e-07	6.01942	NO	protein_coding
NXN	-1.29561	6.70518	29.1013	6.86912e-08	9.61302e-07	6.01714	DOWN	protein_coding
ORC6	2.17703	2.66147	29.0429	7.07916e-08	9.89796e-07	6.00445	UP	protein_coding
H2BC6	2.44654	2.97869	29.0376	7.09871e-08	9.91627e-07	6.00365	UP	protein_coding
CDKN2C	2.33056	2.60882	29.0204	7.16188e-08	9.99544e-07	6.0002	UP	protein_coding
KRT7	4.05807	-0.206215	28.9981	7.24481e-08	1.0102e-06	5.99559	UP	protein_coding
TRIM47	-1.54882	3.23905	28.9872	7.28591e-08	1.01437e-06	5.9938	DOWN	protein_coding
SNAPC1	-0.759436	4.39116	28.9866	7.2879e-08	1.01437e-06	5.9938	NO	protein_coding
ELP2	-0.527249	6.54198	28.9232	7.53039e-08	1.04623e-06	5.98037	NO	protein_coding
TRIM5	-0.880547	5.74525	28.9043	7.60452e-08	1.05557e-06	5.97651	NO	protein_coding
GDE1	-0.607384	6.22329	28.8818	7.69328e-08	1.06693e-06	5.97186	NO	protein_coding
TSLP	-3.12102	2.34736	28.8748	7.72114e-08	1.06983e-06	5.97069	DOWN	protein_coding
CAND2	-0.962661	4.00515	28.8581	7.7878e-08	1.07772e-06	5.96749	NO	protein_coding
H1.4	1.77607	4.61955	28.8571	7.79211e-08	1.07772e-06	5.96749	UP	protein_coding
ANKRD36C	1.15919	4.19448	28.8471	7.83235e-08	1.08228e-06	5.96566	UP	protein_coding
MYO7B	4.43954	-1.08182	28.8454	7.83916e-08	1.08228e-06	5.96566	UP	protein_coding
RAB20	2.7509	-0.24037	28.8144	7.96553e-08	1.09874e-06	5.9591	UP	protein_coding
AKIRIN1	-0.493217	6.20684	28.8067	7.99753e-08	1.1017e-06	5.95794	NO	protein_coding
NDUFB7	0.797857	4.11806	28.8058	8.00128e-08	1.1017e-06	5.95794	NO	protein_coding
GLCE	-0.716334	6.13143	28.8015	8.01886e-08	1.10313e-06	5.95737	NO	protein_coding
UBN2	0.718612	5.45708	28.745	8.25645e-08	1.13379e-06	5.94547	NO	protein_coding
MCM4	1.5127	5.50869	28.7412	8.27247e-08	1.13497e-06	5.94501	UP	protein_coding
PDPN	-2.9143	2.2896	28.7192	8.36715e-08	1.14694e-06	5.94046	DOWN	protein_coding
PLK4	2.73409	3.14821	28.7124	8.39642e-08	1.14993e-06	5.93933	UP	protein_coding
CAMK1D	-1.88792	3.588	28.6953	8.47081e-08	1.15805e-06	5.93627	DOWN	protein_coding
EIF3L	-0.553997	7.33008	28.6869	8.50756e-08	1.16204e-06	5.93478	NO	protein_coding
ZNF24	-0.408918	6.16252	28.6515	8.6648e-08	1.18142e-06	5.92759	NO	protein_coding
MAP4K5	-0.485664	6.605	28.6441	8.69766e-08	1.18485e-06	5.92634	NO	protein_coding
CEP128	2.30579	2.70035	28.6113	8.84628e-08	1.20403e-06	5.91936	UP	protein_coding
DOT1L	1.15353	5.57528	28.5583	9.09195e-08	1.23638e-06	5.90785	UP	protein_coding
TMEM263	-0.581543	7.55755	28.5279	9.23593e-08	1.25485e-06	5.90141	NO	protein_coding
MSRB3	-0.604328	6.88483	28.468	9.52591e-08	1.2931e-06	5.88837	NO	protein_coding
BDNF	-0.899697	6.92018	28.4322	9.70386e-08	1.31498e-06	5.88108	NO	protein_coding
KANTR	1.30796	3.00132	28.4321	9.70419e-08	1.31498e-06	5.88108	UP	protein_coding
CDK1	3.00936	3.82965	28.3975	9.87903e-08	1.3375e-06	5.87371	UP	protein_coding
ZDHHC12	0.740011	3.51521	28.3804	9.96693e-08	1.34821e-06	5.87024	NO	protein_coding
TMSB4X	-0.794036	9.1784	28.3613	1.00659e-07	1.3604e-06	5.86633	NO	protein_coding
OSTC	-0.59632	6.36301	28.3539	1.01041e-07	1.36437e-06	5.86507	NO	protein_coding
H1.2	1.42027	5.63879	28.3354	1.02015e-07	1.3763e-06	5.86129	UP	protein_coding
PRKAB1	-0.632989	4.16516	28.2979	1.04011e-07	1.402e-06	5.85325	NO	protein_coding
H2AC8	2.15104	4.61544	28.2743	1.05287e-07	1.41796e-06	5.84834	UP	protein_coding
ZBTB18	-0.854464	4.34632	28.2587	1.06138e-07	1.42693e-06	5.8456	NO	protein_coding
PLEK2	2.12305	0.907141	28.2558	1.06295e-07	1.42779e-06	5.84533	UP	protein_coding
ZDHHC4	-0.72716	3.85878	28.2363	1.07372e-07	1.441e-06	5.84134	NO	protein_coding
H2BC17	2.56417	3.22916	28.1547	1.11997e-07	1.49914e-06	5.82416	UP	protein_coding
RPS4Y1	-0.559626	6.74278	28.1401	1.12846e-07	1.50919e-06	5.82126	NO	protein_coding
NEK2	3.37007	2.48913	28.1103	1.14596e-07	1.53127e-06	5.81495	UP	protein_coding
CTAGE6	3.99548	-1.18841	28.0806	1.16367e-07	1.55358e-06	5.80867	UP	protein_coding
CCN2	-1.94366	9.91686	28.0684	1.17103e-07	1.56069e-06	5.80668	DOWN	protein_coding
TRMT12	-0.865964	2.75475	28.0395	1.18867e-07	1.58283e-06	5.80057	NO	protein_coding
LRRC8B	-1.79937	1.52371	28.0284	1.1955e-07	1.59055e-06	5.79845	DOWN	protein_coding
GXYLT2	-1.93113	4.6899	28.018	1.20194e-07	1.59774e-06	5.79649	DOWN	protein_coding
BET1L	-0.655348	5.77059	28.0131	1.20496e-07	1.60037e-06	5.79578	NO	protein_coding
MEX3C	-0.559502	5.81137	27.9933	1.21738e-07	1.61407e-06	5.79208	NO	protein_coding
GFOD1	-0.831481	4.29747	27.9859	1.22203e-07	1.61884e-06	5.79079	NO	protein_coding
MT.ND5	2.14719	9.19442	27.9422	1.24994e-07	1.6544e-06	5.78136	UP	protein_coding
HJURP	2.79778	4.02273	27.9219	1.26309e-07	1.67037e-06	5.77719	UP	protein_coding
H2BC26	2.1326	0.199512	27.9039	1.27494e-07	1.68458e-06	5.77351	UP	protein_coding
FAM210A	0.75879	3.7383	27.8899	1.28417e-07	1.69533e-06	5.77075	NO	protein_coding
SLC37A3	-0.572454	5.29588	27.8677	1.29902e-07	1.71346e-06	5.76613	NO	protein_coding
SPATA2	-0.608634	3.51456	27.8291	1.32517e-07	1.74347e-06	5.75859	NO	protein_coding
EIF3H	-0.475718	6.89874	27.8161	1.33414e-07	1.75376e-06	5.75603	NO	protein_coding
TMEM237	-0.890818	5.03982	27.8108	1.33778e-07	1.75706e-06	5.75521	NO	protein_coding
[truncated: 12,079 more rows]

## Sheet: Table S5
Table S5: Differential mRNA expression for fibroblast treated with Met5A 2.8k EV vs VMC23 2.8k EV
[truncated: 12,891 more rows]

[truncated: 20 more sheets: Table S6, Table S7, Table S8, Table S9, Table S10, Table S11, Table S12, Table S13, Table S14, Table S15, Table S16, Table S17, Table S18, Table S19, Table S20, Table S21, Table S22, Table S23, Table S24, Table S25]
