# Supplementary material
Source: Research Square preprint supplement (doi:10.21203/rs.3.rs-9648282/v1)
Supplement: Supplementary file 5 [file 6d8bb2aa7edf76bfae1c9732.pdf]

# Figure S6

2.8K

10K

A

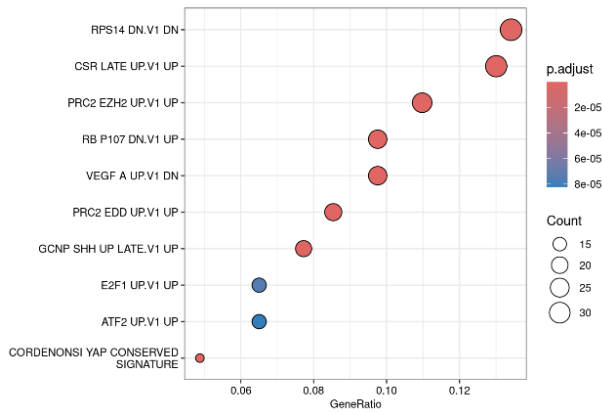

C

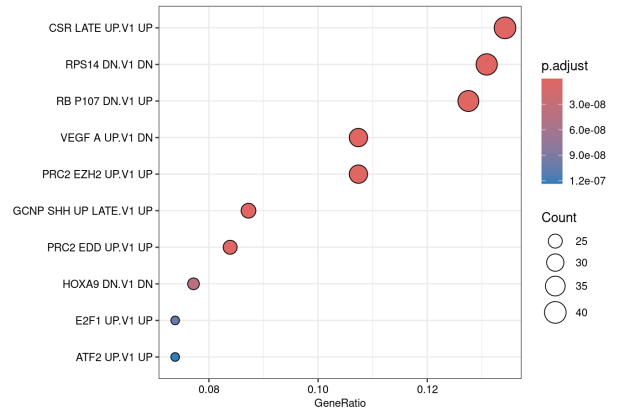

Upregulated genes

B

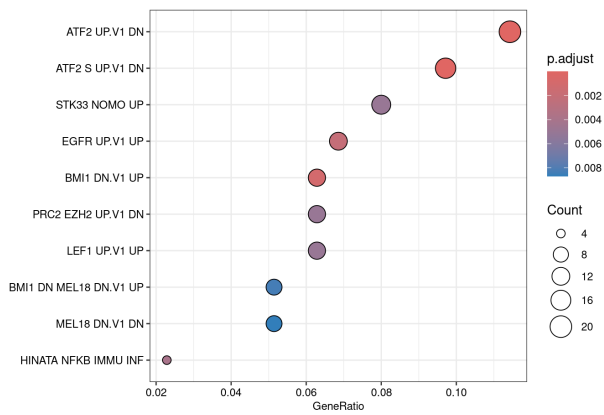

Down-regulated genes

D

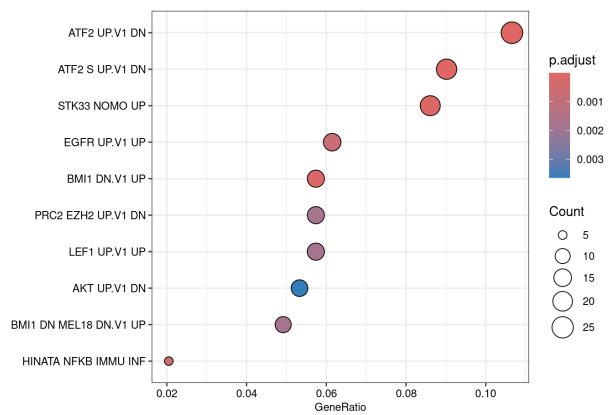

Down-regulated genes

**Figure S6: Gene set enrichment analysis (GSEA) of fibroblasts (MRC5) treated with Met5A and VMC23-derived EVs for MSigDB\_Oncogenic\_Signatures.** Differential expression results from fibroblasts treated with Met5A and VMC23-derived EVs (2.8k, 10k, 100k) were used for the analysis. The enrichment analysis was performed separately for the up- or downregulated mRNA using the clusterProfiler package (R). Gene sets with  $p \leq 0.05$  were considered significantly enriched.

**A-B)** GSEA for up- and down-regulated mRNA in fibroblasts (MRC5) treated with 2.8k EV fractions.

**C-D)** GSEA for up- and down-regulated mRNA in fibroblasts (MRC5) treated with 10k EV fractions.
