# Supplementary material
Source: Research Square preprint supplement (doi:10.21203/rs.3.rs-9648282/v1)
Supplement: Supplementary file 6 [file 85ec507a42284a4fbc394730.pdf]

# Figure S9

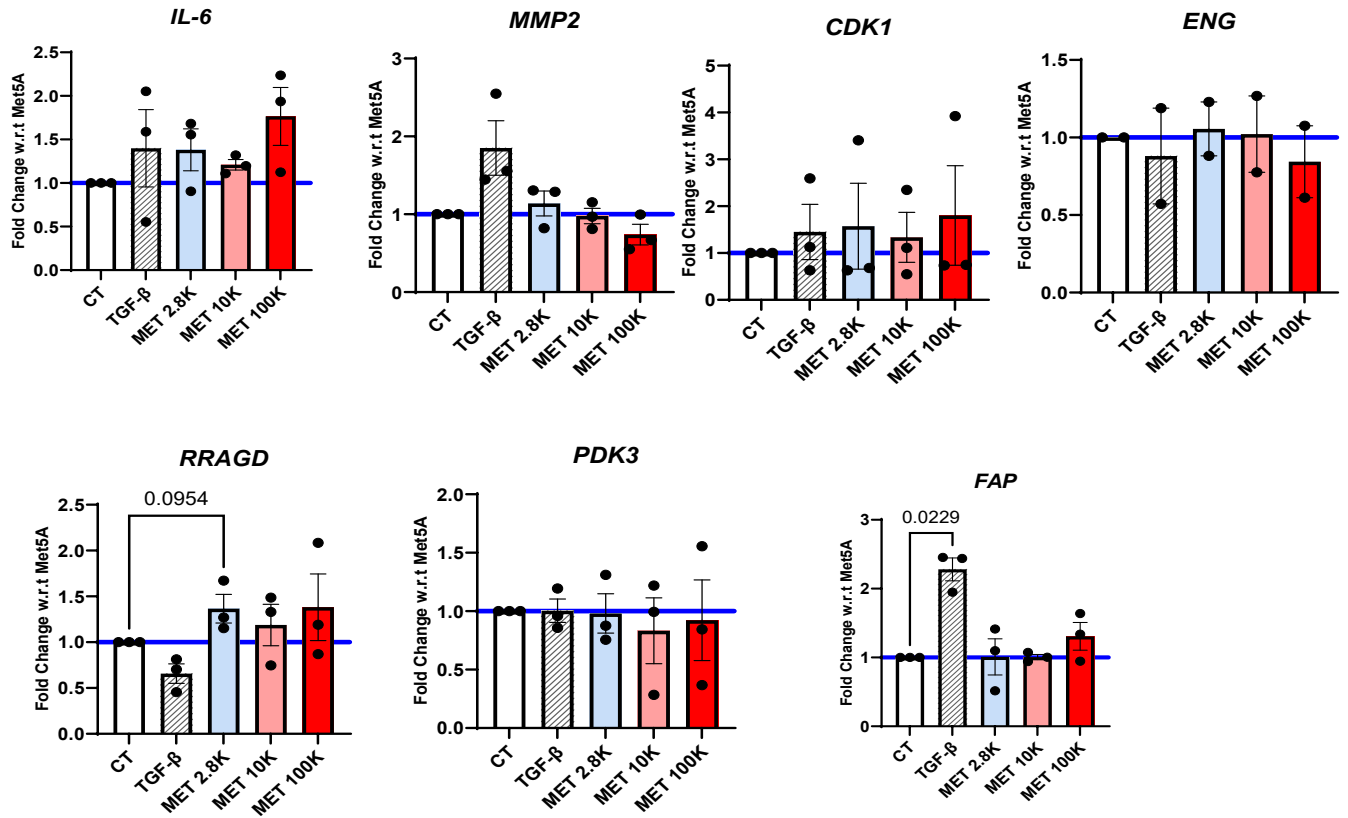

**Figure S9:** qPCR analysis for inflammatory, hypoxia, and metabolism-associated markers in fibroblasts (MRC5) treated with Met5A (MET) derived EVS (n=3; statistical analysis one-way ANOVA followed by Kruskal-Wallis test  $p < 0.05$ ). **CT:** Untreated fibroblast; **TGF-β:** fibroblast treated with TGF-β (positive control); **MET 2.8k/10k/100k:** Fibroblasts treated with EV fractions isolated by differential centrifugation from the indicated cell lines.
