# Supplementary material
Source: Research Square preprint supplement (doi:10.21203/rs.3.rs-9648282/v1)
Supplement: Supplementary file 7 [file b002b2d9a3ded85df13147e6.pdf]

# Figure S4

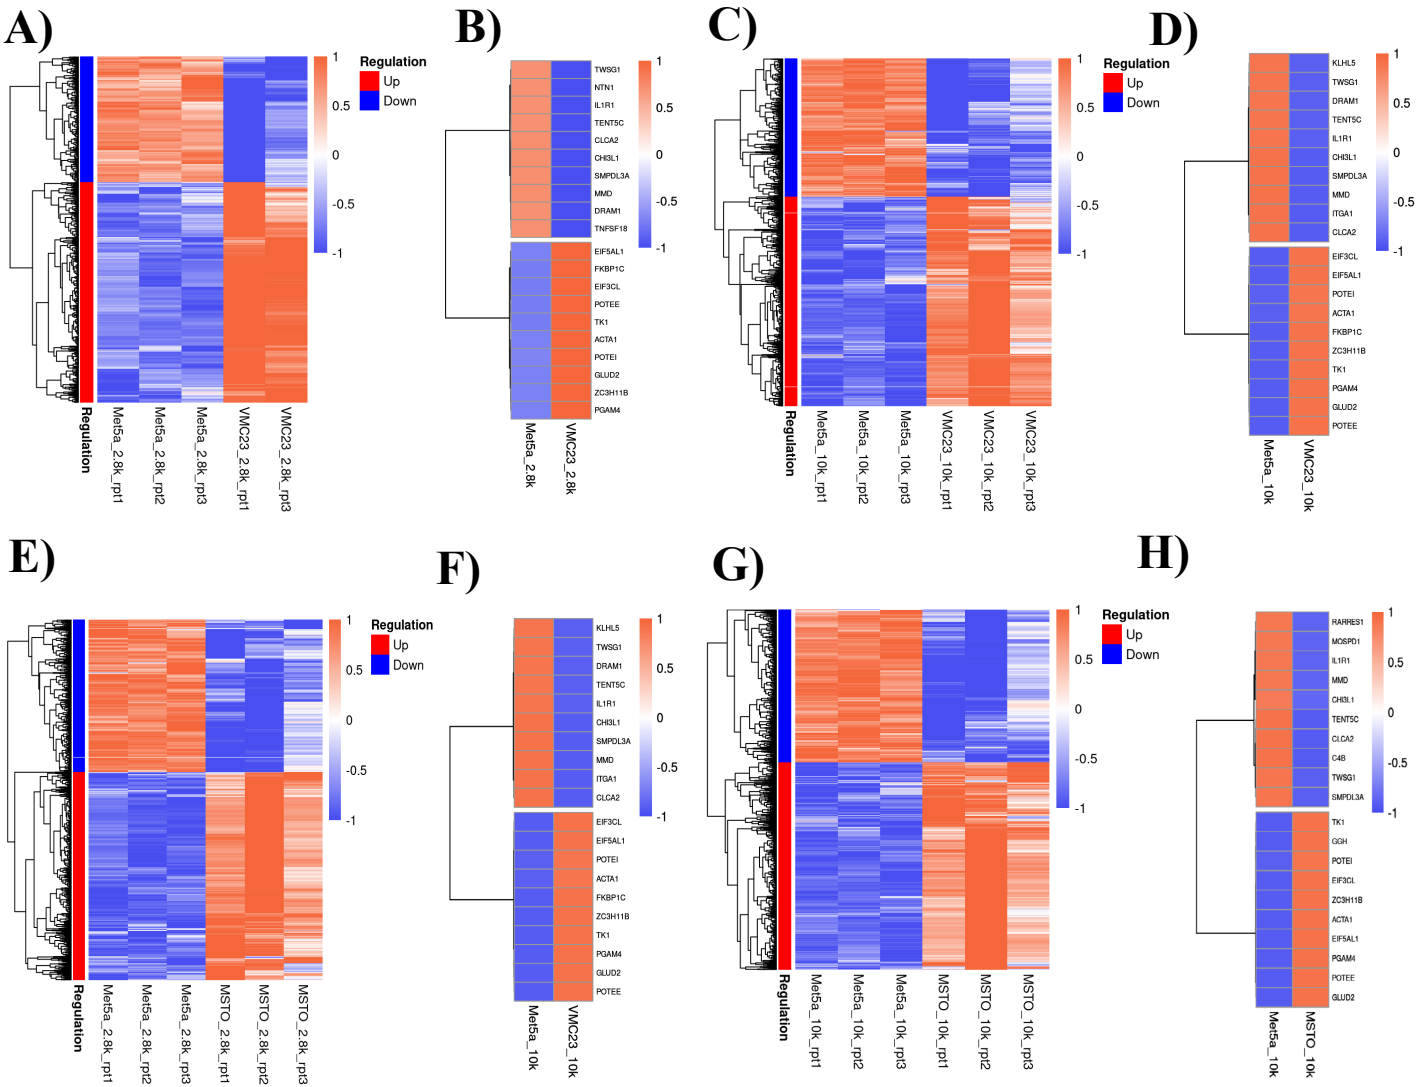

**Figure S4: A, C)** Heatmap showing differential gene expression in fibroblasts (MRC5) after treatment with epithelioid (VMC23) PM-derived EVs compared to non-malignant control (Met5A) EVs (FDR  $\leq 0.05$  & FC  $> |2|$ ) (n=3 for all samples, except for VMC23 2.8k where n=2). **B, D)** Top upregulated and downregulated mRNAs (**Heatmap of average expression across all the replicates**) in fibroblasts treated with VMC23 -derived EVs compared to non-cancerous EVs (FDR  $\leq 0.05$  & FC  $> |2|$ ).

**E, G)** Heatmap showing differential gene expression in fibroblasts (MRC5) after treatment non-epithelioid (MSTO) PM-derived EVs compared to non-malignant control (Met5A) EVs (FDR  $\leq 0.05$  & FC  $> |2|$ ) (n=3 for all samples, except MSTO 100k, where n=2). **F, H)** Top upregulated and downregulated mRNAs (**Heatmap of average expression across all the replicates**) in fibroblasts treated with VMC23 or MSTO-derived EVs compared to non-cancerous EVs (FDR  $\leq 0.05$  & FC  $> |2|$ ).
