# Supplementary material
Source: Research Square preprint supplement (doi:10.21203/rs.3.rs-9648282/v1)
Supplement: Supplementary file 8 [file b4fb17fe91f10f7ffe373731.pdf]

# Figure S8

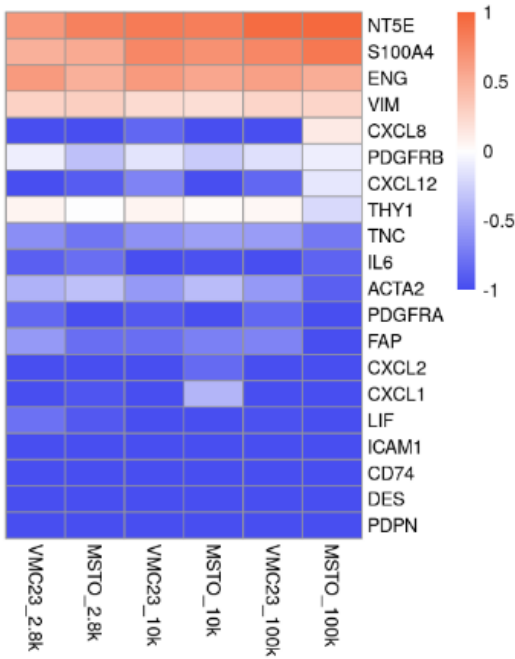

**CAF markers**

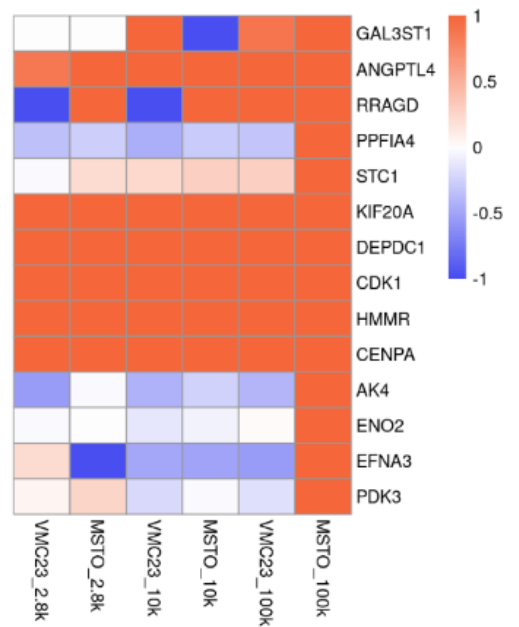

**Hypoxia**

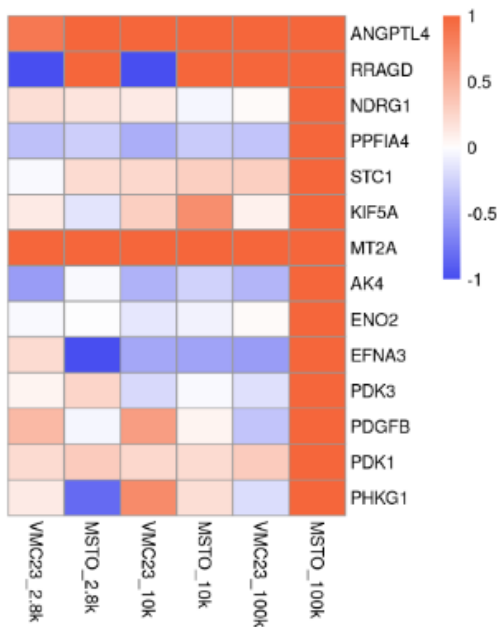

**Metabolism**

**Figure S8: Gene expression of cancer-associated fibroblasts (CAF), Hypoxia, and cellular metabolism markers.** Heatmap showing CAF, hypoxia, and cellular metabolism genes in fibroblasts (MRC5) treated with epithelioid (VMC23), non-epithelioid (MSTO), and non-malignant control (Met5A) EVs (2.8k, 10k, 100k). Each treatment from VMC23 and MSTO was normalised to the corresponding Met5A EV fraction (e.g., VMC23 2.8k relative to Met5A 2.8k), so Met5A is not shown. Data represent the average of three biological replicates. Colour intensity indicates relative gene expression compared to the Met5A reference.
