# Supplementary material
Source: Research Square preprint supplement (doi:10.21203/rs.3.rs-9648282/v1)
Supplement: Supplementary file 11 [file f9e82cd752cb77f46b8aa03f.pdf]

# Figure S10

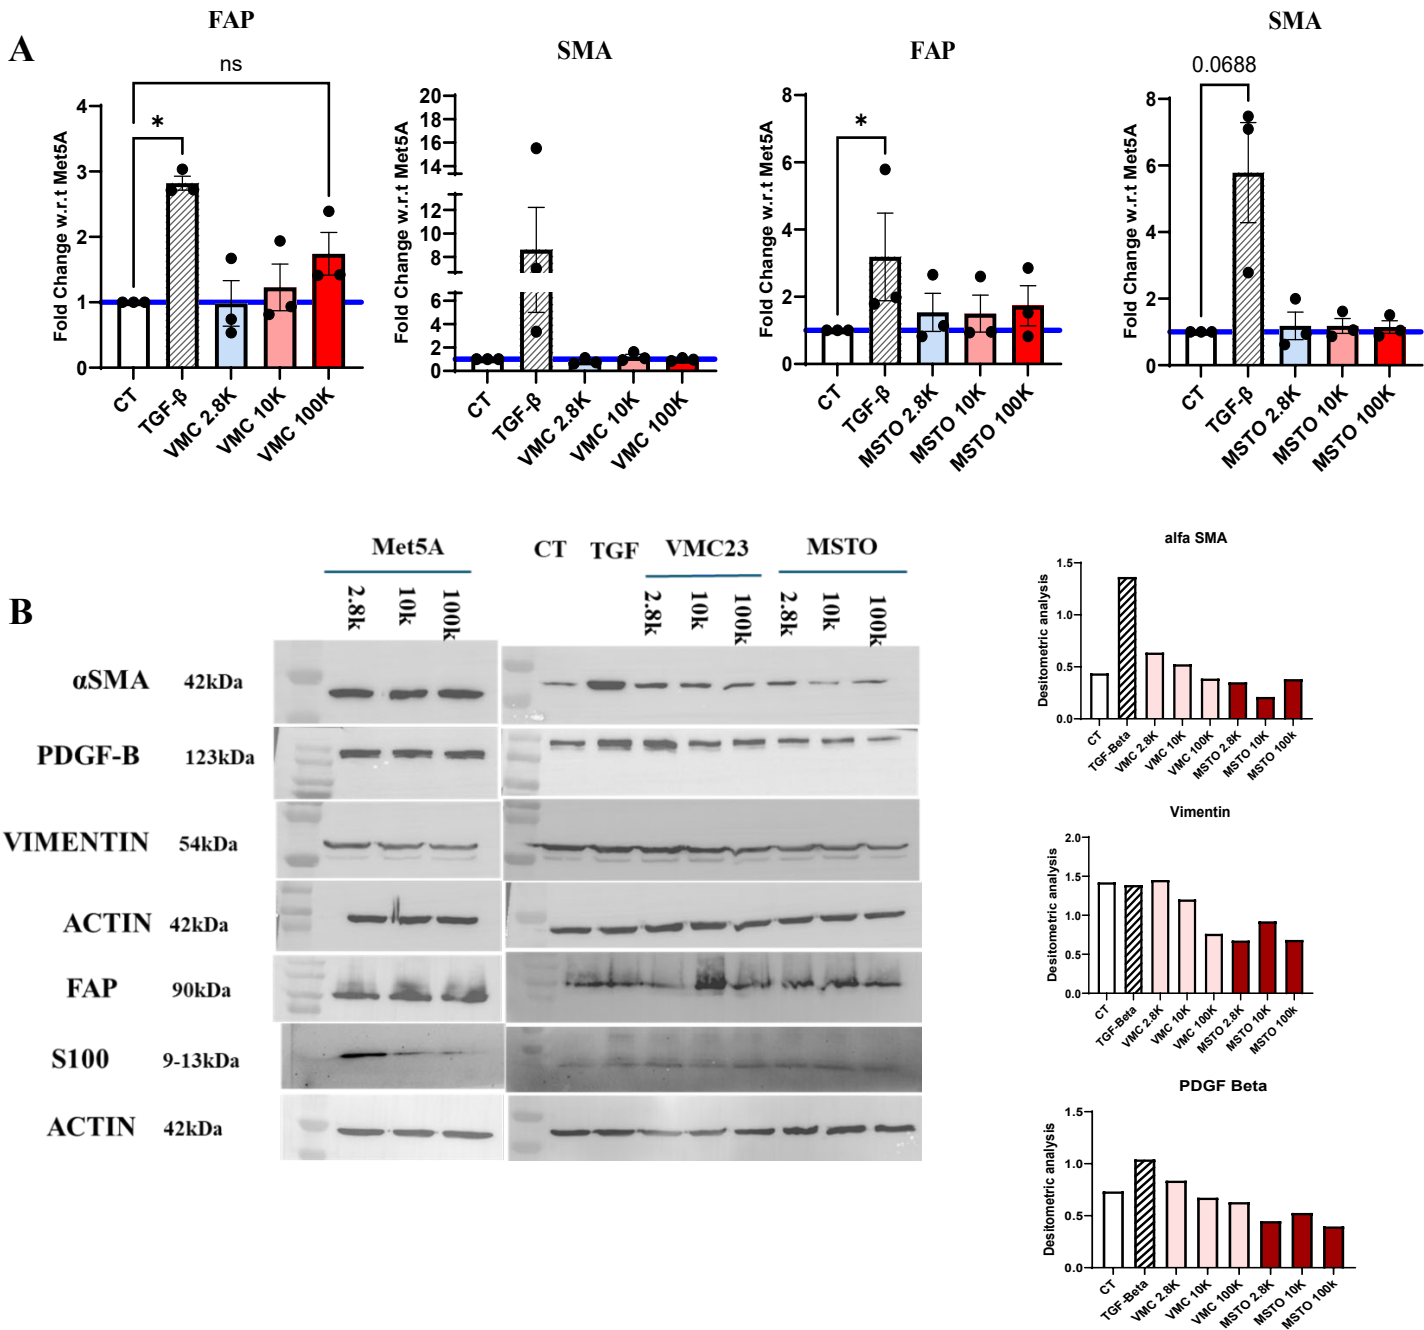

**Figure S10: Analysis of myofibroblastic cancer-associated fibroblasts (myCAF) markers in fibroblasts (MRC5) treated with epithelioid (VMC23), non-epithelioid (MSTO), and non-malignant control (Met5A) EVs:**

**A)** qPCR analysis for FAP and SMA genes. CT- untreated control cells (MRC5); TGF- $\beta$ - fibroblast treated with TGF- $\beta$ , positive control for myCAF induction; Met5A, VMC23, MSTO 2.8k/10k/100k: Fibroblasts treated with EV fractions isolated by differential centrifugation from the indicated cell lines ( $2,800 \times g$ ,  $10,000 \times g$ , and  $100,000 \times g$ ). Significance levels are indicated as  $*p < 0.05$ . Data represent mean  $\pm$  SEM of  $n = 3$  biological replicates.

**B)** Western blot analysis band and densitometric analysis for myCAF markers. Protein levels of alpha SMA, PDGF-B, Vimentin, FAP, and S100 in fibroblasts treated with EV fractions isolated from Met5A, MSTO, and VMC23 cells. Densitometric values were normalised to a loading control  $\beta$ -actin.  $n=1$ .
